# Supplementary material
Source: PubMed Central journal article supplement (PMC9979158)
Supplement: NIHMS1868364-supplement-Supplement2.pdf [file NIHMS1868364-supplement-Supplement2.pdf]

**Supplemental Tables for "Bayesian Inference of Chemical Exposures from NHANES Urine Biomonitoring Data", Stanfield et al.**

- Table S1. Table 1 of the bayesmarker input file, the metabolites table. Lists metabolite, NHANES code, cohort, NHANES file, units, etc.
- Table S2. Table 2 of the bayesmarker input file, the weights table. Lists other NHANES files and needed columns to perform scaling and other transformations of the concentration data.
- Table S3. Table 3 of the bayesmarker input file, the parent-metabolite map.
- Table S4. Exposure estimates (median and 95% credible intervals) for all parent chemicals using the most recent NHANES cohort concentration data of the metabolites.
- Table S5. Log2 fold change in the median predicted exposure between each population group and the median exposure across all individuals for all parent chemicals.
- Table S6. Fold changes with 95% confidence intervals for all chemical-population group pairs in Figure 4 that had significant differences in exposure compared to the total population.
- Table S7. Bioactivity:exposure ratios (BER) for parent chemicals of NHANES metabolites with 95% confidence intervals.
- Table S8. Fold change in exposure between all NHANES participants and children population groups (age 3 to 5 and age 6 to 11).
- Table S9. Comparison of bayesmarker exposure inferences to SEEM predictions for chemicals not in the SEEM calibration set for the four most recent NHANES cohorts.  
R-squared values and 95% CIs for comparison of bayesmarker exposure inferences and
- Table S10. SEEM predictions for chemicals not in the SEEM training set for the four most recent NHANES cohorts.

Table S1. Table 1 of the bayesmarker input file, the metabolites table. Lists metabolite, NHANES code, cohort, NHANES file, units, etc.

Notes: A row is included for a metabolite for all NHANES cohorts for which it has data. All the analysis in the manuscript except for the SEEM comparison and uncertainty examination use the data from the most recent cohort. Abbreviations: NHANEScode (variable name for metabolite), NHANESfile (file containing the metabolite), recent\_sample (sample in which metabolite was measured), most\_recent\_cohort (yes if this row is the most recent cohort for this metabolite, which would mean it was used in the analyses in the manuscript)

| DTXSID          | NHANEScode | NHANESfile | recent_sa<br>mple | Name                                        | CAS         | Media | MaxAge | units | Most_recent<br>_cohort |
|-----------------|------------|------------|-------------------|---------------------------------------------|-------------|-------|--------|-------|------------------------|
| DTXSID50184485  | SSBCEP     | SSFR_G     | 11-12             | Bis(2-chloroethyl) phosphate                | 3040-56-0   | Urine | 150    | ug/L  | no                     |
| DTXSID50184485  | SSBCEP     | SSFLRT_H   | 13-14             | Bis(2-chloroethyl) phosphate                | 3040-56-0   | Urine | 150    | ug/L  | yes                    |
| DTXSID90274172  | SSBCPP     | SSFR_G     | 11-12             | Bis(1-chloro-2-propyl) phosp                | 789440-10-4 | Urine | 150    | ug/L  | no                     |
| DTXSID90274172  | SSBCPP     | SSFLRT_H   | 13-14             | Bis(1-chloro-2-propyl) phosp                | 789440-10-4 | Urine | 150    | ug/L  | yes                    |
| DTXSID30992969  | SSBDCPP    | SSFLRT_H   | 13-14             | Bis(1,3-dichloro-2-propyl) ph               | 72236-72-7  | Urine | 150    | ug/L  | yes                    |
| DTXSID30992969  | SSBDCPP    | SSFR_G     | 11-12             | Bis(1,3-dichloro-2-propyl) ph               | 72236-72-7  | Urine | 150    | ug/L  | no                     |
| DTXSID3040728   | SSDBUP     | SSFLRT_H   | 13-14             | Dibutyl phosphate (DBuP)                    | 107-66-4    | Urine | 150    | ug/L  | yes                    |
| DTXSID3040728   | SSDBUP     | SSFR_G     | 11-12             | Dibutyl phosphate (DBuP)                    | 107-66-4    | Urine | 150    | ug/L  | no                     |
| DTXSID1033402   | SSDBZP     | SSFR_G     | 11-12             | Dibenzyl phosphate (DBzP)                   | 1623-08-1   | Urine | NA     | ug/L  | no                     |
| DTXSID1033402   | SSDBZP     | SSFLRT_H   | 13-14             | Dibenzyl phosphate (DBzP)                   | 1623-08-1   | Urine | NA     | ug/L  | yes                    |
| DTXSID70957173  | SSDOCP     | SSFLRT_H   | 13-14             | Di-o-cresylphosphate (DoCP)                 | 35787-74-7  | Urine | NA     | ug/L  | yes                    |
| DTXSID70233262  | SSDPCP     | SSFLRT_H   | 13-14             | Di-p-cresylphosphate (DpCP)                 | 843-24-3    | Urine | 150    | ug/L  | yes                    |
| DTXSID801027635 | SSECP      | SSMHHT_I   | 15-16             | Mono-2-ethyl-5-carboxypentyl terephthalate  |             | Urine | 150    | ug/L  | yes                    |
| DTXSID501027636 | SSMHHT     | SSMHHT_I   | 15-16             | Mono-2-ethyl-5-hydroxyhexyl terephthalate ( |             | Urine | 150    | ug/L  | yes                    |
| DTXSID201027637 | SSMONP     | SSMHHT_I   | 15-16             | Mono-oxoisobutyl phthalate                  | 297182-83-3 | Urine | 150    | ug/L  | yes                    |
| DTXSID201016690 | SSTBBA     | SSFR_G     | 11-12             | 2,3,4,5-Tetrabromobenzoic a                 | 27581-13-1  | Urine | 150    | ug/L  | no                     |
| DTXSID201016690 | SSTBBA     | SSFLRT_H   | 13-14             | 2,3,4,5-Tetrabromobenzoic a                 | 27581-13-1  | Urine | 150    | ug/L  | yes                    |
| DTXSID7025003   | URX14D     | EPHPP_I    | 15-16             | 2,5-Dichlorophenol                          | 583-78-8    | Urine | 150    | ng/mL | yes                    |
| DTXSID7025003   | URX14D     | EPHPP_H    | 13-14             | 2,5-Dichlorophenol                          | 583-78-8    | Urine | 150    | ug/L  | no                     |
| DTXSID7025003   | URX14D     | PP_F       | 09-10             | 2,5-Dichlorophenol                          | 583-78-8    | Urine | 150    | ug/L  | no                     |
| DTXSID7025003   | URX14D     | PP_E       | 07-08             | 2,5-Dichlorophenol                          | 583-78-8    | Urine | 150    | ug/L  | no                     |
| DTXSID7025003   | URX14D     | L24PP_C    | 03-04             | 2,5-Dichlorophenol                          | 583-78-8    | Urine | 150    | ug/L  | no                     |
| DTXSID7025003   | URX14D     | PP_D       | 05-06             | 2,5-Dichlorophenol                          | 583-78-8    | Urine | 150    | ug/L  | no                     |
| DTXSID7025003   | URX14D     | PP_G       | 11-12             | 2,5-Dichlorophenol                          | 583-78-8    | Urine | 150    | ug/L  | no                     |
| -               | URX1DC     | SSUVOC_D   | 05-06             | N-Acetyl-S-(1,2-dichlorovinyl               | 2148-31-4   | Urine | 150    | ng/mL | no                     |
| -               | URX1DC     | UVOC_I     | 15-16             | N-Acetyl-S-(1,2-dichlorovinyl               | 2148-31-4   | Urine | 150    | ng/mL | yes                    |
| -               | URX1DC     | UVOC_G     | 11-12             | N-Acetyl-S-(1,2-dichlorovinyl               | 2148-31-4   | Urine | 150    | ng/mL | no                     |
| -               | URX1DC     | UVOC_H     | 13-14             | N-Acetyl-S-(1,2-dichlorovinyl               | 2148-31-4   | Urine | 150    | ng/mL | no                     |
| DTXSID4024359   | URX1TB     | PP_F       | 09-10             | 2,4,5-Trichlorophenol                       | 95-95-4     | Urine | 150    | ug/L  | yes                    |
| DTXSID4024359   | URX1TB     | PP_E       | 07-08             | 2,4,5-Trichlorophenol                       | 95-95-4     | Urine | 150    | ug/L  | no                     |
| DTXSID4024359   | URX1TB     | L24PP_C    | 03-04             | 2,4,5-Trichlorophenol                       | 95-95-4     | Urine | 150    | ug/L  | no                     |
| DTXSID4024359   | URX1TB     | PP_D       | 05-06             | 2,4,5-Trichlorophenol                       | 95-95-4     | Urine | 150    | ug/L  | no                     |
| DTXSID0020442   | URX24D     | LAB26PP    | 99-00             | 2,4-Dichlorophenoxyacetic a                 | 94-75-7     | Urine | 150    | ug/L  | no                     |
| DTXSID0020442   | URX24D     | UPHOPM_E   | 07-08             | 2,4-Dichlorophenoxyacetic a                 | 94-75-7     | Urine | 150    | ug/L  | no                     |
| DTXSID0020442   | URX24D     | UPHOPM_F   | 09-10             | 2,4-Dichlorophenoxyacetic a                 | 94-75-7     | Urine | 150    | ug/L  | no                     |
| DTXSID0020442   | URX24D     | UPHOPM_G   | 11-12             | 2,4-Dichlorophenoxyacetic a                 | 94-75-7     | Urine | 150    | ug/L  | no                     |
| DTXSID0020442   | URX24D     | UPHOPM_H   | 13-14             | 2,4-Dichlorophenoxyacetic a                 | 94-75-7     | Urine | 150    | ug/L  | yes                    |
| DTXSID0020442   | URX24D     | L26UPP_C   | 03-04             | 2,4-Dichlorophenoxyacetic a                 | 94-75-7     | Urine | 150    | ug/L  | no                     |

| DTXSID         | NHANEScode | NHANESfile | recent_sa<br>mple | Name                          | CAS         | Media | MaxAge | units | Most_recent<br>_cohort |
|----------------|------------|------------|-------------------|-------------------------------|-------------|-------|--------|-------|------------------------|
| DTXSID0020442  | URX24D     | I26PP_B    | 01-02             | 2,4-Dichlorophenoxyacetic a   | 94-75-7     | Urine | 150    | ug/L  | no                     |
| DTXSID5021388  | URX25T     | UPHOPM_F   | 09-10             | 2,4,5-Trichlorophenoxyacetic  | 93-76-5     | Urine | 150    | ug/L  | yes                    |
| DTXSID5021388  | URX25T     | L26UPP_C   | 03-04             | 2,4,5-Trichlorophenoxyacetic  | 93-76-5     | Urine | 150    | ug/L  | no                     |
| DTXSID5021388  | URX25T     | UPHOPM_E   | 07-08             | 2,4,5-Trichlorophenoxyacetic  | 93-76-5     | Urine | 150    | ug/L  | no                     |
| DTXSID5021388  | URX25T     | LAB26PP    | 99-00             | 2,4,5-Trichlorophenoxyacetic  | 93-76-5     | Urine | 150    | ug/L  | no                     |
| DTXSID5021388  | URX25T     | I26PP_B    | 01-02             | 2,4,5-Trichlorophenoxyacetic  | 93-76-5     | Urine | 150    | ug/L  | no                     |
| DTXSID80925585 | URX2DC     | UVOC_I     | 15-16             | S-(2,2-Dichloroethenyl)-N-(1- | 126543-43-9 | Urine | 150    | ng/mL | yes                    |
| DTXSID80925585 | URX2DC     | SSUVOC_D   | 05-06             | S-(2,2-Dichloroethenyl)-N-(1- | 126543-43-9 | Urine | 150    | ng/mL | no                     |
| DTXSID80925585 | URX2DC     | UVOC_G     | 11-12             | S-(2,2-Dichloroethenyl)-N-(1- | 126543-43-9 | Urine | 150    | ng/mL | no                     |
| DTXSID80925585 | URX2DC     | UVOC_H     | 13-14             | S-(2,2-Dichloroethenyl)-N-(1- | 126543-43-9 | Urine | 150    | ng/mL | no                     |
| DTXSID60194818 | URX2MH     | UVOC_H     | 13-14             | 2-Methylhippuric acid         | 42013-20-7  | Urine | 150    | ng/mL | no                     |
| DTXSID60194818 | URX2MH     | SSUVOC_D   | 05-06             | 2-Methylhippuric acid         | 42013-20-7  | Urine | 150    | ng/mL | no                     |
| DTXSID60194818 | URX2MH     | UVOC_I     | 15-16             | 2-Methylhippuric acid         | 42013-20-7  | Urine | 150    | ng/mL | yes                    |
| DTXSID60194818 | URX2MH     | UVOC_G     | 11-12             | 2-Methylhippuric acid         | 42013-20-7  | Urine | 150    | ng/mL | no                     |
| DTXSID90181579 | URX34M     | UVOC_G     | 11-12             | 3-Methylhippuric acid         | 27115-49-7  | Urine | 150    | ng/mL | no                     |
| DTXSID90181579 | URX34M     | SSUVOC_D   | 05-06             | 3-Methylhippuric acid         | 27115-49-7  | Urine | 150    | ng/mL | no                     |
| DTXSID90181579 | URX34M     | UVOC_H     | 13-14             | 3-Methylhippuric acid         | 27115-49-7  | Urine | 150    | ng/mL | no                     |
| DTXSID90181579 | URX34M     | UVOC_I     | 15-16             | 3-Methylhippuric acid         | 27115-49-7  | Urine | 150    | ng/mL | yes                    |
| DTXSID5021386  | URX3TB     | PP_E       | 07-08             | 2,4,6-Trichlorophenol         | 88-06-2     | Urine | 150    | ug/L  | no                     |
| DTXSID5021386  | URX3TB     | PP_D       | 05-06             | 2,4,6-Trichlorophenol         | 88-06-2     | Urine | 150    | ug/L  | no                     |
| DTXSID5021386  | URX3TB     | L24PP_C    | 03-04             | 2,4,6-Trichlorophenol         | 88-06-2     | Urine | 150    | ug/L  | no                     |
| DTXSID5021386  | URX3TB     | PP_F       | 09-10             | 2,4,6-Trichlorophenol         | 88-06-2     | Urine | 150    | ug/L  | yes                    |
| DTXSID00228005 | URX4FP     | UPHOPM_G   | 11-12             | Fluoro-phenoxybenzoic acid    | 77279-89-1  | Urine | 150    | ug/L  | no                     |
| DTXSID00228005 | URX4FP     | UPHOPM_H   | 13-14             | Fluoro-phenoxybenzoic acid    | 77279-89-1  | Urine | 150    | ug/L  | yes                    |
| DTXSID00228005 | URX4FP     | LAB26PP    | 99-00             | Fluoro-phenoxybenzoic acid    | 77279-89-1  | Urine | 150    | ug/L  | no                     |
| DTXSID00228005 | URX4FP     | UPHOPM_F   | 09-10             | Fluoro-phenoxybenzoic acid    | 77279-89-1  | Urine | 150    | ug/L  | no                     |
| DTXSID00228005 | URX4FP     | UPHOPM_E   | 07-08             | Fluoro-phenoxybenzoic acid    | 77279-89-1  | Urine | 150    | ug/L  | no                     |
| DTXSID00228005 | URX4FP     | I26PP_B    | 01-02             | Fluoro-phenoxybenzoic acid    | 77279-89-1  | Urine | 150    | ug/L  | no                     |
| DTXSID9022360  | URX4TO     | EPH_D      | 05-06             | 4-tert-Octylphenol            | 140-66-9    | Urine | 150    | ng/mL | no                     |
| DTXSID9022360  | URX4TO     | EPH_F      | 09-10             | 4-tert-Octylphenol            | 140-66-9    | Urine | 150    | ng/mL | yes                    |
| DTXSID9022360  | URX4TO     | EPH_E      | 07-08             | 4-tert-Octylphenol            | 140-66-9    | Urine | 150    | ng/mL | no                     |
| DTXSID7020001  | URXAAC     | HCAA_H     | 13-14             | 2-Amino-9H-pyrido[2,3-b]inc   | 26148-68-5  | Urine | 150    | pg/mL | yes                    |
| DTXSID9020112  | URXAAZ     | UAM_E      | 07-08             | Atrazine                      | 1912-24-9   | Urine | NA     | ug/L  | yes                    |
| DTXSID70904324 | URXACE     | I26PP_B    | 01-02             | Acetochlor mercapture         | 674808-38-9 | Urine | 150    | ug/L  | yes                    |
|                | URXALA     | LAB26PP    | 99-00             | Alachlor mercapturate         | 116482-92-9 | Urine | 150    | ug/L  | no                     |
| DTXSID00146174 | URXAMC     | UVOC_I     | 15-16             | N-Acetyl-S-(N-methylcarbam    | 103974-29-4 | Urine | 150    | ng/mL | yes                    |
| DTXSID00146174 | URXAMC     | UVOC_H     | 13-14             | N-Acetyl-S-(N-methylcarbam    | 103974-29-4 | Urine | 150    | ng/mL | no                     |
| DTXSID00146174 | URXAMC     | SSUVOC_D   | 05-06             | N-Acetyl-S-(N-methylcarbam    | 103974-29-4 | Urine | 150    | ng/mL | no                     |
| DTXSID00146174 | URXAMC     | UVOC_G     | 11-12             | N-Acetyl-S-(N-methylcarbam    | 103974-29-4 | Urine | 150    | ng/mL | no                     |
| DTXSID8023846  | URXAPE     | CARB_D     | 05-06             | Acephate                      | 30560-19-1  | Urine | 150    | ug/L  | no                     |
| DTXSID8023846  | URXAPE     | CARB_E     | 07-08             | Acephate                      | 30560-19-1  | Urine | 150    | ug/L  | yes                    |
| DTXSID8023846  | URXAPE     | L26UPP_C   | 03-04             | Acephate                      | 30560-19-1  | Urine | 150    | ug/L  | no                     |
| DTXSID90363550 | URXATC     | UVOC_H     | 13-14             | 2-Aminothiazole-4-carboxylic  | 40283-41-8  | Urine | 150    | ng/mL | no                     |
| DTXSID90363550 | URXATC     | UVOC_I     | 15-16             | 2-Aminothiazole-4-carboxylic  | 40283-41-8  | Urine | 150    | ng/mL | yes                    |

| DTXSID         | NHANEScode | NHANESfile | recent_sa<br>mple | Name                          | CAS         | Media | MaxAge | units | Most_recent<br>_cohort |
|----------------|------------|------------|-------------------|-------------------------------|-------------|-------|--------|-------|------------------------|
| DTXSID90363550 | URXATC     | SSUVOG_D   | 05-06             | 2-Aminothiazole-4-carboxylic  | 40283-41-8  | Urine | 150    | ng/mL | no                     |
| DTXSID90363550 | URXATC     | UVOC_G     | 11-12             | 2-Aminothiazole-4-carboxylic  | 40283-41-8  | Urine | 150    | ng/mL | no                     |
| DTXSID90160763 | URXATZ     | UAM_E      | 07-08             | Atrazine mercapturate         | 138722-96-0 | Urine | 150    | ug/L  | yes                    |
| DTXSID90160763 | URXATZ     | LAB26PP    | 99-00             | Atrazine mercapturate         | 138722-96-0 | Urine | 150    | ug/L  | no                     |
| DTXSID90160763 | URXATZ     | I26PP_B    | 01-02             | Atrazine mercapturate         | 138722-96-0 | Urine | 150    | ug/L  | no                     |
| DTXSID90894753 | URXBMA     | UVOC_G     | 11-12             | N-Acetyl-S-(benzyl)-L-cystein | 19542-77-9  | Urine | 150    | ng/mL | no                     |
| DTXSID90894753 | URXBMA     | SSUVOG_D   | 05-06             | N-Acetyl-S-(benzyl)-L-cystein | 19542-77-9  | Urine | 150    | ng/mL | no                     |
| DTXSID90894753 | URXBMA     | UVOC_H     | 13-14             | N-Acetyl-S-(benzyl)-L-cystein | 19542-77-9  | Urine | 150    | ng/mL | no                     |
| DTXSID90894753 | URXBMA     | UVOC_I     | 15-16             | N-Acetyl-S-(benzyl)-L-cystein | 19542-77-9  | Urine | 150    | ng/mL | yes                    |
| DTXSID3022405  | URXBP3     | EPHPP_H    | 13-14             | Benzophenone-3                | 131-57-7    | Urine | 150    | ng/mL | no                     |
| DTXSID3022405  | URXBP3     | EPHPP_I    | 15-16             | Benzophenone-3                | 131-57-7    | Urine | 150    | ng/mL | yes                    |
| DTXSID3022405  | URXBP3     | EPH_E      | 07-08             | Benzophenone-3                | 131-57-7    | Urine | 150    | ng/mL | no                     |
| DTXSID3022405  | URXBP3     | EPH_F      | 09-10             | Benzophenone-3                | 131-57-7    | Urine | 150    | ng/mL | no                     |
| DTXSID3022405  | URXBP3     | EPH_G      | 11-12             | Benzophenone-3                | 131-57-7    | Urine | 150    | ng/mL | no                     |
| DTXSID3022405  | URXBP3     | L24EPH_C   | 03-04             | Benzophenone-3                | 131-57-7    | Urine | 150    | ng/mL | no                     |
| DTXSID3022405  | URXBP3     | EPH_D      | 05-06             | Benzophenone-3                | 131-57-7    | Urine | 150    | ng/mL | no                     |
| DTXSID9022445  | URXBPF     | EPHPP_I    | 15-16             | Bisphenol F                   | 620-92-8    | Urine | 150    | ng/mL | yes                    |
| DTXSID9022445  | URXBPF     | EPHPP_H    | 13-14             | Bisphenol F                   | 620-92-8    | Urine | 150    | ug/L  | no                     |
| DTXSID7020182  | URXBPH     | L24EPH_C   | 03-04             | Bisphenol A                   | 80-05-7     | Urine | 150    | ng/mL | no                     |
| DTXSID7020182  | URXBPH     | EPH_F      | 09-10             | Bisphenol A                   | 80-05-7     | Urine | 150    | ng/mL | no                     |
| DTXSID7020182  | URXBPH     | EPH_D      | 05-06             | Bisphenol A                   | 80-05-7     | Urine | 150    | ng/mL | no                     |
| DTXSID7020182  | URXBPH     | EPHPP_I    | 15-16             | Bisphenol A                   | 80-05-7     | Urine | 150    | ng/mL | yes                    |
| DTXSID7020182  | URXBPH     | EPHPP_H    | 13-14             | Bisphenol A                   | 80-05-7     | Urine | 150    | ng/mL | no                     |
| DTXSID7020182  | URXBPH     | EPH_G      | 11-12             | Bisphenol A                   | 80-05-7     | Urine | 150    | ng/mL | no                     |
| DTXSID7020182  | URXBPH     | EPH_E      | 07-08             | Bisphenol A                   | 80-05-7     | Urine | 150    | ng/mL | no                     |
| DTXSID50162602 | URXBPM     | UVOC_I     | 15-16             | N-Acetyl-S-propyl-L-cysteine  | 14402-54-1  | Urine | 150    | ng/mL | yes                    |
| DTXSID50162602 | URXBPM     | UVOC_H     | 13-14             | N-Acetyl-S-propyl-L-cysteine  | 14402-54-1  | Urine | 150    | ng/mL | no                     |
| DTXSID50162602 | URXBPM     | UVOC_G     | 11-12             | N-Acetyl-S-propyl-L-cysteine  | 14402-54-1  | Urine | 150    | ng/mL | no                     |
| DTXSID50162602 | URXBPM     | SSUVOG_D   | 05-06             | N-Acetyl-S-propyl-L-cysteine  | 14402-54-1  | Urine | 150    | ng/mL | no                     |
| DTXSID3022409  | URXBPS     | EPHPP_H    | 13-14             | Bisphenol S                   | 80-09-1     | Urine | 150    | ug/L  | no                     |
| DTXSID3022409  | URXBPS     | EPHPP_I    | 15-16             | Bisphenol S                   | 80-09-1     | Urine | 150    | ng/mL | yes                    |
| DTXSID7024164  | URXBPM     | UPP_D      | 05-06             | Bensulfuron-methyl            | 83055-99-6  | Urine | 150    | ug/L  | no                     |
| DTXSID7024164  | URXBPM     | UPP_E      | 07-08             | Bensulfuron-methyl            | 83055-99-6  | Urine | 150    | ug/L  | yes                    |
| DTXSID7024164  | URXBPM     | L26UPP_C   | 03-04             | Bensulfuron-methyl            | 83055-99-6  | Urine | 150    | ug/L  | no                     |
| DTXSID3020209  | URXBUP     | EPHPP_I    | 15-16             | Butyl paraben                 | 94-26-8     | Urine | 150    | ng/mL | yes                    |
| DTXSID3020209  | URXBUP     | EPH_E      | 07-08             | Butyl paraben                 | 94-26-8     | Urine | 150    | ng/mL | no                     |
| DTXSID3020209  | URXBUP     | EPHPP_H    | 13-14             | Butyl paraben                 | 94-26-8     | Urine | 150    | ng/mL | no                     |
| DTXSID3020209  | URXBUP     | EPH_D      | 05-06             | Butyl paraben                 | 94-26-8     | Urine | 150    | ng/mL | no                     |
| DTXSID3020209  | URXBUP     | EPH_F      | 09-10             | Butyl paraben                 | 94-26-8     | Urine | 150    | ng/mL | no                     |
| DTXSID3020209  | URXBUP     | EPH_G      | 11-12             | Butyl paraben                 | 94-26-8     | Urine | 150    | ng/mL | no                     |
| DTXSID40873159 | URXCB3     | UPHOPM_F   | 09-10             | cis-3-(2,2-dibromovinyl)-2,2- | 53179-78-5  | Urine | 150    | ug/L  | yes                    |
| DTXSID40873159 | URXCB3     | LAB26PP    | 99-00             | cis-3-(2,2-dibromovinyl)-2,2- | 53179-78-5  | Urine | 150    | ug/L  | no                     |
| DTXSID40873159 | URXCB3     | I26PP_B    | 01-02             | cis-3-(2,2-dibromovinyl)-2,2- | 53179-78-5  | Urine | 150    | ug/L  | no                     |
| DTXSID40873159 | URXCB3     | UPHOPM_E   | 07-08             | cis-3-(2,2-dibromovinyl)-2,2- | 53179-78-5  | Urine | 150    | ug/L  | no                     |

| DTXSID         | NHANEScode | NHANESfile | recent_sa<br>mple | Name                           | CAS          | Media | MaxAge | units | Most_recent<br>_cohort |
|----------------|------------|------------|-------------------|--------------------------------|--------------|-------|--------|-------|------------------------|
| DTXSID2027414  | URXCBF     | L26UPP_C   | 03-04             | Carbofuranphenol               | 1563-38-8    | Urine | 150    | ug/L  | yes                    |
| DTXSID2027414  | URXCBF     | LAB26PP    | 99-00             | Carbofuranphenol               | 1563-38-8    | Urine | 150    | ug/L  | no                     |
| DTXSID2027414  | URXCBF     | I26PP_B    | 01-02             | Carbofuranphenol               | 1563-38-8    | Urine | 150    | ug/L  | no                     |
| DTXSID5028039  | URXCCC     | LAB26PP    | 99-00             | cis-3-(2,2-Dichlorovinyl)-2,2- | 55701-05-8   | Urine | 150    | ug/L  | no                     |
| DTXSID5028039  | URXCCC     | I26PP_B    | 01-02             | cis-3-(2,2-Dichlorovinyl)-2,2- | 55701-05-8   | Urine | 150    | ug/L  | yes                    |
| DTXSID60966198 | URXCEM     | SSUVOC_D   | 05-06             | N-Acetyl-S-(2-carboxyethyl)-I  | 51868-61-2   | Urine | 150    | ng/mL | no                     |
| DTXSID60966198 | URXCEM     | UVOC_H     | 13-14             | N-Acetyl-S-(2-carboxyethyl)-I  | 51868-61-2   | Urine | 150    | ng/mL | no                     |
| DTXSID60966198 | URXCEM     | UVOC_G     | 11-12             | N-Acetyl-S-(2-carboxyethyl)-I  | 51868-61-2   | Urine | 150    | ng/mL | no                     |
| DTXSID60966198 | URXCEM     | UVOC_I     | 15-16             | N-Acetyl-S-(2-carboxyethyl)-I  | 51868-61-2   | Urine | 150    | ng/mL | yes                    |
| DTXSID7023980  | URXCHS     | UPP_E      | 07-08             | Chlorsulfuron                  | 64902-72-3   | Urine | 150    | ug/L  | yes                    |
| DTXSID7023980  | URXCHS     | UPP_D      | 05-06             | Chlorsulfuron                  | 64902-72-3   | Urine | 150    | ug/L  | no                     |
| DTXSID7023980  | URXCHS     | L26UPP_C   | 03-04             | Chlorsulfuron                  | 64902-72-3   | Urine | 150    | ug/L  | no                     |
| DTXSID60873156 | URXCNP     | PHTHTE_G   | 11-12             | Monocarboxynonyl phthalat      | 1373125-93-9 | Urine | 150    | ng/mL | no                     |
| DTXSID60873156 | URXCNP     | PHTHTE_H   | 13-14             | Monocarboxynonyl phthalat      | 1373125-93-9 | Urine | 150    | ng/mL | no                     |
| DTXSID60873156 | URXCNP     | PHTHTE_E   | 07-08             | Monocarboxynonyl phthalat      | 1373125-93-9 | Urine | 150    | ng/mL | no                     |
| DTXSID60873156 | URXCNP     | PHTHTE_F   | 09-10             | Monocarboxynonyl phthalat      | 1373125-93-9 | Urine | 150    | ng/mL | no                     |
| DTXSID60873156 | URXCNP     | PHTHTE_I   | 15-16             | Monocarboxynonyl phthalat      | 1373125-93-9 | Urine | 150    | ng/mL | yes                    |
| DTXSID60873156 | URXCNP     | PHTHTE_D   | 05-06             | Monocarboxynonyl phthalat      | 1373125-93-9 | Urine | 150    | ng/mL | no                     |
|                | URXCOP     | PHTHTE_F   | 09-10             | Mono-(carboxyoctyl) phthalat   | 1923895-92-4 | Urine | 150    | ng/mL | no                     |
|                | URXCOP     | PHTHTE_E   | 07-08             | Mono-(carboxyoctyl) phthalat   | 1923895-92-4 | Urine | 150    | ng/mL | no                     |
|                | URXCOP     | PHTHTE_D   | 05-06             | Mono-(carboxyoctyl) phthalat   | 1923895-92-4 | Urine | 150    | ng/mL | no                     |
|                | URXCOP     | PHTHTE_G   | 11-12             | Mono-(carboxyoctyl) phthalat   | 1923895-92-4 | Urine | 150    | ng/mL | no                     |
|                | URXCOP     | PHTHTE_H   | 13-14             | Mono-(carboxyoctyl) phthalat   | 1923895-92-4 | Urine | 150    | ng/mL | no                     |
|                | URXCOP     | PHTHTE_I   | 15-16             | Mono-(carboxyoctyl) phthalat   | 1923895-92-4 | Urine | 150    | ng/mL | yes                    |
| DTXSID7038317  | URXCPM     | I26PP_B    | 01-02             | 3,5,6-Trichloro-2-pyridinol    | 6515-38-4    | Urine | 150    | ug/L  | no                     |
| DTXSID7038317  | URXCPM     | LAB26PP    | 99-00             | 3,5,6-Trichloro-2-pyridinol    | 6515-38-4    | Urine | 150    | ug/L  | no                     |
| DTXSID7038317  | URXCPM     | UPHOPM_F   | 09-10             | 3,5,6-Trichloro-2-pyridinol    | 6515-38-4    | Urine | 150    | ug/L  | no                     |
| DTXSID7038317  | URXCPM     | UPHOPM_H   | 13-14             | 3,5,6-Trichloro-2-pyridinol    | 6515-38-4    | Urine | 150    | ug/L  | yes                    |
| DTXSID7038317  | URXCPM     | UPHOPM_E   | 07-08             | 3,5,6-Trichloro-2-pyridinol    | 6515-38-4    | Urine | 150    | ug/L  | no                     |
| DTXSID70996027 | URXCYM     | UVOC_H     | 13-14             | S-(2-Cyanoethyl)-N-(1-hydro:   | 74514-75-3   | Urine | 150    | ng/mL | no                     |
| DTXSID70996027 | URXCYM     | SSUVOC_D   | 05-06             | S-(2-Cyanoethyl)-N-(1-hydro:   | 74514-75-3   | Urine | 150    | ng/mL | no                     |
| DTXSID70996027 | URXCYM     | UVOC_G     | 11-12             | S-(2-Cyanoethyl)-N-(1-hydro:   | 74514-75-3   | Urine | 150    | ng/mL | no                     |
| DTXSID70996027 | URXCYM     | UVOC_I     | 15-16             | S-(2-Cyanoethyl)-N-(1-hydro:   | 74514-75-3   | Urine | 150    | ng/mL | yes                    |
| DTXSID9022310  | URXDAZ     | PHYTO_E    | 07-08             | Daidzein                       | 486-66-8     | Urine | 150    | ng/mL | no                     |
| DTXSID9022310  | URXDAZ     | PHYTO_D    | 05-06             | Daidzein                       | 486-66-8     | Urine | 150    | ng/mL | no                     |
| DTXSID9022310  | URXDAZ     | PHYTO_F    | 09-10             | Daidzein                       | 486-66-8     | Urine | 150    | ng/mL | yes                    |
| DTXSID9022310  | URXDAZ     | L06PHY_C   | 03-04             | Daidzein                       | 486-66-8     | Urine | 150    | ng/mL | no                     |
| DTXSID9022310  | URXDAZ     | PHPYPA_B   | 01-02             | Daidzein                       | 486-66-8     | Urine | 150    | ng/mL | no                     |
| DTXSID9022310  | URXDAZ     | PHPYPA     | 99-00             | Daidzein                       | 486-66-8     | Urine | 150    | ng/mL | no                     |
| DTXSID1020439  | URXDCEB    | PP_F       | 09-10             | 2,4-Dichlorophenol             | 120-83-2     | Urine | 150    | ug/L  | no                     |
| DTXSID1020439  | URXDCEB    | L24PP_C    | 03-04             | 2,4-Dichlorophenol             | 120-83-2     | Urine | 150    | ug/L  | no                     |
| DTXSID1020439  | URXDCEB    | PP_D       | 05-06             | 2,4-Dichlorophenol             | 120-83-2     | Urine | 150    | ug/L  | no                     |
| DTXSID1020439  | URXDCEB    | PP_E       | 07-08             | 2,4-Dichlorophenol             | 120-83-2     | Urine | 150    | ug/L  | no                     |
| DTXSID1020439  | URXDCEB    | PP_G       | 11-12             | 2,4-Dichlorophenol             | 120-83-2     | Urine | 150    | ug/L  | no                     |

| DTXSID         | NHANEScode | NHANESfile | recent_sa<br>mple | Name                                   | CAS         | Media | MaxAge | units | Most_recent<br>_cohort |
|----------------|------------|------------|-------------------|----------------------------------------|-------------|-------|--------|-------|------------------------|
| DTXSID1020439  | URXDCEB    | EPHPP_H    | 13-14             | 2,4-Dichlorophenol                     | 120-83-2    | Urine | 150    | ug/L  | no                     |
| DTXSID1020439  | URXDCEB    | EPHPP_I    | 15-16             | 2,4-Dichlorophenol                     | 120-83-2    | Urine | 150    | ng/mL | yes                    |
|                | URXDEA     | DEET_I     | 15-16             | 3-(Diethylcarbamoyl) benzoi            | 858981-15-4 | Urine | 150    | ng/mL | yes                    |
|                | URXDEA     | DEET_H     | 13-14             | 3-(Diethylcarbamoyl) benzoi            | 858981-15-4 | Urine | 150    | ug/L  | no                     |
|                | URXDEA     | DEET_F     | 09-10             | 3-(Diethylcarbamoyl) benzoi            | 858981-15-4 | Urine | 150    | ug/L  | no                     |
|                | URXDEA     | DEET_G     | 11-12             | 3-(Diethylcarbamoyl) benzoi            | 858981-15-4 | Urine | 150    | ug/L  | no                     |
|                | URXDEA     | DEET_E     | 07-08             | 3-(Diethylcarbamoyl) benzoi            | 858981-15-4 | Urine | 150    | ug/L  | no                     |
| DTXSID2021995  | URXDEE     | DEET_H     | 13-14             | DEET                                   | 134-62-3    | Urine | 150    | ug/L  | yes                    |
| DTXSID2021995  | URXDEE     | LAB26PP    | 99-00             | DEET                                   | 134-62-3    | Urine | 150    | ug/L  | no                     |
| DTXSID2021995  | URXDEE     | DEET_E     | 07-08             | DEET                                   | 134-62-3    | Urine | 150    | ug/L  | no                     |
| DTXSID2021995  | URXDEE     | DEET_F     | 09-10             | DEET                                   | 134-62-3    | Urine | 150    | ug/L  | no                     |
| DTXSID2021995  | URXDEE     | DEET_G     | 11-12             | DEET                                   | 134-62-3    | Urine | 150    | ug/L  | no                     |
| DTXSID2021995  | URXDEE     | I26PP_B    | 01-02             | DEET                                   | 134-62-3    | Urine | 150    | ug/L  | no                     |
| DTXSID60932439 | URXDHB     | UVOC_G     | 11-12             | S-(3,4-Dihydroxybutyl)-N-(1-           | 144889-50-9 | Urine | 150    | ng/mL | no                     |
| DTXSID60932439 | URXDHB     | UVOC_H     | 13-14             | S-(3,4-Dihydroxybutyl)-N-(1-           | 144889-50-9 | Urine | 150    | ng/mL | no                     |
| DTXSID60932439 | URXDHB     | UVOC_I     | 15-16             | S-(3,4-Dihydroxybutyl)-N-(1-           | 144889-50-9 | Urine | 150    | ng/mL | yes                    |
| DTXSID60932439 | URXDHB     | SSUVOC_D   | 05-06             | S-(3,4-Dihydroxybutyl)-N-(1-           | 144889-50-9 | Urine | 150    | ng/mL | no                     |
| DTXSID70222550 | URXDHD     | DEET_H     | 13-14             | N,N-Diethyl-3-(hydroxymeth             | 72236-22-7  | Urine | 150    | ug/L  | yes                    |
| DTXSID70222550 | URXDHD     | DEET_G     | 11-12             | N,N-Diethyl-3-(hydroxymeth             | 72236-22-7  | Urine | 150    | ug/L  | no                     |
| DTXSID70222550 | URXDHD     | DEET_E     | 07-08             | N,N-Diethyl-3-(hydroxymeth             | 72236-22-7  | Urine | 150    | ug/L  | no                     |
| DTXSID70222550 | URXDHD     | DEET_F     | 09-10             | N,N-Diethyl-3-(hydroxymeth             | 72236-22-7  | Urine | 150    | ug/L  | no                     |
| DTXSID40873154 | URXDMA     | PHPYPA_B   | 01-02             | O-Desmethylangolensin                  | 21255-69-6  | Urine | 150    | ng/mL | no                     |
| DTXSID40873154 | URXDMA     | L06PHY_C   | 03-04             | O-Desmethylangolensin                  | 21255-69-6  | Urine | 150    | ng/mL | no                     |
| DTXSID40873154 | URXDMA     | PHYTO_D    | 05-06             | O-Desmethylangolensin                  | 21255-69-6  | Urine | 150    | ng/mL | no                     |
| DTXSID40873154 | URXDMA     | PHYTO_F    | 09-10             | O-Desmethylangolensin                  | 21255-69-6  | Urine | 150    | ng/mL | yes                    |
| DTXSID40873154 | URXDMA     | PHPYPA     | 99-00             | O-Desmethylangolensin                  | 21255-69-6  | Urine | 150    | ng/mL | no                     |
| DTXSID40873154 | URXDMA     | PHYTO_E    | 07-08             | O-Desmethylangolensin                  | 21255-69-6  | Urine | 150    | ng/mL | no                     |
|                | URXDPM     | UVOC_I     | 15-16             | N-Acetyl-S-(dimethylphenyl)-L-cysteine |             | Urine | NA     | ng/mL | yes                    |
|                | URXDPM     | SSUVOC_D   | 05-06             | N-Acetyl-S-(dimethylphenyl)-L-cysteine |             | Urine | NA     | ng/mL | no                     |
|                | URXDPM     | UVOC_G     | 11-12             | N-Acetyl-S-(dimethylphenyl)-L-cysteine |             | Urine | NA     | ng/mL | no                     |
|                | URXDPM     | UVOC_H     | 13-14             | N-Acetyl-S-(dimethylphenyl)-L-cysteine |             | Urine | NA     | ng/mL | no                     |
| DTXSID5037494  | URXDTZ     | UAM_E      | 07-08             | Deethylatrazine                        | 6190-65-4   | Urine | NA     | ug/L  | yes                    |
| DTXSID20873152 | URXECP     | PHTHTE_G   | 11-12             | Mono-(2-ethyl-5-carboxyper             | 40809-41-4  | Urine | 150    | ng/mL | no                     |
| DTXSID20873152 | URXECP     | PHTHTE_E   | 07-08             | Mono-(2-ethyl-5-carboxyper             | 40809-41-4  | Urine | 150    | ng/mL | no                     |
| DTXSID20873152 | URXECP     | PHTHTE_H   | 13-14             | Mono-(2-ethyl-5-carboxyper             | 40809-41-4  | Urine | 150    | ng/mL | no                     |
| DTXSID20873152 | URXECP     | PHTHTE_I   | 15-16             | Mono-(2-ethyl-5-carboxyper             | 40809-41-4  | Urine | 150    | ng/mL | yes                    |
| DTXSID20873152 | URXECP     | L24PH_C    | 03-04             | Mono-(2-ethyl-5-carboxyper             | 40809-41-4  | Urine | 150    | ng/mL | no                     |
| DTXSID20873152 | URXECP     | PHTHTE_F   | 09-10             | Mono-(2-ethyl-5-carboxyper             | 40809-41-4  | Urine | 150    | ng/mL | no                     |
| DTXSID20873152 | URXECP     | PHTHTE_D   | 05-06             | Mono-(2-ethyl-5-carboxyper             | 40809-41-4  | Urine | 150    | ng/mL | no                     |
| DTXSID9034573  | URXEMM     | UPP_D      | 05-06             | Ethametsulfuron-methyl                 | 97780-06-8  | Urine | 150    | ug/L  | no                     |
| DTXSID9034573  | URXEMM     | L26UPP_C   | 03-04             | Ethametsulfuron-methyl                 | 97780-06-8  | Urine | 150    | ug/L  | no                     |
| DTXSID9034573  | URXEMM     | UPP_E      | 07-08             | Ethametsulfuron-methyl                 | 97780-06-8  | Urine | 150    | ug/L  | yes                    |
| DTXSID9022528  | URXEPB     | EPH_E      | 07-08             | Ethyl paraben                          | 120-47-8    | Urine | 150    | ng/mL | no                     |
| DTXSID9022528  | URXEPB     | EPH_G      | 11-12             | Ethyl paraben                          | 120-47-8    | Urine | 150    | ng/mL | no                     |

| DTXSID         | NHANEScode | NHANESfile | recent_sa<br>mple | Name                         | CAS         | Media | MaxAge | units | Most_recent<br>_cohort |
|----------------|------------|------------|-------------------|------------------------------|-------------|-------|--------|-------|------------------------|
| DTXSID9022528  | URXEPB     | EPHPP_H    | 13-14             | Ethyl paraben                | 120-47-8    | Urine | 150    | ng/mL | no                     |
| DTXSID9022528  | URXEPB     | EPHPP_I    | 15-16             | Ethyl paraben                | 120-47-8    | Urine | 150    | ng/mL | yes                    |
| DTXSID9022528  | URXEPB     | EPH_D      | 05-06             | Ethyl paraben                | 120-47-8    | Urine | 150    | ng/mL | no                     |
| DTXSID9022528  | URXEPB     | EPH_F      | 09-10             | Ethyl paraben                | 120-47-8    | Urine | 150    | ng/mL | no                     |
| DTXSID0022309  | URXEQU     | PHPYPA_B   | 01-02             | Equol                        | 531-95-3    | Urine | 150    | ng/mL | no                     |
| DTXSID0022309  | URXEQU     | PHYTO_E    | 07-08             | Equol                        | 531-95-3    | Urine | 150    | ng/mL | no                     |
| DTXSID0022309  | URXEQU     | PHYTO_F    | 09-10             | Equol                        | 531-95-3    | Urine | 150    | ng/mL | yes                    |
| DTXSID0022309  | URXEQU     | L06PHY_C   | 03-04             | Equol                        | 531-95-3    | Urine | 150    | ng/mL | no                     |
| DTXSID0022309  | URXEQU     | PHYTO_D    | 05-06             | Equol                        | 531-95-3    | Urine | 150    | ng/mL | no                     |
| DTXSID0022309  | URXEQU     | PHPYPA     | 99-00             | Equol                        | 531-95-3    | Urine | 150    | ng/mL | no                     |
| DTXSID0047876  | URXETD     | L06PHY_C   | 03-04             | Enterodiol                   | 80226-00-2  | Urine | 150    | ng/mL | no                     |
| DTXSID0047876  | URXETD     | PHPYPA_B   | 01-02             | Enterodiol                   | 80226-00-2  | Urine | 150    | ng/mL | no                     |
| DTXSID0047876  | URXETD     | PHYTO_F    | 09-10             | Enterodiol                   | 80226-00-2  | Urine | 150    | ng/mL | yes                    |
| DTXSID0047876  | URXETD     | PHPYPA     | 99-00             | Enterodiol                   | 80226-00-2  | Urine | 150    | ng/mL | no                     |
| DTXSID0047876  | URXETD     | PHYTO_E    | 07-08             | Enterodiol                   | 80226-00-2  | Urine | 150    | ng/mL | no                     |
| DTXSID0047876  | URXETD     | PHYTO_D    | 05-06             | Enterodiol                   | 80226-00-2  | Urine | 150    | ng/mL | no                     |
| -              | URXETL     | PHYTO_E    | 07-08             | Enterolactone                | 77756-20-8  | Urine | 150    | ng/mL | no                     |
| -              | URXETL     | PHPYPA_B   | 01-02             | Enterolactone                | 77756-20-8  | Urine | 150    | ng/mL | no                     |
| -              | URXETL     | L06PHY_C   | 03-04             | Enterolactone                | 77756-20-8  | Urine | 150    | ng/mL | no                     |
| -              | URXETL     | PHPYPA     | 99-00             | Enterolactone                | 77756-20-8  | Urine | 150    | ng/mL | no                     |
| -              | URXETL     | PHYTO_F    | 09-10             | Enterolactone                | 77756-20-8  | Urine | 150    | ng/mL | yes                    |
| -              | URXETL     | PHYTO_D    | 05-06             | Enterolactone                | 77756-20-8  | Urine | 150    | ng/mL | no                     |
| DTXSID5020601  | URXETU     | CARB_E     | 07-08             | Ethylene thiourea            | 96-45-7     | Urine | 150    | ug/L  | yes                    |
| DTXSID5020601  | URXETU     | CARB_D     | 05-06             | Ethylene thiourea            | 96-45-7     | Urine | 150    | ug/L  | no                     |
| DTXSID5020601  | URXETU     | L26UPP_C   | 03-04             | Ethylene thiourea            | 96-45-7     | Urine | 150    | ug/L  | no                     |
| DTXSID7034753  | URXFRM     | L26UPP_C   | 03-04             | Foramsulfuron                | 173159-57-4 | Urine | 150    | ug/L  | no                     |
| DTXSID7034753  | URXFRM     | UPP_D      | 05-06             | Foramsulfuron                | 173159-57-4 | Urine | 150    | ug/L  | no                     |
| DTXSID7034753  | URXFRM     | UPP_E      | 07-08             | Foramsulfuron                | 173159-57-4 | Urine | 150    | ug/L  | yes                    |
| DTXSID30920489 | URXGAM     | UVOC_H     | 13-14             | N-Acetyl-S-(3-amino-3-oxopr  | 81690-92-8  | Urine | 150    | ng/mL | no                     |
| DTXSID30920489 | URXGAM     | UVOC_I     | 15-16             | N-Acetyl-S-(3-amino-3-oxopr  | 81690-92-8  | Urine | 150    | ng/mL | yes                    |
| DTXSID30920489 | URXGAM     | UVOC_G     | 11-12             | N-Acetyl-S-(3-amino-3-oxopr  | 81690-92-8  | Urine | 150    | ng/mL | no                     |
| DTXSID30920489 | URXGAM     | SSUVOC_D   | 05-06             | N-Acetyl-S-(3-amino-3-oxopr  | 81690-92-8  | Urine | 150    | ng/mL | no                     |
| DTXSID5020657  | URXGLP1    | HCAA_H     | 13-14             | 2-Amino-6-methyldipyrido[1   | 67730-11-4  | Urine | NA     | pg/mL | yes                    |
| DTXSID0020658  | URXGLP2    | HCAA_H     | 13-14             | 2-Aminodipyrido[1,2-a:3',2'- | 67730-10-3  | Urine | NA     | pg/mL | yes                    |
| DTXSID5022308  | URXGNS     | PHYTO_F    | 09-10             | Genistein                    | 446-72-0    | Urine | 150    | ng/mL | yes                    |
| DTXSID5022308  | URXGNS     | PHPYPA     | 99-00             | Genistein                    | 446-72-0    | Urine | 150    | ng/mL | no                     |
| DTXSID5022308  | URXGNS     | PHYTO_D    | 05-06             | Genistein                    | 446-72-0    | Urine | 150    | ng/mL | no                     |
| DTXSID5022308  | URXGNS     | PHYTO_E    | 07-08             | Genistein                    | 446-72-0    | Urine | 150    | ng/mL | no                     |
| DTXSID5022308  | URXGNS     | PHPYPA_B   | 01-02             | Genistein                    | 446-72-0    | Urine | 150    | ng/mL | no                     |
| DTXSID5022308  | URXGNS     | L06PHY_C   | 03-04             | Genistein                    | 446-72-0    | Urine | 150    | ng/mL | no                     |
| DTXSID00914077 | URXHEM     | UVOC_H     | 13-14             | N-Acetyl-S-(2-hydroxyethyl)- | 15060-26-1  | Urine | 150    | ng/mL | no                     |
| DTXSID00914077 | URXHEM     | UVOC_I     | 15-16             | N-Acetyl-S-(2-hydroxyethyl)- | 15060-26-1  | Urine | 150    | ng/mL | yes                    |
| DTXSID00914077 | URXHEM     | SSUVOC_D   | 05-06             | N-Acetyl-S-(2-hydroxyethyl)- | 15060-26-1  | Urine | 150    | ng/mL | no                     |
| DTXSID00914077 | URXHEM     | UVOC_G     | 11-12             | N-Acetyl-S-(2-hydroxyethyl)- | 15060-26-1  | Urine | 150    | ng/mL | no                     |

| DTXSID         | NHANEScode | NHANESfile | recent_sa<br>mple | Name                           | CAS         | Media | MaxAge | units | Most_recent<br>_cohort |
|----------------|------------|------------|-------------------|--------------------------------|-------------|-------|--------|-------|------------------------|
| DTXSID70794808 | URXHIBP    | PHTHTE_I   | 15-16             | Mono-2-methyl-2-hydroxypr      | 64339-39-5  | Urine | 150    | ng/mL | no                     |
| DTXSID3074947  | URXHLS     | UPP_E      | 07-08             | Halosulfuron                   | 135397-30-7 | Urine | 150    | ug/L  | yes                    |
| DTXSID3074947  | URXHLS     | UPP_D      | 05-06             | Halosulfuron                   | 135397-30-7 | Urine | 150    | ug/L  | no                     |
| DTXSID3074947  | URXHLS     | L26UPP_C   | 03-04             | Halosulfuron                   | 135397-30-7 | Urine | 150    | ug/L  | no                     |
| DTXSID80197568 | URXHM      | HCAA_H     | 13-14             | 1-Methyl-9H-pyrido[3,4-b]in    | 486-84-0    | Urine | 150    | pg/mL | yes                    |
| DTXSID50919259 | URXHP2     | UVOC_G     | 11-12             | N-Acetyl-S-(2-hydroxypropyl)   | 923-43-3    | Urine | 150    | ng/mL | no                     |
| DTXSID50919259 | URXHP2     | UVOC_H     | 13-14             | N-Acetyl-S-(2-hydroxypropyl)   | 923-43-3    | Urine | 150    | ng/mL | no                     |
| DTXSID50919259 | URXHP2     | SSUVOC_D   | 05-06             | N-Acetyl-S-(2-hydroxypropyl)   | 923-43-3    | Urine | 150    | ng/mL | no                     |
| DTXSID50919259 | URXHP2     | UVOC_I     | 15-16             | N-Acetyl-S-(2-hydroxypropyl)   | 923-43-3    | Urine | 150    | ng/mL | yes                    |
| DTXSID30904325 | URXHPM     | SSUVOC_D   | 05-06             | S-(3-Hydroxypropyl)cysteine    | 23127-40-4  | Urine | 150    | ng/mL | no                     |
| DTXSID30904325 | URXHPM     | UVOC_G     | 11-12             | S-(3-Hydroxypropyl)cysteine    | 23127-40-4  | Urine | 150    | ng/mL | no                     |
| DTXSID30904325 | URXHPM     | UVOC_I     | 15-16             | S-(3-Hydroxypropyl)cysteine    | 23127-40-4  | Urine | 150    | ng/mL | yes                    |
| DTXSID30904325 | URXHPM     | UVOC_H     | 13-14             | S-(3-Hydroxypropyl)cysteine    | 23127-40-4  | Urine | 150    | ng/mL | no                     |
| DTXSID4020745  | URXIQ      | HCAA_H     | 13-14             | 2-Amino-3-methyl-3H-imida:     | 76180-96-6  | Urine | NA     | pg/mL | yes                    |
| DTXSID5043766  | URXMAAC    | HCAA_H     | 13-14             | 2-Amino-3-methyl-9H-pyrioc     | 68006-83-7  | Urine | 150    | pg/mL | yes                    |
| DTXSID6023234  | URXMAD     | SSUVOC_D   | 05-06             | Mandelic Acid                  | 90-64-2     | Urine | 150    | ng/mL | no                     |
| DTXSID6023234  | URXMAD     | UVOC_G     | 11-12             | Mandelic Acid                  | 90-64-2     | Urine | 150    | ng/mL | no                     |
| DTXSID6023234  | URXMAD     | UVOC_I     | 15-16             | Mandelic Acid                  | 90-64-2     | Urine | 150    | ng/mL | yes                    |
| DTXSID6023234  | URXMAD     | UVOC_H     | 13-14             | Mandelic Acid                  | 90-64-2     | Urine | 150    | ng/mL | no                     |
| DTXSID7052739  | URXMAL     | UPHOPM_E   | 07-08             | Malathion diacid               | 1190-28-9   | Urine | 150    | ug/L  | no                     |
| DTXSID7052739  | URXMAL     | UPHOPM_F   | 09-10             | Malathion diacid               | 1190-28-9   | Urine | 150    | ug/L  | yes                    |
| DTXSID7052739  | URXMAL     | LAB26PP    | 99-00             | Malathion diacid               | 1190-28-9   | Urine | 150    | ug/L  | no                     |
| DTXSID70675527 | URXMB2     | UVOC_I     | 15-16             | N-Acetyl-S-(2-hydroxy-3-butyl) | 159092-64-5 | Urine | 150    | ng/mL | yes                    |
| DTXSID70675527 | URXMB2     | UVOC_H     | 13-14             | N-Acetyl-S-(2-hydroxy-3-butyl) | 159092-64-5 | Urine | 150    | ng/mL | no                     |
| DTXSID70675527 | URXMB2     | UVOC_G     | 11-12             | N-Acetyl-S-(2-hydroxy-3-butyl) | 159092-64-5 | Urine | 150    | ng/mL | no                     |
| DTXSID70675527 | URXMB2     | SSUVOC_D   | 05-06             | N-Acetyl-S-(2-hydroxy-3-butyl) | 159092-64-5 | Urine | 150    | ng/mL | no                     |
| -              | URXMB3     | UVOC_H     | 13-14             | N-Acetyl-S-(4-hydroxy-2-butyl) | 159092-65-6 | Urine | 150    | ng/mL | no                     |
| -              | URXMB3     | SSUVOC_D   | 05-06             | N-Acetyl-S-(4-hydroxy-2-butyl) | 159092-65-6 | Urine | 150    | ng/mL | no                     |
| -              | URXMB3     | UVOC_G     | 11-12             | N-Acetyl-S-(4-hydroxy-2-butyl) | 159092-65-6 | Urine | 150    | ng/mL | no                     |
| -              | URXMB3     | UVOC_I     | 15-16             | N-Acetyl-S-(4-hydroxy-2-butyl) | 159092-65-6 | Urine | 150    | ng/mL | yes                    |
| DTXSID4040002  | URXMBP     | L24PH_C    | 03-04             | Mono-n-butyl phthalate (Mn     | 131-70-4    | Urine | 150    | ng/mL | no                     |
| DTXSID4040002  | URXMBP     | PHPYPA     | 99-00             | Mono-n-butyl phthalate (Mn     | 131-70-4    | Urine | 150    | ng/mL | no                     |
| DTXSID4040002  | URXMBP     | PHPYPA_B   | 01-02             | Mono-n-butyl phthalate (Mn     | 131-70-4    | Urine | 150    | ng/mL | no                     |
| DTXSID4040002  | URXMBP     | PHTHTE_D   | 05-06             | Mono-n-butyl phthalate (Mn     | 131-70-4    | Urine | 150    | ng/mL | no                     |
| DTXSID4040002  | URXMBP     | PHTHTE_G   | 11-12             | Mono-n-butyl phthalate (Mn     | 131-70-4    | Urine | 150    | ng/mL | no                     |
| DTXSID4040002  | URXMBP     | PHTHTE_H   | 13-14             | Mono-n-butyl phthalate (Mn     | 131-70-4    | Urine | 150    | ng/mL | no                     |
| DTXSID4040002  | URXMBP     | PHTHTE_E   | 07-08             | Mono-n-butyl phthalate (Mn     | 131-70-4    | Urine | 150    | ng/mL | no                     |
| DTXSID4040002  | URXMBP     | PHTHTE_F   | 09-10             | Mono-n-butyl phthalate (Mn     | 131-70-4    | Urine | 150    | ng/mL | no                     |
| DTXSID4040002  | URXMBP     | PHTHTE_I   | 15-16             | Mono-n-butyl phthalate (Mn     | 131-70-4    | Urine | 150    | ng/mL | yes                    |
| DTXSID3052729  | URXMC1     | L24PH_C    | 03-04             | Mono-(3-carboxypropyl) pht     | 66851-46-5  | Urine | 150    | ng/mL | no                     |
| DTXSID3052729  | URXMC1     | PHTHTE_I   | 15-16             | Mono-(3-carboxypropyl) pht     | 66851-46-5  | Urine | 150    | ng/mL | yes                    |
| DTXSID3052729  | URXMC1     | PHTHTE_F   | 09-10             | Mono-(3-carboxypropyl) pht     | 66851-46-5  | Urine | 150    | ng/mL | no                     |
| DTXSID3052729  | URXMC1     | PHTHTE_H   | 13-14             | Mono-(3-carboxypropyl) pht     | 66851-46-5  | Urine | 150    | ng/mL | no                     |
| DTXSID3052729  | URXMC1     | PHTHTE_D   | 05-06             | Mono-(3-carboxypropyl) pht     | 66851-46-5  | Urine | 150    | ng/mL | no                     |





| DTXSID         | NHANEScode | NHANESfile | recent_sa<br>mple | Name                                   | CAS         | Media | MaxAge | units | Most_recent<br>_cohort |
|----------------|------------|------------|-------------------|----------------------------------------|-------------|-------|--------|-------|------------------------|
| DTXSID5052701  | URXMIB     | L24PH_C    | 03-04             | Mono-isobutyl phthalate (Mi 30833-53-5 |             | Urine | 150    | ng/mL | no                     |
| DTXSID5052701  | URXMIB     | PHTHTE_E   | 07-08             | Mono-isobutyl phthalate (Mi 30833-53-5 |             | Urine | 150    | ng/mL | no                     |
| DTXSID5052701  | URXMIB     | PHTHTE_H   | 13-14             | Mono-isobutyl phthalate (Mi 30833-53-5 |             | Urine | 150    | ng/mL | no                     |
| DTXSID5052701  | URXMIB     | PHTHTE_I   | 15-16             | Mono-isobutyl phthalate (Mi 30833-53-5 |             | Urine | 150    | ng/mL | yes                    |
| DTXSID5052701  | URXMIB     | PHTHTE_D   | 05-06             | Mono-isobutyl phthalate (Mi 30833-53-5 |             | Urine | 150    | ng/mL | no                     |
| DTXSID6024177  | URXMMI     | CARB_D     | 05-06             | Methamidophos                          | 10265-92-6  | Urine | 150    | ug/L  | no                     |
| DTXSID6024177  | URXMMI     | CARB_E     | 07-08             | Methamidophos                          | 10265-92-6  | Urine | 150    | ug/L  | yes                    |
| DTXSID6024177  | URXMMI     | L26UPP_C   | 03-04             | Methamidophos                          | 10265-92-6  | Urine | 150    | ug/L  | no                     |
| DTXSID9040001  | URXMNM     | PHTHTE_G   | 11-12             | Mono-methyl phthalate (MN 4376-18-5    |             | Urine | 150    | ng/mL | yes                    |
| DTXSID9040001  | URXMNM     | PHTHTE_F   | 09-10             | Mono-methyl phthalate (MN 4376-18-5    |             | Urine | 150    | ng/mL | no                     |
| DTXSID9040001  | URXMNM     | PHTHTE_E   | 07-08             | Mono-methyl phthalate (MN 4376-18-5    |             | Urine | 150    | ng/mL | no                     |
| DTXSID9040001  | URXMNM     | PHTHTE_D   | 05-06             | Mono-methyl phthalate (MN 4376-18-5    |             | Urine | 150    | ng/mL | no                     |
| DTXSID9040001  | URXMNM     | PHPYPA_B   | 01-02             | Mono-methyl phthalate (MN 4376-18-5    |             | Urine | 150    | ng/mL | no                     |
| DTXSID9040001  | URXMNM     | L24PH_C    | 03-04             | Mono-methyl phthalate (MN 4376-18-5    |             | Urine | 150    | ng/mL | no                     |
|                | URXMNP     | PHTHTE_E   | 07-08             | Mono-isononyl phthalate                | 519056-28-1 | Urine | 150    | ng/mL | no                     |
|                | URXMNP     | PHTHTE_H   | 13-14             | Mono-isononyl phthalate                | 519056-28-1 | Urine | 150    | ng/mL | no                     |
|                | URXMNP     | PHTHTE_G   | 11-12             | Mono-isononyl phthalate                | 519056-28-1 | Urine | 150    | ng/mL | no                     |
|                | URXMNP     | PHTHTE_I   | 15-16             | Mono-isononyl phthalate                | 519056-28-1 | Urine | 150    | ng/mL | yes                    |
|                | URXMNP     | PHTHTE_D   | 05-06             | Mono-isononyl phthalate                | 519056-28-1 | Urine | 150    | ng/mL | no                     |
|                | URXMNP     | PHTHTE_F   | 09-10             | Mono-isononyl phthalate                | 519056-28-1 | Urine | 150    | ng/mL | no                     |
|                | URXMNP     | PHPYPA_B   | 01-02             | Mono-isononyl phthalate                | 519056-28-1 | Urine | 150    | ng/mL | no                     |
|                | URXMNP     | L24PH_C    | 03-04             | Mono-isononyl phthalate                | 519056-28-1 | Urine | 150    | ng/mL | no                     |
|                | URXMNP     | PHPYPA     | 99-00             | Mono-isononyl phthalate                | 519056-28-1 | Urine | 150    | ng/mL | no                     |
| DTXSID00865994 | URXMOH     | PHTHTE_D   | 05-06             | Mono-(2-ethyl-5-oxohexyl) p            | 40321-98-0  | Urine | 150    | ng/mL | no                     |
| DTXSID00865994 | URXMOH     | PHTHTE_G   | 11-12             | Mono-(2-ethyl-5-oxohexyl) p            | 40321-98-0  | Urine | 150    | ng/mL | no                     |
| DTXSID00865994 | URXMOH     | L24PH_C    | 03-04             | Mono-(2-ethyl-5-oxohexyl) p            | 40321-98-0  | Urine | 150    | ng/mL | no                     |
| DTXSID00865994 | URXMOH     | PHTHTE_E   | 07-08             | Mono-(2-ethyl-5-oxohexyl) p            | 40321-98-0  | Urine | 150    | ng/mL | no                     |
| DTXSID00865994 | URXMOH     | PHTHTE_F   | 09-10             | Mono-(2-ethyl-5-oxohexyl) p            | 40321-98-0  | Urine | 150    | ng/mL | no                     |
| DTXSID00865994 | URXMOH     | PHPYPA_B   | 01-02             | Mono-(2-ethyl-5-oxohexyl) p            | 40321-98-0  | Urine | 150    | ng/mL | no                     |
| DTXSID00865994 | URXMOH     | PHTHTE_I   | 15-16             | Mono-(2-ethyl-5-oxohexyl) p            | 40321-98-0  | Urine | 150    | ng/mL | yes                    |
| DTXSID00865994 | URXMOH     | PHTHTE_H   | 13-14             | Mono-(2-ethyl-5-oxohexyl) p            | 40321-98-0  | Urine | 150    | ng/mL | no                     |
| DTXSID4052714  | URXMOP     | PHPYPA     | 99-00             | Mono-n-octyl phthalate (MO 5393-19-1   |             | Urine | 150    | ng/mL | no                     |
| DTXSID4052714  | URXMOP     | L24PH_C    | 03-04             | Mono-n-octyl phthalate (MO 5393-19-1   |             | Urine | 150    | ng/mL | no                     |
| DTXSID4052714  | URXMOP     | PHTHTE_D   | 05-06             | Mono-n-octyl phthalate (MO 5393-19-1   |             | Urine | 150    | ng/mL | no                     |
| DTXSID4052714  | URXMOP     | PHTHTE_E   | 07-08             | Mono-n-octyl phthalate (MO 5393-19-1   |             | Urine | 150    | ng/mL | no                     |
| DTXSID4052714  | URXMOP     | PHPYPA_B   | 01-02             | Mono-n-octyl phthalate (MO 5393-19-1   |             | Urine | 150    | ng/mL | no                     |
| DTXSID4052714  | URXMOP     | PHTHTE_F   | 09-10             | Mono-n-octyl phthalate (MO 5393-19-1   |             | Urine | 150    | ng/mL | yes                    |
| DTXSID4022529  | URXMPB     | EPH_F      | 09-10             | Methyl paraben                         | 99-76-3     | Urine | 150    | ng/mL | no                     |
| DTXSID4022529  | URXMPB     | EPH_D      | 05-06             | Methyl paraben                         | 99-76-3     | Urine | 150    | ng/mL | no                     |
| DTXSID4022529  | URXMPB     | EPH_E      | 07-08             | Methyl paraben                         | 99-76-3     | Urine | 150    | ng/mL | no                     |
| DTXSID4022529  | URXMPB     | EPH_G      | 11-12             | Methyl paraben                         | 99-76-3     | Urine | 150    | ng/mL | no                     |
| DTXSID4022529  | URXMPB     | EPHPP_H    | 13-14             | Methyl paraben                         | 99-76-3     | Urine | 150    | ng/mL | no                     |
| DTXSID4022529  | URXMPB     | EPHPP_I    | 15-16             | Methyl paraben                         | 99-76-3     | Urine | 150    | ng/mL | yes                    |
| DTXSID6034712  | URXMSM     | UPP_E      | 07-08             | Mesosulfuron-methyl                    | 208465-21-8 | Urine | 150    | ug/L  | yes                    |

| DTXSID         | NHANEScode | NHANESfile | recent_sa |                                      | CAS         | Media | MaxAge | units | Most_recent_cohort |
|----------------|------------|------------|-----------|--------------------------------------|-------------|-------|--------|-------|--------------------|
|                |            |            | mple      | Name                                 |             |       |        |       |                    |
| DTXSID6034712  | URXMSM     | UPP_D      | 05-06     | Mesosulfuron-methyl                  | 208465-21-8 | Urine | 150    | ug/L  | no                 |
| DTXSID6034712  | URXMSM     | L26UPP_C   | 03-04     | Mesosulfuron-methyl                  | 208465-21-8 | Urine | 150    | ug/L  | no                 |
| DTXSID6023864  | URXMTM     | UPP_D      | 05-06     | Metsulfuron-methyl                   | 74223-64-6  | Urine | NA     | ug/L  | no                 |
| DTXSID6023864  | URXMTM     | UPP_E      | 07-08     | Metsulfuron-methyl                   | 74223-64-6  | Urine | NA     | ug/L  | yes                |
| DTXSID6023864  | URXMTM     | L26UPP_C   | 03-04     | Metsulfuron-methyl                   | 74223-64-6  | Urine | NA     | ug/L  | no                 |
| DTXSID7020479  | URXMTO     | CARB_D     | 05-06     | Dimethoate                           | 60-51-5     | Urine | 150    | ug/L  | no                 |
| DTXSID7020479  | URXMTO     | L26UPP_C   | 03-04     | Dimethoate                           | 60-51-5     | Urine | 150    | ug/L  | no                 |
| DTXSID7020479  | URXMTO     | CARB_E     | 07-08     | Dimethoate                           | 60-51-5     | Urine | 150    | ug/L  | yes                |
| DTXSID9043938  | URXMZP     | PHTHTE_E   | 07-08     | Mono-benzyl phthalate (MB; 2528-16-7 |             | Urine | 150    | ng/mL | no                 |
| DTXSID9043938  | URXMZP     | PHTHTE_F   | 09-10     | Mono-benzyl phthalate (MB; 2528-16-7 |             | Urine | 150    | ng/mL | no                 |
| DTXSID9043938  | URXMZP     | PHTHTE_G   | 11-12     | Mono-benzyl phthalate (MB; 2528-16-7 |             | Urine | 150    | ng/mL | no                 |
| DTXSID9043938  | URXMZP     | L24PH_C    | 03-04     | Mono-benzyl phthalate (MB; 2528-16-7 |             | Urine | 150    | ng/mL | no                 |
| DTXSID9043938  | URXMZP     | PHTHTE_D   | 05-06     | Mono-benzyl phthalate (MB; 2528-16-7 |             | Urine | 150    | ng/mL | no                 |
| DTXSID9043938  | URXMZP     | PHTHTE_H   | 13-14     | Mono-benzyl phthalate (MB; 2528-16-7 |             | Urine | 150    | ng/mL | no                 |
| DTXSID9043938  | URXMZP     | PHPYPA_B   | 01-02     | Mono-benzyl phthalate (MB; 2528-16-7 |             | Urine | 150    | ng/mL | no                 |
| DTXSID9043938  | URXMZP     | PHTHTE_I   | 15-16     | Mono-benzyl phthalate (MB; 2528-16-7 |             | Urine | 150    | ng/mL | yes                |
| DTXSID9043938  | URXMZP     | PHPYPA     | 99-00     | Mono-benzyl phthalate (MB; 2528-16-7 |             | Urine | 150    | ng/mL | no                 |
| DTXSID2021070  | URXNHM     | HCAA_H     | 13-14     | 9H-Pyrido[3,4-b]indole (Norf         | 244-63-3    | Urine | 150    | pg/mL | yes                |
| DTXSID5024217  | URXNO3     | PERNT_G    | 11-12     | Nitrate                              | 14797-55-8  | Urine | 150    | ng/mL | no                 |
| DTXSID5024217  | URXNO3     | PERNT_F    | 09-10     | Nitrate                              | 14797-55-8  | Urine | 150    | ng/mL | no                 |
| DTXSID5024217  | URXNO3     | PERNT_H    | 13-14     | Nitrate                              | 14797-55-8  | Urine | 150    | ng/mL | no                 |
| DTXSID5024217  | URXNO3     | PERNT_I    | 15-16     | Nitrate                              | 14797-55-8  | Urine | 150    | ng/mL | yes                |
| DTXSID6034764  | URXNOS     | UPP_D      | 05-06     | Nicosulfuron                         | 111991-09-4 | Urine | NA     | ug/L  | no                 |
| DTXSID6034764  | URXNOS     | L26UPP_C   | 03-04     | Nicosulfuron                         | 111991-09-4 | Urine | NA     | ug/L  | no                 |
| DTXSID6034764  | URXNOS     | UPP_E      | 07-08     | Nicosulfuron                         | 111991-09-4 | Urine | NA     | ug/L  | yes                |
| DTXSID4037580  | URXOMO     | CARB_E     | 07-08     | Omethoate                            | 1113-02-6   | Urine | 150    | ug/L  | yes                |
| DTXSID4037580  | URXOMO     | L26UPP_C   | 03-04     | Omethoate                            | 1113-02-6   | Urine | 150    | ug/L  | no                 |
| DTXSID4037580  | URXOMO     | CARB_D     | 05-06     | Omethoate                            | 1113-02-6   | Urine | 150    | ug/L  | no                 |
| DTXSID5025150  | URXOP1     | OPD_E      | 07-08     | Dimethylphosphate (DMP)              | 813-78-5    | Urine | 150    | ug/L  | no                 |
| DTXSID5025150  | URXOP1     | OPD_D      | 05-06     | Dimethylphosphate (DMP)              | 813-78-5    | Urine | 150    | ug/L  | no                 |
| DTXSID5025150  | URXOP1     | OPD_G      | 11-12     | Dimethylphosphate (DMP)              | 813-78-5    | Urine | 150    | ng/mL | yes                |
| DTXSID5025150  | URXOP1     | I26PP_B    | 01-02     | Dimethylphosphate (DMP)              | 813-78-5    | Urine | 150    | ug/L  | no                 |
| DTXSID5025150  | URXOP1     | LAB26PP    | 99-00     | Dimethylphosphate (DMP)              | 813-78-5    | Urine | 150    | ug/L  | no                 |
| DTXSID5025150  | URXOP1     | L26OPD_C   | 03-04     | Dimethylphosphate (DMP)              | 813-78-5    | Urine | 150    | ug/L  | no                 |
| DTXSID1044699  | URXOP2     | OPD_G      | 11-12     | Diethylphosphate (DEP)               | 598-02-7    | Urine | 150    | ng/mL | yes                |
| DTXSID1044699  | URXOP2     | L26OPD_C   | 03-04     | Diethylphosphate (DEP)               | 598-02-7    | Urine | 150    | ug/L  | no                 |
| DTXSID1044699  | URXOP2     | LAB26PP    | 99-00     | Diethylphosphate (DEP)               | 598-02-7    | Urine | 150    | ug/L  | no                 |
| DTXSID1044699  | URXOP2     | OPD_D      | 05-06     | Diethylphosphate (DEP)               | 598-02-7    | Urine | 150    | ug/L  | no                 |
| DTXSID1044699  | URXOP2     | OPD_E      | 07-08     | Diethylphosphate (DEP)               | 598-02-7    | Urine | 150    | ug/L  | no                 |
| DTXSID1044699  | URXOP2     | I26PP_B    | 01-02     | Diethylphosphate (DEP)               | 598-02-7    | Urine | 150    | ug/L  | no                 |
| DTXSID10858736 | URXOP3     | LAB26PP    | 99-00     | Dimethylthiophosphate (DM            | 1112-38-5   | Urine | 150    | ug/L  | no                 |
| DTXSID10858736 | URXOP3     | I26PP_B    | 01-02     | Dimethylthiophosphate (DM            | 1112-38-5   | Urine | 150    | ug/L  | no                 |
| DTXSID10858736 | URXOP3     | OPD_D      | 05-06     | Dimethylthiophosphate (DM            | 1112-38-5   | Urine | 150    | ug/L  | no                 |
| DTXSID10858736 | URXOP3     | OPD_E      | 07-08     | Dimethylthiophosphate (DM            | 1112-38-5   | Urine | 150    | ug/L  | no                 |

| DTXSID         | NHANEScode | NHANESfile | recent_sa<br>mple | Name                                  | CAS         | Media | MaxAge | units | Most_recent<br>_cohort |
|----------------|------------|------------|-------------------|---------------------------------------|-------------|-------|--------|-------|------------------------|
| DTXSID10858736 | URXOP3     | OPD_G      | 11-12             | Dimethylthiophosphate (DM 1112-38-5   |             | Urine | 150    | ng/mL | yes                    |
| DTXSID10858736 | URXOP3     | L26OPD_C   | 03-04             | Dimethylthiophosphate (DM 1112-38-5   |             | Urine | 150    | ug/L  | no                     |
|                | URXOP4     | L26OPD_C   | 03-04             | Diethylthiophosphate (DETP) 5871-17-0 |             | Urine | 150    | ug/L  | no                     |
|                | URXOP4     | OPD_E      | 07-08             | Diethylthiophosphate (DETP) 5871-17-0 |             | Urine | 150    | ug/L  | no                     |
|                | URXOP4     | OPD_G      | 11-12             | Diethylthiophosphate (DETP) 5871-17-0 |             | Urine | 150    | ng/mL | yes                    |
|                | URXOP4     | LAB26PP    | 99-00             | Diethylthiophosphate (DETP) 5871-17-0 |             | Urine | 150    | ug/L  | no                     |
|                | URXOP4     | I26PP_B    | 01-02             | Diethylthiophosphate (DETP) 5871-17-0 |             | Urine | 150    | ug/L  | no                     |
|                | URXOP4     | OPD_D      | 05-06             | Diethylthiophosphate (DETP) 5871-17-0 |             | Urine | 150    | ug/L  | no                     |
| DTXSID5027306  | URXOP5     | OPD_E      | 07-08             | Dimethyldithiophosphate (DI 756-80-9  |             | Urine | 150    | ug/L  | yes                    |
| DTXSID5027306  | URXOP5     | OPD_G      | 11-12             | Dimethyldithiophosphate (DI 756-80-9  |             | Urine | 150    | ng/mL | no                     |
| DTXSID5027306  | URXOP5     | L26OPD_C   | 03-04             | Dimethyldithiophosphate (DI 756-80-9  |             | Urine | 150    | ug/L  | no                     |
| DTXSID5027306  | URXOP5     | OPD_D      | 05-06             | Dimethyldithiophosphate (DI 756-80-9  |             | Urine | 150    | ug/L  | no                     |
| DTXSID5027306  | URXOP5     | LAB26PP    | 99-00             | Dimethyldithiophosphate (DI 756-80-9  |             | Urine | 150    | ug/L  | no                     |
| DTXSID5027306  | URXOP5     | I26PP_B    | 01-02             | Dimethyldithiophosphate (DI 756-80-9  |             | Urine | 150    | ug/L  | no                     |
| DTXSID6027133  | URXOP6     | OPD_G      | 11-12             | O,O-Diethyl dithiophosphate 298-06-6  |             | Urine | 150    | ng/mL | yes                    |
| DTXSID6027133  | URXOP6     | LAB26PP    | 99-00             | O,O-Diethyl dithiophosphate 298-06-6  |             | Urine | 150    | ug/L  | no                     |
| DTXSID6027133  | URXOP6     | OPD_E      | 07-08             | O,O-Diethyl dithiophosphate 298-06-6  |             | Urine | 150    | ug/L  | no                     |
| DTXSID6027133  | URXOP6     | I26PP_B    | 01-02             | O,O-Diethyl dithiophosphate 298-06-6  |             | Urine | 150    | ug/L  | no                     |
| DTXSID6027133  | URXOP6     | OPD_D      | 05-06             | O,O-Diethyl dithiophosphate 298-06-6  |             | Urine | 150    | ug/L  | no                     |
| DTXSID6027133  | URXOP6     | L26OPD_C   | 03-04             | O,O-Diethyl dithiophosphate 298-06-6  |             | Urine | 150    | ug/L  | no                     |
| DTXSID1038321  | URXOPM     | UPHOPM_F   | 09-10             | 3-phenoxybenzoic acid                 | 3739-38-6   | Urine | 150    | ug/L  | no                     |
| DTXSID1038321  | URXOPM     | UPHOPM_G   | 11-12             | 3-phenoxybenzoic acid                 | 3739-38-6   | Urine | 150    | ug/L  | no                     |
| DTXSID1038321  | URXOPM     | UPHOPM_H   | 13-14             | 3-phenoxybenzoic acid                 | 3739-38-6   | Urine | 150    | ug/L  | yes                    |
| DTXSID1038321  | URXOPM     | LAB26PP    | 99-00             | 3-phenoxybenzoic acid                 | 3739-38-6   | Urine | 150    | ug/L  | no                     |
| DTXSID1038321  | URXOPM     | UPHOPM_E   | 07-08             | 3-phenoxybenzoic acid                 | 3739-38-6   | Urine | 150    | ug/L  | no                     |
| DTXSID1038321  | URXOPM     | I26PP_B    | 01-02             | 3-phenoxybenzoic acid                 | 3739-38-6   | Urine | 150    | ug/L  | no                     |
| DTXSID2021151  | URXOPP     | PP_D       | 05-06             | ortho-Phenylphenol                    | 90-43-7     | Urine | 150    | ug/L  | no                     |
| DTXSID2021151  | URXOPP     | PP_F       | 09-10             | ortho-Phenylphenol                    | 90-43-7     | Urine | 150    | ug/L  | yes                    |
| DTXSID2021151  | URXOPP     | L24PP_C    | 03-04             | ortho-Phenylphenol                    | 90-43-7     | Urine | 150    | ug/L  | no                     |
| DTXSID2021151  | URXOPP     | PP_E       | 07-08             | ortho-Phenylphenol                    | 90-43-7     | Urine | 150    | ug/L  | no                     |
| DTXSID4037580  | URXOXS     | UPP_E      | 07-08             | Oxasulfuron                           | 144651-06-9 | Urine | 150    | ug/L  | yes                    |
| DTXSID4037580  | URXOXS     | L26UPP_C   | 03-04             | Oxasulfuron                           | 144651-06-9 | Urine | 150    | ug/L  | no                     |
| DTXSID4037580  | URXOXS     | UPP_D      | 05-06             | Oxasulfuron                           | 144651-06-9 | Urine | 150    | ug/L  | no                     |
| DTXSID1027502  | URXOXY     | UPHOPM_F   | 09-10             | 2-Isopropyl-6-methyl-4-pyridin-2-yl   | 2814-20-2   | Urine | 150    | ug/L  | no                     |
| DTXSID1027502  | URXOXY     | UPHOPM_E   | 07-08             | 2-Isopropyl-6-methyl-4-pyridin-2-yl   | 2814-20-2   | Urine | 150    | ug/L  | no                     |
| DTXSID1027502  | URXOXY     | UPHOPM_H   | 13-14             | 2-Isopropyl-6-methyl-4-pyridin-2-yl   | 2814-20-2   | Urine | 150    | ug/L  | yes                    |
| DTXSID1027502  | URXOXY     | UPHOPM_G   | 11-12             | 2-Isopropyl-6-methyl-4-pyridin-2-yl   | 2814-20-2   | Urine | 150    | ug/L  | no                     |
| DTXSID6021793  | URXP01     | PAH_G      | 11-12             | 1-Hydroxynaphthalene (1-Nc 90-15-3    |             | Urine | 150    | ng/L  | no                     |
| DTXSID6021793  | URXP01     | PAH_I      | 15-16             | 1-Hydroxynaphthalene (1-Nc 90-15-3    |             | Urine | 150    | ng/L  | yes                    |
| DTXSID6021793  | URXP01     | PAH_F      | 09-10             | 1-Hydroxynaphthalene (1-Nc 90-15-3    |             | Urine | 150    | ng/L  | no                     |
| DTXSID6021793  | URXP01     | PHPYPA_B   | 01-02             | 1-Hydroxynaphthalene (1-Nc 90-15-3    |             | Urine | 150    | ng/L  | no                     |
| DTXSID6021793  | URXP01     | PAH_H      | 13-14             | 1-Hydroxynaphthalene (1-Nc 90-15-3    |             | Urine | 150    | ng/L  | no                     |
| DTXSID6021793  | URXP01     | PAH_E      | 07-08             | 1-Hydroxynaphthalene (1-Nc 90-15-3    |             | Urine | 150    | ng/L  | no                     |
| DTXSID6021793  | URXP01     | L31PAH_C   | 03-04             | 1-Hydroxynaphthalene (1-Nc 90-15-3    |             | Urine | 150    | ng/L  | no                     |

| DTXSID         | NHANEScode | NHANESfile | recent_sa<br>mple | Name                       | CAS       | Media | MaxAge | units | Most_recent<br>_cohort |
|----------------|------------|------------|-------------------|----------------------------|-----------|-------|--------|-------|------------------------|
| DTXSID6021793  | URXP01     | PAH_D      | 05-06             | 1-Hydroxynaphthalene (1-Na | 90-15-3   | Urine | 150    | ng/L  | no                     |
| DTXSID5027061  | URXP02     | PAH_H      | 13-14             | 2-Hydroxynaphthalene (2-Na | 135-19-3  | Urine | 150    | ng/mL | no                     |
| DTXSID5027061  | URXP02     | PAH_I      | 15-16             | 2-Hydroxynaphthalene (2-Na | 135-19-3  | Urine | 150    | ng/mL | yes                    |
| DTXSID5027061  | URXP02     | PAH_F      | 09-10             | 2-Hydroxynaphthalene (2-Na | 135-19-3  | Urine | 150    | ng/mL | no                     |
| DTXSID5027061  | URXP02     | PAH_G      | 11-12             | 2-Hydroxynaphthalene (2-Na | 135-19-3  | Urine | 150    | ng/mL | no                     |
| DTXSID5027061  | URXP02     | PAH_E      | 07-08             | 2-Hydroxynaphthalene (2-Na | 135-19-3  | Urine | 150    | ng/mL | no                     |
| DTXSID5027061  | URXP02     | PAH_D      | 05-06             | 2-Hydroxynaphthalene (2-Na | 135-19-3  | Urine | 150    | ng/mL | no                     |
| DTXSID5027061  | URXP02     | L31PAH_C   | 03-04             | 2-Hydroxynaphthalene (2-Na | 135-19-3  | Urine | 150    | ng/mL | no                     |
| DTXSID5027061  | URXP02     | PHPYPA_B   | 01-02             | 2-Hydroxynaphthalene (2-Na | 135-19-3  | Urine | 150    | ng/mL | no                     |
| DTXSID9047540  | URXP03     | PAH_G      | 11-12             | 3-Hydroxyfluorene          | 6344-67-8 | Urine | 150    | ng/L  | no                     |
| DTXSID9047540  | URXP03     | PAH_E      | 07-08             | 3-Hydroxyfluorene          | 6344-67-8 | Urine | 150    | ng/L  | no                     |
| DTXSID9047540  | URXP03     | PAH_F      | 09-10             | 3-Hydroxyfluorene          | 6344-67-8 | Urine | 150    | ng/L  | no                     |
| DTXSID9047540  | URXP03     | PAH_D      | 05-06             | 3-Hydroxyfluorene          | 6344-67-8 | Urine | 150    | ng/L  | no                     |
| DTXSID9047540  | URXP03     | PAH_I      | 15-16             | 3-Hydroxyfluorene          | 6344-67-8 | Urine | 150    | ng/L  | yes                    |
| DTXSID9047540  | URXP03     | L31PAH_C   | 03-04             | 3-Hydroxyfluorene          | 6344-67-8 | Urine | 150    | ng/L  | no                     |
| DTXSID9047540  | URXP03     | PHPYPA_B   | 01-02             | 3-Hydroxyfluorene          | 6344-67-8 | Urine | 150    | ng/L  | no                     |
| DTXSID9047540  | URXP03     | PAH_H      | 13-14             | 3-Hydroxyfluorene          | 6344-67-8 | Urine | 150    | ng/L  | no                     |
| DTXSID2047569  | URXP04     | PAH_H      | 13-14             | 2-Hydroxyfluorene          | 2443-58-5 | Urine | 150    | ng/L  | no                     |
| DTXSID2047569  | URXP04     | PAH_G      | 11-12             | 2-Hydroxyfluorene          | 2443-58-5 | Urine | 150    | ng/L  | no                     |
| DTXSID2047569  | URXP04     | PAH_D      | 05-06             | 2-Hydroxyfluorene          | 2443-58-5 | Urine | 150    | ng/L  | no                     |
| DTXSID2047569  | URXP04     | PAH_I      | 15-16             | 2-Hydroxyfluorene          | 2443-58-5 | Urine | 150    | ng/L  | yes                    |
| DTXSID2047569  | URXP04     | PAH_F      | 09-10             | 2-Hydroxyfluorene          | 2443-58-5 | Urine | 150    | ng/L  | no                     |
| DTXSID2047569  | URXP04     | PHPYPA_B   | 01-02             | 2-Hydroxyfluorene          | 2443-58-5 | Urine | 150    | ng/L  | no                     |
| DTXSID2047569  | URXP04     | PAH_E      | 07-08             | 2-Hydroxyfluorene          | 2443-58-5 | Urine | 150    | ng/L  | no                     |
| DTXSID2047569  | URXP04     | L31PAH_C   | 03-04             | 2-Hydroxyfluorene          | 2443-58-5 | Urine | 150    | ng/L  | no                     |
| DTXSID3052723  | URXP05     | PHPYPA_B   | 01-02             | 3-Hydroxyphenanthrene      | 605-87-8  | Urine | 150    | ng/L  | no                     |
| DTXSID3052723  | URXP05     | PAH_F      | 09-10             | 3-Hydroxyphenanthrene      | 605-87-8  | Urine | 150    | ng/L  | no                     |
| DTXSID3052723  | URXP05     | L31PAH_C   | 03-04             | 3-Hydroxyphenanthrene      | 605-87-8  | Urine | 150    | ng/L  | no                     |
| DTXSID3052723  | URXP05     | PAH_D      | 05-06             | 3-Hydroxyphenanthrene      | 605-87-8  | Urine | 150    | ng/L  | no                     |
| DTXSID3052723  | URXP05     | PAH_E      | 07-08             | 3-Hydroxyphenanthrene      | 605-87-8  | Urine | 150    | ng/L  | no                     |
| DTXSID3052723  | URXP05     | PAH_G      | 11-12             | 3-Hydroxyphenanthrene      | 605-87-8  | Urine | 150    | ng/L  | yes                    |
| DTXSID90872758 | URXP06     | L31PAH_C   | 03-04             | 1-Hydroxyphenanthrene      | 2433-56-9 | Urine | 150    | ng/L  | no                     |
| DTXSID90872758 | URXP06     | PAH_F      | 09-10             | 1-Hydroxyphenanthrene      | 2433-56-9 | Urine | 150    | ng/L  | no                     |
| DTXSID90872758 | URXP06     | PAH_G      | 11-12             | 1-Hydroxyphenanthrene      | 2433-56-9 | Urine | 150    | ng/L  | no                     |
| DTXSID90872758 | URXP06     | PAH_I      | 15-16             | 1-Hydroxyphenanthrene      | 2433-56-9 | Urine | 150    | ng/L  | yes                    |
| DTXSID90872758 | URXP06     | PAH_D      | 05-06             | 1-Hydroxyphenanthrene      | 2433-56-9 | Urine | 150    | ng/L  | no                     |
| DTXSID90872758 | URXP06     | PHPYPA_B   | 01-02             | 1-Hydroxyphenanthrene      | 2433-56-9 | Urine | 150    | ng/L  | no                     |
| DTXSID90872758 | URXP06     | PAH_E      | 07-08             | 1-Hydroxyphenanthrene      | 2433-56-9 | Urine | 150    | ng/L  | no                     |
| DTXSID90872758 | URXP06     | PAH_H      | 13-14             | 1-Hydroxyphenanthrene      | 2433-56-9 | Urine | 150    | ng/L  | no                     |
| DTXSID8052722  | URXP07     | PAH_G      | 11-12             | 2-Hydroxyphenanthrene      | 605-55-0  | Urine | 150    | ng/L  | yes                    |
| DTXSID8052722  | URXP07     | L31PAH_C   | 03-04             | 2-Hydroxyphenanthrene      | 605-55-0  | Urine | 150    | ng/L  | no                     |
| DTXSID8052722  | URXP07     | PAH_E      | 07-08             | 2-Hydroxyphenanthrene      | 605-55-0  | Urine | 150    | ng/L  | no                     |
| DTXSID8052722  | URXP07     | PAH_F      | 09-10             | 2-Hydroxyphenanthrene      | 605-55-0  | Urine | 150    | ng/L  | no                     |
| DTXSID8052722  | URXP07     | PHPYPA_B   | 01-02             | 2-Hydroxyphenanthrene      | 605-55-0  | Urine | 150    | ng/L  | no                     |

| DTXSID          | NHANEScode | NHANESfile | recent_sa<br>mple | Name                        | CAS         | Media | MaxAge | units | Most_recent<br>_cohort |
|-----------------|------------|------------|-------------------|-----------------------------|-------------|-------|--------|-------|------------------------|
| DTXSID8052722   | URXP07     | PAH_D      | 05-06             | 2-Hydroxyphenanthrene       | 605-55-0    | Urine | 150    | ng/L  | no                     |
| DTXSID1038298   | URXP10     | PHPYPA_B   | 01-02             | 1-Hydroxypyrene             | 5315-79-7   | Urine | 150    | ng/L  | no                     |
| DTXSID1038298   | URXP10     | PAH_F      | 09-10             | 1-Hydroxypyrene             | 5315-79-7   | Urine | 150    | ng/L  | no                     |
| DTXSID1038298   | URXP10     | PAH_D      | 05-06             | 1-Hydroxypyrene             | 5315-79-7   | Urine | 150    | ng/L  | no                     |
| DTXSID1038298   | URXP10     | PAH_E      | 07-08             | 1-Hydroxypyrene             | 5315-79-7   | Urine | 150    | ng/L  | no                     |
| DTXSID1038298   | URXP10     | PAH_I      | 15-16             | 1-Hydroxypyrene             | 5315-79-7   | Urine | 150    | ng/L  | yes                    |
| DTXSID1038298   | URXP10     | PAH_G      | 11-12             | 1-Hydroxypyrene             | 5315-79-7   | Urine | 150    | ng/L  | no                     |
| DTXSID1038298   | URXP10     | L31PAH_C   | 03-04             | 1-Hydroxypyrene             | 5315-79-7   | Urine | 150    | ng/L  | no                     |
| DTXSID1038298   | URXP10     | PAH_H      | 13-14             | 1-Hydroxypyrene             | 5315-79-7   | Urine | 150    | ng/L  | no                     |
| DTXSID4052683   | URXP17     | L31PAH_C   | 03-04             | 9-Hydroxyfluorene           | 1689-64-1   | Urine | 150    | ng/L  | no                     |
| DTXSID4052683   | URXP17     | PAH_G      | 11-12             | 9-Hydroxyfluorene           | 1689-64-1   | Urine | 150    | ng/L  | yes                    |
| DTXSID4052683   | URXP17     | PAH_D      | 05-06             | 9-Hydroxyfluorene           | 1689-64-1   | Urine | 150    | ng/L  | no                     |
| DTXSID4052683   | URXP17     | PAH_E      | 07-08             | 9-Hydroxyfluorene           | 1689-64-1   | Urine | 150    | ng/L  | no                     |
| DTXSID4052683   | URXP17     | PAH_F      | 09-10             | 9-Hydroxyfluorene           | 1689-64-1   | Urine | 150    | ng/L  | no                     |
| DTXSID30227324  | URXP19     | PAH_G      | 11-12             | 4-Hydroxyphenanthrene       | 7651-86-7   | Urine | 150    | ng/L  | yes                    |
| DTXSID30227324  | URXP19     | L31PAH_C   | 03-04             | 4-Hydroxyphenanthrene       | 7651-86-7   | Urine | 150    | ng/L  | no                     |
| DTXSID30227324  | URXP19     | PAH_D      | 05-06             | 4-Hydroxyphenanthrene       | 7651-86-7   | Urine | 150    | ng/L  | no                     |
| DTXSID0021834   | URXP17     | LAB26PP    | 99-00             | Paranitrophenol             | 100-02-7    | Urine | 150    | ug/L  | no                     |
| DTXSID0021834   | URXP17     | I26PP_B    | 01-02             | Paranitrophenol             | 100-02-7    | Urine | 150    | ug/L  | no                     |
| DTXSID0021834   | URXP17     | UPHOPM_G   | 11-12             | Paranitrophenol             | 100-02-7    | Urine | 150    | ug/L  | no                     |
| DTXSID0021834   | URXP17     | UPHOPM_H   | 13-14             | Paranitrophenol             | 100-02-7    | Urine | 150    | ug/L  | yes                    |
| DTXSID0021834   | URXP17     | UPHOPM_E   | 07-08             | Paranitrophenol             | 100-02-7    | Urine | 150    | ug/L  | no                     |
| DTXSID0021834   | URXP17     | UPHOPM_F   | 09-10             | Paranitrophenol             | 100-02-7    | Urine | 150    | ug/L  | no                     |
| DTXSID7021106   | URXP17     | L26UPP_C   | 03-04             | Pentachlorophenol           | 87-86-5     | Urine | 150    | ug/L  | yes                    |
| DTXSID80209993  | URXP17     | UVOC_I     | 15-16             | Phenylglyoxylic Acid        | 611-73-4    | Urine | 150    | ng/mL | yes                    |
| DTXSID80209993  | URXP17     | UVOC_G     | 11-12             | Phenylglyoxylic Acid        | 611-73-4    | Urine | 150    | ng/mL | no                     |
| DTXSID80209993  | URXP17     | UVOC_H     | 13-14             | Phenylglyoxylic Acid        | 611-73-4    | Urine | 150    | ng/mL | no                     |
| DTXSID80209993  | URXP17     | SSUVOC_D   | 05-06             | Phenylglyoxylic Acid        | 611-73-4    | Urine | 150    | ng/mL | no                     |
| DTXSID3037628   | URXP17     | HCAA_H     | 13-14             | 2-Amino-1-methyl-6-phenyli  | 105650-23-5 | Urine | 150    | pg/mL | yes                    |
| DTXSID8032463   | URXP17     | UPP_D      | 05-06             | Primisulfuron-methyl        | 113036-87-6 | Urine | 150    | ug/L  | no                     |
| DTXSID8032463   | URXP17     | UPP_E      | 07-08             | Primisulfuron-methyl        | 113036-87-6 | Urine | 150    | ug/L  | yes                    |
| DTXSID8032463   | URXP17     | L26UPP_C   | 03-04             | Primisulfuron-methyl        | 113036-87-6 | Urine | 150    | ug/L  | no                     |
| DTXSID10905052  | URXP17     | UVOC_I     | 15-16             | S-Phenyl-N-acetylcysteine   | 4775-80-8   | Urine | 150    | ng/mL | yes                    |
| DTXSID10905052  | URXP17     | UVOC_G     | 11-12             | S-Phenyl-N-acetylcysteine   | 4775-80-8   | Urine | 150    | ng/mL | no                     |
| DTXSID10905052  | URXP17     | UVOC_H     | 13-14             | S-Phenyl-N-acetylcysteine   | 4775-80-8   | Urine | 150    | ng/mL | no                     |
| DTXSID10905052  | URXP17     | SSUVOC_D   | 05-06             | S-Phenyl-N-acetylcysteine   | 4775-80-8   | Urine | 150    | ng/mL | no                     |
| DTXSID601027639 | URXP17     | UVOC_H     | 13-14             | N-Acetyl-S-(3-hydroxypropyl | 33164-70-4  | Urine | 150    | ng/mL | no                     |
| DTXSID601027639 | URXP17     | UVOC_G     | 11-12             | N-Acetyl-S-(3-hydroxypropyl | 33164-70-4  | Urine | 150    | ng/mL | no                     |
| DTXSID601027639 | URXP17     | UVOC_I     | 15-16             | N-Acetyl-S-(3-hydroxypropyl | 33164-70-4  | Urine | 150    | ng/mL | yes                    |
| DTXSID601027639 | URXP17     | SSUVOC_D   | 05-06             | N-Acetyl-S-(3-hydroxypropyl | 33164-70-4  | Urine | 150    | ng/mL | no                     |
| DTXSID4022527   | URXP17     | EPH_D      | 05-06             | Propyl paraben              | 94-13-3     | Urine | 150    | ng/mL | no                     |
| DTXSID4022527   | URXP17     | EPH_G      | 11-12             | Propyl paraben              | 94-13-3     | Urine | 150    | ng/mL | no                     |
| DTXSID4022527   | URXP17     | EPHPP_H    | 13-14             | Propyl paraben              | 94-13-3     | Urine | 150    | ng/mL | no                     |
| DTXSID4022527   | URXP17     | EPHPP_I    | 15-16             | Propyl paraben              | 94-13-3     | Urine | 150    | ng/mL | yes                    |

| DTXSID         | NHANEScode | NHANESfile | recent_sa<br>mple | Name                           | CAS         | Media | MaxAge | units | Most_recent<br>_cohort |
|----------------|------------|------------|-------------------|--------------------------------|-------------|-------|--------|-------|------------------------|
| DTXSID4022527  | URXPPB     | EPH_F      | 09-10             | Propyl paraben                 | 94-13-3     | Urine | 150    | ng/mL | no                     |
| DTXSID4022527  | URXPPB     | EPH_E      | 07-08             | Propyl paraben                 | 94-13-3     | Urine | 150    | ng/mL | no                     |
| DTXSID1027502  | URXPPX     | L26UPP_C   | 03-04             | 2-isopropoxyphenol             | 4812-20-8   | Urine | 150    | ug/L  | yes                    |
| DTXSID1027502  | URXPPX     | I26PP_B    | 01-02             | 2-isopropoxyphenol             | 4812-20-8   | Urine | 150    | ug/L  | no                     |
| DTXSID1027502  | URXPPX     | LAB26PP    | 99-00             | 2-isopropoxyphenol             | 4812-20-8   | Urine | 150    | ug/L  | no                     |
| DTXSID9034868  | URXPRO     | UPP_D      | 05-06             | Prosulfuron                    | 94125-34-5  | Urine | 150    | ug/L  | no                     |
| DTXSID9034868  | URXPRO     | UPP_E      | 07-08             | Prosulfuron                    | 94125-34-5  | Urine | 150    | ug/L  | yes                    |
| DTXSID9034868  | URXPRO     | L26UPP_C   | 03-04             | Prosulfuron                    | 94125-34-5  | Urine | 150    | ug/L  | no                     |
| DTXSID3052694  | URXPTU     | L26UPP_C   | 03-04             | Propylene thiourea             | 2122-19-2   | Urine | 150    | ug/L  | no                     |
| DTXSID3052694  | URXPTU     | CARB_E     | 07-08             | Propylene thiourea             | 2122-19-2   | Urine | 150    | ug/L  | yes                    |
| DTXSID3052694  | URXPTU     | CARB_D     | 05-06             | Propylene thiourea             | 2122-19-2   | Urine | 150    | ug/L  | no                     |
| DTXSID1032642  | URXRIM     | UPP_E      | 07-08             | Rimsulfuron                    | 122931-48-0 | Urine | 150    | ug/L  | yes                    |
| DTXSID1032642  | URXRIM     | L26UPP_C   | 03-04             | Rimsulfuron                    | 122931-48-0 | Urine | 150    | ug/L  | no                     |
| DTXSID1032642  | URXRIM     | UPP_D      | 05-06             | Rimsulfuron                    | 122931-48-0 | Urine | 150    | ug/L  | no                     |
| DTXSID8047763  | URXSCN     | PERNT_I    | 15-16             | Thiocyanate                    | 302-04-5    | Urine | 150    | ng/mL | yes                    |
| DTXSID8047763  | URXSCN     | PERNT_F    | 09-10             | Thiocyanate                    | 302-04-5    | Urine | 150    | ng/mL | no                     |
| DTXSID8047763  | URXSCN     | PERNT_H    | 13-14             | Thiocyanate                    | 302-04-5    | Urine | 150    | ng/mL | no                     |
| DTXSID8047763  | URXSCN     | PERNT_G    | 11-12             | Thiocyanate                    | 302-04-5    | Urine | 150    | ng/mL | no                     |
| DTXSID5037494  | URXSISM    | UAM_E      | 07-08             | Desisopropyl atrazine merca    | 1007-28-9   | Urine | NA     | ug/L  | yes                    |
| DTXSID0034936  | URXSMM     | UPP_E      | 07-08             | Sulfometuron-methyl            | 74222-97-2  | Urine | 150    | ug/L  | yes                    |
| DTXSID0034936  | URXSMM     | L26UPP_C   | 03-04             | Sulfometuron-methyl            | 74222-97-2  | Urine | 150    | ug/L  | no                     |
| DTXSID0034936  | URXSMM     | UPP_D      | 05-06             | Sulfometuron-methyl            | 74222-97-2  | Urine | 150    | ug/L  | no                     |
| DTXSID4034940  | URXSSF     | UPP_E      | 07-08             | Sulfosulfuron                  | 141776-32-1 | Urine | 150    | ug/L  | yes                    |
| DTXSID4034940  | URXSSF     | UPP_D      | 05-06             | Sulfosulfuron                  | 141776-32-1 | Urine | 150    | ug/L  | no                     |
| DTXSID4034940  | URXSSF     | L26UPP_C   | 03-04             | Sulfosulfuron                  | 141776-32-1 | Urine | 150    | ug/L  | no                     |
| DTXSID9052717  | URXTCC     | UPHOPM_E   | 07-08             | trans-3-(2,2-dichlorovinyl)-2, | 55701-03-6  | Urine | 150    | ug/L  | no                     |
| DTXSID9052717  | URXTCC     | UPHOPM_H   | 13-14             | trans-3-(2,2-dichlorovinyl)-2, | 55701-03-6  | Urine | 150    | ug/L  | yes                    |
| DTXSID9052717  | URXTCC     | LAB26PP    | 99-00             | trans-3-(2,2-dichlorovinyl)-2, | 55701-03-6  | Urine | 150    | ug/L  | no                     |
| DTXSID9052717  | URXTCC     | I26PP_B    | 01-02             | trans-3-(2,2-dichlorovinyl)-2, | 55701-03-6  | Urine | 150    | ug/L  | no                     |
| DTXSID9052717  | URXTCC     | UPHOPM_F   | 09-10             | trans-3-(2,2-dichlorovinyl)-2, | 55701-03-6  | Urine | 150    | ug/L  | no                     |
| DTXSID9052717  | URXTCC     | UPHOPM_G   | 11-12             | trans-3-(2,2-dichlorovinyl)-2, | 55701-03-6  | Urine | 150    | ug/L  | no                     |
| DTXSID20149602 | URXTCV     | UVOC_G     | 11-12             | N-Acetyl-S-(trichlorovinyl)-L- | 111348-61-9 | Urine | 150    | ng/mL | no                     |
| DTXSID20149602 | URXTCV     | SSUVOC_D   | 05-06             | N-Acetyl-S-(trichlorovinyl)-L- | 111348-61-9 | Urine | 150    | ng/mL | no                     |
| DTXSID20149602 | URXTCV     | UVOC_H     | 13-14             | N-Acetyl-S-(trichlorovinyl)-L- | 111348-61-9 | Urine | 150    | ng/mL | no                     |
| DTXSID20149602 | URXTCV     | UVOC_I     | 15-16             | N-Acetyl-S-(trichlorovinyl)-L- | 111348-61-9 | Urine | 150    | ng/mL | yes                    |
| DTXSID1024124  | URXTHF     | UPP_E      | 07-08             | Thifensulfuron-methyl          | 79277-27-3  | Urine | 150    | ug/L  | yes                    |
| DTXSID1024124  | URXTHF     | UPP_D      | 05-06             | Thifensulfuron-methyl          | 79277-27-3  | Urine | 150    | ug/L  | no                     |
| DTXSID1024124  | URXTHF     | L26UPP_C   | 03-04             | Thifensulfuron-methyl          | 79277-27-3  | Urine | 150    | ug/L  | no                     |
| DTXSID4026214  | URXTLC     | EPHPP_I    | 15-16             | Triclocarban                   | 101-20-2    | Urine | 150    | ng/mL | yes                    |
| DTXSID4026214  | URXTLC     | EPHPP_H    | 13-14             | Triclocarban                   | 101-20-2    | Urine | 150    | ng/mL | no                     |
| DTXSID0024345  | URXTRA     | UPP_E      | 07-08             | Triasulfuron                   | 135100-29-7 | Urine | 150    | ug/L  | yes                    |
| DTXSID0024345  | URXTRA     | UPP_D      | 05-06             | Triasulfuron                   | 135100-29-7 | Urine | 150    | ug/L  | no                     |
| DTXSID0024345  | URXTRA     | L26UPP_C   | 03-04             | Triasulfuron                   | 135100-29-7 | Urine | 150    | ug/L  | no                     |
| DTXSID2032502  | URXTRN     | UPP_D      | 05-06             | Triflusaluron-methyl           | 135990-29-3 | Urine | 150    | ug/L  | no                     |

| DTXSID         | NHANEScode | NHANESfile | recent_sa<br>mple | Name                                      | CAS         | Media | MaxAge | units | Most_recent<br>_cohort |
|----------------|------------|------------|-------------------|-------------------------------------------|-------------|-------|--------|-------|------------------------|
| DTXSID2032502  | URXTRN     | UPP_E      | 07-08             | Triflurosulfuron-methyl                   | 135990-29-3 | Urine | 150    | ug/L  | yes                    |
| DTXSID2032502  | URXTRN     | L26UPP_C   | 03-04             | Triflurosulfuron-methyl                   | 135990-29-3 | Urine | 150    | ug/L  | no                     |
| DTXSID0043767  | URXTRP1    | HCAA_H     | 13-14             | 3-Amino-1,4-dimethyl-5H-pyridin-2(1H)-one | 62450-06-0  | Urine | NA     | pg/mL | yes                    |
| DTXSID5043768  | URXTRP2    | HCAA_H     | 13-14             | 1-Methyl-3-amino-5H-pyridin-2(1H)-one     | 62450-07-1  | Urine | NA     | pg/mL | yes                    |
| DTXSID5032498  | URXTRS     | EPH_F      | 09-10             | Triclosan                                 | 3380-34-5   | Urine | 150    | ng/mL | no                     |
| DTXSID5032498  | URXTRS     | EPH_E      | 07-08             | Triclosan                                 | 3380-34-5   | Urine | 150    | ng/mL | no                     |
| DTXSID5032498  | URXTRS     | EPHPP_H    | 13-14             | Triclosan                                 | 3380-34-5   | Urine | 150    | ng/mL | no                     |
| DTXSID5032498  | URXTRS     | EPH_D      | 05-06             | Triclosan                                 | 3380-34-5   | Urine | 150    | ng/mL | no                     |
| DTXSID5032498  | URXTRS     | EPH_G      | 11-12             | Triclosan                                 | 3380-34-5   | Urine | 150    | ng/mL | no                     |
| DTXSID5032498  | URXTRS     | EPHPP_I    | 15-16             | Triclosan                                 | 3380-34-5   | Urine | 150    | ng/mL | yes                    |
| DTXSID20943223 | URXTTC     | SSUVOC_D   | 05-06             | 2-Sulfanyl-4,5-dihydro-1,3-thiazole       | 20933-67-9  | Urine | 150    | ng/mL | no                     |
| DTXSID20943223 | URXTTC     | UVOC_G     | 11-12             | 2-Sulfanyl-4,5-dihydro-1,3-thiazole       | 20933-67-9  | Urine | 150    | ng/mL | no                     |
| DTXSID20943223 | URXTTC     | UVOC_H     | 13-14             | 2-Sulfanyl-4,5-dihydro-1,3-thiazole       | 20933-67-9  | Urine | 150    | ng/mL | yes                    |
| DTXSID0052833  | URXUAB     | UAS_E      | 07-08             | Arsenobetaine                             | 64436-13-1  | Urine | 150    | ug/L  | no                     |
| DTXSID0052833  | URXUAB     | UAS_H      | 13-14             | Arsenobetaine                             | 64436-13-1  | Urine | 150    | ug/L  | no                     |
| DTXSID0052833  | URXUAB     | UAS_I      | 15-16             | Arsenobetaine                             | 64436-13-1  | Urine | 150    | ug/L  | yes                    |
| DTXSID0052833  | URXUAB     | UAS_F      | 09-10             | Arsenobetaine                             | 64436-13-1  | Urine | 150    | ug/L  | no                     |
| DTXSID0052833  | URXUAB     | UAS_G      | 11-12             | Arsenobetaine                             | 64436-13-1  | Urine | 150    | ug/L  | no                     |
| DTXSID0052833  | URXUAB     | L06UAS_C   | 03-04             | Arsenobetaine                             | 64436-13-1  | Urine | 150    | ug/L  | no                     |
| DTXSID0052833  | URXUAB     | UAS_D      | 05-06             | Arsenobetaine                             | 64436-13-1  | Urine | 150    | ug/L  | no                     |
| DTXSID80873153 | URXUAC     | UAS_D      | 05-06             | Arsenocholine                             | 39895-81-3  | Urine | 150    | ug/L  | no                     |
| DTXSID80873153 | URXUAC     | UAS_G      | 11-12             | Arsenocholine                             | 39895-81-3  | Urine | 150    | ug/L  | no                     |
| DTXSID80873153 | URXUAC     | UAS_H      | 13-14             | Arsenocholine                             | 39895-81-3  | Urine | 150    | ug/L  | no                     |
| DTXSID80873153 | URXUAC     | UAS_I      | 15-16             | Arsenocholine                             | 39895-81-3  | Urine | 150    | ug/L  | yes                    |
| DTXSID80873153 | URXUAC     | UAS_F      | 09-10             | Arsenocholine                             | 39895-81-3  | Urine | 150    | ug/L  | no                     |
| DTXSID80873153 | URXUAC     | L06UAS_C   | 03-04             | Arsenocholine                             | 39895-81-3  | Urine | 150    | ug/L  | no                     |
| DTXSID80873153 | URXUAC     | UAS_E      | 07-08             | Arsenocholine                             | 39895-81-3  | Urine | 150    | ug/L  | no                     |
| DTXSID7074828  | URXUAS3    | UAS_G      | 11-12             | Arsenous acid                             | 13464-58-9  | Urine | 150    | ug/L  | no                     |
| DTXSID7074828  | URXUAS3    | UAS_H      | 13-14             | Arsenous acid                             | 13464-58-9  | Urine | 150    | ug/L  | no                     |
| DTXSID7074828  | URXUAS3    | UAS_I      | 15-16             | Arsenous acid                             | 13464-58-9  | Urine | 150    | ug/L  | yes                    |
| DTXSID7074828  | URXUAS3    | UAS_E      | 07-08             | Arsenous acid                             | 13464-58-9  | Urine | 150    | ug/L  | no                     |
| DTXSID7074828  | URXUAS3    | UAS_F      | 09-10             | Arsenous acid                             | 13464-58-9  | Urine | 150    | ug/L  | no                     |
| DTXSID7074828  | URXUAS3    | UAS_D      | 05-06             | Arsenous acid                             | 13464-58-9  | Urine | 150    | ug/L  | no                     |
| DTXSID7074828  | URXUAS3    | L06UAS_C   | 03-04             | Arsenous acid                             | 13464-58-9  | Urine | 150    | ug/L  | no                     |
| DTXSID1034341  | URXUAS5    | UAS_D      | 05-06             | Arsenic acid                              | 7778-39-4   | Urine | 150    | ug/L  | no                     |
| DTXSID1034341  | URXUAS5    | UAS_H      | 13-14             | Arsenic acid                              | 7778-39-4   | Urine | 150    | ug/L  | no                     |
| DTXSID1034341  | URXUAS5    | L06UAS_C   | 03-04             | Arsenic acid                              | 7778-39-4   | Urine | 150    | ug/L  | no                     |
| DTXSID1034341  | URXUAS5    | UAS_I      | 15-16             | Arsenic acid                              | 7778-39-4   | Urine | 150    | ug/L  | yes                    |
| DTXSID1034341  | URXUAS5    | UAS_F      | 09-10             | Arsenic acid                              | 7778-39-4   | Urine | 150    | ug/L  | no                     |
| DTXSID1034341  | URXUAS5    | UAS_G      | 11-12             | Arsenic acid                              | 7778-39-4   | Urine | 150    | ug/L  | no                     |
| DTXSID1034341  | URXUAS5    | UAS_E      | 07-08             | Arsenic acid                              | 7778-39-4   | Urine | 150    | ug/L  | no                     |
| DTXSID8023894  | URXUBA     | L06HM_B    | 01-02             | Barium                                    | 7440-39-3   | Urine | 150    | ng/mL | no                     |
| DTXSID8023894  | URXUBA     | UM_H       | 13-14             | Barium                                    | 7440-39-3   | Urine | 150    | ug/L  | no                     |
| DTXSID8023894  | URXUBA     | UHM_E      | 07-08             | Barium                                    | 7440-39-3   | Urine | 150    | ug/L  | no                     |



| DTXSID         | NHANEScode | NHANESfile | recent_sa<br>mple | Name                           | CAS        | Media | MaxAge | units | Most_recent<br>_cohort |
|----------------|------------|------------|-------------------|--------------------------------|------------|-------|--------|-------|------------------------|
| DTXSID8023894  | URXUBA     | UHM_F      | 09-10             | Barium                         | 7440-39-3  | Urine | 150    | ug/L  | no                     |
| DTXSID8023894  | URXUBA     | UHM_G      | 11-12             | Barium                         | 7440-39-3  | Urine | 150    | ug/L  | no                     |
| DTXSID8023894  | URXUBA     | UM_I       | 15-16             | Barium                         | 7440-39-3  | Urine | 150    | ug/L  | yes                    |
| DTXSID8023894  | URXUBA     | UHM_D      | 05-06             | Barium                         | 7440-39-3  | Urine | 150    | ug/L  | no                     |
| DTXSID8023894  | URXUBA     | LAB06HM    | 99-00             | Barium                         | 7440-39-3  | Urine | 150    | ng/mL | no                     |
| DTXSID8023894  | URXUBA     | L06HM_C    | 03-04             | Barium                         | 7440-39-3  | Urine | 150    | ng/mL | no                     |
| DTXSID4023913  | URXUBE     | UHM_E      | 07-08             | Beryllium                      | 7440-41-7  | Urine | 150    | ug/L  | no                     |
| DTXSID4023913  | URXUBE     | UHM_D      | 05-06             | Beryllium                      | 7440-41-7  | Urine | 150    | ug/L  | no                     |
| DTXSID4023913  | URXUBE     | L06HM_B    | 01-02             | Beryllium                      | 7440-41-7  | Urine | 150    | ng/mL | no                     |
| DTXSID4023913  | URXUBE     | UHM_F      | 09-10             | Beryllium                      | 7440-41-7  | Urine | 150    | ug/L  | yes                    |
| DTXSID4023913  | URXUBE     | L06HM_C    | 03-04             | Beryllium                      | 7440-41-7  | Urine | 150    | ng/mL | no                     |
| DTXSID4023913  | URXUBE     | LAB06HM    | 99-00             | Beryllium                      | 7440-41-7  | Urine | 150    | ng/mL | no                     |
| DTXSID1023940  | URXUCD     | UHM_F      | 09-10             | Cadmium                        | 7440-43-9  | Urine | 150    | ug/L  | no                     |
| DTXSID1023940  | URXUCD     | UHM_G      | 11-12             | Cadmium                        | 7440-43-9  | Urine | 150    | ug/L  | no                     |
| DTXSID1023940  | URXUCD     | UHM_E      | 07-08             | Cadmium                        | 7440-43-9  | Urine | 150    | ug/L  | no                     |
| DTXSID1023940  | URXUCD     | UM_I       | 15-16             | Cadmium                        | 7440-43-9  | Urine | 150    | ug/L  | yes                    |
| DTXSID1023940  | URXUCD     | UHM_D      | 05-06             | Cadmium                        | 7440-43-9  | Urine | 150    | ug/L  | no                     |
| DTXSID1023940  | URXUCD     | UM_H       | 13-14             | Cadmium                        | 7440-43-9  | Urine | 150    | ug/L  | no                     |
| DTXSID1023940  | URXUCD     | L06HM_C    | 03-04             | Cadmium                        | 7440-43-9  | Urine | 150    | ng/mL | no                     |
| DTXSID5036767  | URXUCS     | UM_H       | 13-14             | Cesium                         | 7440-46-2  | Urine | 150    | ug/L  | no                     |
| DTXSID5036767  | URXUCS     | LAB06HM    | 99-00             | Cesium                         | 7440-46-2  | Urine | 150    | ng/mL | no                     |
| DTXSID5036767  | URXUCS     | L06HM_B    | 01-02             | Cesium                         | 7440-46-2  | Urine | 150    | ng/mL | no                     |
| DTXSID5036767  | URXUCS     | UM_I       | 15-16             | Cesium                         | 7440-46-2  | Urine | 150    | ug/L  | yes                    |
| DTXSID5036767  | URXUCS     | UHM_G      | 11-12             | Cesium                         | 7440-46-2  | Urine | 150    | ug/L  | no                     |
| DTXSID5036767  | URXUCS     | UHM_E      | 07-08             | Cesium                         | 7440-46-2  | Urine | 150    | ug/L  | no                     |
| DTXSID5036767  | URXUCS     | L06HM_C    | 03-04             | Cesium                         | 7440-46-2  | Urine | 150    | ng/mL | no                     |
| DTXSID5036767  | URXUCS     | UHM_F      | 09-10             | Cesium                         | 7440-46-2  | Urine | 150    | ug/L  | no                     |
| DTXSID5036767  | URXUCS     | UHM_D      | 05-06             | Cesium                         | 7440-46-2  | Urine | 150    | ug/L  | no                     |
| DTXSID7020508  | URXUDMA    | UAS_E      | 07-08             | Dimethylarsinic acid           | 75-60-5    | Urine | 150    | ug/L  | no                     |
| DTXSID7020508  | URXUDMA    | L06UAS_C   | 03-04             | Dimethylarsinic acid           | 75-60-5    | Urine | 150    | ug/L  | no                     |
| DTXSID7020508  | URXUDMA    | UAS_H      | 13-14             | Dimethylarsinic acid           | 75-60-5    | Urine | 150    | ug/L  | no                     |
| DTXSID7020508  | URXUDMA    | UAS_D      | 05-06             | Dimethylarsinic acid           | 75-60-5    | Urine | 150    | ug/L  | no                     |
| DTXSID7020508  | URXUDMA    | UAS_F      | 09-10             | Dimethylarsinic acid           | 75-60-5    | Urine | 150    | ug/L  | no                     |
| DTXSID7020508  | URXUDMA    | UAS_I      | 15-16             | Dimethylarsinic acid           | 75-60-5    | Urine | 150    | ug/L  | yes                    |
| DTXSID7020508  | URXUDMA    | UAS_G      | 11-12             | Dimethylarsinic acid           | 75-60-5    | Urine | 150    | ug/L  | no                     |
| DTXSID1024172  | URXUHG     | UHG_H      | 13-14             | Mercury                        | 7439-97-6  | Urine | 150    | ug/L  | no                     |
| DTXSID1024172  | URXUHG     | UHG_I      | 15-16             | Mercury                        | 7439-97-6  | Urine | 150    | ng/mL | yes                    |
| DTXSID1024172  | URXUHG     | UHG_G      | 11-12             | Mercury                        | 7439-97-6  | Urine | 150    | ug/L  | no                     |
| DTXSID1024172  | URXUHG     | L06UHG_C   | 03-04             | Mercury                        | 7439-97-6  | Urine | 150    | ng/mL | no                     |
| DTXSID1024172  | URXUHG     | UHG_F      | 09-10             | Mercury                        | 7439-97-6  | Urine | 150    | ug/L  | no                     |
| DTXSID1024172  | URXUHG     | UHG_D      | 05-06             | Mercury                        | 7439-97-6  | Urine | 150    | ng/mL | no                     |
| DTXSID1024172  | URXUHG     | UHG_E      | 07-08             | Mercury                        | 7439-97-6  | Urine | 150    | ug/L  | no                     |
| DTXSID80215817 | URXUMMA    | L06UAS_C   | 03-04             | Arsonic acid, methyl-, iron(2- | 65513-69-1 | Urine | 150    | ug/L  | no                     |
| DTXSID80215817 | URXUMMA    | UAS_H      | 13-14             | Arsonic acid, methyl-, iron(2- | 65513-69-1 | Urine | 150    | ug/L  | no                     |

| DTXSID         | NHANEScode | NHANESfile | recent_sa<br>mple | Name                           | CAS        | Media | MaxAge | units | Most_recent<br>_cohort |
|----------------|------------|------------|-------------------|--------------------------------|------------|-------|--------|-------|------------------------|
| DTXSID80215817 | URXUMMA    | UAS_I      | 15-16             | Arsonic acid, methyl-, iron(2- | 65513-69-1 | Urine | 150    | ug/L  | yes                    |
| DTXSID80215817 | URXUMMA    | UAS_G      | 11-12             | Arsonic acid, methyl-, iron(2- | 65513-69-1 | Urine | 150    | ug/L  | no                     |
| DTXSID80215817 | URXUMMA    | UAS_F      | 09-10             | Arsonic acid, methyl-, iron(2- | 65513-69-1 | Urine | 150    | ug/L  | no                     |
| DTXSID80215817 | URXUMMA    | UAS_E      | 07-08             | Arsonic acid, methyl-, iron(2- | 65513-69-1 | Urine | 150    | ug/L  | no                     |
| DTXSID80215817 | URXUMMA    | UAS_D      | 05-06             | Arsonic acid, methyl-, iron(2- | 65513-69-1 | Urine | 150    | ug/L  | no                     |
| DTXSID2024169  | URXUMN     | UM_H       | 13-14             | Manganese                      | 7439-96-5  | Urine | 150    | ug/L  | no                     |
| DTXSID2024169  | URXUMN     | UM_I       | 15-16             | Manganese                      | 7439-96-5  | Urine | 150    | ug/L  | yes                    |
| DTXSID2024169  | URXUMN     | UHM_G      | 11-12             | Manganese                      | 7439-96-5  | Urine | 150    | ug/L  | no                     |
| DTXSID1024207  | URXUMO     | UHM_D      | 05-06             | Molybdenum                     | 7439-98-7  | Urine | 150    | ug/L  | no                     |
| DTXSID1024207  | URXUMO     | UHM_E      | 07-08             | Molybdenum                     | 7439-98-7  | Urine | 150    | ug/L  | no                     |
| DTXSID1024207  | URXUMO     | LAB06HM    | 99-00             | Molybdenum                     | 7439-98-7  | Urine | 150    | ng/mL | no                     |
| DTXSID1024207  | URXUMO     | UM_H       | 13-14             | Molybdenum                     | 7439-98-7  | Urine | 150    | ug/L  | no                     |
| DTXSID1024207  | URXUMO     | UM_I       | 15-16             | Molybdenum                     | 7439-98-7  | Urine | 150    | ug/L  | yes                    |
| DTXSID1024207  | URXUMO     | UHM_F      | 09-10             | Molybdenum                     | 7439-98-7  | Urine | 150    | ug/L  | no                     |
| DTXSID1024207  | URXUMO     | UHM_G      | 11-12             | Molybdenum                     | 7439-98-7  | Urine | 150    | ug/L  | no                     |
| DTXSID1024207  | URXUMO     | L06HM_B    | 01-02             | Molybdenum                     | 7439-98-7  | Urine | 150    | ng/mL | no                     |
| DTXSID1024207  | URXUMO     | L06HM_C    | 03-04             | Molybdenum                     | 7439-98-7  | Urine | 150    | ng/mL | no                     |
| DTXSID6024252  | URXUP8     | PERNT_I    | 15-16             | Perchlorate                    | 14797-73-0 | Urine | 150    | ng/mL | yes                    |
| DTXSID6024252  | URXUP8     | PERNT_F    | 09-10             | Perchlorate                    | 14797-73-0 | Urine | 150    | ng/mL | no                     |
| DTXSID6024252  | URXUP8     | L04PER_C   | 03-04             | Perchlorate                    | 14797-73-0 | Urine | 150    | ng/mL | no                     |
| DTXSID6024252  | URXUP8     | PERNT_H    | 13-14             | Perchlorate                    | 14797-73-0 | Urine | 150    | ng/mL | no                     |
| DTXSID6024252  | URXUP8     | PERNT_G    | 11-12             | Perchlorate                    | 14797-73-0 | Urine | 150    | ng/mL | no                     |
| DTXSID2024161  | URXUPB     | UHM_E      | 07-08             | Lead                           | 7439-92-1  | Urine | 150    | ug/L  | no                     |
| DTXSID2024161  | URXUPB     | UHM_F      | 09-10             | Lead                           | 7439-92-1  | Urine | 150    | ug/L  | no                     |
| DTXSID2024161  | URXUPB     | UM_H       | 13-14             | Lead                           | 7439-92-1  | Urine | 150    | ug/L  | no                     |
| DTXSID2024161  | URXUPB     | UHM_G      | 11-12             | Lead                           | 7439-92-1  | Urine | 150    | ug/L  | no                     |
| DTXSID2024161  | URXUPB     | UHM_D      | 05-06             | Lead                           | 7439-92-1  | Urine | 150    | ug/L  | no                     |
| DTXSID2024161  | URXUPB     | LAB06HM    | 99-00             | Lead                           | 7439-92-1  | Urine | 150    | ng/mL | no                     |
| DTXSID2024161  | URXUPB     | UM_I       | 15-16             | Lead                           | 7439-92-1  | Urine | 150    | ug/L  | yes                    |
| DTXSID2024161  | URXUPB     | L06HM_C    | 03-04             | Lead                           | 7439-92-1  | Urine | 150    | ng/mL | no                     |
| DTXSID2024161  | URXUPB     | L06HM_B    | 01-02             | Lead                           | 7439-92-1  | Urine | 150    | ng/mL | no                     |
| DTXSID5023879  | URXUSB     | UHM_G      | 11-12             | Antimony                       | 7440-36-0  | Urine | 150    | ug/L  | no                     |
| DTXSID5023879  | URXUSB     | LAB06HM    | 99-00             | Antimony                       | 7440-36-0  | Urine | 150    | ng/mL | no                     |
| DTXSID5023879  | URXUSB     | UM_I       | 15-16             | Antimony                       | 7440-36-0  | Urine | 150    | ug/L  | yes                    |
| DTXSID5023879  | URXUSB     | L06HM_C    | 03-04             | Antimony                       | 7440-36-0  | Urine | 150    | ng/mL | no                     |
| DTXSID5023879  | URXUSB     | UHM_F      | 09-10             | Antimony                       | 7440-36-0  | Urine | 150    | ug/L  | no                     |
| DTXSID5023879  | URXUSB     | UHM_D      | 05-06             | Antimony                       | 7440-36-0  | Urine | 150    | ug/L  | no                     |
| DTXSID5023879  | URXUSB     | UM_H       | 13-14             | Antimony                       | 7440-36-0  | Urine | 150    | ug/L  | no                     |
| DTXSID5023879  | URXUSB     | L06HM_B    | 01-02             | Antimony                       | 7440-36-0  | Urine | 150    | ng/mL | no                     |
| DTXSID5023879  | URXUSB     | UHM_E      | 07-08             | Antimony                       | 7440-36-0  | Urine | 150    | ug/L  | no                     |
| DTXSID1049801  | URXUSN     | UM_I       | 15-16             | Tin                            | 7440-31-5  | Urine | 150    | ug/L  | yes                    |
| DTXSID1049801  | URXUSN     | UHM_G      | 11-12             | Tin                            | 7440-31-5  | Urine | 150    | ug/L  | no                     |
| DTXSID1049801  | URXUSN     | UM_H       | 13-14             | Tin                            | 7440-31-5  | Urine | 150    | ug/L  | no                     |
| DTXSID3024312  | URXUSR     | UHM_G      | 11-12             | Strontium                      | 7440-24-6  | Urine | 150    | ug/L  | no                     |

| DTXSID        | NHANEScode | NHANESfile | recent_sa<br>mple | Name                  | CAS       | Media | MaxAge | units | Most_recent<br>_cohort |
|---------------|------------|------------|-------------------|-----------------------|-----------|-------|--------|-------|------------------------|
| DTXSID3024312 | URXUSR     | UM_I       | 15-16             | Strontium             | 7440-24-6 | Urine | 150    | ug/L  | yes                    |
| DTXSID3024312 | URXUSR     | UM_H       | 13-14             | Strontium             | 7440-24-6 | Urine | 150    | ug/L  | no                     |
| DTXSID2036035 | URXUTL     | LAB06HM    | 99-00             | Thallium              | 7440-28-0 | Urine | 150    | ng/mL | no                     |
| DTXSID2036035 | URXUTL     | L06HM_B    | 01-02             | Thallium              | 7440-28-0 | Urine | 150    | ng/mL | no                     |
| DTXSID2036035 | URXUTL     | L06HM_C    | 03-04             | Thallium              | 7440-28-0 | Urine | 150    | ng/mL | no                     |
| DTXSID2036035 | URXUTL     | UHM_D      | 05-06             | Thallium              | 7440-28-0 | Urine | 150    | ug/L  | no                     |
| DTXSID2036035 | URXUTL     | UHM_G      | 11-12             | Thallium              | 7440-28-0 | Urine | 150    | ug/L  | no                     |
| DTXSID2036035 | URXUTL     | UM_H       | 13-14             | Thallium              | 7440-28-0 | Urine | 150    | ug/L  | no                     |
| DTXSID2036035 | URXUTL     | UHM_F      | 09-10             | Thallium              | 7440-28-0 | Urine | 150    | ug/L  | no                     |
| DTXSID2036035 | URXUTL     | UM_I       | 15-16             | Thallium              | 7440-28-0 | Urine | 150    | ug/L  | yes                    |
| DTXSID2036035 | URXUTL     | UHM_E      | 07-08             | Thallium              | 7440-28-0 | Urine | 150    | ug/L  | no                     |
| DTXSID1021401 | URXUTM     | UAS_G      | 11-12             | Trimethylarsine oxide | 4964-14-1 | Urine | 150    | ug/L  | yes                    |
| DTXSID1021401 | URXUTM     | UAS_E      | 07-08             | Trimethylarsine oxide | 4964-14-1 | Urine | 150    | ug/L  | no                     |
| DTXSID1021401 | URXUTM     | UAS_F      | 09-10             | Trimethylarsine oxide | 4964-14-1 | Urine | 150    | ug/L  | no                     |
| DTXSID1021401 | URXUTM     | UAS_D      | 05-06             | Trimethylarsine oxide | 4964-14-1 | Urine | 150    | ug/L  | no                     |
| DTXSID1021401 | URXUTM     | L06UAS_C   | 03-04             | Trimethylarsine oxide | 4964-14-1 | Urine | 150    | ug/L  | no                     |
| DTXSID8052481 | URXUTU     | UM_I       | 15-16             | Tungsten              | 7440-33-7 | Urine | 150    | ug/L  | yes                    |
| DTXSID8052481 | URXUTU     | LAB06HM    | 99-00             | Tungsten              | 7440-33-7 | Urine | 150    | ng/mL | no                     |
| DTXSID8052481 | URXUTU     | L06HM_B    | 01-02             | Tungsten              | 7440-33-7 | Urine | 150    | ng/mL | no                     |
| DTXSID8052481 | URXUTU     | UM_H       | 13-14             | Tungsten              | 7440-33-7 | Urine | 150    | ug/L  | no                     |
| DTXSID8052481 | URXUTU     | UHM_F      | 09-10             | Tungsten              | 7440-33-7 | Urine | 150    | ug/L  | no                     |
| DTXSID8052481 | URXUTU     | UHM_E      | 07-08             | Tungsten              | 7440-33-7 | Urine | 150    | ug/L  | no                     |
| DTXSID8052481 | URXUTU     | L06HM_C    | 03-04             | Tungsten              | 7440-33-7 | Urine | 150    | ng/mL | no                     |
| DTXSID8052481 | URXUTU     | UHM_D      | 05-06             | Tungsten              | 7440-33-7 | Urine | 150    | ug/L  | no                     |
| DTXSID8052481 | URXUTU     | UHM_G      | 11-12             | Tungsten              | 7440-33-7 | Urine | 150    | ug/L  | no                     |
| DTXSID1042522 | URXUUR     | UM_I       | 15-16             | Uranium               | 7440-61-1 | Urine | 150    | ug/L  | no                     |
| DTXSID1042522 | URXUUR     | UHM_E      | 07-08             | Uranium               | 7440-61-1 | Urine | 150    | ug/L  | no                     |
| DTXSID1042522 | URXUUR     | UM_H       | 13-14             | Uranium               | 7440-61-1 | Urine | 150    | ug/L  | yes                    |
| DTXSID1042522 | URXUUR     | L06HM_C    | 03-04             | Uranium               | 7440-61-1 | Urine | 150    | ng/mL | no                     |
| DTXSID1042522 | URXUUR     | UHM_G      | 11-12             | Uranium               | 7440-61-1 | Urine | 150    | ug/L  | no                     |
| DTXSID1042522 | URXUUR     | UHM_D      | 05-06             | Uranium               | 7440-61-1 | Urine | 150    | ug/L  | no                     |
| DTXSID1042522 | URXUUR     | L06HM_B    | 01-02             | Uranium               | 7440-61-1 | Urine | 150    | ng/mL | no                     |
| DTXSID1042522 | URXUUR     | UHM_F      | 09-10             | Uranium               | 7440-61-1 | Urine | 150    | ug/L  | no                     |

Table S2. Table 2 of the bayesmarker input file, the weights table. Lists other NHANES files and needed columns to perform scaling and other transformations of the concentration data.

Abbreviations: wtvariable (variable code for survey weights), BWfile (file name for bodyweight measurements), BWvariable (columnname in bodyweight file containing the bodyweight measurement), Bwcomment (accompanying column for additional bodyweight data), Examwts (2 year mobile exam unit weights), demofile (name of demographic file), creatfile (name of creatinine file), urineflow (name of urine flow file)

| sample | file         | wtvariable | BWfile    | BWvariable | Bwcomment | Examwts  | demofile   | creatfile    | urineflow    |
|--------|--------------|------------|-----------|------------|-----------|----------|------------|--------------|--------------|
| 01-02  | I26PP_B.XPT  | WTSP2YR    | BMX_B.XPT | BMXWT      | BMIWT     | WTMEC2YR | demo_b.xpt | l16_b.xpt    |              |
| 03-04  | L26UPP_C.XPT | WTSC2YR    | BMX_C.XPT | BMXWT      | BMIWT     | WTMEC2YR | demo_c.xpt | l16_c.xpt    |              |
| 07-08  | CARB_E.XPT   | WTSC2YR    | BMX_E.XPT | BMXWT      | BMIWT     | WTMEC2YR | demo_e.xpt | alb_cr_e.xpt |              |
| 07-08  | UAM_E.XPT    | WTSC2YR    | BMX_E.XPT | BMXWT      | BMIWT     | WTMEC2YR | demo_e.xpt | alb_cr_e.xpt |              |
| 07-08  | UPP_E.XPT    | WTSC2YR    | BMX_E.XPT | BMXWT      | BMIWT     | WTMEC2YR | demo_e.xpt | alb_cr_e.xpt |              |
| 09-10  | EPH_F.XPT    | WTSC2YR    | BMX_F.XPT | BMXWT      | BMIWT     | WTMEC2YR | demo_f.xpt | alb_cr_f.xpt | ucflow_f.xpt |
| 09-10  | PHTHTE_F.XPT | WTSC2YR    | BMX_F.XPT | BMXWT      | BMIWT     | WTMEC2YR | demo_f.xpt | alb_cr_f.xpt | ucflow_f.xpt |
| 09-10  | PHYTO_F.XPT  | WTSC2YR    | BMX_F.XPT | BMXWT      | BMIWT     | WTMEC2YR | demo_f.xpt | alb_cr_f.xpt | ucflow_f.xpt |
| 09-10  | PP_F.XPT     | WTSC2YR    | BMX_F.XPT | BMXWT      | BMIWT     | WTMEC2YR | demo_f.xpt | alb_cr_f.xpt | ucflow_f.xpt |
| 09-10  | UHM_F.XPT    | WTSC2YR    | BMX_F.XPT | BMXWT      | BMIWT     | WTMEC2YR | demo_f.xpt | alb_cr_f.xpt | ucflow_f.xpt |
| 09-10  | UPHOPM_F.XPT | WTSC2YR    | BMX_F.XPT | BMXWT      | BMIWT     | WTMEC2YR | demo_f.xpt | alb_cr_f.xpt | ucflow_f.xpt |
| 11-12  | OPD_G.XPT    | WTSC2YR    | BMX_G.XPT | BMXWT      | BMIWT     | WTMEC2YR | demo_g.xpt | alb_cr_g.xpt | ucflow_g.xpt |
| 11-12  | PAH_G.XPT    | WTSC2YR    | BMX_G.XPT | BMXWT      | BMIWT     | WTMEC2YR | demo_g.xpt | alb_cr_g.xpt | ucflow_g.xpt |
| 11-12  | PHTHTE_G.XPT | WTSC2YR    | BMX_G.XPT | BMXWT      | BMIWT     | WTMEC2YR | demo_g.xpt | alb_cr_g.xpt | ucflow_g.xpt |
| 11-12  | UAS_G.XPT    | WTSC2YR    | BMX_G.XPT | BMXWT      | BMIWT     | WTMEC2YR | demo_g.xpt | alb_cr_g.xpt | ucflow_g.xpt |
| 13-14  | DEET_H.XPT   | WTSC2YR    | BMX_H.XPT | BMXWT      | BMIWT     | WTMEC2YR | demo_h.xpt | alb_cr_h.xpt | ucflow_h.xpt |
| 13-14  | HCAA_H.XPT   | WTSC2YR    | BMX_H.XPT | BMXWT      | BMIWT     | WTMEC2YR | demo_h.xpt | alb_cr_h.xpt | ucflow_h.xpt |
| 13-14  | SSFLRT_H.XPT | WTSC2YR    | BMX_H.XPT | BMXWT      | BMIWT     | WTMEC2YR | demo_h.xpt | alb_cr_h.xpt | ucflow_h.xpt |
| 13-14  | TSNA_H.XPT   | WTSC2YR    | BMX_H.XPT | BMXWT      | BMIWT     | WTMEC2YR | demo_h.xpt | alb_cr_h.xpt | ucflow_h.xpt |
| 13-14  | UPHOPM_H.XPT | WTSC2YR    | BMX_H.XPT | BMXWT      | BMIWT     | WTMEC2YR | demo_h.xpt | alb_cr_h.xpt | ucflow_h.xpt |
| 13-14  | UVOC_H.XPT   | WTSC2YR    | BMX_H.XPT | BMXWT      | BMIWT     | WTMEC2YR | demo_h.xpt | alb_cr_h.xpt | ucflow_h.xpt |
| 15-16  | DEET_I.XPT   | WTSC2YR    | BMX_I.XPT | BMXWT      | BMIWT     | WTMEC2YR | demo_i.xpt | alb_cr_i.xpt | ucflow_i.xpt |
| 15-16  | EPHPP_I.XPT  | WTSC2YR    | BMX_I.XPT | BMXWT      | BMIWT     | WTMEC2YR | demo_i.xpt | alb_cr_i.xpt | ucflow_i.xpt |
| 15-16  | PAH_I.XPT    | WTSC2YR    | BMX_I.XPT | BMXWT      | BMIWT     | WTMEC2YR | demo_i.xpt | alb_cr_i.xpt | ucflow_i.xpt |
| 15-16  | PERNT_I.XPT  | WTSC2YR    | BMX_I.XPT | BMXWT      | BMIWT     | WTMEC2YR | demo_i.xpt | alb_cr_i.xpt | ucflow_i.xpt |
| 15-16  | PHTHTE_I.XPT | WTSC2YR    | BMX_I.XPT | BMXWT      | BMIWT     | WTMEC2YR | demo_i.xpt | alb_cr_i.xpt | ucflow_i.xpt |
| 15-16  | SSMHHT_I.XPT | WTSC2YR    | BMX_I.XPT | BMXWT      | BMIWT     | WTMEC2YR | demo_i.xpt | alb_cr_i.xpt | ucflow_i.xpt |
| 15-16  | UAS_I.XPT    | WTSC2YR    | BMX_I.XPT | BMXWT      | BMIWT     | WTMEC2YR | demo_i.xpt | alb_cr_i.xpt | ucflow_i.xpt |
| 15-16  | UHG_I.XPT    | WTSC2YR    | BMX_I.XPT | BMXWT      | BMIWT     | WTMEC2YR | demo_i.xpt | alb_cr_i.xpt | ucflow_i.xpt |
| 15-16  | UM_I.XPT     | WTSC2YR    | BMX_I.XPT | BMXWT      | BMIWT     | WTMEC2YR | demo_i.xpt | alb_cr_i.xpt | ucflow_i.xpt |
| 15-16  | UVOC_I.XPT   | WTSC2YR    | BMX_I.XPT | BMXWT      | BMIWT     | WTMEC2YR | demo_i.xpt | alb_cr_i.xpt | ucflow_i.xpt |
| 99-00  | LAB26PP.XPT  | WTSP2YR    | BMX.XPT   | BMXWT      | BMIWT     | WTMEC2YR | demo.xpt   | lab16.xpt    |              |
| 05-06  | CARB_D.XPT   | WTSC2YR    | BMX_D.XPT | BMXWT      | BMIWT     | WTMEC2YR | demo_d.xpt | alb_cr_d.xpt |              |
| 01-02  | PHPYPA_B.XPT | WTSPH2YR   | BMX_B.XPT | BMXWT      | BMIWT     | WTMEC2YR | demo_b.xpt | l16_b.xpt    |              |
| 01-02  | L06HM_B.XPT  | WTSHM2YR   | BMX_B.XPT | BMXWT      | BMIWT     | WTMEC2YR | demo_b.xpt | l16_b.xpt    |              |
| 03-04  | L24PP_C.XPT  | WTSC2YR    | BMX_C.XPT | BMXWT      | BMIWT     | WTMEC2YR | demo_c.xpt | l16_c.xpt    |              |
| 03-04  | L24EPH_C.XPT | WTSC2YR    | BMX_C.XPT | BMXWT      | BMIWT     | WTMEC2YR | demo_c.xpt | l16_c.xpt    |              |
| 03-04  | L06PHY_C.XPT | WTSC2YR    | BMX_C.XPT | BMXWT      | BMIWT     | WTMEC2YR | demo_c.xpt | l16_c.xpt    |              |
| 03-04  | L24PH_C.XPT  | WTSC2YR    | BMX_C.XPT | BMXWT      | BMIWT     | WTMEC2YR | demo_c.xpt | l16_c.xpt    |              |

| sample | file         | wtvariable | BWfile    | BWvariable | Bwcomment | Examwts  | demofile   | creatfile    | urineflow    |
|--------|--------------|------------|-----------|------------|-----------|----------|------------|--------------|--------------|
| 03-04  | L26OPD_C.XPT | WTSC2YR    | BMX_C.XPT | BMXWT      | BMIWT     | WTMEC2YR | demo_c.xpt | l16_c.xpt    |              |
| 03-04  | L31PAH_C.XPT | WTSB2YR    | BMX_C.XPT | BMXWT      | BMIWT     | WTMEC2YR | demo_c.xpt | l16_c.xpt    |              |
| 03-04  | L06UAS_C.XPT | WTSA2YR    | BMX_C.XPT | BMXWT      | BMIWT     | WTMEC2YR | demo_c.xpt | l16_c.xpt    |              |
| 03-04  | L06HM_C.XPT  | WTSA2YR    | BMX_C.XPT | BMXWT      | BMIWT     | WTMEC2YR | demo_c.xpt | l16_c.xpt    |              |
| 03-04  | L06UHG_C.XPT | WTSA2YR    | BMX_C.XPT | BMXWT      | BMIWT     | WTMEC2YR | demo_c.xpt | l16_c.xpt    |              |
| 03-04  | L04PER_C.XPT | WTSC2YR    | BMX_C.XPT | BMXWT      | BMIWT     | WTMEC2YR | demo_c.xpt | l16_c.xpt    |              |
| 05-06  | PP_D.XPT     | WTSB2YR    | BMX_D.XPT | BMXWT      | BMIWT     | WTMEC2YR | demo_d.xpt | alb_cr_d.xpt |              |
| 05-06  | SSUVOC_D.XPT | WTSVOC2Y   | BMX_D.XPT | BMXWT      | BMIWT     | WTMEC2YR | demo_d.xpt | alb_cr_d.xpt |              |
| 05-06  | EPH_D.XPT    | WTSB2YR    | BMX_D.XPT | BMXWT      | BMIWT     | WTMEC2YR | demo_d.xpt | alb_cr_d.xpt |              |
| 05-06  | UPP_D.XPT    | WTSC2YR    | BMX_D.XPT | BMXWT      | BMIWT     | WTMEC2YR | demo_d.xpt | alb_cr_d.xpt |              |
| 05-06  | PHTHTE_D.XPT | WTSB2YR    | BMX_D.XPT | BMXWT      | BMIWT     | WTMEC2YR | demo_d.xpt | alb_cr_d.xpt |              |
| 05-06  | PHYTO_D.XPT  | WTSB2YR    | BMX_D.XPT | BMXWT      | BMIWT     | WTMEC2YR | demo_d.xpt | alb_cr_d.xpt |              |
| 05-06  | OPD_D.XPT    | WTSC2YR    | BMX_D.XPT | BMXWT      | BMIWT     | WTMEC2YR | demo_d.xpt | alb_cr_d.xpt |              |
| 05-06  | PAH_D.XPT    | WTSB2YR    | BMX_D.XPT | BMXWT      | BMIWT     | WTMEC2YR | demo_d.xpt | alb_cr_d.xpt |              |
| 05-06  | UAS_D.XPT    | WTSA2YR    | BMX_D.XPT | BMXWT      | BMIWT     | WTMEC2YR | demo_d.xpt | alb_cr_d.xpt |              |
| 05-06  | UHM_D.XPT    | WTSA2YR    | BMX_D.XPT | BMXWT      | BMIWT     | WTMEC2YR | demo_d.xpt | alb_cr_d.xpt |              |
| 05-06  | UHG_D.XPT    | WTSA2YR    | BMX_D.XPT | BMXWT      | BMIWT     | WTMEC2YR | demo_d.xpt | alb_cr_d.xpt |              |
| 07-08  | PP_E.XPT     | WTSB2YR    | BMX_E.XPT | BMXWT      | BMIWT     | WTMEC2YR | demo_e.xpt | alb_cr_e.xpt |              |
| 07-08  | UPHOPM_E.XPT | WTSC2YR    | BMX_E.XPT | BMXWT      | BMIWT     | WTMEC2YR | demo_e.xpt | alb_cr_e.xpt |              |
| 07-08  | EPH_E.XPT    | WTSB2YR    | BMX_E.XPT | BMXWT      | BMIWT     | WTMEC2YR | demo_e.xpt | alb_cr_e.xpt |              |
| 07-08  | PHTHTE_E.XPT | WTSB2YR    | BMX_E.XPT | BMXWT      | BMIWT     | WTMEC2YR | demo_e.xpt | alb_cr_e.xpt |              |
| 07-08  | PHYTO_E.XPT  | WTSB2YR    | BMX_E.XPT | BMXWT      | BMIWT     | WTMEC2YR | demo_e.xpt | alb_cr_e.xpt |              |
| 07-08  | DEET_E.XPT   | WTSC2YR    | BMX_E.XPT | BMXWT      | BMIWT     | WTMEC2YR | demo_e.xpt | alb_cr_e.xpt |              |
| 07-08  | OPD_E.XPT    | WTSC2YR    | BMX_E.XPT | BMXWT      | BMIWT     | WTMEC2YR | demo_e.xpt | alb_cr_e.xpt |              |
| 07-08  | PAH_E.XPT    | WTSB2YR    | BMX_E.XPT | BMXWT      | BMIWT     | WTMEC2YR | demo_e.xpt | alb_cr_e.xpt |              |
| 07-08  | UAS_E.XPT    | WTSA2YR    | BMX_E.XPT | BMXWT      | BMIWT     | WTMEC2YR | demo_e.xpt | alb_cr_e.xpt |              |
| 07-08  | UHM_E.XPT    | WTSA2YR    | BMX_E.XPT | BMXWT      | BMIWT     | WTMEC2YR | demo_e.xpt | alb_cr_e.xpt |              |
| 07-08  | UHG_E.XPT    | WTSA2YR    | BMX_E.XPT | BMXWT      | BMIWT     | WTMEC2YR | demo_e.xpt | alb_cr_e.xpt |              |
| 09-10  | DEET_F.XPT   | WTSC2YR    | BMX_F.XPT | BMXWT      | BMIWT     | WTMEC2YR | demo_f.xpt | alb_cr_f.xpt | ucflow_f.xpt |
| 09-10  | PERNT_F.XPT  | WTSA2YR    | BMX_F.XPT | BMXWT      | BMIWT     | WTMEC2YR | demo_f.xpt | alb_cr_f.xpt | ucflow_f.xpt |
| 09-10  | PAH_F.XPT    | WTSB2YR    | BMX_F.XPT | BMXWT      | BMIWT     | WTMEC2YR | demo_f.xpt | alb_cr_f.xpt | ucflow_f.xpt |
| 09-10  | UAS_F.XPT    | WTSA2YR    | BMX_F.XPT | BMXWT      | BMIWT     | WTMEC2YR | demo_f.xpt | alb_cr_f.xpt | ucflow_f.xpt |
| 09-10  | UHG_F.XPT    | WTSA2YR    | BMX_F.XPT | BMXWT      | BMIWT     | WTMEC2YR | demo_f.xpt | alb_cr_f.xpt | ucflow_f.xpt |
| 11-12  | SSFR_G.XPT   | WTSB2YR    | BMX_G.XPT | BMXWT      | BMIWT     | WTMEC2YR | demo_g.xpt | alb_cr_g.xpt | ucflow_g.xpt |
| 11-12  | PP_G.XPT     | WTSA2YR    | BMX_G.XPT | BMXWT      | BMIWT     | WTMEC2YR | demo_g.xpt | alb_cr_g.xpt | ucflow_g.xpt |
| 11-12  | UVOC_G.XPT   | WTSA2YR    | BMX_G.XPT | BMXWT      | BMIWT     | WTMEC2YR | demo_g.xpt | alb_cr_g.xpt | ucflow_g.xpt |
| 11-12  | UPHOPM_G.XPT | WTSC2YR    | BMX_G.XPT | BMXWT      | BMIWT     | WTMEC2YR | demo_g.xpt | alb_cr_g.xpt | ucflow_g.xpt |
| 11-12  | EPH_G.XPT    | WTSA2YR    | BMX_G.XPT | BMXWT      | BMIWT     | WTMEC2YR | demo_g.xpt | alb_cr_g.xpt | ucflow_g.xpt |
| 11-12  | DEET_G.XPT   | WTSC2YR    | BMX_G.XPT | BMXWT      | BMIWT     | WTMEC2YR | demo_g.xpt | alb_cr_g.xpt | ucflow_g.xpt |
| 11-12  | PERNT_G.XPT  | WTSA2YR    | BMX_G.XPT | BMXWT      | BMIWT     | WTMEC2YR | demo_g.xpt | alb_cr_g.xpt | ucflow_g.xpt |
| 11-12  | UHM_G.XPT    | WTSA2YR    | BMX_G.XPT | BMXWT      | BMIWT     | WTMEC2YR | demo_g.xpt | alb_cr_g.xpt | ucflow_g.xpt |
| 11-12  | UHG_G.XPT    | WTSA2YR    | BMX_G.XPT | BMXWT      | BMIWT     | WTMEC2YR | demo_g.xpt | alb_cr_g.xpt | ucflow_g.xpt |
| 13-14  | EPHPP_H.XPT  | WTSB2YR    | BMX_H.XPT | BMXWT      | BMIWT     | WTMEC2YR | demo_h.xpt | alb_cr_h.xpt | ucflow_h.xpt |
| 13-14  | PHTHTE_H.XPT | WTSB2YR    | BMX_H.XPT | BMXWT      | BMIWT     | WTMEC2YR | demo_h.xpt | alb_cr_h.xpt | ucflow_h.xpt |
| 13-14  | UVOC_H.XPT   | WTSA2YR    | BMX_H.XPT | BMXWT      | BMIWT     | WTMEC2YR | demo_h.xpt | alb_cr_h.xpt | ucflow_h.xpt |

| sample | file        | wtvariable | BWfile    | BWvariable | Bwcomment | Examwts  | demofile   | creatfile    | urineflow    |
|--------|-------------|------------|-----------|------------|-----------|----------|------------|--------------|--------------|
| 13-14  | PERNT_H.XPT | WTSA2YR    | BMX_H.XPT | BMXWT      | BMIWT     | WTMEC2YR | demo_h.xpt | alb_cr_h.xpt | ucflow_h.xpt |
| 13-14  | PAH_H.XPT   | WTSA2YR    | BMX_H.XPT | BMXWT      | BMIWT     | WTMEC2YR | demo_h.xpt | alb_cr_h.xpt | ucflow_h.xpt |
| 13-14  | UAS_H.XPT   | WTSA2YR    | BMX_H.XPT | BMXWT      | BMIWT     | WTMEC2YR | demo_h.xpt | alb_cr_h.xpt | ucflow_h.xpt |
| 13-14  | UM_H.XPT    | WTSA2YR    | BMX_H.XPT | BMXWT      | BMIWT     | WTMEC2YR | demo_h.xpt | alb_cr_h.xpt | ucflow_h.xpt |
| 13-14  | UHG_H.XPT   | WTSA2YR    | BMX_H.XPT | BMXWT      | BMIWT     | WTMEC2YR | demo_h.xpt | alb_cr_h.xpt | ucflow_h.xpt |
| 99-00  | PHPYPA.XPT  | WTSPH2YR   | BMX.XPT   | BMXWT      | BMIWT     | WTMEC2YR | demo.xpt   | lab16.xpt    |              |
| 99-00  | LAB06HM.XPT | WTSHM2YR   | BMX.XPT   | BMXWT      | BMIWT     | WTMEC2YR | demo.xpt   | lab16.xpt    |              |

Table S3. Table 3 of the bayesmarker input file, the parent-metabolite map.

Notes: Name, CAS, DTXSID, and MW are identifiers for parent chemicals and those ending with .1 are for metabolites. Abbreviations: Branch (equivalent to  $\phi$  in manuscript equations; 2 if parent is cleaved in half, 1 otherwise), MW (molecular weight)

| Name                     | CAS         | DTXSID        | Branch | MW       | Name.1                 | CAS.1       | DTXSID.1       | MW.1     |
|--------------------------|-------------|---------------|--------|----------|------------------------|-------------|----------------|----------|
| 4-Nitroanisole           | 100-17-4    | DTXSID9059208 | 1      | 153.136  | para-Nitrophenol       | 100-02-7    | DTXSID0021834  | 139.11   |
| 4-Aminophenol            | 123-30-8    | DTXSID3024499 | 1      | 109.127  | para-Nitrophenol       | 100-02-7    | DTXSID0021834  | 139.11   |
| Nitrofen                 | 1836-75-5   | DTXSID7020970 | 1      | 284.097  | para-Nitrophenol       | 100-02-7    | DTXSID0021834  | 139.11   |
| Chlornitrofen            | 1836-77-7   | DTXSID0041775 | 1      | 318.542  | para-Nitrophenol       | 100-02-7    | DTXSID0021834  | 139.11   |
| EPN                      | 2104-64-5   | DTXSID7022174 | 1      | 323.308  | para-Nitrophenol       | 100-02-7    | DTXSID0021834  | 139.11   |
| Methyl parathion         | 298-00-0    | DTXSID1020855 | 2      | 263.2    | para-Nitrophenol       | 100-02-7    | DTXSID0021834  | 139.11   |
| Parathion                | 56-38-2     | DTXSID7021100 | 1      | 291.3    | para-Nitrophenol       | 100-02-7    | DTXSID0021834  | 139.11   |
| Nitrobenzene             | 98-95-3     | DTXSID3020964 | 1      | 123.11   | para-Nitrophenol       | 100-02-7    | DTXSID0021834  | 139.11   |
| Triclocarban             | 101-20-2    | DTXSID4026214 | 1      | 315.58   | Triclocarban           | 101-20-2    | DTXSID4026214  | 315.58   |
| Acephate                 | 30560-19-1  | DTXSID8023846 | 1      | 183.167  | Methamidophos          | 10265-92-6  | DTXSID6024177  | 141.1302 |
| N,N-Dimethylformamid     | 68-12-2     | DTXSID6020515 | 1      | 73.095   | N-Acetyl-S-(N-methylc  | 103974-29-4 | DTXSID00146174 | 220.24   |
| 2-Amino-1-methyl-6-ph    | 105650-23-5 | DTXSID3037628 | 1      | 224.267  | 2-Amino-1-methyl-6-p   | 105650-23-5 | DTXSID3037628  | 224.267  |
| Ammonium ethyl phosp     | 1068-22-0   | DTXSID1058688 | 1      | 203.266  | Ammonium ethyl phos    | 1068-22-0   | DTXSID1058688  | 203.266  |
| Tri-n-butyl phosphate (T | 126-73-8    | DTXSID3021986 | 1      | 266.318  | Phosphoric acid, dibut | 107-66-4    | DTXSID3040728  | 210.21   |
| Malathion                | 121-75-5    | DTXSID4020791 | 1      | 330.4    | Dimethylthiophosphat   | 1112-38-5   | DTXSID10858736 | 142.11   |
| Fenitrothion             | 122-14-5    | DTXSID4032613 | 1      | 277.2    | Dimethylthiophosphat   | 1112-38-5   | DTXSID10858736 | 142.11   |
| Pirimiphos-methyl        | 29232-93-7  | DTXSID0024266 | 1      | 305.3    | Dimethylthiophosphat   | 1112-38-5   | DTXSID10858736 | 142.11   |
| Methyl parathion         | 298-00-0    | DTXSID1020855 | 1      | 263.2    | Dimethylthiophosphat   | 1112-38-5   | DTXSID10858736 | 142.11   |
| Oxydemeton-methyl        | 301-12-2    | DTXSID8025541 | 1      | 246.28   | Dimethylthiophosphat   | 1112-38-5   | DTXSID10858736 | 142.11   |
| Temephos                 | 3383-96-8   | DTXSID1032484 | 1      | 466.48   | Dimethylthiophosphat   | 1112-38-5   | DTXSID10858736 | 142.11   |
| Isazaphos-methyl         | 42509-83-1  | DTXSID8042058 | 1      | 313.74   | Dimethylthiophosphat   | 1112-38-5   | DTXSID10858736 | 142.11   |
| Fenthion                 | 55-38-9     | DTXSID8020620 | 1      | 278.3    | Dimethylthiophosphat   | 1112-38-5   | DTXSID10858736 | 142.11   |
| Chlorpyrifos-methyl      | 5598-13-0   | DTXSID6032352 | 1      | 322.52   | Dimethylthiophosphat   | 1112-38-5   | DTXSID10858736 | 142.11   |
| Dimethoate               | 60-51-5     | DTXSID7020479 | 1      | 229.2    | Dimethylthiophosphat   | 1112-38-5   | DTXSID10858736 | 142.11   |
| Phosmet                  | 732-11-6    | DTXSID5024261 | 1      | 317.32   | Dimethylthiophosphat   | 1112-38-5   | DTXSID10858736 | 142.11   |
| Azinphos methyl          | 86-50-0     | DTXSID3020122 | 1      | 317.3    | Dimethylthiophosphat   | 1112-38-5   | DTXSID10858736 | 142.11   |
| Methidathion             | 950-37-8    | DTXSID5020819 | 1      | 302.3    | Dimethylthiophosphat   | 1112-38-5   | DTXSID10858736 | 142.11   |
| Dimethoate               | 60-51-5     | DTXSID7020479 | 1      | 229.2    | Omethoate              | 1113-02-6   | DTXSID4037580  | 213.19   |
| Omethoate                | 1113-02-6   | DTXSID4037580 | 1      | 213.19   | Omethoate              | 1113-02-6   | DTXSID4037580  | 213.19   |
| Tetrachloroethene        | 127-18-4    | DTXSID2021319 | 1      | 165.82   | S-Trichlorovinyl-N-ace | 111348-61-9 | DTXSID20149602 | 292.56   |
| Nicosulfuron             | 111991-09-4 | DTXSID6034764 | 1      | 410.4092 | Nicosulfuron           | 111991-09-4 | DTXSID6034764  | 410.4092 |
| Alachlor                 | 15972-60-8  | DTXSID1022265 | 1      | 269.8    | Alachlor mercapturate  | 116482-92-9 | -              | 396.505  |
| Malathion                | 121-75-5    | DTXSID4020791 | 1      | 330.4    | Malathion dicarboxylic | 1190-28-9   | DTXSID7052739  | 274.253  |
| Ethyl paraben            | 120-47-8    | DTXSID9022528 | 1      | 166.175  | Ethyl paraben          | 120-47-8    | DTXSID9022528  | 166.175  |
| Nitrofen                 | 1836-75-5   | DTXSID7020970 | 1      | 284.097  | 2,4-Dichlorophenol     | 120-83-2    | DTXSID1020439  | 163      |
| Chlomethoxyfen           | 32861-85-1  | DTXSID6058055 | 1      | 314.1231 | 2,4-Dichlorophenol     | 120-83-2    | DTXSID1020439  | 163      |
| Prothiofos               | 34643-46-4  | DTXSID8042349 | 1      | 345.25   | 2,4-Dichlorophenol     | 120-83-2    | DTXSID1020439  | 163      |
| Phosdiphen               | 36519-00-3  | DTXSID0058069 | 1      | 416.023  | 2,4-Dichlorophenol     | 120-83-2    | DTXSID1020439  | 163      |
| Bifenox                  | 42576-02-3  | DTXSID1040320 | 1      | 342.133  | 2,4-Dichlorophenol     | 120-83-2    | DTXSID1020439  | 163      |
| 1,3-dichlorobenzene      | 541-73-1    | DTXSID6022056 | 1      | 147.004  | 2,4-Dichlorophenol     | 120-83-2    | DTXSID1020439  | 163      |
| 2,4-Dichlorophenoxyace   | 94-75-7     | DTXSID0020442 | 1      | 221      | 2,4-Dichlorophenol     | 120-83-2    | DTXSID1020439  | 163      |

| Name                               | CAS         | DTXSID        | Branch | MW         | Name.1                                  | CAS.1        | DTXSID.1       | MW.1     |
|------------------------------------|-------------|---------------|--------|------------|-----------------------------------------|--------------|----------------|----------|
| Dichlofenthion                     | 97-17-6     | DTXSID8040274 |        | 1 315.1557 | 2,4-Dichlorophenol                      | 120-83-2     | DTXSID1020439  | 163      |
| Rimsulfuron                        | 122931-48-0 | DTXSID1032642 |        | 1 431.44   | Rimsulfuron                             | 122931-48-0  | DTXSID1032642  | 431.44   |
| Trichloroethene                    | 79-01-6     | DTXSID0021383 |        | 1 131.38   | S-(2,2-Dichloroethenyl)                 | 126543-43-9  | DTXSID80925585 | 258.11   |
| Benzophenone-3                     | 131-57-7    | DTXSID3022405 |        | 1 228.246  | Benzophenone-3                          | 131-57-7     | DTXSID3022405  | 228.246  |
| Dibutyl phthalate                  | 84-74-2     | DTXSID2021781 |        | 1 278.3    | Mono-n-butyl phthalate                  | 131-70-4     | DTXSID4040002  | 222.2    |
| Benzylbutyl phthalate              | 85-68-7     | DTXSID3020205 |        | 1 312.37   | Mono-n-butyl phthalate                  | 131-70-4     | DTXSID4040002  | 222.2    |
| N,N-Diethyl-3-methylbenzamide      | 134-62-3    | DTXSID2021995 |        | 1 191.274  | N,N-Diethyl-3-methylbenzamide           | 134-62-3     | DTXSID2021995  | 191.274  |
| Naproanilide                       | 52570-16-8  | DTXSID8058118 |        | 1 291.348  | 2-Hydroxynaphthalene                    | 135-19-3     | DTXSID5027061  | 144.17   |
| Naphthalene                        | 91-20-3     | DTXSID8020913 |        | 1 128.18   | 2-Hydroxynaphthalene                    | 135-19-3     | DTXSID5027061  | 144.17   |
| Halosulfuron                       | 135397-30-7 | DTXSID3074947 |        | 1 420.78   | Halosulfuron                            | 135397-30-7  | DTXSID3074947  | 420.78   |
| Di-isodecyl phthalate              | 26761-40-0  | DTXSID4025082 |        | 1 446.67   | Mono-(carboxynonyl)                     | 1373125-93-9 | DTXSID60873156 | 336.384  |
| Atrazine                           | 1912-24-9   | DTXSID9020112 |        | 1 215.7    | Atrazine mercapturate                   | 138722-96-0  | DTXSID90160763 | 342.417  |
| Atrazine                           | 1912-24-9   | DTXSID9020112 |        | 1 215.7    | Atrazine                                | 1912-24-9    | DTXSID9020112  | 215.7    |
| 4-tert-Octylphenol                 | 140-66-9    | DTXSID9022360 |        | 1 206.327  | 4-tert-Octylphenol                      | 140-66-9     | DTXSID9022360  | 206.327  |
| Sulfosulfuron                      | 141776-32-1 | DTXSID4034940 |        | 1 470.4852 | Sulfosulfuron                           | 141776-32-1  | DTXSID4034940  | 470.4852 |
| 1-Bromopropane                     | 106-94-5    | DTXSID6021874 |        | 1 122.993  | N-Acetyl-S-(n-propyl)-l                 | 14402-54-1   | DTXSID50162602 | 205.27   |
| Oxasulfuron                        | 144651-06-9 | DTXSID4034364 |        | 1 406.41   | Oxasulfuron                             | 144651-06-9  | DTXSID4034364  | 406.41   |
| 1,3-Butadiene                      | 106-99-0    | DTXSID3020203 |        | 1 54.092   | S-(3,4-Dihydroxybutyl)                  | 144889-50-9  | DTXSID60932439 | 251.3    |
| Nitrate                            | 14797-55-8  | DTXSID5024217 |        | 1 62.005   | Nitrate                                 | 14797-55-8   | DTXSID5024217  | 62.005   |
| Perchlorate                        | 14797-73-0  | DTXSID6024252 |        | 1 99.45    | Perchlorate                             | 14797-73-0   | DTXSID6024252  | 99.45    |
| Acrylonitrile                      | 107-13-1    | DTXSID5020029 |        | 1 53.064   | N-Acetyl-S-(2-hydroxy-1-phenylethyl)    | 15060-26-1   | DTXSID00914077 |          |
| Ethylene Oxide                     | 75-21-8     | DTXSID0020600 |        | 1 44.053   | N-Acetyl-S-(2-hydroxy-1-phenylethyl)    | 15060-26-1   | DTXSID00914077 |          |
| Vinyl chloride                     | 75-01-4     | DTXSID8021434 |        | 1 62.5     | N-Acetyl-S-(2-hydroxy-1-phenylethyl)    | 15060-26-1   | DTXSID00914077 |          |
| Carbofuran                         | 1563-66-2   | DTXSID9020249 |        | 1 221.26   | Carbofuranphenol                        | 1563-38-8    | DTXSID2027414  | 164.2    |
| Carbosulfan                        | 55285-14-8  | DTXSID5023950 |        | 1 380.55   | Carbofuranphenol                        | 1563-38-8    | DTXSID2027414  | 164.2    |
| Furathiocarb                       | 65907-30-4  | DTXSID3052725 |        | 1 382.47   | Carbofuranphenol                        | 1563-38-8    | DTXSID2027414  | 164.2    |
| Benfuracarb                        | 82560-54-1  | DTXSID2041622 |        | 1 410.53   | Carbofuranphenol                        | 1563-38-8    | DTXSID2027414  | 164.2    |
| 1,3-Butadiene                      | 106-99-0    | DTXSID3020203 |        | 1 54.092   | N-Acetyl-S-(2-hydroxy-1-phenylethyl)    | 159092-64-5  | DTXSID70675527 | 233.28   |
| 1,3-Butadiene                      | 106-99-0    | DTXSID3020203 |        | 1 54.092   | N-Acetyl-S-(4-hydroxy-1-phenylethyl)    | 159092-65-6  | -              |          |
| Metolachlor                        | 51218-45-2  | DTXSID4022448 |        | 1 283.8    | Metolachlor mercapturate                | 159956-64-6  | -              | 410.532  |
| Tribenzyl phosphate (TB)           | 1707-92-2   | DTXSID3061897 |        | 1 368.369  | Dibenzyl phosphate                      | 1623-08-1    | DTXSID1033402  | 278.244  |
| Fluorene                           | 86-73-7     | DTXSID8024105 |        | 1 166.22   | 9-Hydroxyfluorene                       | 1689-64-1    | DTXSID4052683  | 182.22   |
| Foramsulfuron                      | 173159-57-4 | DTXSID7034753 |        | 1 452.44   | Foramsulfuron                           | 173159-57-4  | DTXSID7034753  | 452.44   |
| Di-isononyl phthalate              | 28553-12-0  | DTXSID4022521 |        | 1 418.61   | Mono-(carboxyoctyl) p                   | 1923895-92-4 | DTXSID00873155 | 418.61   |
| Toulene                            | 108-88-3    | DTXSID7021360 |        | 1 92.141   | N-Acetyl-S-(benzyl)-L-c                 | 19542-77-9   | DTXSID90894753 | 253.32   |
| Mesosulfuron-methyl                | 208465-21-8 | DTXSID6034712 |        | 1 503.5    | Mesosulfuron-methyl                     | 208465-21-8  | DTXSID6034712  | 503.5    |
| Carbon disulfide                   | 75-15-0     | DTXSID6023947 |        | 1 76.13    | 2-Sulfanyl-4,5-dihydro-1H-benzothiazole | 20933-67-9   | DTXSID20943223 | 163.21   |
| Propineb                           | 12071-83-9  | DTXSID1052741 |        | 1 289.75   | 4-Methylimidazolidine                   | 2122-19-2    | DTXSID3052694  | 116.18   |
| Daidzein                           | 486-66-8    | DTXSID9022310 |        | 1 254.241  | O-Desmethygangolensin                   | 21255-69-6   | DTXSID40873154 | 258.273  |
| Trichloroethene                    | 79-01-6     | DTXSID0021383 |        | 1 131.38   | N-Acetyl-S-(1,2-dichloroethyl)          | 2148-31-4    | -              |          |
| Diethyl phthalate                  | 84-66-2     | DTXSID7021780 |        | 1 222.24   | Mono-ethyl phthalate                    | 2306-33-4    | DTXSID3052696  | 194.18   |
| Acrolein                           | 107-02-8    | DTXSID5020023 |        | 1 56.064   | S-(3-Hydroxypropyl)cy                   | 23127-40-4   | DTXSID30904325 | 221.27   |
| Phenanthrene                       | 85-01-8     | DTXSID6024254 |        | 1 178.24   | 1-Hydroxyphenanthrene                   | 2433-56-9    | DTXSID90872758 | 194.23   |
| Fluorene                           | 86-73-7     | DTXSID8024105 |        | 1 166.22   | 2-Hydroxyfluorene                       | 2443-58-5    | DTXSID2047569  | 182.22   |
| 9H-Pyrido[3,4-b]indole (Quinoline) | 244-63-3    | DTXSID2021070 |        | 1 168.199  | 9H-Pyrido[3,4-b]indole                  | 244-63-3     | DTXSID2021070  | 168.199  |



| Name                      | CAS         | DTXSID         | Branch | MW        | Name.1                  | CAS.1       | DTXSID.1        | MW.1     |
|---------------------------|-------------|----------------|--------|-----------|-------------------------|-------------|-----------------|----------|
| Benzylbutyl phthalate     | 85-68-7     | DTXSID3020205  |        | 1 312.37  | Mono-benzyl phthalat    | 2528-16-7   | DTXSID9043938   | 256.25   |
| 2-Amino-9H-pyrido[2,3-    | 26148-68-5  | DTXSID7020001  |        | 1 183.214 | 2-Amino-9H-pyrido[2,;   | 26148-68-5  | DTXSID7020001   | 183.214  |
| Xylene                    | 1330-20-7   | DTXSID2021446  |        | 1 106.16  | 3-Methylhippuric acid   | 27115-49-7  | DTXSID90181579  | 193.202  |
| 2-Ethylhexyl-2,3,4,5-tetr | 183658-27-7 | DTXSID9052686  |        | 1 549.923 | 2,3,4,5-Tetrabromobe    | 27581-13-1  | DTXSID201016690 | 437.707  |
| Diazinon                  | 333-41-5    | DTXSID9020407  |        | 1 304.34  | 2-Isopropyl-6-methyl-   | 2814-20-2   | DTXSID1027502   | 152.197  |
| Di-isononyl phthalate     | 28553-12-0  | DTXSID4022521  |        | 1 418.61  | Mono-oxoisonyl pht      | 297182-83-3 | DTXSID201027637 |          |
| Terbufos                  | 13071-79-9  | DTXSID2022254  |        | 1 288.44  | O,O-Diethyl dithiopho:  | 298-06-6    | DTXSID6027133   | 186.22   |
| Phorate                   | 298-02-2    | DTXSID4032459  |        | 1 260.36  | O,O-Diethyl dithiopho:  | 298-06-6    | DTXSID6027133   | 186.22   |
| Disulfoton                | 298-04-4    | DTXSID0022018  |        | 1 274.4   | O,O-Diethyl dithiopho:  | 298-06-6    | DTXSID6027133   | 186.22   |
| Ethion                    | 563-12-2    | DTXSID2024086  |        | 1 384.46  | O,O-Diethyl dithiopho:  | 298-06-6    | DTXSID6027133   | 186.22   |
| Thiocyanate               | 302-04-5    | DTXSID8047763  |        | 1 58.08   | Thiocyanate             | 302-04-5    | DTXSID8047763   | 58.08    |
| Cyanide                   | 57-12-5     | DTXSID6023991  |        | 1 26.019  | Thiocyanate             | 302-04-5    | DTXSID8047763   | 58.08    |
| Tris(2-chloroethyl) phosj | 115-96-8    | DTXSID5021411  |        | 1 285.48  | Bis(2-chloroethyl) pho: | 3040-56-0   | DTXSID50184485  | 222.99   |
| Acephate                  | 30560-19-1  | DTXSID8023846  |        | 1 183.167 | Acephate                | 30560-19-1  | DTXSID8023846   | 183.167  |
| Di-isobutyl phthalate     | 84-69-5     | DTXSID9022522  |        | 1 278.34  | Mono-isobutyl phthala   | 30833-53-5  | DTXSID5052701   | 226.26   |
| Crotonaldehyde            | 4170-30-3   | DTXSID8024864  |        | 1 70.091  | N-Acetyl-S-(3-hydroxyj  | 33164-70-4  | DTXSID601027639 |          |
| Triclosan                 | 3380-34-5   | DTXSID5032498  |        | 1 289.544 | Triclosan               | 3380-34-5   | DTXSID5032498   | 289.544  |
| Cypermethrin              | 52315-07-8  | DTXSID1023998  |        | 2 416.3   | 3-Phenoxybenzoic acic   | 3739-38-6   | DTXSID1038321   | 214.22   |
| Permethrin                | 52645-53-1  | DTXSID8022292  |        | 2 391.3   | 3-Phenoxybenzoic acic   | 3739-38-6   | DTXSID1038321   | 214.22   |
| Deltamethrin              | 52918-63-5  | DTXSID8020381  |        | 1 505.2   | 3-Phenoxybenzoic acic   | 3739-38-6   | DTXSID1038321   | 214.22   |
| Cyanide                   | 57-12-5     | DTXSID6023991  |        | 1 26.019  | 2-Aminothiazoline-4-c:  | 40283-41-8  | DTXSID90363550  | 144.15   |
| Di-2-ethylhexyl phthalat  | 117-81-7    | DTXSID5020607  |        | 1 390.6   | Mono-(2-ethyl-5-oxoh    | 40321-98-0  | DTXSID00865994  | 292.327  |
| Di-2-ethylhexyl phthalat  | 117-81-7    | DTXSID5020607  |        | 1 390.6   | Mono-(2-ethyl-5-hydr    | 40321-99-1  | DTXSID50873160  | 294.3429 |
| Di-2-ethylhexyl phthalat  | 117-81-7    | DTXSID5020607  |        | 1 390.6   | Mono-(2-ethyl-5-carbc   | 40809-41-4  | DTXSID20873152  | 308.3264 |
| Xylene                    | 1330-20-7   | DTXSID2021446  |        | 1 106.16  | 2-Methylhippuric acid   | 42013-20-7  | DTXSID60194818  | 193.202  |
| Dimethyl phthalate        | 131-11-3    | DTXSID3022455  |        | 1 194.2   | Mono-methyl phthalat    | 4376-18-5   | DTXSID9040001   | 180.2    |
| Di-2-ethylhexyl phthalat  | 117-81-7    | DTXSID5020607  |        | 1 390.6   | Mono-2-ethylhexyl ph    | 4376-20-9   | DTXSID2025680   | 278.38   |
| Genistein                 | 446-72-0    | DTXSID5022308  |        | 1 270.24  | Genistein               | 446-72-0    | DTXSID5022308   | 270.24   |
| Benzene                   | 71-43-2     | DTXSID3039242  |        | 1 78.114  | N-Acetyl-S-(phenyl)-L-  | 4775-80-8   | DTXSID10905052  | 239.29   |
| Propoxur                  | 114-26-1    | DTXSID7021948  |        | 1 209.245 | 2-Isopropoxyphenol      | 4812-20-8   | DTXSID5041431   | 152.193  |
| Daidzein                  | 486-66-8    | DTXSID9022310  |        | 1 254.241 | Daidzein                | 486-66-8    | DTXSID9022310   | 254.241  |
| 1-Methyl-9H-pyrido[3,4-   | 486-84-0    | DTXSID80197568 |        | 1 182.226 | 1-Methyl-9H-pyrido[3,   | 486-84-0    | DTXSID80197568  | 182.226  |
| Acrolein                  | 107-02-8    | DTXSID5020023  |        | 1 56.064  | N-Acetyl-S-(2-carboxy   | 51868-61-2  | DTXSID60966198  | 235.25   |
| Di-isononyl phthalate     | 28553-12-0  | DTXSID4022521  |        | 1 418.61  | Mono-isononyl phthal:   | 519056-28-1 | DTXSID20873157  | 418.61   |
| Pyrene                    | 129-00-0    | DTXSID3024289  |        | 1 202.26  | 1-Hydroxypyrene         | 5315-79-7   | DTXSID1038298   | 218.25   |
| Deltamethrin              | 52918-63-5  | DTXSID8020381  |        | 2 505.2   | cis-3-(2,2-Dibromovin   | 53179-78-5  | DTXSID40873159  | 297.97   |
| Daidzein                  | 486-66-8    | DTXSID9022310  |        | 1 254.241 | Equol                   | 531-95-3    | DTXSID0022309   | 242.274  |
| Di-n-octyl phthalate      | 117-84-0    | DTXSID1021956  |        | 1 390.57  | Octyl hydrogen phthal:  | 5393-19-1   | DTXSID4052714   | 278.348  |
| Di-2-ethylhexyl phthalat  | 117-81-7    | DTXSID5020607  |        | 1 390.6   | Octyl hydrogen phthal:  | 5393-19-1   | DTXSID4052714   | 278.348  |
| Cypermethrin              | 52315-07-8  | DTXSID1023998  |        | 1 416.3   | trans-3-(2,2-Dichlorovi | 55701-03-6  | DTXSID9052717   | 209.07   |
| Permethrin                | 52645-53-1  | DTXSID8022292  |        | 1 391.3   | trans-3-(2,2-Dichlorovi | 55701-03-6  | DTXSID9052717   | 209.07   |
| Cyfluthrin                | 68359-37-5  | DTXSID5035957  |        | 1 434.3   | trans-3-(2,2-Dichlorovi | 55701-03-6  | DTXSID9052717   | 209.07   |
| Cypermethrin              | 52315-07-8  | DTXSID1023998  |        | 1 416.3   | cis-3-(2,2-Dichlorovin  | 55701-05-8  | DTXSID5028039   | 209.07   |
| Permethrin                | 52645-53-1  | DTXSID8022292  |        | 1 391.3   | cis-3-(2,2-Dichlorovin  | 55701-05-8  | DTXSID5028039   | 209.07   |
| Cyfluthrin                | 68359-37-5  | DTXSID5035957  |        | 1 434.3   | cis-3-(2,2-Dichlorovin  | 55701-05-8  | DTXSID5028039   | 209.07   |

| Name                      | CAS        | DTXSID        | Branch | MW         | Name.1                         | CAS.1       | DTXSID.1       | MW.1     |
|---------------------------|------------|---------------|--------|------------|--------------------------------|-------------|----------------|----------|
| para-Dichlorobenzene      | 106-46-7   | DTXSID1020431 |        | 1 147.01   | 2,5-Dichlorophenol             | 583-78-8    | DTXSID7025003  | 163      |
| Phosphorothioic acid      | 5871-17-0  | DTXSID4052718 |        | 1 208.258  | Phosphorothioic acid           | 5871-17-0   | DTXSID4052718  | 208.258  |
| Terbufos                  | 13071-79-9 | DTXSID2022254 |        | 1 288.44   | Diethylphosphate               | 598-02-7    | DTXSID1044699  | 154.1    |
| Chlorpyrifos              | 2921-88-2  | DTXSID4020458 |        | 1 350.59   | Diethylphosphate               | 598-02-7    | DTXSID1044699  | 154.1    |
| Phorate                   | 298-02-2   | DTXSID4032459 |        | 1 260.36   | Diethylphosphate               | 598-02-7    | DTXSID1044699  | 154.1    |
| Disulfoton                | 298-04-4   | DTXSID0022018 |        | 1 274.4    | Diethylphosphate               | 598-02-7    | DTXSID1044699  | 154.1    |
| Diazinon                  | 333-41-5   | DTXSID9020407 |        | 1 304.34   | Diethylphosphate               | 598-02-7    | DTXSID1044699  | 154.1    |
| Sulfotepp                 | 3689-24-5  | DTXSID7024328 |        | 1 322.34   | Diethylphosphate               | 598-02-7    | DTXSID1044699  | 154.1    |
| Chlorethoxyphos           | 54593-83-8 | DTXSID2032344 |        | 1 336      | Diethylphosphate               | 598-02-7    | DTXSID1044699  | 154.1    |
| Parathion                 | 56-38-2    | DTXSID7021100 |        | 1 291.3    | Diethylphosphate               | 598-02-7    | DTXSID1044699  | 154.1    |
| Coumaphos                 | 56-72-4    | DTXSID2020347 |        | 1 362.8    | Diethylphosphate               | 598-02-7    | DTXSID1044699  | 154.1    |
| Ethion                    | 563-12-2   | DTXSID2024086 |        | 1 384.46   | Diethylphosphate               | 598-02-7    | DTXSID1044699  | 154.1    |
| Phenanthrene              | 85-01-8    | DTXSID6024254 |        | 1 178.24   | 2-Hydroxyphenanthrene          | 605-55-0    | DTXSID8052722  | 194.07   |
| Phenanthrene              | 85-01-8    | DTXSID6024254 |        | 1 178.24   | 3-Hydroxyphenanthrene          | 605-87-8    | DTXSID3052723  | 194.23   |
| Ethylbenzene              | 100-41-4   | DTXSID3020596 |        | 1 106.168  | Phenylglyoxylic acid           | 611-73-4    | DTXSID80209993 | 150.133  |
| Styrene                   | 100-42-5   | DTXSID2021284 |        | 1 104.152  | Phenylglyoxylic acid           | 611-73-4    | DTXSID80209993 | 150.133  |
| 3-Amino-1,4-dimethyl-5    | 62450-06-0 | DTXSID0043767 |        | 1 211.268  | 3-Amino-1,4-dimethyl-          | 62450-06-0  | DTXSID0043767  | 211.268  |
| 1-Methyl-3-amino-5H-p     | 62450-07-1 | DTXSID5043768 |        | 1 197.241  | 1-Methyl-3-amino-5H-           | 62450-07-1  | DTXSID5043768  | 197.241  |
| Fluorene                  | 86-73-7    | DTXSID8024105 |        | 1 166.22   | 3-Hydroxyfluorene              | 6344-67-8   | DTXSID9047540  | 182.2179 |
| Chlorsulfuron             | 64902-72-3 | DTXSID7023980 |        | 1 357.7768 | Chlorsulfuron                  | 64902-72-3  | DTXSID7023980  | 357.7768 |
| Chlorpyrifos              | 2921-88-2  | DTXSID4020458 |        | 1 350.59   | 3,5,6-Trichloro-2-pyrid        | 6515-38-4   | DTXSID7038317  | 198.43   |
| Chlorpyrifos-methyl       | 5598-13-0  | DTXSID6032352 |        | 1 322.52   | 3,5,6-Trichloro-2-pyrid        | 6515-38-4   | DTXSID7038317  | 198.43   |
| Fospirate                 | 5598-52-7  | DTXSID6037512 |        | 1 306.46   | 3,5,6-Trichloro-2-pyrid        | 6515-38-4   | DTXSID7038317  | 198.43   |
| Di-n-octyl phthalate      | 117-84-0   | DTXSID1021956 |        | 1 390.57   | Mono-(3-carboxypropyl)         | 66851-46-5  | DTXSID8052726  | 250.2042 |
| Acetochlor                | 34256-82-1 | DTXSID8023848 |        | 1 269.8    | Acetochlor mercaptur           | 674808-38-9 | DTXSID70904324 | 414      |
| 2-Amino-6-methyldipyr     | 67730-11-4 | DTXSID5020657 |        | 1 198.229  | 2-Amino-6-methyldipy           | 67730-11-4  | DTXSID5020657  | 198.229  |
| 2-Aminodipyrdo[1,2-a      | 67730-10-3 | DTXSID0020658 |        | 1 184.202  | 2-Aminodipyrdo[1,2-a           | 67730-10-3  | DTXSID0020658  | 184.202  |
| 2-Amino-3-methyl-9H-p     | 68006-83-7 | DTXSID5043766 |        | 1 197.241  | 2-Amino-3-methyl-9H-           | 68006-83-7  | DTXSID5043766  | 197.241  |
| N,N-Diethyl-3-methylbe    | 134-62-3   | DTXSID2021995 |        | 1 191.274  | N,N-Diethyl-3-(hydroxyl)       | 72236-22-7  | DTXSID70222550 | 207.273  |
| Sulfometuron-methyl       | 74222-97-2 | DTXSID0034936 |        | 1 364.38   | Sulfometuron-methyl            | 74222-97-2  | DTXSID0034936  | 364.38   |
| Metsulfuron-methyl        | 74223-64-6 | DTXSID6023864 |        | 1 381.36   | Metsulfuron-methyl             | 74223-64-6  | DTXSID6023864  | 381.36   |
| Acrylonitrile             | 107-13-1   | DTXSID5020029 |        | 1 53.064   | N-Acetyl-S-(2-cyanoethyl)      | 74514-75-3  | DTXSID70996027 | 216.26   |
| Dicyclohexyl phthalate    | 84-61-7    | DTXSID5025021 |        | 1 330.42   | Mono-cyclohexyl phthalate      | 7517-36-4   | DTXSID3052729  | 248.2744 |
| Malathion                 | 121-75-5   | DTXSID4020791 |        | 1 330.4    | Dimethyldithiophosphate        | 756-80-9    | DTXSID5027306  | 158.18   |
| Dimethoate                | 60-51-5    | DTXSID7020479 |        | 1 229.2    | Dimethyldithiophosphate        | 756-80-9    | DTXSID5027306  | 158.18   |
| Dimethoate                | 60-51-5    | DTXSID7020479 |        | 1 229.2    | Dimethoate                     | 60-51-5     | DTXSID7020479  | 229.2    |
| Phosmet                   | 732-11-6   | DTXSID5024261 |        | 1 317.32   | Dimethyldithiophosphate        | 756-80-9    | DTXSID5027306  | 158.18   |
| Azinphos methyl           | 86-50-0    | DTXSID3020122 |        | 1 317.3    | Dimethyldithiophosphate        | 756-80-9    | DTXSID5027306  | 158.18   |
| Methidathion              | 950-37-8   | DTXSID5020819 |        | 1 302.3    | Dimethyldithiophosphate        | 756-80-9    | DTXSID5027306  | 158.18   |
| 4-(methylnitrosamino)-1   | 64091-91-4 | DTXSID3020881 |        | 1 207.233  | NNAL (4-(methylnitrosamino)-   | 76014-81-8  | DTXSID8020880  | 209.249  |
| 2-Amino-3-methyl-3H-ir    | 76180-96-6 | DTXSID4020745 |        | 1 198.229  | 2-Amino-3-methyl-3H-           | 76180-96-6  | DTXSID4020745  | 198.229  |
| Phenanthrene              | 85-01-8    | DTXSID6024254 |        | 1 178.24   | 4-Hydroxyphenanthrene          | 7651-86-7   | DTXSID30227324 | 194.23   |
| Cyfluthrin                | 68359-37-5 | DTXSID5035957 |        | 2 434.3    | 4-Fluoro-3-phenoxybenzoic acid | 77279-89-1  | DTXSID00228005 | 232.207  |
| Enterolactone             | 78473-71-9 | DTXSID0048183 |        | 1 298.338  | Enterolactone                  | 78473-71-9  | DTXSID0048183  | 298.338  |
| Tris(1-chloro-2-propyl) p | 13674-84-5 | DTXSID5026259 |        | 1 327.56   | Bis(1-Chloropropan-2-yl)       | 789440-10-4 | DTXSID90274172 | 251.04   |

| Name                     | CAS        | DTXSID        | Branch | MW         | Name.1                  | CAS.1       | DTXSID.1       | MW.1     |
|--------------------------|------------|---------------|--------|------------|-------------------------|-------------|----------------|----------|
| Thifensulfuron methyl    | 79277-27-3 | DTXSID1024124 |        | 1 387.39   | Thifensulfuron methyl   | 79277-27-3  | DTXSID1024124  | 387.39   |
| Bisphenol A              | 80-05-7    | DTXSID7020182 |        | 1 228.291  | Bisphenol A             | 80-05-7     | DTXSID7020182  | 228.291  |
| Bisphenol F              | 620-92-8   | DTXSID9022445 |        | 1 200.237  | Bisphenol F             | 620-92-8    | DTXSID9022445  | 200.237  |
| Bisphenol S              | 80-09-1    | DTXSID3022409 |        | 1 250.27   | Bisphenol S             | 80-09-1     | DTXSID3022409  | 250.27   |
| Enterodiol               | 80226-00-2 | DTXSID0047876 |        | 1 302.37   | Enterodiol              | 80226-00-2  | DTXSID0047876  | 302.37   |
| Malathion                | 121-75-5   | DTXSID4020791 |        | 1 330.4    | Dimethylphosphate       | 813-78-5    | DTXSID5025150  | 126.05   |
| Fenitrothion             | 122-14-5   | DTXSID4032613 |        | 1 277.2    | Dimethylphosphate       | 813-78-5    | DTXSID5025150  | 126.05   |
| Dicrotophos              | 141-66-2   | DTXSID9023914 |        | 1 237.2    | Dimethylphosphate       | 813-78-5    | DTXSID5025150  | 126.05   |
| Tetrachlorvinphos        | 22248-79-9 | DTXSID1032648 |        | 1 365.9606 | Dimethylphosphate       | 813-78-5    | DTXSID5025150  | 126.05   |
| Pirimiphos-methyl        | 29232-93-7 | DTXSID0024266 |        | 1 305.3    | Dimethylphosphate       | 813-78-5    | DTXSID5025150  | 126.05   |
| Methyl parathion         | 298-00-0   | DTXSID1020855 |        | 1 263.2    | Dimethylphosphate       | 813-78-5    | DTXSID5025150  | 126.05   |
| Naled                    | 300-76-5   | DTXSID1024209 |        | 1 380.78   | Dimethylphosphate       | 813-78-5    | DTXSID5025150  | 126.05   |
| Oxydemeton-methyl        | 301-12-2   | DTXSID8025541 |        | 1 246.28   | Dimethylphosphate       | 813-78-5    | DTXSID5025150  | 126.05   |
| Temephos                 | 3383-96-8  | DTXSID1032484 |        | 1 466.48   | Dimethylphosphate       | 813-78-5    | DTXSID5025150  | 126.05   |
| Isazaphos-methyl         | 42509-83-1 | DTXSID8042058 |        | 1 313.74   | Dimethylphosphate       | 813-78-5    | DTXSID5025150  | 126.05   |
| Trichlorfon              | 52-68-6    | DTXSID0021389 |        | 1 257.4362 | Dimethylphosphate       | 813-78-5    | DTXSID5025150  | 126.05   |
| Fenthion                 | 55-38-9    | DTXSID8020620 |        | 1 278.3    | Dimethylphosphate       | 813-78-5    | DTXSID5025150  | 126.05   |
| Chlorpyrifos-methyl      | 5598-13-0  | DTXSID6032352 |        | 1 322.52   | Dimethylphosphate       | 813-78-5    | DTXSID5025150  | 126.05   |
| Dimethoate               | 60-51-5    | DTXSID7020479 |        | 1 229.2    | Dimethylphosphate       | 813-78-5    | DTXSID5025150  | 126.05   |
| Dichlorvos               | 62-73-7    | DTXSID5020449 |        | 1 221      | Dimethylphosphate       | 813-78-5    | DTXSID5025150  | 126.05   |
| Phosmet                  | 732-11-6   | DTXSID5024261 |        | 1 317.32   | Dimethylphosphate       | 813-78-5    | DTXSID5025150  | 126.05   |
| Azinphos methyl          | 86-50-0    | DTXSID3020122 |        | 1 317.3    | Dimethylphosphate       | 813-78-5    | DTXSID5025150  | 126.05   |
| Methidathion             | 950-37-8   | DTXSID5020819 |        | 1 302.3    | Dimethylphosphate       | 813-78-5    | DTXSID5025150  | 126.05   |
| Acrylamide               | 79-06-1    | DTXSID5020027 |        | 1 71.079   | N-Acetyl-S-(3-amino-3   | 81690-92-8  | DTXSID30920489 | 234.27   |
| Triasulfuron             | 82097-50-5 | DTXSID0024345 |        | 1 401.82   | Triasulfuron            | 82097-50-5  | DTXSID0024345  | 401.82   |
| Metsulfuron-methyl       | 82197-07-7 | DTXSID6023864 |        | 1 381.3675 | Metsulfuron-methyl      | 82197-07-7  | DTXSID6023864  | 381.3675 |
| Bensulfuron-methyl       | 83055-99-6 | DTXSID7024164 |        | 1 410.4    | Bensulfuron-methyl      | 83055-99-6  | DTXSID7024164  | 410.4    |
| Triphenyl phosphate (TP  | 115-86-6   | DTXSID1021952 |        | 1 326.288  | Diphenyl phosphate      | 838-85-7    | DTXSID1048207  | 250.19   |
| Tri-p-cresylphosphate (T | 78-32-0    | DTXSID5052676 |        | 1 368.369  | Phosphoric acid, bis(4- | 843-24-3    | DTXSID70233262 | 278.244  |
| N,N-Diethyl-3-methylbe   | 134-62-3   | DTXSID2021995 |        | 1 191.274  | 3-(Diethylcarbamoyl) t  | 858981-15-4 |                |          |
| Primisulfuron-methyl     | 86209-51-0 | DTXSID8032463 |        | 1 468.34   | Primisulfuron-methyl    | 86209-51-0  | DTXSID8032463  | 468.34   |
| Hexachlorobenzene        | 118-74-1   | DTXSID2020682 |        | 1 284.78   | Pentachlorophenol       | 87-86-5     | DTXSID7021106  | 266.34   |
| beta-Hexachlorocyclohe   | 319-85-7   | DTXSID7020685 |        | 1 290.83   | Pentachlorophenol       | 87-86-5     | DTXSID7021106  | 266.34   |
| Lindane                  | 58-89-9    | DTXSID2020686 |        | 1 290.8    | Pentachlorophenol       | 87-86-5     | DTXSID7021106  | 266.34   |
| Hexachlorocyclohexane    | 608-73-1   | DTXSID7020687 |        | 1 290.83   | Pentachlorophenol       | 87-86-5     | DTXSID7021106  | 266.34   |
| Pentachloronitrobenzen   | 82-68-8    | DTXSID2021105 |        | 1 295.336  | Pentachlorophenol       | 87-86-5     | DTXSID7021106  | 266.34   |
| Pentachlorophenol        | 87-86-5    | DTXSID7021106 |        | 1 266.34   | Pentachlorophenol       | 87-86-5     | DTXSID7021106  | 266.34   |
| 1,3,5-Trichlorobenzene   | 108-70-3   | DTXSID8026195 |        | 1 181.449  | 2,4,6-Trichlorophenol   | 88-06-2     | DTXSID5021386  | 197.45   |
| Hexachlorobenzene        | 118-74-1   | DTXSID2020682 |        | 1 284.78   | 2,4,6-Trichlorophenol   | 88-06-2     | DTXSID5021386  | 197.45   |
| Chlornitrofen            | 1836-77-7  | DTXSID0041775 |        | 1 318.542  | 2,4,6-Trichlorophenol   | 88-06-2     | DTXSID5021386  | 197.45   |
| beta-Hexachlorocyclohe   | 319-85-7   | DTXSID7020685 |        | 1 290.83   | 2,4,6-Trichlorophenol   | 88-06-2     | DTXSID5021386  | 197.45   |
| Lindane                  | 58-89-9    | DTXSID2020686 |        | 1 290.8    | 2,4,6-Trichlorophenol   | 88-06-2     | DTXSID5021386  | 197.45   |
| Hexachlorocyclohexane    | 608-73-1   | DTXSID7020687 |        | 1 290.83   | 2,4,6-Trichlorophenol   | 88-06-2     | DTXSID5021386  | 197.45   |
| Pentachloronitrobenzen   | 82-68-8    | DTXSID2021105 |        | 1 295.336  | 2,4,6-Trichlorophenol   | 88-06-2     | DTXSID5021386  | 197.45   |
| Pentachlorophenol        | 87-86-5    | DTXSID7021106 |        | 1 266.34   | 2,4,6-Trichlorophenol   | 88-06-2     | DTXSID5021386  | 197.45   |

| Name                    | CAS        | DTXSID        | Branch | MW         | Name.1                 | CAS.1      | DTXSID.1       | MW.1     |
|-------------------------|------------|---------------|--------|------------|------------------------|------------|----------------|----------|
| Carbaryl                | 63-25-2    | DTXSID9020247 |        | 1 201.224  | 1-Hydroxynapthalene    | 90-15-3    | DTXSID6021793  | 144.17   |
| Napthalene              | 91-20-3    | DTXSID8020913 |        | 1 128.18   | 1-Hydroxynapthalene    | 90-15-3    | DTXSID6021793  | 144.17   |
| ortho-Phenylphenol      | 90-43-7    | DTXSID2021151 |        | 1 170.21   | ortho-Phenylphenol     | 90-43-7    | DTXSID2021151  | 170.21   |
| Styrene                 | 100-42-5   | DTXSID2021284 |        | 1 104.152  | Mandelic Acid          | 90-64-2    | DTXSID6023234  | 152.149  |
| Ethylbenzene            | 100-41-4   | DTXSID3020596 |        | 1 106.168  | Mandelic Acid          | 90-64-2    | DTXSID6023234  | 152.149  |
| Propylene oxide         | 75-56-9    | DTXSID5021207 |        | 1 58.08    | N-Acetyl-S-(2-hydroxy) | 923-43-3   | DTXSID50919259 | 221.27   |
| 2,4,5-Trichlorophenoxya | 93-76-5    | DTXSID5021388 |        | 1 255.4835 | 2,4,5-Trichlorophenoxy | 93-76-5    | DTXSID5021388  | 255.4835 |
| Prosulfuron             | 94125-34-5 | DTXSID9034868 |        | 1 419.382  | Prosulfuron            | 94125-34-5 | DTXSID9034868  | 419.382  |
| n-propyl paraben        | 94-13-3    | DTXSID4022527 |        | 1 180.202  | n-propyl paraben       | 94-13-3    | DTXSID4022527  | 180.202  |
| Butyl paraben           | 94-26-8    | DTXSID3020209 |        | 1 194.2286 | Butyl paraben          | 94-26-8    | DTXSID3020209  | 194.2286 |
| 2,4-Dichlorophenoxya    | 94-75-7    | DTXSID0020442 |        | 1 221      | 2,4-Dichlorophenoxya   | 94-75-7    | DTXSID0020442  | 221      |
| Hexachlorobenzene       | 118-74-1   | DTXSID2020682 |        | 1 284.78   | 2,4,5-Trichlorophenol  | 95-95-4    | DTXSID4024359  | 197.45   |
| 1,2,4-Trichlorobenzene  | 120-82-1   | DTXSID0021965 |        | 1 181.449  | 2,4,5-Trichlorophenol  | 95-95-4    | DTXSID4024359  | 197.45   |
| Fenchlorphos            | 299-84-3   | DTXSID2034885 |        | 1 321.5472 | 2,4,5-Trichlorophenol  | 95-95-4    | DTXSID4024359  | 197.45   |
| beta-Hexachlorocyclohe  | 319-85-7   | DTXSID7020685 |        | 1 290.83   | 2,4,5-Trichlorophenol  | 95-95-4    | DTXSID4024359  | 197.45   |
| Trichloronate           | 327-98-0   | DTXSID9038420 |        | 1 333.602  | 2,4,5-Trichlorophenol  | 95-95-4    | DTXSID4024359  | 197.45   |
| Lindane                 | 58-89-9    | DTXSID2020686 |        | 1 290.8    | 2,4,5-Trichlorophenol  | 95-95-4    | DTXSID4024359  | 197.45   |
| Hexachlorocyclohexane   | 608-73-1   | DTXSID7020687 |        | 1 290.83   | 2,4,5-Trichlorophenol  | 95-95-4    | DTXSID4024359  | 197.45   |
| Pentachloronitrobenzen  | 82-68-8    | DTXSID2021105 |        | 1 295.336  | 2,4,5-Trichlorophenol  | 95-95-4    | DTXSID4024359  | 197.45   |
| Pentachlorophenol       | 87-86-5    | DTXSID7021106 |        | 1 266.34   | 2,4,5-Trichlorophenol  | 95-95-4    | DTXSID4024359  | 197.45   |
| Zineb                   | 12122-67-7 | DTXSID5021465 |        | 1 277.7752 | Ethylene thiourea      | 96-45-7    | DTXSID5020601  | 102.1604 |
| Maneb                   | 12427-38-2 | DTXSID9020794 |        | 1 267.3232 | Ethylene thiourea      | 96-45-7    | DTXSID5020601  | 102.1604 |
| Nabam                   | 142-59-6   | DTXSID5020603 |        | 1 256.349  | Ethylene thiourea      | 96-45-7    | DTXSID5020601  | 102.1604 |
| Amobam                  | 3566-10-7  | DTXSID0058067 |        | 1 246.447  | Ethylene thiourea      | 96-45-7    | DTXSID5020601  | 102.1604 |
| Mancozeb                | 8018-01-7  | DTXSID0034695 |        | 1 2718.46  | Ethylene thiourea      | 96-45-7    | DTXSID5020601  | 102.1604 |
| Metiram                 | 9006-42-2  | DTXSID9034737 |        | 1 275.773  | Ethylene thiourea      | 96-45-7    | DTXSID5020601  | 102.1604 |
| Ethylene thiourea       | 96-45-7    | DTXSID5020601 |        | 1 102.1604 | Ethylene thiourea      | 96-45-7    | DTXSID5020601  | 102.1604 |
| Ethametsulfuron-methy   | 97780-06-8 | DTXSID9034573 |        | 1 410.41   | Ethametsulfuron-mett   | 97780-06-8 | DTXSID9034573  | 410.41   |
| Methyl paraben          | 99-76-3    | DTXSID4022529 |        | 1 152.1482 | Methyl paraben         | 99-76-3    | DTXSID4022529  | 152.1482 |
| Dimethylarsinic acid    | 75-60-5    | DTXSID7020508 |        | 1 137.998  | Dimethylarsinic acid   | 75-60-5    | DTXSID7020508  | 137.998  |
| Trimethylarsine oxide   | 4964-14-1  | DTXSID1021401 |        | 1 136.026  | Trimethylarsine oxide  | 4964-14-1  | DTXSID1021401  | 136.026  |
| Antimony                | 7440-36-0  | DTXSID5023879 |        | 1 121.76   | Antimony               | 7440-36-0  | DTXSID5023879  | 121.76   |
| Barium                  | 7440-39-3  | DTXSID8023894 |        | 1 137.327  | Barium                 | 7440-39-3  | DTXSID8023894  | 137.327  |
| Beryllium               | 7440-41-7  | DTXSID4023913 |        | 1 9.012183 | Beryllium              | 7440-41-7  | DTXSID4023913  | 9.012183 |
| Cadmium                 | 7440-43-9  | DTXSID1023940 |        | 1 112.414  | Cadmium                | 7440-43-9  | DTXSID1023940  | 112.414  |
| Lead                    | 7439-92-1  | DTXSID2024161 |        | 1 207.2    | Lead                   | 7439-92-1  | DTXSID2024161  | 207.2    |
| Manganese               | 7439-96-5  | DTXSID2024169 |        | 1 54.93804 | Manganese              | 7439-96-5  | DTXSID2024169  | 54.93804 |
| Mercury                 | 7439-97-6  | DTXSID1024172 |        | 1 200.59   | Mercury                | 7439-97-6  | DTXSID1024172  | 200.59   |
| Molybdenum              | 7439-98-7  | DTXSID1024207 |        | 1 95.95    | Molybdenum             | 7439-98-7  | DTXSID1024207  | 95.95    |
| Strontium               | 7440-24-6  | DTXSID3024312 |        | 1 87.62    | Strontium              | 7440-24-6  | DTXSID3024312  | 87.62    |
| Arsenic acid            | 7778-39-4  | DTXSID1034341 |        | 1 141.942  | Arsenic acid           | 7778-39-4  | DTXSID1034341  | 141.942  |
| Thallium                | 7440-28-0  | DTXSID2036035 |        | 1 204.38   | Thallium               | 7440-28-0  | DTXSID2036035  | 204.38   |
| Cesium                  | 7440-46-2  | DTXSID5036767 |        | 1 132.9055 | Cesium                 | 7440-46-2  | DTXSID5036767  | 132.9055 |
| Uranium                 | 7440-61-1  | DTXSID1042522 |        | 1 238.0289 | Uranium                | 7440-61-1  | DTXSID1042522  | 238.0289 |
| Tin                     | 7440-31-5  | DTXSID1049801 |        | 1 118.71   | Tin                    | 7440-31-5  | DTXSID1049801  | 118.71   |

| Name          | CAS        | DTXSID         | Branch | MW        | Name.1        | CAS.1      | DTXSID.1       | MW.1    |
|---------------|------------|----------------|--------|-----------|---------------|------------|----------------|---------|
| Tungsten      | 7440-33-7  | DTXSID8052481  |        | 1 183.84  | Tungsten      | 7440-33-7  | DTXSID8052481  | 183.84  |
| Arsenobetaine | 64436-13-1 | DTXSID0052833  |        | 1 178.063 | Arsenobetaine | 64436-13-1 | DTXSID0052833  | 178.063 |
| Arsenous acid | 13464-58-9 | DTXSID7074828  |        | 1 125.943 | Arsenous acid | 13464-58-9 | DTXSID7074828  | 125.943 |
| Arsenocholine | 39895-81-3 | DTXSID80873153 |        | 1 165.087 | Arsenocholine | 39895-81-3 | DTXSID80873153 | 165.087 |

Table S4. Exposure estimates in mg/kg/day (median and 95% credible intervals) for all parent chemicals using the most recent NHANES phase concentration data of the metabolites.

| DTXSID        | Name                 | CAS      | Population         | Phase | Median_Exposure | Low95    | Up95     |
|---------------|----------------------|----------|--------------------|-------|-----------------|----------|----------|
| DTXSID3020596 | Ethylbenzene         | 100-41-4 | Total              | 15-16 | 8.30E-05        | 2.17E-08 | 4.02E-03 |
| DTXSID3020596 | Ethylbenzene         | 100-41-4 | Male               | 15-16 | 2.99E-04        | 3.67E-08 | 4.58E-03 |
| DTXSID3020596 | Ethylbenzene         | 100-41-4 | Female             | 15-16 | 2.51E-04        | 4.66E-08 | 3.73E-03 |
| DTXSID3020596 | Ethylbenzene         | 100-41-4 | 3 - 5 years        | 15-16 | 4.34E-04        | 4.73E-08 | 8.25E-03 |
| DTXSID3020596 | Ethylbenzene         | 100-41-4 | 6 - 11 years       | 15-16 | 2.93E-04        | 3.62E-08 | 5.57E-03 |
| DTXSID3020596 | Ethylbenzene         | 100-41-4 | 12 - 19 years      | 15-16 | 3.28E-04        | 5.50E-08 | 3.57E-03 |
| DTXSID3020596 | Ethylbenzene         | 100-41-4 | 20 - 65 years      | 15-16 | 1.09E-04        | 2.47E-08 | 4.13E-03 |
| DTXSID3020596 | Ethylbenzene         | 100-41-4 | 66 years and older | 15-16 | 2.99E-04        | 6.59E-08 | 3.31E-03 |
| DTXSID3020596 | Ethylbenzene         | 100-41-4 | ReproAgeFemale     | 15-16 | 2.68E-04        | 3.13E-08 | 3.84E-03 |
| DTXSID3020596 | Ethylbenzene         | 100-41-4 | BMI <= 30          | 15-16 | 4.00E-04        | 1.24E-07 | 4.44E-03 |
| DTXSID3020596 | Ethylbenzene         | 100-41-4 | BMI > 30           | 15-16 | 1.79E-04        | 3.40E-08 | 3.36E-03 |
| DTXSID2021284 | Styrene              | 100-42-5 | Total              | 15-16 | 7.02E-04        | 3.44E-07 | 3.96E-03 |
| DTXSID2021284 | Styrene              | 100-42-5 | Male               | 15-16 | 1.68E-04        | 5.54E-08 | 4.47E-03 |
| DTXSID2021284 | Styrene              | 100-42-5 | Female             | 15-16 | 1.59E-04        | 1.76E-08 | 3.65E-03 |
| DTXSID2021284 | Styrene              | 100-42-5 | 3 - 5 years        | 15-16 | 3.29E-04        | 3.71E-08 | 8.07E-03 |
| DTXSID2021284 | Styrene              | 100-42-5 | 6 - 11 years       | 15-16 | 2.27E-04        | 4.42E-08 | 5.46E-03 |
| DTXSID2021284 | Styrene              | 100-42-5 | 12 - 19 years      | 15-16 | 1.11E-04        | 2.65E-08 | 3.47E-03 |
| DTXSID2021284 | Styrene              | 100-42-5 | 20 - 65 years      | 15-16 | 5.18E-04        | 1.89E-07 | 4.09E-03 |
| DTXSID2021284 | Styrene              | 100-42-5 | 66 years and older | 15-16 | 9.23E-05        | 2.65E-08 | 3.21E-03 |
| DTXSID2021284 | Styrene              | 100-42-5 | ReproAgeFemale     | 15-16 | 1.19E-04        | 1.82E-08 | 3.76E-03 |
| DTXSID2021284 | Styrene              | 100-42-5 | BMI <= 30          | 15-16 | 1.38E-04        | 2.72E-08 | 4.35E-03 |
| DTXSID2021284 | Styrene              | 100-42-5 | BMI > 30           | 15-16 | 1.34E-04        | 2.40E-08 | 3.29E-03 |
| DTXSID4026214 | Triclocarban         | 101-20-2 | Total              | 15-16 | 1.04E-06        | 6.24E-07 | 1.41E-06 |
| DTXSID4026214 | Triclocarban         | 101-20-2 | Male               | 15-16 | 1.07E-06        | 6.63E-07 | 1.42E-06 |
| DTXSID4026214 | Triclocarban         | 101-20-2 | Female             | 15-16 | 1.04E-06        | 6.08E-07 | 1.42E-06 |
| DTXSID4026214 | Triclocarban         | 101-20-2 | 3 - 5 years        | 15-16 | 1.01E-06        | 4.88E-07 | 1.44E-06 |
| DTXSID4026214 | Triclocarban         | 101-20-2 | 6 - 11 years       | 15-16 | 1.12E-06        | 6.67E-07 | 1.49E-06 |
| DTXSID4026214 | Triclocarban         | 101-20-2 | 12 - 19 years      | 15-16 | 1.01E-06        | 5.02E-07 | 1.44E-06 |
| DTXSID4026214 | Triclocarban         | 101-20-2 | 20 - 65 years      | 15-16 | 1.04E-06        | 6.12E-07 | 1.45E-06 |
| DTXSID4026214 | Triclocarban         | 101-20-2 | 66 years and older | 15-16 | 1.33E-06        | 8.86E-07 | 1.64E-06 |
| DTXSID4026214 | Triclocarban         | 101-20-2 | ReproAgeFemale     | 15-16 | 9.85E-07        | 5.29E-07 | 1.41E-06 |
| DTXSID4026214 | Triclocarban         | 101-20-2 | BMI <= 30          | 15-16 | 9.81E-07        | 5.64E-07 | 1.38E-06 |
| DTXSID4026214 | Triclocarban         | 101-20-2 | BMI > 30           | 15-16 | 1.20E-06        | 7.65E-07 | 1.56E-06 |
| DTXSID1020431 | para-Dichlorobenzene | 106-46-7 | Total              | 15-16 | 4.19E-05        | 3.88E-05 | 4.54E-05 |
| DTXSID1020431 | para-Dichlorobenzene | 106-46-7 | Male               | 15-16 | 4.63E-05        | 3.63E-05 | 5.94E-05 |
| DTXSID1020431 | para-Dichlorobenzene | 106-46-7 | Female             | 15-16 | 3.78E-05        | 2.87E-05 | 5.04E-05 |
| DTXSID1020431 | para-Dichlorobenzene | 106-46-7 | 3 - 5 years        | 15-16 | 1.16E-04        | 7.32E-05 | 1.89E-04 |
| DTXSID1020431 | para-Dichlorobenzene | 106-46-7 | 6 - 11 years       | 15-16 | 8.11E-05        | 5.26E-05 | 1.27E-04 |
| DTXSID1020431 | para-Dichlorobenzene | 106-46-7 | 12 - 19 years      | 15-16 | 6.15E-05        | 4.27E-05 | 8.87E-05 |
| DTXSID1020431 | para-Dichlorobenzene | 106-46-7 | 20 - 65 years      | 15-16 | 3.86E-05        | 2.83E-05 | 5.21E-05 |
| DTXSID1020431 | para-Dichlorobenzene | 106-46-7 | 66 years and older | 15-16 | 2.83E-05        | 2.14E-05 | 3.72E-05 |
| DTXSID1020431 | para-Dichlorobenzene | 106-46-7 | ReproAgeFemale     | 15-16 | 4.41E-05        | 3.72E-05 | 5.24E-05 |
| DTXSID1020431 | para-Dichlorobenzene | 106-46-7 | BMI <= 30          | 15-16 | 4.33E-05        | 3.95E-05 | 4.76E-05 |

|               |                      |          |                    |       |          |          |          |
|---------------|----------------------|----------|--------------------|-------|----------|----------|----------|
| DTXSID1020431 | para-Dichlorobenzene | 106-46-7 | BMI > 30           | 15-16 | 3.93E-05 | 3.41E-05 | 4.54E-05 |
| DTXSID6021874 | 1-Bromopropane       | 106-94-5 | Total              | 15-16 | 3.40E-05 | 3.23E-05 | 3.60E-05 |
| DTXSID6021874 | 1-Bromopropane       | 106-94-5 | Male               | 15-16 | 3.76E-05 | 3.28E-05 | 4.34E-05 |
| DTXSID6021874 | 1-Bromopropane       | 106-94-5 | Female             | 15-16 | 3.08E-05 | 2.73E-05 | 3.47E-05 |
| DTXSID6021874 | 1-Bromopropane       | 106-94-5 | 3 - 5 years        | 15-16 | 4.33E-05 | 3.61E-05 | 5.22E-05 |
| DTXSID6021874 | 1-Bromopropane       | 106-94-5 | 6 - 11 years       | 15-16 | 3.21E-05 | 2.62E-05 | 3.91E-05 |
| DTXSID6021874 | 1-Bromopropane       | 106-94-5 | 12 - 19 years      | 15-16 | 2.73E-05 | 2.35E-05 | 3.17E-05 |
| DTXSID6021874 | 1-Bromopropane       | 106-94-5 | 20 - 65 years      | 15-16 | 4.06E-05 | 3.59E-05 | 4.64E-05 |
| DTXSID6021874 | 1-Bromopropane       | 106-94-5 | 66 years and older | 15-16 | 1.77E-05 | 1.50E-05 | 2.09E-05 |
| DTXSID6021874 | 1-Bromopropane       | 106-94-5 | ReproAgeFemale     | 15-16 | 4.22E-05 | 3.71E-05 | 4.79E-05 |
| DTXSID6021874 | 1-Bromopropane       | 106-94-5 | BMI <= 30          | 15-16 | 3.55E-05 | 3.35E-05 | 3.79E-05 |
| DTXSID6021874 | 1-Bromopropane       | 106-94-5 | BMI > 30           | 15-16 | 3.13E-05 | 2.86E-05 | 3.43E-05 |
| DTXSID3020203 | 1,3-Butadiene        | 106-99-0 | Total              | 15-16 | 1.20E-03 | 1.18E-03 | 1.22E-03 |
| DTXSID3020203 | 1,3-Butadiene        | 106-99-0 | Male               | 15-16 | 1.33E-03 | 1.28E-03 | 1.38E-03 |
| DTXSID3020203 | 1,3-Butadiene        | 106-99-0 | Female             | 15-16 | 1.09E-03 | 1.06E-03 | 1.13E-03 |
| DTXSID3020203 | 1,3-Butadiene        | 106-99-0 | 3 - 5 years        | 15-16 | 2.92E-03 | 2.76E-03 | 3.09E-03 |
| DTXSID3020203 | 1,3-Butadiene        | 106-99-0 | 6 - 11 years       | 15-16 | 1.77E-03 | 1.70E-03 | 1.83E-03 |
| DTXSID3020203 | 1,3-Butadiene        | 106-99-0 | 12 - 19 years      | 15-16 | 1.16E-03 | 1.09E-03 | 1.23E-03 |
| DTXSID3020203 | 1,3-Butadiene        | 106-99-0 | 20 - 65 years      | 15-16 | 1.14E-03 | 1.11E-03 | 1.18E-03 |
| DTXSID3020203 | 1,3-Butadiene        | 106-99-0 | 66 years and older | 15-16 | 1.02E-03 | 9.81E-04 | 1.07E-03 |
| DTXSID3020203 | 1,3-Butadiene        | 106-99-0 | ReproAgeFemale     | 15-16 | 1.06E-03 | 1.03E-03 | 1.10E-03 |
| DTXSID3020203 | 1,3-Butadiene        | 106-99-0 | BMI <= 30          | 15-16 | 1.32E-03 | 1.29E-03 | 1.35E-03 |
| DTXSID3020203 | 1,3-Butadiene        | 106-99-0 | BMI > 30           | 15-16 | 9.96E-04 | 9.71E-04 | 1.02E-03 |
| DTXSID5020023 | Acrolein             | 107-02-8 | Total              | 15-16 | 1.52E-03 | 1.48E-03 | 1.56E-03 |
| DTXSID5020023 | Acrolein             | 107-02-8 | Male               | 15-16 | 1.81E-03 | 1.69E-03 | 1.94E-03 |
| DTXSID5020023 | Acrolein             | 107-02-8 | Female             | 15-16 | 1.28E-03 | 1.19E-03 | 1.39E-03 |
| DTXSID5020023 | Acrolein             | 107-02-8 | 3 - 5 years        | 15-16 | 3.06E-03 | 2.87E-03 | 3.26E-03 |
| DTXSID5020023 | Acrolein             | 107-02-8 | 6 - 11 years       | 15-16 | 1.95E-03 | 1.82E-03 | 2.09E-03 |
| DTXSID5020023 | Acrolein             | 107-02-8 | 12 - 19 years      | 15-16 | 1.21E-03 | 1.12E-03 | 1.31E-03 |
| DTXSID5020023 | Acrolein             | 107-02-8 | 20 - 65 years      | 15-16 | 1.59E-03 | 1.48E-03 | 1.71E-03 |
| DTXSID5020023 | Acrolein             | 107-02-8 | 66 years and older | 15-16 | 1.09E-03 | 9.69E-04 | 1.23E-03 |
| DTXSID5020023 | Acrolein             | 107-02-8 | ReproAgeFemale     | 15-16 | 1.41E-03 | 1.33E-03 | 1.49E-03 |
| DTXSID5020023 | Acrolein             | 107-02-8 | BMI <= 30          | 15-16 | 1.64E-03 | 1.59E-03 | 1.69E-03 |
| DTXSID5020023 | Acrolein             | 107-02-8 | BMI > 30           | 15-16 | 1.30E-03 | 1.24E-03 | 1.36E-03 |
| DTXSID5020029 | Acrylonitrile        | 107-13-1 | Total              | 15-16 | 8.41E-06 | 7.74E-06 | 9.16E-06 |
| DTXSID5020029 | Acrylonitrile        | 107-13-1 | Male               | 15-16 | 1.17E-05 | 9.56E-06 | 1.42E-05 |
| DTXSID5020029 | Acrylonitrile        | 107-13-1 | Female             | 15-16 | 6.13E-06 | 5.03E-06 | 7.51E-06 |
| DTXSID5020029 | Acrylonitrile        | 107-13-1 | 3 - 5 years        | 15-16 | 1.12E-05 | 1.03E-05 | 1.21E-05 |
| DTXSID5020029 | Acrylonitrile        | 107-13-1 | 6 - 11 years       | 15-16 | 6.67E-06 | 5.67E-06 | 7.83E-06 |
| DTXSID5020029 | Acrylonitrile        | 107-13-1 | 12 - 19 years      | 15-16 | 4.93E-06 | 4.10E-06 | 5.97E-06 |
| DTXSID5020029 | Acrylonitrile        | 107-13-1 | 20 - 65 years      | 15-16 | 1.12E-05 | 9.08E-06 | 1.38E-05 |
| DTXSID5020029 | Acrylonitrile        | 107-13-1 | 66 years and older | 15-16 | 4.38E-06 | 3.45E-06 | 5.63E-06 |
| DTXSID5020029 | Acrylonitrile        | 107-13-1 | ReproAgeFemale     | 15-16 | 8.67E-06 | 7.12E-06 | 1.06E-05 |
| DTXSID5020029 | Acrylonitrile        | 107-13-1 | BMI <= 30          | 15-16 | 8.41E-06 | 7.63E-06 | 9.29E-06 |
| DTXSID5020029 | Acrylonitrile        | 107-13-1 | BMI > 30           | 15-16 | 8.42E-06 | 7.30E-06 | 9.79E-06 |
| DTXSID7021360 | Toulene              | 108-88-3 | Total              | 15-16 | 4.00E-05 | 3.89E-05 | 4.12E-05 |
| DTXSID7021360 | Toulene              | 108-88-3 | Male               | 15-16 | 4.28E-05 | 4.03E-05 | 4.56E-05 |

|               |                           |          |                    |       |          |          |          |
|---------------|---------------------------|----------|--------------------|-------|----------|----------|----------|
| DTXSID7021360 | Toulene                   | 108-88-3 | Female             | 15-16 | 3.75E-05 | 3.52E-05 | 4.00E-05 |
| DTXSID7021360 | Toulene                   | 108-88-3 | 3 - 5 years        | 15-16 | 1.17E-04 | 1.08E-04 | 1.26E-04 |
| DTXSID7021360 | Toulene                   | 108-88-3 | 6 - 11 years       | 15-16 | 5.60E-05 | 5.10E-05 | 6.15E-05 |
| DTXSID7021360 | Toulene                   | 108-88-3 | 12 - 19 years      | 15-16 | 3.32E-05 | 3.03E-05 | 3.64E-05 |
| DTXSID7021360 | Toulene                   | 108-88-3 | 20 - 65 years      | 15-16 | 3.92E-05 | 3.71E-05 | 4.14E-05 |
| DTXSID7021360 | Toulene                   | 108-88-3 | 66 years and older | 15-16 | 3.34E-05 | 3.16E-05 | 3.54E-05 |
| DTXSID7021360 | Toulene                   | 108-88-3 | ReproAgeFemale     | 15-16 | 3.83E-05 | 3.59E-05 | 4.09E-05 |
| DTXSID7021360 | Toulene                   | 108-88-3 | BMI <= 30          | 15-16 | 4.43E-05 | 4.28E-05 | 4.59E-05 |
| DTXSID7021360 | Toulene                   | 108-88-3 | BMI > 30           | 15-16 | 3.25E-05 | 3.09E-05 | 3.42E-05 |
| DTXSID5020607 | Di-2-ethylhexyl phthalate | 117-81-7 | Total              | 15-16 | 4.07E-04 | 4.00E-04 | 4.15E-04 |
| DTXSID5020607 | Di-2-ethylhexyl phthalate | 117-81-7 | Male               | 15-16 | 4.33E-04 | 4.09E-04 | 4.59E-04 |
| DTXSID5020607 | Di-2-ethylhexyl phthalate | 117-81-7 | Female             | 15-16 | 3.84E-04 | 3.72E-04 | 3.96E-04 |
| DTXSID5020607 | Di-2-ethylhexyl phthalate | 117-81-7 | 3 - 5 years        | 15-16 | 2.13E-03 | 2.05E-03 | 2.21E-03 |
| DTXSID5020607 | Di-2-ethylhexyl phthalate | 117-81-7 | 6 - 11 years       | 15-16 | 9.70E-04 | 9.29E-04 | 1.01E-03 |
| DTXSID5020607 | Di-2-ethylhexyl phthalate | 117-81-7 | 12 - 19 years      | 15-16 | 3.49E-04 | 3.34E-04 | 3.66E-04 |
| DTXSID5020607 | Di-2-ethylhexyl phthalate | 117-81-7 | 20 - 65 years      | 15-16 | 3.77E-04 | 3.64E-04 | 3.90E-04 |
| DTXSID5020607 | Di-2-ethylhexyl phthalate | 117-81-7 | 66 years and older | 15-16 | 2.78E-04 | 2.61E-04 | 2.97E-04 |
| DTXSID5020607 | Di-2-ethylhexyl phthalate | 117-81-7 | ReproAgeFemale     | 15-16 | 3.80E-04 | 3.66E-04 | 3.95E-04 |
| DTXSID5020607 | Di-2-ethylhexyl phthalate | 117-81-7 | BMI <= 30          | 15-16 | 4.56E-04 | 4.46E-04 | 4.67E-04 |
| DTXSID5020607 | Di-2-ethylhexyl phthalate | 117-81-7 | BMI > 30           | 15-16 | 3.22E-04 | 3.14E-04 | 3.31E-04 |
| DTXSID1021956 | Di-n-octyl phthalate      | 117-84-0 | Total              | 15-16 | 2.64E-05 | 2.53E-05 | 2.75E-05 |
| DTXSID1021956 | Di-n-octyl phthalate      | 117-84-0 | Male               | 15-16 | 2.96E-05 | 2.49E-05 | 3.54E-05 |
| DTXSID1021956 | Di-n-octyl phthalate      | 117-84-0 | Female             | 15-16 | 2.37E-05 | 2.05E-05 | 2.76E-05 |
| DTXSID1021956 | Di-n-octyl phthalate      | 117-84-0 | 3 - 5 years        | 15-16 | 1.42E-04 | 1.26E-04 | 1.61E-04 |
| DTXSID1021956 | Di-n-octyl phthalate      | 117-84-0 | 6 - 11 years       | 15-16 | 6.63E-05 | 5.96E-05 | 7.43E-05 |
| DTXSID1021956 | Di-n-octyl phthalate      | 117-84-0 | 12 - 19 years      | 15-16 | 2.62E-05 | 2.14E-05 | 3.27E-05 |
| DTXSID1021956 | Di-n-octyl phthalate      | 117-84-0 | 20 - 65 years      | 15-16 | 2.39E-05 | 2.05E-05 | 2.80E-05 |
| DTXSID1021956 | Di-n-octyl phthalate      | 117-84-0 | 66 years and older | 15-16 | 1.74E-05 | 1.49E-05 | 2.03E-05 |
| DTXSID1021956 | Di-n-octyl phthalate      | 117-84-0 | ReproAgeFemale     | 15-16 | 2.25E-05 | 2.06E-05 | 2.48E-05 |
| DTXSID1021956 | Di-n-octyl phthalate      | 117-84-0 | BMI <= 30          | 15-16 | 2.82E-05 | 2.68E-05 | 2.97E-05 |
| DTXSID1021956 | Di-n-octyl phthalate      | 117-84-0 | BMI > 30           | 15-16 | 2.31E-05 | 2.16E-05 | 2.49E-05 |
| DTXSID9022528 | Ethyl paraben             | 120-47-8 | Total              | 15-16 | 1.13E-05 | 9.88E-06 | 1.30E-05 |
| DTXSID9022528 | Ethyl paraben             | 120-47-8 | Male               | 15-16 | 6.07E-06 | 3.78E-06 | 9.80E-06 |
| DTXSID9022528 | Ethyl paraben             | 120-47-8 | Female             | 15-16 | 2.34E-05 | 1.62E-05 | 3.40E-05 |
| DTXSID9022528 | Ethyl paraben             | 120-47-8 | 3 - 5 years        | 15-16 | 1.99E-05 | 9.86E-06 | 4.09E-05 |
| DTXSID9022528 | Ethyl paraben             | 120-47-8 | 6 - 11 years       | 15-16 | 7.49E-06 | 3.80E-06 | 1.48E-05 |
| DTXSID9022528 | Ethyl paraben             | 120-47-8 | 12 - 19 years      | 15-16 | 5.97E-06 | 3.61E-06 | 1.01E-05 |
| DTXSID9022528 | Ethyl paraben             | 120-47-8 | 20 - 65 years      | 15-16 | 1.56E-05 | 9.61E-06 | 2.55E-05 |
| DTXSID9022528 | Ethyl paraben             | 120-47-8 | 66 years and older | 15-16 | 1.55E-05 | 1.07E-05 | 1.87E-05 |
| DTXSID9022528 | Ethyl paraben             | 120-47-8 | ReproAgeFemale     | 15-16 | 2.88E-05 | 2.29E-05 | 3.69E-05 |
| DTXSID9022528 | Ethyl paraben             | 120-47-8 | BMI <= 30          | 15-16 | 1.53E-05 | 1.31E-05 | 1.79E-05 |
| DTXSID9022528 | Ethyl paraben             | 120-47-8 | BMI > 30           | 15-16 | 6.22E-06 | 4.83E-06 | 8.04E-06 |
| DTXSID2021319 | Tetrachloroethene         | 127-18-4 | Total              | 15-16 | 1.50E-07 | 1.48E-09 | 2.73E-06 |
| DTXSID2021319 | Tetrachloroethene         | 127-18-4 | Male               | 15-16 | 1.76E-07 | 1.33E-09 | 3.05E-06 |
| DTXSID2021319 | Tetrachloroethene         | 127-18-4 | Female             | 15-16 | 1.71E-07 | 1.55E-09 | 3.21E-06 |
| DTXSID2021319 | Tetrachloroethene         | 127-18-4 | 3 - 5 years        | 15-16 | 3.15E-07 | 2.26E-09 | 5.16E-06 |
| DTXSID2021319 | Tetrachloroethene         | 127-18-4 | 6 - 11 years       | 15-16 | 3.38E-07 | 2.74E-09 | 5.56E-06 |



|               |                   |            |                    |       |          |          |          |
|---------------|-------------------|------------|--------------------|-------|----------|----------|----------|
| DTXSID2021319 | Tetrachloroethene | 127-18-4   | 12 - 19 years      | 15-16 | 2.83E-07 | 1.99E-09 | 5.49E-06 |
| DTXSID2021319 | Tetrachloroethene | 127-18-4   | 20 - 65 years      | 15-16 | 1.94E-07 | 1.15E-09 | 3.51E-06 |
| DTXSID2021319 | Tetrachloroethene | 127-18-4   | 66 years and older | 15-16 | 2.35E-07 | 1.95E-09 | 4.71E-06 |
| DTXSID2021319 | Tetrachloroethene | 127-18-4   | ReproAgeFemale     | 15-16 | 2.19E-07 | 1.55E-09 | 4.41E-06 |
| DTXSID2021319 | Tetrachloroethene | 127-18-4   | BMI <= 30          | 15-16 | 1.58E-07 | 1.57E-09 | 2.82E-06 |
| DTXSID2021319 | Tetrachloroethene | 127-18-4   | BMI > 30           | 15-16 | 1.99E-07 | 1.69E-09 | 3.81E-06 |
| DTXSID3024289 | Pyrene            | 129-00-0   | Total              | 15-16 | 1.69E-06 | 1.63E-06 | 1.76E-06 |
| DTXSID3024289 | Pyrene            | 129-00-0   | Male               | 15-16 | 1.89E-06 | 1.69E-06 | 2.12E-06 |
| DTXSID3024289 | Pyrene            | 129-00-0   | Female             | 15-16 | 1.52E-06 | 1.40E-06 | 1.66E-06 |
| DTXSID3024289 | Pyrene            | 129-00-0   | 3 - 5 years        | 15-16 | 5.13E-06 | 4.66E-06 | 5.67E-06 |
| DTXSID3024289 | Pyrene            | 129-00-0   | 6 - 11 years       | 15-16 | 3.03E-06 | 2.76E-06 | 3.34E-06 |
| DTXSID3024289 | Pyrene            | 129-00-0   | 12 - 19 years      | 15-16 | 1.71E-06 | 1.51E-06 | 1.94E-06 |
| DTXSID3024289 | Pyrene            | 129-00-0   | 20 - 65 years      | 15-16 | 1.81E-06 | 1.62E-06 | 2.02E-06 |
| DTXSID3024289 | Pyrene            | 129-00-0   | 66 years and older | 15-16 | 7.40E-07 | 6.21E-07 | 8.84E-07 |
| DTXSID3024289 | Pyrene            | 129-00-0   | ReproAgeFemale     | 15-16 | 1.97E-06 | 1.82E-06 | 2.11E-06 |
| DTXSID3024289 | Pyrene            | 129-00-0   | BMI <= 30          | 15-16 | 1.87E-06 | 1.78E-06 | 1.97E-06 |
| DTXSID3024289 | Pyrene            | 129-00-0   | BMI > 30           | 15-16 | 1.40E-06 | 1.32E-06 | 1.49E-06 |
| DTXSID3022405 | Benzophenone-3    | 131-57-7   | Total              | 15-16 | 3.02E-04 | 2.78E-04 | 3.28E-04 |
| DTXSID3022405 | Benzophenone-3    | 131-57-7   | Male               | 15-16 | 2.12E-04 | 1.75E-04 | 2.57E-04 |
| DTXSID3022405 | Benzophenone-3    | 131-57-7   | Female             | 15-16 | 4.24E-04 | 3.37E-04 | 5.28E-04 |
| DTXSID3022405 | Benzophenone-3    | 131-57-7   | 3 - 5 years        | 15-16 | 8.63E-04 | 5.12E-04 | 1.51E-03 |
| DTXSID3022405 | Benzophenone-3    | 131-57-7   | 6 - 11 years       | 15-16 | 4.82E-04 | 3.46E-04 | 6.88E-04 |
| DTXSID3022405 | Benzophenone-3    | 131-57-7   | 12 - 19 years      | 15-16 | 2.19E-04 | 1.60E-04 | 3.02E-04 |
| DTXSID3022405 | Benzophenone-3    | 131-57-7   | 20 - 65 years      | 15-16 | 3.17E-04 | 2.57E-04 | 3.94E-04 |
| DTXSID3022405 | Benzophenone-3    | 131-57-7   | 66 years and older | 15-16 | 2.14E-04 | 1.50E-04 | 3.03E-04 |
| DTXSID3022405 | Benzophenone-3    | 131-57-7   | ReproAgeFemale     | 15-16 | 4.72E-04 | 3.95E-04 | 5.69E-04 |
| DTXSID3022405 | Benzophenone-3    | 131-57-7   | BMI <= 30          | 15-16 | 3.47E-04 | 3.16E-04 | 3.82E-04 |
| DTXSID3022405 | Benzophenone-3    | 131-57-7   | BMI > 30           | 15-16 | 2.28E-04 | 1.97E-04 | 2.64E-04 |
| DTXSID2021446 | Xylene            | 1330-20-7  | Total              | 15-16 | 2.15E-03 | 2.08E-03 | 2.22E-03 |
| DTXSID2021446 | Xylene            | 1330-20-7  | Male               | 15-16 | 2.42E-03 | 2.25E-03 | 2.62E-03 |
| DTXSID2021446 | Xylene            | 1330-20-7  | Female             | 15-16 | 1.91E-03 | 1.77E-03 | 2.05E-03 |
| DTXSID2021446 | Xylene            | 1330-20-7  | 3 - 5 years        | 15-16 | 3.85E-03 | 3.52E-03 | 4.21E-03 |
| DTXSID2021446 | Xylene            | 1330-20-7  | 6 - 11 years       | 15-16 | 2.14E-03 | 1.91E-03 | 2.40E-03 |
| DTXSID2021446 | Xylene            | 1330-20-7  | 12 - 19 years      | 15-16 | 1.67E-03 | 1.55E-03 | 1.80E-03 |
| DTXSID2021446 | Xylene            | 1330-20-7  | 20 - 65 years      | 15-16 | 2.35E-03 | 2.17E-03 | 2.54E-03 |
| DTXSID2021446 | Xylene            | 1330-20-7  | 66 years and older | 15-16 | 1.50E-03 | 1.40E-03 | 1.62E-03 |
| DTXSID2021446 | Xylene            | 1330-20-7  | ReproAgeFemale     | 15-16 | 2.07E-03 | 1.93E-03 | 2.23E-03 |
| DTXSID2021446 | Xylene            | 1330-20-7  | BMI <= 30          | 15-16 | 2.28E-03 | 2.19E-03 | 2.37E-03 |
| DTXSID2021446 | Xylene            | 1330-20-7  | BMI > 30           | 15-16 | 1.90E-03 | 1.79E-03 | 2.01E-03 |
| DTXSID7074828 | Arsenous acid     | 13464-58-9 | Total              | 15-16 | 2.25E-06 | 2.11E-06 | 2.40E-06 |
| DTXSID7074828 | Arsenous acid     | 13464-58-9 | Male               | 15-16 | 3.04E-06 | 2.15E-06 | 4.26E-06 |
| DTXSID7074828 | Arsenous acid     | 13464-58-9 | Female             | 15-16 | 1.65E-06 | 1.10E-06 | 2.52E-06 |
| DTXSID7074828 | Arsenous acid     | 13464-58-9 | 3 - 5 years        | 15-16 | 5.79E-06 | 4.33E-06 | 7.73E-06 |
| DTXSID7074828 | Arsenous acid     | 13464-58-9 | 6 - 11 years       | 15-16 | 4.06E-06 | 3.09E-06 | 5.37E-06 |
| DTXSID7074828 | Arsenous acid     | 13464-58-9 | 12 - 19 years      | 15-16 | 3.73E-06 | 2.74E-06 | 5.09E-06 |
| DTXSID7074828 | Arsenous acid     | 13464-58-9 | 20 - 65 years      | 15-16 | 2.32E-06 | 1.57E-06 | 3.46E-06 |
| DTXSID7074828 | Arsenous acid     | 13464-58-9 | 66 years and older | 15-16 | 7.83E-07 | 3.32E-07 | 1.85E-06 |

|               |                       |            |                    |       |          |          |          |
|---------------|-----------------------|------------|--------------------|-------|----------|----------|----------|
| DTXSID7074828 | Arsenous acid         | 13464-58-9 | ReproAgeFemale     | 15-16 | 2.27E-06 | 1.98E-06 | 2.59E-06 |
| DTXSID7074828 | Arsenous acid         | 13464-58-9 | BMI <= 30          | 15-16 | 2.88E-06 | 2.68E-06 | 3.09E-06 |
| DTXSID7074828 | Arsenous acid         | 13464-58-9 | BMI > 30           | 15-16 | 1.43E-06 | 1.26E-06 | 1.62E-06 |
| DTXSID5024217 | Nitrate               | 14797-55-8 | Total              | 15-16 | 7.98E-01 | 7.79E-01 | 8.16E-01 |
| DTXSID5024217 | Nitrate               | 14797-55-8 | Male               | 15-16 | 8.62E-01 | 8.05E-01 | 9.21E-01 |
| DTXSID5024217 | Nitrate               | 14797-55-8 | Female             | 15-16 | 7.40E-01 | 7.02E-01 | 7.84E-01 |
| DTXSID5024217 | Nitrate               | 14797-55-8 | 3 - 5 years        | 15-16 | 2.52E+00 | 2.37E+00 | 2.68E+00 |
| DTXSID5024217 | Nitrate               | 14797-55-8 | 6 - 11 years       | 15-16 | 1.39E+00 | 1.30E+00 | 1.48E+00 |
| DTXSID5024217 | Nitrate               | 14797-55-8 | 12 - 19 years      | 15-16 | 8.21E-01 | 7.74E-01 | 8.71E-01 |
| DTXSID5024217 | Nitrate               | 14797-55-8 | 20 - 65 years      | 15-16 | 7.75E-01 | 7.34E-01 | 8.20E-01 |
| DTXSID5024217 | Nitrate               | 14797-55-8 | 66 years and older | 15-16 | 4.95E-01 | 4.25E-01 | 5.78E-01 |
| DTXSID5024217 | Nitrate               | 14797-55-8 | ReproAgeFemale     | 15-16 | 7.94E-01 | 7.58E-01 | 8.35E-01 |
| DTXSID5024217 | Nitrate               | 14797-55-8 | BMI <= 30          | 15-16 | 9.13E-01 | 8.87E-01 | 9.39E-01 |
| DTXSID5024217 | Nitrate               | 14797-55-8 | BMI > 30           | 15-16 | 6.05E-01 | 5.85E-01 | 6.28E-01 |
| DTXSID6024252 | Perchlorate           | 14797-73-0 | Total              | 15-16 | 4.61E-05 | 4.48E-05 | 4.75E-05 |
| DTXSID6024252 | Perchlorate           | 14797-73-0 | Male               | 15-16 | 5.03E-05 | 4.63E-05 | 5.45E-05 |
| DTXSID6024252 | Perchlorate           | 14797-73-0 | Female             | 15-16 | 4.24E-05 | 3.98E-05 | 4.53E-05 |
| DTXSID6024252 | Perchlorate           | 14797-73-0 | 3 - 5 years        | 15-16 | 1.94E-04 | 1.73E-04 | 2.18E-04 |
| DTXSID6024252 | Perchlorate           | 14797-73-0 | 6 - 11 years       | 15-16 | 9.48E-05 | 8.34E-05 | 1.08E-04 |
| DTXSID6024252 | Perchlorate           | 14797-73-0 | 12 - 19 years      | 15-16 | 4.44E-05 | 4.07E-05 | 4.85E-05 |
| DTXSID6024252 | Perchlorate           | 14797-73-0 | 20 - 65 years      | 15-16 | 4.20E-05 | 3.92E-05 | 4.50E-05 |
| DTXSID6024252 | Perchlorate           | 14797-73-0 | 66 years and older | 15-16 | 3.46E-05 | 3.11E-05 | 3.87E-05 |
| DTXSID6024252 | Perchlorate           | 14797-73-0 | ReproAgeFemale     | 15-16 | 4.19E-05 | 3.92E-05 | 4.47E-05 |
| DTXSID6024252 | Perchlorate           | 14797-73-0 | BMI <= 30          | 15-16 | 5.33E-05 | 5.15E-05 | 5.54E-05 |
| DTXSID6024252 | Perchlorate           | 14797-73-0 | BMI > 30           | 15-16 | 3.41E-05 | 3.27E-05 | 3.56E-05 |
| DTXSID7020970 | Nitrofen              | 1836-75-5  | Total              | 15-16 | 5.64E-07 | 3.41E-09 | 9.38E-06 |
| DTXSID7020970 | Nitrofen              | 1836-75-5  | Male               | 15-16 | 5.98E-07 | 4.39E-09 | 1.01E-05 |
| DTXSID7020970 | Nitrofen              | 1836-75-5  | Female             | 15-16 | 5.37E-07 | 3.67E-09 | 9.48E-06 |
| DTXSID7020970 | Nitrofen              | 1836-75-5  | 3 - 5 years        | 15-16 | 1.47E-06 | 1.02E-08 | 2.86E-05 |
| DTXSID7020970 | Nitrofen              | 1836-75-5  | 6 - 11 years       | 15-16 | 1.02E-06 | 7.08E-09 | 1.80E-05 |
| DTXSID7020970 | Nitrofen              | 1836-75-5  | 12 - 19 years      | 15-16 | 6.59E-07 | 4.55E-09 | 1.13E-05 |
| DTXSID7020970 | Nitrofen              | 1836-75-5  | 20 - 65 years      | 15-16 | 5.41E-07 | 4.15E-09 | 8.76E-06 |
| DTXSID7020970 | Nitrofen              | 1836-75-5  | 66 years and older | 15-16 | 5.70E-07 | 5.32E-09 | 7.80E-06 |
| DTXSID7020970 | Nitrofen              | 1836-75-5  | ReproAgeFemale     | 15-16 | 5.79E-07 | 4.74E-09 | 9.32E-06 |
| DTXSID7020970 | Nitrofen              | 1836-75-5  | BMI <= 30          | 15-16 | 6.19E-07 | 3.41E-09 | 1.02E-05 |
| DTXSID7020970 | Nitrofen              | 1836-75-5  | BMI > 30           | 15-16 | 5.48E-07 | 4.45E-09 | 8.35E-06 |
| DTXSID4025082 | Di-isodecyl phthalate | 26761-40-0 | Total              | 15-16 | 3.79E-05 | 3.68E-05 | 3.92E-05 |
| DTXSID4025082 | Di-isodecyl phthalate | 26761-40-0 | Male               | 15-16 | 4.17E-05 | 3.72E-05 | 4.66E-05 |
| DTXSID4025082 | Di-isodecyl phthalate | 26761-40-0 | Female             | 15-16 | 3.47E-05 | 3.14E-05 | 3.82E-05 |
| DTXSID4025082 | Di-isodecyl phthalate | 26761-40-0 | 3 - 5 years        | 15-16 | 1.47E-04 | 1.36E-04 | 1.59E-04 |
| DTXSID4025082 | Di-isodecyl phthalate | 26761-40-0 | 6 - 11 years       | 15-16 | 7.31E-05 | 6.74E-05 | 7.93E-05 |
| DTXSID4025082 | Di-isodecyl phthalate | 26761-40-0 | 12 - 19 years      | 15-16 | 3.90E-05 | 3.56E-05 | 4.25E-05 |
| DTXSID4025082 | Di-isodecyl phthalate | 26761-40-0 | 20 - 65 years      | 15-16 | 3.51E-05 | 3.18E-05 | 3.87E-05 |
| DTXSID4025082 | Di-isodecyl phthalate | 26761-40-0 | 66 years and older | 15-16 | 2.70E-05 | 2.35E-05 | 3.11E-05 |
| DTXSID4025082 | Di-isodecyl phthalate | 26761-40-0 | ReproAgeFemale     | 15-16 | 3.40E-05 | 3.17E-05 | 3.65E-05 |
| DTXSID4025082 | Di-isodecyl phthalate | 26761-40-0 | BMI <= 30          | 15-16 | 4.08E-05 | 3.92E-05 | 4.24E-05 |
| DTXSID4025082 | Di-isodecyl phthalate | 26761-40-0 | BMI > 30           | 15-16 | 3.27E-05 | 3.10E-05 | 3.45E-05 |

|               |                       |            |                    |       |          |          |          |
|---------------|-----------------------|------------|--------------------|-------|----------|----------|----------|
| DTXSID4022521 | Di-isononyl phthalate | 28553-12-0 | Total              | 15-16 | 1.39E-04 | 1.34E-04 | 1.45E-04 |
| DTXSID4022521 | Di-isononyl phthalate | 28553-12-0 | Male               | 15-16 | 1.51E-04 | 1.21E-04 | 1.89E-04 |
| DTXSID4022521 | Di-isononyl phthalate | 28553-12-0 | Female             | 15-16 | 1.27E-04 | 1.06E-04 | 1.53E-04 |
| DTXSID4022521 | Di-isononyl phthalate | 28553-12-0 | 3 - 5 years        | 15-16 | 4.93E-04 | 4.24E-04 | 5.71E-04 |
| DTXSID4022521 | Di-isononyl phthalate | 28553-12-0 | 6 - 11 years       | 15-16 | 2.76E-04 | 2.39E-04 | 3.20E-04 |
| DTXSID4022521 | Di-isononyl phthalate | 28553-12-0 | 12 - 19 years      | 15-16 | 1.42E-04 | 1.14E-04 | 1.79E-04 |
| DTXSID4022521 | Di-isononyl phthalate | 28553-12-0 | 20 - 65 years      | 15-16 | 1.32E-04 | 1.05E-04 | 1.67E-04 |
| DTXSID4022521 | Di-isononyl phthalate | 28553-12-0 | 66 years and older | 15-16 | 8.91E-05 | 7.73E-05 | 1.02E-04 |
| DTXSID4022521 | Di-isononyl phthalate | 28553-12-0 | ReproAgeFemale     | 15-16 | 1.31E-04 | 1.19E-04 | 1.44E-04 |
| DTXSID4022521 | Di-isononyl phthalate | 28553-12-0 | BMI <= 30          | 15-16 | 1.46E-04 | 1.39E-04 | 1.53E-04 |
| DTXSID4022521 | Di-isononyl phthalate | 28553-12-0 | BMI > 30           | 15-16 | 1.27E-04 | 1.18E-04 | 1.36E-04 |
| DTXSID8047763 | Thiocyanate           | 302-04-5   | Total              | 15-16 | 2.02E-03 | 4.23E-08 | 1.86E-02 |
| DTXSID8047763 | Thiocyanate           | 302-04-5   | Male               | 15-16 | 1.87E-03 | 1.06E-07 | 2.22E-02 |
| DTXSID8047763 | Thiocyanate           | 302-04-5   | Female             | 15-16 | 1.79E-04 | 1.84E-08 | 1.64E-02 |
| DTXSID8047763 | Thiocyanate           | 302-04-5   | 3 - 5 years        | 15-16 | 4.90E-05 | 1.26E-08 | 3.33E-02 |
| DTXSID8047763 | Thiocyanate           | 302-04-5   | 6 - 11 years       | 15-16 | 6.16E-05 | 8.72E-09 | 2.27E-02 |
| DTXSID8047763 | Thiocyanate           | 302-04-5   | 12 - 19 years      | 15-16 | 1.51E-04 | 1.04E-08 | 1.72E-02 |
| DTXSID8047763 | Thiocyanate           | 302-04-5   | 20 - 65 years      | 15-16 | 3.20E-04 | 1.56E-08 | 2.09E-02 |
| DTXSID8047763 | Thiocyanate           | 302-04-5   | 66 years and older | 15-16 | 1.68E-04 | 1.53E-08 | 1.12E-02 |
| DTXSID8047763 | Thiocyanate           | 302-04-5   | ReproAgeFemale     | 15-16 | 3.13E-04 | 1.45E-08 | 1.97E-02 |
| DTXSID8047763 | Thiocyanate           | 302-04-5   | BMI <= 30          | 15-16 | 2.32E-04 | 1.42E-08 | 1.98E-02 |
| DTXSID8047763 | Thiocyanate           | 302-04-5   | BMI > 30           | 15-16 | 4.22E-04 | 1.23E-08 | 1.66E-02 |
| DTXSID6058055 | Chlomethoxyfen        | 32861-85-1 | Total              | 15-16 | 6.21E-07 | 4.57E-09 | 1.05E-05 |
| DTXSID6058055 | Chlomethoxyfen        | 32861-85-1 | Male               | 15-16 | 6.56E-07 | 4.75E-09 | 1.06E-05 |
| DTXSID6058055 | Chlomethoxyfen        | 32861-85-1 | Female             | 15-16 | 6.55E-07 | 5.70E-09 | 1.06E-05 |
| DTXSID6058055 | Chlomethoxyfen        | 32861-85-1 | 3 - 5 years        | 15-16 | 1.71E-06 | 1.05E-08 | 3.19E-05 |
| DTXSID6058055 | Chlomethoxyfen        | 32861-85-1 | 6 - 11 years       | 15-16 | 1.13E-06 | 8.23E-09 | 1.98E-05 |
| DTXSID6058055 | Chlomethoxyfen        | 32861-85-1 | 12 - 19 years      | 15-16 | 7.51E-07 | 5.06E-09 | 1.31E-05 |
| DTXSID6058055 | Chlomethoxyfen        | 32861-85-1 | 20 - 65 years      | 15-16 | 5.76E-07 | 3.58E-09 | 9.86E-06 |
| DTXSID6058055 | Chlomethoxyfen        | 32861-85-1 | 66 years and older | 15-16 | 5.34E-07 | 3.83E-09 | 8.91E-06 |
| DTXSID6058055 | Chlomethoxyfen        | 32861-85-1 | ReproAgeFemale     | 15-16 | 6.56E-07 | 4.45E-09 | 1.12E-05 |
| DTXSID6058055 | Chlomethoxyfen        | 32861-85-1 | BMI <= 30          | 15-16 | 6.67E-07 | 5.70E-09 | 1.10E-05 |
| DTXSID6058055 | Chlomethoxyfen        | 32861-85-1 | BMI > 30           | 15-16 | 6.11E-07 | 5.36E-09 | 9.18E-06 |
| DTXSID5032498 | Triclosan             | 3380-34-5  | Total              | 15-16 | 5.82E-05 | 5.29E-05 | 6.41E-05 |
| DTXSID5032498 | Triclosan             | 3380-34-5  | Male               | 15-16 | 5.77E-05 | 4.73E-05 | 7.02E-05 |
| DTXSID5032498 | Triclosan             | 3380-34-5  | Female             | 15-16 | 5.86E-05 | 4.77E-05 | 7.25E-05 |
| DTXSID5032498 | Triclosan             | 3380-34-5  | 3 - 5 years        | 15-16 | 1.07E-04 | 7.91E-05 | 1.51E-04 |
| DTXSID5032498 | Triclosan             | 3380-34-5  | 6 - 11 years       | 15-16 | 7.70E-05 | 5.59E-05 | 1.08E-04 |
| DTXSID5032498 | Triclosan             | 3380-34-5  | 12 - 19 years      | 15-16 | 4.34E-05 | 3.19E-05 | 5.98E-05 |
| DTXSID5032498 | Triclosan             | 3380-34-5  | 20 - 65 years      | 15-16 | 5.94E-05 | 5.12E-05 | 6.85E-05 |
| DTXSID5032498 | Triclosan             | 3380-34-5  | 66 years and older | 15-16 | 5.62E-05 | 3.29E-05 | 9.64E-05 |
| DTXSID5032498 | Triclosan             | 3380-34-5  | ReproAgeFemale     | 15-16 | 6.06E-05 | 4.93E-05 | 7.46E-05 |
| DTXSID5032498 | Triclosan             | 3380-34-5  | BMI <= 30          | 15-16 | 6.46E-05 | 5.75E-05 | 7.26E-05 |
| DTXSID5032498 | Triclosan             | 3380-34-5  | BMI > 30           | 15-16 | 4.76E-05 | 4.02E-05 | 5.65E-05 |
| DTXSID8042349 | Prothiofos            | 34643-46-4 | Total              | 15-16 | 7.23E-07 | 5.18E-09 | 1.13E-05 |
| DTXSID8042349 | Prothiofos            | 34643-46-4 | Male               | 15-16 | 7.32E-07 | 6.13E-09 | 1.16E-05 |
| DTXSID8042349 | Prothiofos            | 34643-46-4 | Female             | 15-16 | 7.41E-07 | 5.09E-09 | 1.21E-05 |

|                |               |            |                    |       |          |          |          |
|----------------|---------------|------------|--------------------|-------|----------|----------|----------|
| DTXSID8042349  | Prothiofos    | 34643-46-4 | 3 - 5 years        | 15-16 | 1.82E-06 | 1.28E-08 | 3.55E-05 |
| DTXSID8042349  | Prothiofos    | 34643-46-4 | 6 - 11 years       | 15-16 | 1.23E-06 | 1.00E-08 | 2.26E-05 |
| DTXSID8042349  | Prothiofos    | 34643-46-4 | 12 - 19 years      | 15-16 | 8.73E-07 | 6.28E-09 | 1.40E-05 |
| DTXSID8042349  | Prothiofos    | 34643-46-4 | 20 - 65 years      | 15-16 | 6.81E-07 | 6.24E-09 | 1.10E-05 |
| DTXSID8042349  | Prothiofos    | 34643-46-4 | 66 years and older | 15-16 | 5.89E-07 | 4.77E-09 | 9.00E-06 |
| DTXSID8042349  | Prothiofos    | 34643-46-4 | ReproAgeFemale     | 15-16 | 7.03E-07 | 5.56E-09 | 1.20E-05 |
| DTXSID8042349  | Prothiofos    | 34643-46-4 | BMI <= 30          | 15-16 | 7.05E-07 | 4.90E-09 | 1.20E-05 |
| DTXSID8042349  | Prothiofos    | 34643-46-4 | BMI > 30           | 15-16 | 5.96E-07 | 4.86E-09 | 9.63E-06 |
| DTXSID0058069  | Phosdiphen    | 36519-00-3 | Total              | 15-16 | 7.94E-07 | 4.87E-09 | 1.40E-05 |
| DTXSID0058069  | Phosdiphen    | 36519-00-3 | Male               | 15-16 | 8.26E-07 | 7.59E-09 | 1.46E-05 |
| DTXSID0058069  | Phosdiphen    | 36519-00-3 | Female             | 15-16 | 7.91E-07 | 7.45E-09 | 1.34E-05 |
| DTXSID0058069  | Phosdiphen    | 36519-00-3 | 3 - 5 years        | 15-16 | 2.18E-06 | 1.55E-08 | 4.11E-05 |
| DTXSID0058069  | Phosdiphen    | 36519-00-3 | 6 - 11 years       | 15-16 | 1.41E-06 | 8.92E-09 | 2.55E-05 |
| DTXSID0058069  | Phosdiphen    | 36519-00-3 | 12 - 19 years      | 15-16 | 9.88E-07 | 8.28E-09 | 1.79E-05 |
| DTXSID0058069  | Phosdiphen    | 36519-00-3 | 20 - 65 years      | 15-16 | 7.74E-07 | 5.57E-09 | 1.29E-05 |
| DTXSID0058069  | Phosdiphen    | 36519-00-3 | 66 years and older | 15-16 | 7.12E-07 | 4.59E-09 | 1.13E-05 |
| DTXSID0058069  | Phosdiphen    | 36519-00-3 | ReproAgeFemale     | 15-16 | 8.77E-07 | 5.18E-09 | 1.44E-05 |
| DTXSID0058069  | Phosdiphen    | 36519-00-3 | BMI <= 30          | 15-16 | 9.21E-07 | 6.54E-09 | 1.48E-05 |
| DTXSID0058069  | Phosdiphen    | 36519-00-3 | BMI > 30           | 15-16 | 7.81E-07 | 7.82E-09 | 1.16E-05 |
| DTXSID80873153 | Arsenocholine | 39895-81-3 | Total              | 15-16 | 6.85E-07 | 2.18E-07 | 1.35E-06 |
| DTXSID80873153 | Arsenocholine | 39895-81-3 | Male               | 15-16 | 7.81E-07 | 2.82E-07 | 1.40E-06 |
| DTXSID80873153 | Arsenocholine | 39895-81-3 | Female             | 15-16 | 6.42E-07 | 1.81E-07 | 1.33E-06 |
| DTXSID80873153 | Arsenocholine | 39895-81-3 | 3 - 5 years        | 15-16 | 7.54E-07 | 2.18E-07 | 1.36E-06 |
| DTXSID80873153 | Arsenocholine | 39895-81-3 | 6 - 11 years       | 15-16 | 7.54E-07 | 2.36E-07 | 1.43E-06 |
| DTXSID80873153 | Arsenocholine | 39895-81-3 | 12 - 19 years      | 15-16 | 7.62E-07 | 2.10E-07 | 1.51E-06 |
| DTXSID80873153 | Arsenocholine | 39895-81-3 | 20 - 65 years      | 15-16 | 7.53E-07 | 2.43E-07 | 1.47E-06 |
| DTXSID80873153 | Arsenocholine | 39895-81-3 | 66 years and older | 15-16 | 8.33E-07 | 2.78E-07 | 1.51E-06 |
| DTXSID80873153 | Arsenocholine | 39895-81-3 | ReproAgeFemale     | 15-16 | 6.86E-07 | 2.02E-07 | 1.41E-06 |
| DTXSID80873153 | Arsenocholine | 39895-81-3 | BMI <= 30          | 15-16 | 6.55E-07 | 2.04E-07 | 1.29E-06 |
| DTXSID80873153 | Arsenocholine | 39895-81-3 | BMI > 30           | 15-16 | 8.25E-07 | 2.88E-07 | 1.56E-06 |
| DTXSID1040320  | Bifenox       | 42576-02-3 | Total              | 15-16 | 7.23E-07 | 5.56E-09 | 1.15E-05 |
| DTXSID1040320  | Bifenox       | 42576-02-3 | Male               | 15-16 | 7.01E-07 | 4.58E-09 | 1.14E-05 |
| DTXSID1040320  | Bifenox       | 42576-02-3 | Female             | 15-16 | 7.18E-07 | 6.47E-09 | 1.18E-05 |
| DTXSID1040320  | Bifenox       | 42576-02-3 | 3 - 5 years        | 15-16 | 1.97E-06 | 1.24E-08 | 3.37E-05 |
| DTXSID1040320  | Bifenox       | 42576-02-3 | 6 - 11 years       | 15-16 | 1.18E-06 | 7.45E-09 | 2.12E-05 |
| DTXSID1040320  | Bifenox       | 42576-02-3 | 12 - 19 years      | 15-16 | 8.04E-07 | 6.17E-09 | 1.41E-05 |
| DTXSID1040320  | Bifenox       | 42576-02-3 | 20 - 65 years      | 15-16 | 7.24E-07 | 7.30E-09 | 1.06E-05 |
| DTXSID1040320  | Bifenox       | 42576-02-3 | 66 years and older | 15-16 | 6.03E-07 | 5.39E-09 | 9.09E-06 |
| DTXSID1040320  | Bifenox       | 42576-02-3 | ReproAgeFemale     | 15-16 | 6.80E-07 | 4.41E-09 | 1.17E-05 |
| DTXSID1040320  | Bifenox       | 42576-02-3 | BMI <= 30          | 15-16 | 7.21E-07 | 5.00E-09 | 1.22E-05 |
| DTXSID1040320  | Bifenox       | 42576-02-3 | BMI > 30           | 15-16 | 5.98E-07 | 5.35E-09 | 9.52E-06 |
| DTXSID8058118  | Naproanilide  | 52570-16-8 | Total              | 15-16 | 1.75E-01 | 1.69E-01 | 1.81E-01 |
| DTXSID8058118  | Naproanilide  | 52570-16-8 | Male               | 15-16 | 1.80E-01 | 1.62E-01 | 2.01E-01 |
| DTXSID8058118  | Naproanilide  | 52570-16-8 | Female             | 15-16 | 1.69E-01 | 1.53E-01 | 1.87E-01 |
| DTXSID8058118  | Naproanilide  | 52570-16-8 | 3 - 5 years        | 15-16 | 3.45E-01 | 3.09E-01 | 4.20E-01 |
| DTXSID8058118  | Naproanilide  | 52570-16-8 | 6 - 11 years       | 15-16 | 2.09E-01 | 1.79E-01 | 2.44E-01 |
| DTXSID8058118  | Naproanilide  | 52570-16-8 | 12 - 19 years      | 15-16 | 1.69E-01 | 1.48E-01 | 1.93E-01 |

|               |                     |            |                    |       |          |          |          |
|---------------|---------------------|------------|--------------------|-------|----------|----------|----------|
| DTXSID8058118 | Naproanilide        | 52570-16-8 | 20 - 65 years      | 15-16 | 1.88E-01 | 1.74E-01 | 2.02E-01 |
| DTXSID8058118 | Naproanilide        | 52570-16-8 | 66 years and older | 15-16 | 9.38E-02 | 7.44E-02 | 1.18E-01 |
| DTXSID8058118 | Naproanilide        | 52570-16-8 | ReproAgeFemale     | 15-16 | 2.12E-01 | 1.98E-01 | 2.27E-01 |
| DTXSID8058118 | Naproanilide        | 52570-16-8 | BMI <= 30          | 15-16 | 1.80E-01 | 1.73E-01 | 1.88E-01 |
| DTXSID8058118 | Naproanilide        | 52570-16-8 | BMI > 30           | 15-16 | 1.64E-01 | 1.55E-01 | 1.74E-01 |
| DTXSID6022056 | 1,3-dichlorobenzene | 541-73-1   | Total              | 15-16 | 2.84E-07 | 1.90E-09 | 4.86E-06 |
| DTXSID6022056 | 1,3-dichlorobenzene | 541-73-1   | Male               | 15-16 | 3.13E-07 | 2.23E-09 | 4.92E-06 |
| DTXSID6022056 | 1,3-dichlorobenzene | 541-73-1   | Female             | 15-16 | 3.01E-07 | 2.27E-09 | 4.95E-06 |
| DTXSID6022056 | 1,3-dichlorobenzene | 541-73-1   | 3 - 5 years        | 15-16 | 8.03E-07 | 5.06E-09 | 1.44E-05 |
| DTXSID6022056 | 1,3-dichlorobenzene | 541-73-1   | 6 - 11 years       | 15-16 | 5.22E-07 | 4.10E-09 | 9.13E-06 |
| DTXSID6022056 | 1,3-dichlorobenzene | 541-73-1   | 12 - 19 years      | 15-16 | 3.36E-07 | 1.92E-09 | 5.95E-06 |
| DTXSID6022056 | 1,3-dichlorobenzene | 541-73-1   | 20 - 65 years      | 15-16 | 2.84E-07 | 1.95E-09 | 4.57E-06 |
| DTXSID6022056 | 1,3-dichlorobenzene | 541-73-1   | 66 years and older | 15-16 | 2.59E-07 | 2.33E-09 | 4.01E-06 |
| DTXSID6022056 | 1,3-dichlorobenzene | 541-73-1   | ReproAgeFemale     | 15-16 | 3.09E-07 | 2.14E-09 | 5.11E-06 |
| DTXSID6022056 | 1,3-dichlorobenzene | 541-73-1   | BMI <= 30          | 15-16 | 2.86E-07 | 1.74E-09 | 5.24E-06 |
| DTXSID6022056 | 1,3-dichlorobenzene | 541-73-1   | BMI > 30           | 15-16 | 2.40E-07 | 1.54E-09 | 3.99E-06 |
| DTXSID6023991 | Cyanide             | 57-12-5    | Total              | 15-16 | 1.35E-03 | 3.99E-04 | 8.74E-03 |
| DTXSID6023991 | Cyanide             | 57-12-5    | Male               | 15-16 | 1.51E-03 | 3.22E-04 | 1.02E-02 |
| DTXSID6023991 | Cyanide             | 57-12-5    | Female             | 15-16 | 3.01E-03 | 4.87E-04 | 8.02E-03 |
| DTXSID6023991 | Cyanide             | 57-12-5    | 3 - 5 years        | 15-16 | 1.43E-02 | 3.18E-03 | 1.96E-02 |
| DTXSID6023991 | Cyanide             | 57-12-5    | 6 - 11 years       | 15-16 | 7.96E-03 | 1.56E-03 | 1.25E-02 |
| DTXSID6023991 | Cyanide             | 57-12-5    | 12 - 19 years      | 15-16 | 2.94E-03 | 3.95E-04 | 8.34E-03 |
| DTXSID6023991 | Cyanide             | 57-12-5    | 20 - 65 years      | 15-16 | 2.64E-03 | 3.57E-04 | 9.94E-03 |
| DTXSID6023991 | Cyanide             | 57-12-5    | 66 years and older | 15-16 | 1.53E-03 | 2.29E-04 | 5.35E-03 |
| DTXSID6023991 | Cyanide             | 57-12-5    | ReproAgeFemale     | 15-16 | 3.14E-03 | 5.08E-04 | 9.51E-03 |
| DTXSID6023991 | Cyanide             | 57-12-5    | BMI <= 30          | 15-16 | 3.19E-03 | 4.71E-04 | 9.48E-03 |
| DTXSID6023991 | Cyanide             | 57-12-5    | BMI > 30           | 15-16 | 1.71E-03 | 2.93E-04 | 7.76E-03 |
| DTXSID9022445 | Bisphenol F         | 620-92-8   | Total              | 15-16 | 2.45E-06 | 2.19E-06 | 2.75E-06 |
| DTXSID9022445 | Bisphenol F         | 620-92-8   | Male               | 15-16 | 2.71E-06 | 1.72E-06 | 4.32E-06 |
| DTXSID9022445 | Bisphenol F         | 620-92-8   | Female             | 15-16 | 2.28E-06 | 1.67E-06 | 3.14E-06 |
| DTXSID9022445 | Bisphenol F         | 620-92-8   | 3 - 5 years        | 15-16 | 2.48E-06 | 1.37E-06 | 3.37E-06 |
| DTXSID9022445 | Bisphenol F         | 620-92-8   | 6 - 11 years       | 15-16 | 2.60E-06 | 1.51E-06 | 4.33E-06 |
| DTXSID9022445 | Bisphenol F         | 620-92-8   | 12 - 19 years      | 15-16 | 2.68E-06 | 1.07E-06 | 7.21E-06 |
| DTXSID9022445 | Bisphenol F         | 620-92-8   | 20 - 65 years      | 15-16 | 2.80E-06 | 2.11E-06 | 3.74E-06 |
| DTXSID9022445 | Bisphenol F         | 620-92-8   | 66 years and older | 15-16 | 1.62E-06 | 9.48E-07 | 2.75E-06 |
| DTXSID9022445 | Bisphenol F         | 620-92-8   | ReproAgeFemale     | 15-16 | 2.69E-06 | 2.16E-06 | 3.36E-06 |
| DTXSID9022445 | Bisphenol F         | 620-92-8   | BMI <= 30          | 15-16 | 2.44E-06 | 2.13E-06 | 2.79E-06 |
| DTXSID9022445 | Bisphenol F         | 620-92-8   | BMI > 30           | 15-16 | 2.50E-06 | 2.06E-06 | 3.03E-06 |
| DTXSID9020247 | Carbaryl            | 63-25-2    | Total              | 15-16 | 8.21E-06 | 2.64E-08 | 3.88E-05 |
| DTXSID9020247 | Carbaryl            | 63-25-2    | Male               | 15-16 | 8.52E-06 | 2.48E-08 | 4.43E-05 |
| DTXSID9020247 | Carbaryl            | 63-25-2    | Female             | 15-16 | 7.92E-06 | 2.68E-08 | 3.75E-05 |
| DTXSID9020247 | Carbaryl            | 63-25-2    | 3 - 5 years        | 15-16 | 1.32E-05 | 4.60E-08 | 6.31E-05 |
| DTXSID9020247 | Carbaryl            | 63-25-2    | 6 - 11 years       | 15-16 | 7.35E-06 | 2.49E-08 | 3.74E-05 |
| DTXSID9020247 | Carbaryl            | 63-25-2    | 12 - 19 years      | 15-16 | 5.04E-06 | 2.09E-08 | 2.23E-05 |
| DTXSID9020247 | Carbaryl            | 63-25-2    | 20 - 65 years      | 15-16 | 8.54E-06 | 3.20E-08 | 4.48E-05 |
| DTXSID9020247 | Carbaryl            | 63-25-2    | 66 years and older | 15-16 | 8.23E-06 | 3.00E-08 | 4.58E-05 |
| DTXSID9020247 | Carbaryl            | 63-25-2    | ReproAgeFemale     | 15-16 | 7.82E-06 | 2.54E-08 | 3.62E-05 |

|               |                       |            |                    |       |          |          |          |
|---------------|-----------------------|------------|--------------------|-------|----------|----------|----------|
| DTXSID9020247 | Carbaryl              | 63-25-2    | BMI <= 30          | 15-16 | 8.89E-06 | 3.30E-08 | 4.09E-05 |
| DTXSID9020247 | Carbaryl              | 63-25-2    | BMI > 30           | 15-16 | 7.41E-06 | 2.01E-08 | 3.65E-05 |
| DTXSID0052833 | Arsenobetaine         | 64436-13-1 | Total              | 15-16 | 1.18E-05 | 1.06E-05 | 1.32E-05 |
| DTXSID0052833 | Arsenobetaine         | 64436-13-1 | Male               | 15-16 | 1.42E-05 | 1.04E-05 | 1.94E-05 |
| DTXSID0052833 | Arsenobetaine         | 64436-13-1 | Female             | 15-16 | 9.80E-06 | 6.19E-06 | 1.59E-05 |
| DTXSID0052833 | Arsenobetaine         | 64436-13-1 | 3 - 5 years        | 15-16 | 1.13E-05 | 4.61E-06 | 1.81E-05 |
| DTXSID0052833 | Arsenobetaine         | 64436-13-1 | 6 - 11 years       | 15-16 | 1.33E-05 | 6.50E-06 | 2.03E-05 |
| DTXSID0052833 | Arsenobetaine         | 64436-13-1 | 12 - 19 years      | 15-16 | 5.12E-06 | 2.11E-06 | 1.26E-05 |
| DTXSID0052833 | Arsenobetaine         | 64436-13-1 | 20 - 65 years      | 15-16 | 1.34E-05 | 1.02E-05 | 1.78E-05 |
| DTXSID0052833 | Arsenobetaine         | 64436-13-1 | 66 years and older | 15-16 | 1.76E-05 | 1.16E-05 | 2.65E-05 |
| DTXSID0052833 | Arsenobetaine         | 64436-13-1 | ReproAgeFemale     | 15-16 | 8.05E-06 | 5.96E-06 | 1.10E-05 |
| DTXSID0052833 | Arsenobetaine         | 64436-13-1 | BMI <= 30          | 15-16 | 1.32E-05 | 1.15E-05 | 1.51E-05 |
| DTXSID0052833 | Arsenobetaine         | 64436-13-1 | BMI > 30           | 15-16 | 9.72E-06 | 8.10E-06 | 1.17E-05 |
| DTXSID6020515 | N,N-Dimethylformamide | 68-12-2    | Total              | 15-16 | 6.84E-04 | 6.65E-04 | 7.05E-04 |
| DTXSID6020515 | N,N-Dimethylformamide | 68-12-2    | Male               | 15-16 | 7.50E-04 | 7.10E-04 | 7.95E-04 |
| DTXSID6020515 | N,N-Dimethylformamide | 68-12-2    | Female             | 15-16 | 6.28E-04 | 5.91E-04 | 6.66E-04 |
| DTXSID6020515 | N,N-Dimethylformamide | 68-12-2    | 3 - 5 years        | 15-16 | 6.81E-04 | 6.49E-04 | 7.15E-04 |
| DTXSID6020515 | N,N-Dimethylformamide | 68-12-2    | 6 - 11 years       | 15-16 | 4.46E-04 | 4.15E-04 | 4.82E-04 |
| DTXSID6020515 | N,N-Dimethylformamide | 68-12-2    | 12 - 19 years      | 15-16 | 3.59E-04 | 3.39E-04 | 3.81E-04 |
| DTXSID6020515 | N,N-Dimethylformamide | 68-12-2    | 20 - 65 years      | 15-16 | 8.06E-04 | 7.59E-04 | 8.60E-04 |
| DTXSID6020515 | N,N-Dimethylformamide | 68-12-2    | 66 years and older | 15-16 | 6.78E-04 | 6.08E-04 | 7.61E-04 |
| DTXSID6020515 | N,N-Dimethylformamide | 68-12-2    | ReproAgeFemale     | 15-16 | 6.75E-04 | 6.31E-04 | 7.22E-04 |
| DTXSID6020515 | N,N-Dimethylformamide | 68-12-2    | BMI <= 30          | 15-16 | 6.99E-04 | 6.75E-04 | 7.25E-04 |
| DTXSID6020515 | N,N-Dimethylformamide | 68-12-2    | BMI > 30           | 15-16 | 6.55E-04 | 6.24E-04 | 6.89E-04 |
| DTXSID3039242 | Benzene               | 71-43-2    | Total              | 15-16 | 2.91E-06 | 2.78E-06 | 3.04E-06 |
| DTXSID3039242 | Benzene               | 71-43-2    | Male               | 15-16 | 3.30E-06 | 2.99E-06 | 3.63E-06 |
| DTXSID3039242 | Benzene               | 71-43-2    | Female             | 15-16 | 2.55E-06 | 2.29E-06 | 2.85E-06 |
| DTXSID3039242 | Benzene               | 71-43-2    | 3 - 5 years        | 15-16 | 8.33E-06 | 7.33E-06 | 9.51E-06 |
| DTXSID3039242 | Benzene               | 71-43-2    | 6 - 11 years       | 15-16 | 5.13E-06 | 4.54E-06 | 5.80E-06 |
| DTXSID3039242 | Benzene               | 71-43-2    | 12 - 19 years      | 15-16 | 3.41E-06 | 2.92E-06 | 3.98E-06 |
| DTXSID3039242 | Benzene               | 71-43-2    | 20 - 65 years      | 15-16 | 2.84E-06 | 2.59E-06 | 3.12E-06 |
| DTXSID3039242 | Benzene               | 71-43-2    | 66 years and older | 15-16 | 2.13E-06 | 1.85E-06 | 2.46E-06 |
| DTXSID3039242 | Benzene               | 71-43-2    | ReproAgeFemale     | 15-16 | 2.92E-06 | 2.64E-06 | 3.22E-06 |
| DTXSID3039242 | Benzene               | 71-43-2    | BMI <= 30          | 15-16 | 3.34E-06 | 3.17E-06 | 3.52E-06 |
| DTXSID3039242 | Benzene               | 71-43-2    | BMI > 30           | 15-16 | 2.34E-06 | 2.18E-06 | 2.50E-06 |
| DTXSID2024161 | Lead                  | 7439-92-1  | Total              | 15-16 | 5.06E-06 | 4.93E-06 | 5.19E-06 |
| DTXSID2024161 | Lead                  | 7439-92-1  | Male               | 15-16 | 5.52E-06 | 5.03E-06 | 6.10E-06 |
| DTXSID2024161 | Lead                  | 7439-92-1  | Female             | 15-16 | 4.65E-06 | 4.31E-06 | 5.04E-06 |
| DTXSID2024161 | Lead                  | 7439-92-1  | 3 - 5 years        | 15-16 | 1.33E-05 | 1.21E-05 | 1.47E-05 |
| DTXSID2024161 | Lead                  | 7439-92-1  | 6 - 11 years       | 15-16 | 6.94E-06 | 6.29E-06 | 7.66E-06 |
| DTXSID2024161 | Lead                  | 7439-92-1  | 12 - 19 years      | 15-16 | 3.16E-06 | 2.88E-06 | 3.49E-06 |
| DTXSID2024161 | Lead                  | 7439-92-1  | 20 - 65 years      | 15-16 | 4.88E-06 | 4.44E-06 | 5.36E-06 |
| DTXSID2024161 | Lead                  | 7439-92-1  | 66 years and older | 15-16 | 5.72E-06 | 5.16E-06 | 6.34E-06 |
| DTXSID2024161 | Lead                  | 7439-92-1  | ReproAgeFemale     | 15-16 | 3.94E-06 | 3.72E-06 | 4.18E-06 |
| DTXSID2024161 | Lead                  | 7439-92-1  | BMI <= 30          | 15-16 | 5.80E-06 | 5.62E-06 | 6.00E-06 |
| DTXSID2024161 | Lead                  | 7439-92-1  | BMI > 30           | 15-16 | 3.81E-06 | 3.66E-06 | 3.98E-06 |
| DTXSID2024169 | Manganese             | 7439-96-5  | Total              | 15-16 | 8.87E-07 | 8.27E-07 | 9.56E-07 |

|               |            |           |                    |       |          |          |          |
|---------------|------------|-----------|--------------------|-------|----------|----------|----------|
| DTXSID2024169 | Manganese  | 7439-96-5 | Male               | 15-16 | 7.24E-07 | 6.36E-07 | 8.26E-07 |
| DTXSID2024169 | Manganese  | 7439-96-5 | Female             | 15-16 | 1.05E-06 | 9.17E-07 | 1.22E-06 |
| DTXSID2024169 | Manganese  | 7439-96-5 | 3 - 5 years        | 15-16 | 3.30E-06 | 2.79E-06 | 3.93E-06 |
| DTXSID2024169 | Manganese  | 7439-96-5 | 6 - 11 years       | 15-16 | 1.79E-06 | 1.44E-06 | 2.23E-06 |
| DTXSID2024169 | Manganese  | 7439-96-5 | 12 - 19 years      | 15-16 | 1.07E-06 | 8.59E-07 | 1.35E-06 |
| DTXSID2024169 | Manganese  | 7439-96-5 | 20 - 65 years      | 15-16 | 8.40E-07 | 7.53E-07 | 9.40E-07 |
| DTXSID2024169 | Manganese  | 7439-96-5 | 66 years and older | 15-16 | 7.37E-07 | 6.45E-07 | 8.41E-07 |
| DTXSID2024169 | Manganese  | 7439-96-5 | ReproAgeFemale     | 15-16 | 9.70E-07 | 8.27E-07 | 1.13E-06 |
| DTXSID2024169 | Manganese  | 7439-96-5 | BMI <= 30          | 15-16 | 1.08E-06 | 9.99E-07 | 1.17E-06 |
| DTXSID2024169 | Manganese  | 7439-96-5 | BMI > 30           | 15-16 | 6.39E-07 | 5.51E-07 | 7.39E-07 |
| DTXSID1024172 | Mercury    | 7439-97-6 | Total              | 15-16 | 1.86E-06 | 1.75E-06 | 1.97E-06 |
| DTXSID1024172 | Mercury    | 7439-97-6 | Male               | 15-16 | 1.87E-06 | 1.70E-06 | 2.05E-06 |
| DTXSID1024172 | Mercury    | 7439-97-6 | Female             | 15-16 | 1.86E-06 | 1.63E-06 | 2.11E-06 |
| DTXSID1024172 | Mercury    | 7439-97-6 | 3 - 5 years        | 15-16 | 1.19E-06 | 3.86E-07 | 2.07E-06 |
| DTXSID1024172 | Mercury    | 7439-97-6 | 6 - 11 years       | 15-16 | 8.99E-07 | 6.08E-07 | 1.33E-06 |
| DTXSID1024172 | Mercury    | 7439-97-6 | 12 - 19 years      | 15-16 | 7.18E-07 | 5.83E-07 | 8.81E-07 |
| DTXSID1024172 | Mercury    | 7439-97-6 | 20 - 65 years      | 15-16 | 2.26E-06 | 2.13E-06 | 2.39E-06 |
| DTXSID1024172 | Mercury    | 7439-97-6 | 66 years and older | 15-16 | 1.87E-06 | 1.44E-06 | 2.46E-06 |
| DTXSID1024172 | Mercury    | 7439-97-6 | ReproAgeFemale     | 15-16 | 1.88E-06 | 1.63E-06 | 2.17E-06 |
| DTXSID1024172 | Mercury    | 7439-97-6 | BMI <= 30          | 15-16 | 1.87E-06 | 1.73E-06 | 2.03E-06 |
| DTXSID1024172 | Mercury    | 7439-97-6 | BMI > 30           | 15-16 | 1.81E-06 | 1.66E-06 | 1.97E-06 |
| DTXSID1024207 | Molybdenum | 7439-98-7 | Total              | 15-16 | 6.32E-04 | 6.17E-04 | 6.49E-04 |
| DTXSID1024207 | Molybdenum | 7439-98-7 | Male               | 15-16 | 7.00E-04 | 6.55E-04 | 7.50E-04 |
| DTXSID1024207 | Molybdenum | 7439-98-7 | Female             | 15-16 | 5.73E-04 | 5.48E-04 | 6.01E-04 |
| DTXSID1024207 | Molybdenum | 7439-98-7 | 3 - 5 years        | 15-16 | 2.46E-03 | 2.29E-03 | 2.64E-03 |
| DTXSID1024207 | Molybdenum | 7439-98-7 | 6 - 11 years       | 15-16 | 1.51E-03 | 1.42E-03 | 1.62E-03 |
| DTXSID1024207 | Molybdenum | 7439-98-7 | 12 - 19 years      | 15-16 | 7.82E-04 | 7.34E-04 | 8.34E-04 |
| DTXSID1024207 | Molybdenum | 7439-98-7 | 20 - 65 years      | 15-16 | 5.50E-04 | 5.28E-04 | 5.74E-04 |
| DTXSID1024207 | Molybdenum | 7439-98-7 | 66 years and older | 15-16 | 4.39E-04 | 4.16E-04 | 4.63E-04 |
| DTXSID1024207 | Molybdenum | 7439-98-7 | ReproAgeFemale     | 15-16 | 5.32E-04 | 5.06E-04 | 5.60E-04 |
| DTXSID1024207 | Molybdenum | 7439-98-7 | BMI <= 30          | 15-16 | 7.28E-04 | 7.04E-04 | 7.53E-04 |
| DTXSID1024207 | Molybdenum | 7439-98-7 | BMI > 30           | 15-16 | 4.73E-04 | 4.56E-04 | 4.92E-04 |
| DTXSID3024312 | Strontium  | 7440-24-6 | Total              | 15-16 | 1.52E-03 | 1.48E-03 | 1.57E-03 |
| DTXSID3024312 | Strontium  | 7440-24-6 | Male               | 15-16 | 1.67E-03 | 1.61E-03 | 1.74E-03 |
| DTXSID3024312 | Strontium  | 7440-24-6 | Female             | 15-16 | 1.39E-03 | 1.32E-03 | 1.47E-03 |
| DTXSID3024312 | Strontium  | 7440-24-6 | 3 - 5 years        | 15-16 | 2.78E-03 | 2.51E-03 | 3.08E-03 |
| DTXSID3024312 | Strontium  | 7440-24-6 | 6 - 11 years       | 15-16 | 2.01E-03 | 1.82E-03 | 2.21E-03 |
| DTXSID3024312 | Strontium  | 7440-24-6 | 12 - 19 years      | 15-16 | 1.45E-03 | 1.31E-03 | 1.61E-03 |
| DTXSID3024312 | Strontium  | 7440-24-6 | 20 - 65 years      | 15-16 | 1.55E-03 | 1.48E-03 | 1.63E-03 |
| DTXSID3024312 | Strontium  | 7440-24-6 | 66 years and older | 15-16 | 1.05E-03 | 9.63E-04 | 1.15E-03 |
| DTXSID3024312 | Strontium  | 7440-24-6 | ReproAgeFemale     | 15-16 | 1.42E-03 | 1.34E-03 | 1.51E-03 |
| DTXSID3024312 | Strontium  | 7440-24-6 | BMI <= 30          | 15-16 | 1.74E-03 | 1.68E-03 | 1.79E-03 |
| DTXSID3024312 | Strontium  | 7440-24-6 | BMI > 30           | 15-16 | 1.16E-03 | 1.11E-03 | 1.22E-03 |
| DTXSID2036035 | Thallium   | 7440-28-0 | Total              | 15-16 | 2.72E-06 | 2.66E-06 | 2.79E-06 |
| DTXSID2036035 | Thallium   | 7440-28-0 | Male               | 15-16 | 2.88E-06 | 2.68E-06 | 3.11E-06 |
| DTXSID2036035 | Thallium   | 7440-28-0 | Female             | 15-16 | 2.57E-06 | 2.43E-06 | 2.73E-06 |
| DTXSID2036035 | Thallium   | 7440-28-0 | 3 - 5 years        | 15-16 | 7.76E-06 | 7.44E-06 | 8.12E-06 |

|               |          |           |                    |       |          |          |          |
|---------------|----------|-----------|--------------------|-------|----------|----------|----------|
| DTXSID2036035 | Thallium | 7440-28-0 | 6 - 11 years       | 15-16 | 4.52E-06 | 4.24E-06 | 4.82E-06 |
| DTXSID2036035 | Thallium | 7440-28-0 | 12 - 19 years      | 15-16 | 2.74E-06 | 2.55E-06 | 2.94E-06 |
| DTXSID2036035 | Thallium | 7440-28-0 | 20 - 65 years      | 15-16 | 2.69E-06 | 2.50E-06 | 2.90E-06 |
| DTXSID2036035 | Thallium | 7440-28-0 | 66 years and older | 15-16 | 1.66E-06 | 1.50E-06 | 1.83E-06 |
| DTXSID2036035 | Thallium | 7440-28-0 | ReproAgeFemale     | 15-16 | 2.81E-06 | 2.69E-06 | 2.94E-06 |
| DTXSID2036035 | Thallium | 7440-28-0 | BMI <= 30          | 15-16 | 3.09E-06 | 3.00E-06 | 3.17E-06 |
| DTXSID2036035 | Thallium | 7440-28-0 | BMI > 30           | 15-16 | 2.10E-06 | 2.04E-06 | 2.18E-06 |
| DTXSID1049801 | Tin      | 7440-31-5 | Total              | 15-16 | 8.60E-06 | 8.27E-06 | 8.94E-06 |
| DTXSID1049801 | Tin      | 7440-31-5 | Male               | 15-16 | 8.23E-06 | 7.31E-06 | 9.26E-06 |
| DTXSID1049801 | Tin      | 7440-31-5 | Female             | 15-16 | 8.97E-06 | 8.24E-06 | 9.75E-06 |
| DTXSID1049801 | Tin      | 7440-31-5 | 3 - 5 years        | 15-16 | 5.87E-05 | 5.21E-05 | 6.64E-05 |
| DTXSID1049801 | Tin      | 7440-31-5 | 6 - 11 years       | 15-16 | 2.33E-05 | 2.06E-05 | 2.64E-05 |
| DTXSID1049801 | Tin      | 7440-31-5 | 12 - 19 years      | 15-16 | 7.84E-06 | 7.05E-06 | 8.71E-06 |
| DTXSID1049801 | Tin      | 7440-31-5 | 20 - 65 years      | 15-16 | 6.83E-06 | 6.24E-06 | 7.49E-06 |
| DTXSID1049801 | Tin      | 7440-31-5 | 66 years and older | 15-16 | 9.75E-06 | 8.67E-06 | 1.10E-05 |
| DTXSID1049801 | Tin      | 7440-31-5 | ReproAgeFemale     | 15-16 | 7.01E-06 | 6.47E-06 | 7.59E-06 |
| DTXSID1049801 | Tin      | 7440-31-5 | BMI <= 30          | 15-16 | 9.69E-06 | 9.24E-06 | 1.02E-05 |
| DTXSID1049801 | Tin      | 7440-31-5 | BMI > 30           | 15-16 | 6.76E-06 | 6.34E-06 | 7.19E-06 |
| DTXSID8052481 | Tungsten | 7440-33-7 | Total              | 15-16 | 1.16E-06 | 1.12E-06 | 1.20E-06 |
| DTXSID8052481 | Tungsten | 7440-33-7 | Male               | 15-16 | 1.33E-06 | 1.15E-06 | 1.54E-06 |
| DTXSID8052481 | Tungsten | 7440-33-7 | Female             | 15-16 | 1.02E-06 | 9.46E-07 | 1.10E-06 |
| DTXSID8052481 | Tungsten | 7440-33-7 | 3 - 5 years        | 15-16 | 5.73E-06 | 4.92E-06 | 6.71E-06 |
| DTXSID8052481 | Tungsten | 7440-33-7 | 6 - 11 years       | 15-16 | 3.42E-06 | 3.12E-06 | 3.77E-06 |
| DTXSID8052481 | Tungsten | 7440-33-7 | 12 - 19 years      | 15-16 | 1.68E-06 | 1.53E-06 | 1.86E-06 |
| DTXSID8052481 | Tungsten | 7440-33-7 | 20 - 65 years      | 15-16 | 9.93E-07 | 8.91E-07 | 1.11E-06 |
| DTXSID8052481 | Tungsten | 7440-33-7 | 66 years and older | 15-16 | 6.69E-07 | 5.87E-07 | 7.64E-07 |
| DTXSID8052481 | Tungsten | 7440-33-7 | ReproAgeFemale     | 15-16 | 1.03E-06 | 9.56E-07 | 1.12E-06 |
| DTXSID8052481 | Tungsten | 7440-33-7 | BMI <= 30          | 15-16 | 1.33E-06 | 1.28E-06 | 1.40E-06 |
| DTXSID8052481 | Tungsten | 7440-33-7 | BMI > 30           | 15-16 | 8.75E-07 | 8.21E-07 | 9.34E-07 |
| DTXSID5023879 | Antimony | 7440-36-0 | Total              | 15-16 | 7.71E-07 | 7.47E-07 | 7.97E-07 |
| DTXSID5023879 | Antimony | 7440-36-0 | Male               | 15-16 | 8.85E-07 | 8.11E-07 | 9.71E-07 |
| DTXSID5023879 | Antimony | 7440-36-0 | Female             | 15-16 | 6.76E-07 | 6.25E-07 | 7.33E-07 |
| DTXSID5023879 | Antimony | 7440-36-0 | 3 - 5 years        | 15-16 | 2.44E-06 | 2.19E-06 | 2.73E-06 |
| DTXSID5023879 | Antimony | 7440-36-0 | 6 - 11 years       | 15-16 | 1.60E-06 | 1.43E-06 | 1.79E-06 |
| DTXSID5023879 | Antimony | 7440-36-0 | 12 - 19 years      | 15-16 | 9.20E-07 | 8.13E-07 | 1.04E-06 |
| DTXSID5023879 | Antimony | 7440-36-0 | 20 - 65 years      | 15-16 | 7.17E-07 | 6.73E-07 | 7.67E-07 |
| DTXSID5023879 | Antimony | 7440-36-0 | 66 years and older | 15-16 | 5.02E-07 | 4.41E-07 | 5.74E-07 |
| DTXSID5023879 | Antimony | 7440-36-0 | ReproAgeFemale     | 15-16 | 7.07E-07 | 6.60E-07 | 7.57E-07 |
| DTXSID5023879 | Antimony | 7440-36-0 | BMI <= 30          | 15-16 | 8.63E-07 | 8.32E-07 | 8.95E-07 |
| DTXSID5023879 | Antimony | 7440-36-0 | BMI > 30           | 15-16 | 6.20E-07 | 5.87E-07 | 6.53E-07 |
| DTXSID8023894 | Barium   | 7440-39-3 | Total              | 15-16 | 2.04E-05 | 1.97E-05 | 2.11E-05 |
| DTXSID8023894 | Barium   | 7440-39-3 | Male               | 15-16 | 2.27E-05 | 2.08E-05 | 2.49E-05 |
| DTXSID8023894 | Barium   | 7440-39-3 | Female             | 15-16 | 1.84E-05 | 1.73E-05 | 1.96E-05 |
| DTXSID8023894 | Barium   | 7440-39-3 | 3 - 5 years        | 15-16 | 4.93E-05 | 4.47E-05 | 5.45E-05 |
| DTXSID8023894 | Barium   | 7440-39-3 | 6 - 11 years       | 15-16 | 3.50E-05 | 3.07E-05 | 4.00E-05 |
| DTXSID8023894 | Barium   | 7440-39-3 | 12 - 19 years      | 15-16 | 2.34E-05 | 2.02E-05 | 2.72E-05 |
| DTXSID8023894 | Barium   | 7440-39-3 | 20 - 65 years      | 15-16 | 1.96E-05 | 1.82E-05 | 2.12E-05 |



|               |                 |           |                    |       |          |          |          |
|---------------|-----------------|-----------|--------------------|-------|----------|----------|----------|
| DTXSID8023894 | Barium          | 7440-39-3 | 66 years and older | 15-16 | 1.28E-05 | 1.12E-05 | 1.46E-05 |
| DTXSID8023894 | Barium          | 7440-39-3 | ReproAgeFemale     | 15-16 | 1.90E-05 | 1.76E-05 | 2.04E-05 |
| DTXSID8023894 | Barium          | 7440-39-3 | BMI <= 30          | 15-16 | 2.25E-05 | 2.17E-05 | 2.35E-05 |
| DTXSID8023894 | Barium          | 7440-39-3 | BMI > 30           | 15-16 | 1.66E-05 | 1.56E-05 | 1.77E-05 |
| DTXSID1023940 | Cadmium         | 7440-43-9 | Total              | 15-16 | 2.17E-06 | 2.10E-06 | 2.25E-06 |
| DTXSID1023940 | Cadmium         | 7440-43-9 | Male               | 15-16 | 2.04E-06 | 1.91E-06 | 2.18E-06 |
| DTXSID1023940 | Cadmium         | 7440-43-9 | Female             | 15-16 | 2.31E-06 | 2.11E-06 | 2.54E-06 |
| DTXSID1023940 | Cadmium         | 7440-43-9 | 3 - 5 years        | 15-16 | 7.72E-07 | 7.10E-07 | 8.40E-07 |
| DTXSID1023940 | Cadmium         | 7440-43-9 | 6 - 11 years       | 15-16 | 8.02E-07 | 6.77E-07 | 9.50E-07 |
| DTXSID1023940 | Cadmium         | 7440-43-9 | 12 - 19 years      | 15-16 | 8.20E-07 | 7.04E-07 | 9.49E-07 |
| DTXSID1023940 | Cadmium         | 7440-43-9 | 20 - 65 years      | 15-16 | 2.66E-06 | 2.43E-06 | 2.91E-06 |
| DTXSID1023940 | Cadmium         | 7440-43-9 | 66 years and older | 15-16 | 3.76E-06 | 3.45E-06 | 4.11E-06 |
| DTXSID1023940 | Cadmium         | 7440-43-9 | ReproAgeFemale     | 15-16 | 2.13E-06 | 1.99E-06 | 2.30E-06 |
| DTXSID1023940 | Cadmium         | 7440-43-9 | BMI <= 30          | 15-16 | 2.09E-06 | 2.00E-06 | 2.18E-06 |
| DTXSID1023940 | Cadmium         | 7440-43-9 | BMI > 30           | 15-16 | 2.33E-06 | 2.21E-06 | 2.45E-06 |
| DTXSID5036767 | Cesium          | 7440-46-2 | Total              | 15-16 | 6.98E-05 | 6.85E-05 | 7.12E-05 |
| DTXSID5036767 | Cesium          | 7440-46-2 | Male               | 15-16 | 7.44E-05 | 7.11E-05 | 7.79E-05 |
| DTXSID5036767 | Cesium          | 7440-46-2 | Female             | 15-16 | 6.58E-05 | 6.29E-05 | 6.88E-05 |
| DTXSID5036767 | Cesium          | 7440-46-2 | 3 - 5 years        | 15-16 | 1.88E-04 | 1.76E-04 | 2.01E-04 |
| DTXSID5036767 | Cesium          | 7440-46-2 | 6 - 11 years       | 15-16 | 1.07E-04 | 1.01E-04 | 1.13E-04 |
| DTXSID5036767 | Cesium          | 7440-46-2 | 12 - 19 years      | 15-16 | 6.12E-05 | 5.78E-05 | 6.50E-05 |
| DTXSID5036767 | Cesium          | 7440-46-2 | 20 - 65 years      | 15-16 | 6.76E-05 | 6.42E-05 | 7.13E-05 |
| DTXSID5036767 | Cesium          | 7440-46-2 | 66 years and older | 15-16 | 5.58E-05 | 5.15E-05 | 6.04E-05 |
| DTXSID5036767 | Cesium          | 7440-46-2 | ReproAgeFemale     | 15-16 | 6.61E-05 | 6.36E-05 | 6.89E-05 |
| DTXSID5036767 | Cesium          | 7440-46-2 | BMI <= 30          | 15-16 | 7.88E-05 | 7.71E-05 | 8.05E-05 |
| DTXSID5036767 | Cesium          | 7440-46-2 | BMI > 30           | 15-16 | 5.45E-05 | 5.28E-05 | 5.64E-05 |
| DTXSID1042522 | Uranium         | 7440-61-1 | Total              | 15-16 | 8.26E-08 | 7.97E-08 | 8.56E-08 |
| DTXSID1042522 | Uranium         | 7440-61-1 | Male               | 15-16 | 8.97E-08 | 7.52E-08 | 1.07E-07 |
| DTXSID1042522 | Uranium         | 7440-61-1 | Female             | 15-16 | 7.68E-08 | 6.35E-08 | 9.41E-08 |
| DTXSID1042522 | Uranium         | 7440-61-1 | 3 - 5 years        | 15-16 | 1.87E-07 | 1.48E-07 | 2.34E-07 |
| DTXSID1042522 | Uranium         | 7440-61-1 | 6 - 11 years       | 15-16 | 1.13E-07 | 9.33E-08 | 1.36E-07 |
| DTXSID1042522 | Uranium         | 7440-61-1 | 12 - 19 years      | 15-16 | 8.78E-08 | 6.90E-08 | 1.12E-07 |
| DTXSID1042522 | Uranium         | 7440-61-1 | 20 - 65 years      | 15-16 | 7.95E-08 | 6.75E-08 | 9.41E-08 |
| DTXSID1042522 | Uranium         | 7440-61-1 | 66 years and older | 15-16 | 6.95E-08 | 5.74E-08 | 8.45E-08 |
| DTXSID1042522 | Uranium         | 7440-61-1 | ReproAgeFemale     | 15-16 | 7.58E-08 | 6.97E-08 | 8.26E-08 |
| DTXSID1042522 | Uranium         | 7440-61-1 | BMI <= 30          | 15-16 | 9.13E-08 | 8.72E-08 | 9.55E-08 |
| DTXSID1042522 | Uranium         | 7440-61-1 | BMI > 30           | 15-16 | 6.79E-08 | 6.42E-08 | 7.21E-08 |
| DTXSID5021207 | Propylene oxide | 75-56-9   | Total              | 15-16 | 1.41E-04 | 1.36E-04 | 1.45E-04 |
| DTXSID5021207 | Propylene oxide | 75-56-9   | Male               | 15-16 | 1.59E-04 | 1.49E-04 | 1.70E-04 |
| DTXSID5021207 | Propylene oxide | 75-56-9   | Female             | 15-16 | 1.25E-04 | 1.14E-04 | 1.35E-04 |
| DTXSID5021207 | Propylene oxide | 75-56-9   | 3 - 5 years        | 15-16 | 2.60E-04 | 2.34E-04 | 2.93E-04 |
| DTXSID5021207 | Propylene oxide | 75-56-9   | 6 - 11 years       | 15-16 | 1.68E-04 | 1.56E-04 | 1.80E-04 |
| DTXSID5021207 | Propylene oxide | 75-56-9   | 12 - 19 years      | 15-16 | 1.06E-04 | 9.59E-05 | 1.17E-04 |
| DTXSID5021207 | Propylene oxide | 75-56-9   | 20 - 65 years      | 15-16 | 1.49E-04 | 1.39E-04 | 1.61E-04 |
| DTXSID5021207 | Propylene oxide | 75-56-9   | 66 years and older | 15-16 | 1.05E-04 | 9.19E-05 | 1.20E-04 |
| DTXSID5021207 | Propylene oxide | 75-56-9   | ReproAgeFemale     | 15-16 | 1.36E-04 | 1.26E-04 | 1.47E-04 |
| DTXSID5021207 | Propylene oxide | 75-56-9   | BMI <= 30          | 15-16 | 1.52E-04 | 1.47E-04 | 1.59E-04 |

|               |                      |           |                    |       |          |          |          |
|---------------|----------------------|-----------|--------------------|-------|----------|----------|----------|
| DTXSID5021207 | Propylene oxide      | 75-56-9   | BMI > 30           | 15-16 | 1.19E-04 | 1.13E-04 | 1.26E-04 |
| DTXSID7020508 | Dimethylarsinic acid | 75-60-5   | Total              | 15-16 | 4.60E-05 | 4.46E-05 | 4.74E-05 |
| DTXSID7020508 | Dimethylarsinic acid | 75-60-5   | Male               | 15-16 | 4.92E-05 | 4.56E-05 | 5.32E-05 |
| DTXSID7020508 | Dimethylarsinic acid | 75-60-5   | Female             | 15-16 | 4.30E-05 | 4.03E-05 | 4.60E-05 |
| DTXSID7020508 | Dimethylarsinic acid | 75-60-5   | 3 - 5 years        | 15-16 | 1.18E-04 | 1.07E-04 | 1.30E-04 |
| DTXSID7020508 | Dimethylarsinic acid | 75-60-5   | 6 - 11 years       | 15-16 | 7.31E-05 | 6.77E-05 | 7.90E-05 |
| DTXSID7020508 | Dimethylarsinic acid | 75-60-5   | 12 - 19 years      | 15-16 | 4.08E-05 | 3.74E-05 | 4.46E-05 |
| DTXSID7020508 | Dimethylarsinic acid | 75-60-5   | 20 - 65 years      | 15-16 | 4.55E-05 | 4.21E-05 | 4.90E-05 |
| DTXSID7020508 | Dimethylarsinic acid | 75-60-5   | 66 years and older | 15-16 | 3.60E-05 | 3.20E-05 | 4.06E-05 |
| DTXSID7020508 | Dimethylarsinic acid | 75-60-5   | ReproAgeFemale     | 15-16 | 4.21E-05 | 3.89E-05 | 4.59E-05 |
| DTXSID7020508 | Dimethylarsinic acid | 75-60-5   | BMI <= 30          | 15-16 | 5.29E-05 | 5.10E-05 | 5.50E-05 |
| DTXSID7020508 | Dimethylarsinic acid | 75-60-5   | BMI > 30           | 15-16 | 3.57E-05 | 3.39E-05 | 3.75E-05 |
| DTXSID1034341 | Arsenic acid         | 7778-39-4 | Total              | 15-16 | 1.43E-06 | 1.45E-07 | 5.16E-06 |
| DTXSID1034341 | Arsenic acid         | 7778-39-4 | Male               | 15-16 | 1.77E-06 | 2.27E-07 | 5.52E-06 |
| DTXSID1034341 | Arsenic acid         | 7778-39-4 | Female             | 15-16 | 1.35E-06 | 1.16E-07 | 5.05E-06 |
| DTXSID1034341 | Arsenic acid         | 7778-39-4 | 3 - 5 years        | 15-16 | 2.78E-06 | 4.57E-07 | 6.99E-06 |
| DTXSID1034341 | Arsenic acid         | 7778-39-4 | 6 - 11 years       | 15-16 | 2.35E-06 | 3.24E-07 | 6.74E-06 |
| DTXSID1034341 | Arsenic acid         | 7778-39-4 | 12 - 19 years      | 15-16 | 1.68E-06 | 1.19E-07 | 6.35E-06 |
| DTXSID1034341 | Arsenic acid         | 7778-39-4 | 20 - 65 years      | 15-16 | 1.53E-06 | 1.34E-07 | 5.47E-06 |
| DTXSID1034341 | Arsenic acid         | 7778-39-4 | 66 years and older | 15-16 | 1.46E-06 | 1.13E-07 | 5.39E-06 |
| DTXSID1034341 | Arsenic acid         | 7778-39-4 | ReproAgeFemale     | 15-16 | 1.35E-06 | 1.11E-07 | 5.33E-06 |
| DTXSID1034341 | Arsenic acid         | 7778-39-4 | BMI <= 30          | 15-16 | 1.56E-06 | 1.80E-07 | 5.18E-06 |
| DTXSID1034341 | Arsenic acid         | 7778-39-4 | BMI > 30           | 15-16 | 1.40E-06 | 1.02E-07 | 5.61E-06 |
| DTXSID0021383 | Trichloroethene      | 79-01-6   | Total              | 15-16 | 3.76E-07 | 1.92E-09 | 9.85E-06 |
| DTXSID0021383 | Trichloroethene      | 79-01-6   | Male               | 15-16 | 3.96E-07 | 1.98E-09 | 1.07E-05 |
| DTXSID0021383 | Trichloroethene      | 79-01-6   | Female             | 15-16 | 4.09E-07 | 2.08E-09 | 1.25E-05 |
| DTXSID0021383 | Trichloroethene      | 79-01-6   | 3 - 5 years        | 15-16 | 8.01E-07 | 4.70E-09 | 2.00E-05 |
| DTXSID0021383 | Trichloroethene      | 79-01-6   | 6 - 11 years       | 15-16 | 7.41E-07 | 3.35E-09 | 2.04E-05 |
| DTXSID0021383 | Trichloroethene      | 79-01-6   | 12 - 19 years      | 15-16 | 6.90E-07 | 4.45E-09 | 2.00E-05 |
| DTXSID0021383 | Trichloroethene      | 79-01-6   | 20 - 65 years      | 15-16 | 4.35E-07 | 2.23E-09 | 1.32E-05 |
| DTXSID0021383 | Trichloroethene      | 79-01-6   | 66 years and older | 15-16 | 5.79E-07 | 2.85E-09 | 1.59E-05 |
| DTXSID0021383 | Trichloroethene      | 79-01-6   | ReproAgeFemale     | 15-16 | 5.19E-07 | 2.27E-09 | 1.53E-05 |
| DTXSID0021383 | Trichloroethene      | 79-01-6   | BMI <= 30          | 15-16 | 3.82E-07 | 2.87E-09 | 9.91E-06 |
| DTXSID0021383 | Trichloroethene      | 79-01-6   | BMI > 30           | 15-16 | 4.82E-07 | 2.40E-09 | 1.45E-05 |
| DTXSID5020027 | Acrylamide           | 79-06-1   | Total              | 15-16 | 3.62E-05 | 3.49E-05 | 3.76E-05 |
| DTXSID5020027 | Acrylamide           | 79-06-1   | Male               | 15-16 | 4.03E-05 | 3.71E-05 | 4.43E-05 |
| DTXSID5020027 | Acrylamide           | 79-06-1   | Female             | 15-16 | 3.27E-05 | 2.96E-05 | 3.60E-05 |
| DTXSID5020027 | Acrylamide           | 79-06-1   | 3 - 5 years        | 15-16 | 8.45E-05 | 7.93E-05 | 8.99E-05 |
| DTXSID5020027 | Acrylamide           | 79-06-1   | 6 - 11 years       | 15-16 | 5.33E-05 | 5.07E-05 | 5.63E-05 |
| DTXSID5020027 | Acrylamide           | 79-06-1   | 12 - 19 years      | 15-16 | 3.33E-05 | 3.06E-05 | 3.61E-05 |
| DTXSID5020027 | Acrylamide           | 79-06-1   | 20 - 65 years      | 15-16 | 3.85E-05 | 3.53E-05 | 4.22E-05 |
| DTXSID5020027 | Acrylamide           | 79-06-1   | 66 years and older | 15-16 | 2.56E-05 | 2.18E-05 | 3.01E-05 |
| DTXSID5020027 | Acrylamide           | 79-06-1   | ReproAgeFemale     | 15-16 | 3.60E-05 | 3.35E-05 | 3.89E-05 |
| DTXSID5020027 | Acrylamide           | 79-06-1   | BMI <= 30          | 15-16 | 3.76E-05 | 3.59E-05 | 3.95E-05 |
| DTXSID5020027 | Acrylamide           | 79-06-1   | BMI > 30           | 15-16 | 3.40E-05 | 3.23E-05 | 3.58E-05 |
| DTXSID7020182 | Bisphenol A          | 80-05-7   | Total              | 15-16 | 1.73E-05 | 1.67E-05 | 1.79E-05 |
| DTXSID7020182 | Bisphenol A          | 80-05-7   | Male               | 15-16 | 1.88E-05 | 1.69E-05 | 2.10E-05 |

|               |                       |         |                    |       |          |          |          |
|---------------|-----------------------|---------|--------------------|-------|----------|----------|----------|
| DTXSID7020182 | Bisphenol A           | 80-05-7 | Female             | 15-16 | 1.60E-05 | 1.49E-05 | 1.72E-05 |
| DTXSID7020182 | Bisphenol A           | 80-05-7 | 3 - 5 years        | 15-16 | 6.40E-05 | 5.16E-05 | 7.99E-05 |
| DTXSID7020182 | Bisphenol A           | 80-05-7 | 6 - 11 years       | 15-16 | 2.77E-05 | 2.44E-05 | 3.17E-05 |
| DTXSID7020182 | Bisphenol A           | 80-05-7 | 12 - 19 years      | 15-16 | 1.60E-05 | 1.47E-05 | 1.76E-05 |
| DTXSID7020182 | Bisphenol A           | 80-05-7 | 20 - 65 years      | 15-16 | 1.78E-05 | 1.64E-05 | 1.93E-05 |
| DTXSID7020182 | Bisphenol A           | 80-05-7 | 66 years and older | 15-16 | 1.14E-05 | 9.15E-06 | 1.41E-05 |
| DTXSID7020182 | Bisphenol A           | 80-05-7 | ReproAgeFemale     | 15-16 | 1.63E-05 | 1.51E-05 | 1.75E-05 |
| DTXSID7020182 | Bisphenol A           | 80-05-7 | BMI <= 30          | 15-16 | 1.82E-05 | 1.75E-05 | 1.91E-05 |
| DTXSID7020182 | Bisphenol A           | 80-05-7 | BMI > 30           | 15-16 | 1.56E-05 | 1.46E-05 | 1.66E-05 |
| DTXSID3022409 | Bisphenol S           | 80-09-1 | Total              | 15-16 | 7.08E-06 | 6.76E-06 | 7.42E-06 |
| DTXSID3022409 | Bisphenol S           | 80-09-1 | Male               | 15-16 | 7.63E-06 | 6.62E-06 | 8.85E-06 |
| DTXSID3022409 | Bisphenol S           | 80-09-1 | Female             | 15-16 | 6.62E-06 | 5.94E-06 | 7.38E-06 |
| DTXSID3022409 | Bisphenol S           | 80-09-1 | 3 - 5 years        | 15-16 | 2.05E-05 | 1.67E-05 | 2.50E-05 |
| DTXSID3022409 | Bisphenol S           | 80-09-1 | 6 - 11 years       | 15-16 | 8.42E-06 | 7.54E-06 | 9.42E-06 |
| DTXSID3022409 | Bisphenol S           | 80-09-1 | 12 - 19 years      | 15-16 | 4.68E-06 | 4.09E-06 | 5.39E-06 |
| DTXSID3022409 | Bisphenol S           | 80-09-1 | 20 - 65 years      | 15-16 | 8.11E-06 | 7.11E-06 | 9.26E-06 |
| DTXSID3022409 | Bisphenol S           | 80-09-1 | 66 years and older | 15-16 | 4.62E-06 | 3.91E-06 | 5.47E-06 |
| DTXSID3022409 | Bisphenol S           | 80-09-1 | ReproAgeFemale     | 15-16 | 7.23E-06 | 6.61E-06 | 7.95E-06 |
| DTXSID3022409 | Bisphenol S           | 80-09-1 | BMI <= 30          | 15-16 | 7.19E-06 | 6.78E-06 | 7.63E-06 |
| DTXSID3022409 | Bisphenol S           | 80-09-1 | BMI > 30           | 15-16 | 6.87E-06 | 6.37E-06 | 7.44E-06 |
| DTXSID7021780 | Diethyl phthalate     | 84-66-2 | Total              | 15-16 | 6.32E-04 | 6.04E-04 | 6.62E-04 |
| DTXSID7021780 | Diethyl phthalate     | 84-66-2 | Male               | 15-16 | 5.80E-04 | 5.29E-04 | 6.39E-04 |
| DTXSID7021780 | Diethyl phthalate     | 84-66-2 | Female             | 15-16 | 6.86E-04 | 5.97E-04 | 7.95E-04 |
| DTXSID7021780 | Diethyl phthalate     | 84-66-2 | 3 - 5 years        | 15-16 | 1.19E-03 | 1.07E-03 | 1.32E-03 |
| DTXSID7021780 | Diethyl phthalate     | 84-66-2 | 6 - 11 years       | 15-16 | 6.81E-04 | 5.61E-04 | 8.20E-04 |
| DTXSID7021780 | Diethyl phthalate     | 84-66-2 | 12 - 19 years      | 15-16 | 5.45E-04 | 4.78E-04 | 6.19E-04 |
| DTXSID7021780 | Diethyl phthalate     | 84-66-2 | 20 - 65 years      | 15-16 | 6.33E-04 | 5.68E-04 | 7.04E-04 |
| DTXSID7021780 | Diethyl phthalate     | 84-66-2 | 66 years and older | 15-16 | 5.95E-04 | 4.86E-04 | 7.34E-04 |
| DTXSID7021780 | Diethyl phthalate     | 84-66-2 | ReproAgeFemale     | 15-16 | 6.87E-04 | 6.18E-04 | 7.62E-04 |
| DTXSID7021780 | Diethyl phthalate     | 84-66-2 | BMI <= 30          | 15-16 | 6.60E-04 | 6.28E-04 | 6.96E-04 |
| DTXSID7021780 | Diethyl phthalate     | 84-66-2 | BMI > 30           | 15-16 | 5.81E-04 | 5.36E-04 | 6.35E-04 |
| DTXSID9022522 | Di-isobutyl phthalate | 84-69-5 | Total              | 15-16 | 1.70E-04 | 1.65E-04 | 1.75E-04 |
| DTXSID9022522 | Di-isobutyl phthalate | 84-69-5 | Male               | 15-16 | 1.75E-04 | 1.60E-04 | 1.92E-04 |
| DTXSID9022522 | Di-isobutyl phthalate | 84-69-5 | Female             | 15-16 | 1.65E-04 | 1.54E-04 | 1.77E-04 |
| DTXSID9022522 | Di-isobutyl phthalate | 84-69-5 | 3 - 5 years        | 15-16 | 6.14E-04 | 5.58E-04 | 6.81E-04 |
| DTXSID9022522 | Di-isobutyl phthalate | 84-69-5 | 6 - 11 years       | 15-16 | 3.35E-04 | 2.97E-04 | 3.80E-04 |
| DTXSID9022522 | Di-isobutyl phthalate | 84-69-5 | 12 - 19 years      | 15-16 | 1.73E-04 | 1.53E-04 | 1.97E-04 |
| DTXSID9022522 | Di-isobutyl phthalate | 84-69-5 | 20 - 65 years      | 15-16 | 1.60E-04 | 1.49E-04 | 1.71E-04 |
| DTXSID9022522 | Di-isobutyl phthalate | 84-69-5 | 66 years and older | 15-16 | 1.11E-04 | 9.52E-05 | 1.29E-04 |
| DTXSID9022522 | Di-isobutyl phthalate | 84-69-5 | ReproAgeFemale     | 15-16 | 1.69E-04 | 1.60E-04 | 1.79E-04 |
| DTXSID9022522 | Di-isobutyl phthalate | 84-69-5 | BMI <= 30          | 15-16 | 1.86E-04 | 1.79E-04 | 1.93E-04 |
| DTXSID9022522 | Di-isobutyl phthalate | 84-69-5 | BMI > 30           | 15-16 | 1.41E-04 | 1.34E-04 | 1.48E-04 |
| DTXSID2021781 | Dibutyl phthalate     | 84-74-2 | Total              | 15-16 | 1.34E-05 | 3.21E-08 | 1.97E-04 |
| DTXSID2021781 | Dibutyl phthalate     | 84-74-2 | Male               | 15-16 | 1.50E-05 | 2.45E-08 | 2.00E-04 |
| DTXSID2021781 | Dibutyl phthalate     | 84-74-2 | Female             | 15-16 | 1.55E-05 | 2.44E-08 | 1.97E-04 |
| DTXSID2021781 | Dibutyl phthalate     | 84-74-2 | 3 - 5 years        | 15-16 | 3.09E-05 | 4.36E-08 | 6.99E-04 |
| DTXSID2021781 | Dibutyl phthalate     | 84-74-2 | 6 - 11 years       | 15-16 | 2.02E-05 | 3.40E-08 | 4.19E-04 |

|               |                       |         |                    |       |          |          |          |
|---------------|-----------------------|---------|--------------------|-------|----------|----------|----------|
| DTXSID2021781 | Dibutyl phthalate     | 84-74-2 | 12 - 19 years      | 15-16 | 1.24E-05 | 1.80E-08 | 1.93E-04 |
| DTXSID2021781 | Dibutyl phthalate     | 84-74-2 | 20 - 65 years      | 15-16 | 1.33E-05 | 1.29E-08 | 1.79E-04 |
| DTXSID2021781 | Dibutyl phthalate     | 84-74-2 | 66 years and older | 15-16 | 1.75E-05 | 2.79E-08 | 1.66E-04 |
| DTXSID2021781 | Dibutyl phthalate     | 84-74-2 | ReproAgeFemale     | 15-16 | 1.52E-05 | 2.37E-08 | 1.86E-04 |
| DTXSID2021781 | Dibutyl phthalate     | 84-74-2 | BMI <= 30          | 15-16 | 1.65E-05 | 1.66E-08 | 2.16E-04 |
| DTXSID2021781 | Dibutyl phthalate     | 84-74-2 | BMI > 30           | 15-16 | 1.38E-05 | 3.22E-08 | 1.65E-04 |
| DTXSID6024254 | Phenanthrene          | 85-01-8 | Total              | 15-16 | 1.70E-06 | 1.66E-06 | 1.74E-06 |
| DTXSID6024254 | Phenanthrene          | 85-01-8 | Male               | 15-16 | 1.87E-06 | 1.68E-06 | 2.08E-06 |
| DTXSID6024254 | Phenanthrene          | 85-01-8 | Female             | 15-16 | 1.55E-06 | 1.47E-06 | 1.65E-06 |
| DTXSID6024254 | Phenanthrene          | 85-01-8 | 3 - 5 years        | 15-16 | 3.21E-06 | 3.00E-06 | 3.43E-06 |
| DTXSID6024254 | Phenanthrene          | 85-01-8 | 6 - 11 years       | 15-16 | 2.08E-06 | 1.89E-06 | 2.28E-06 |
| DTXSID6024254 | Phenanthrene          | 85-01-8 | 12 - 19 years      | 15-16 | 1.41E-06 | 1.27E-06 | 1.57E-06 |
| DTXSID6024254 | Phenanthrene          | 85-01-8 | 20 - 65 years      | 15-16 | 1.77E-06 | 1.61E-06 | 1.94E-06 |
| DTXSID6024254 | Phenanthrene          | 85-01-8 | 66 years and older | 15-16 | 1.25E-06 | 1.13E-06 | 1.38E-06 |
| DTXSID6024254 | Phenanthrene          | 85-01-8 | ReproAgeFemale     | 15-16 | 1.70E-06 | 1.61E-06 | 1.80E-06 |
| DTXSID6024254 | Phenanthrene          | 85-01-8 | BMI <= 30          | 15-16 | 1.79E-06 | 1.74E-06 | 1.85E-06 |
| DTXSID6024254 | Phenanthrene          | 85-01-8 | BMI > 30           | 15-16 | 1.52E-06 | 1.45E-06 | 1.59E-06 |
| DTXSID3020205 | Benzylbutyl phthalate | 85-68-7 | Total              | 15-16 | 2.27E-04 | 9.50E-05 | 3.20E-04 |
| DTXSID3020205 | Benzylbutyl phthalate | 85-68-7 | Male               | 15-16 | 2.27E-04 | 9.64E-05 | 3.33E-04 |
| DTXSID3020205 | Benzylbutyl phthalate | 85-68-7 | Female             | 15-16 | 2.19E-04 | 9.23E-05 | 3.26E-04 |
| DTXSID3020205 | Benzylbutyl phthalate | 85-68-7 | 3 - 5 years        | 15-16 | 1.11E-03 | 5.63E-04 | 1.45E-03 |
| DTXSID3020205 | Benzylbutyl phthalate | 85-68-7 | 6 - 11 years       | 15-16 | 6.60E-04 | 3.35E-04 | 8.58E-04 |
| DTXSID3020205 | Benzylbutyl phthalate | 85-68-7 | 12 - 19 years      | 15-16 | 2.35E-04 | 1.03E-04 | 3.51E-04 |
| DTXSID3020205 | Benzylbutyl phthalate | 85-68-7 | 20 - 65 years      | 15-16 | 1.96E-04 | 8.22E-05 | 2.91E-04 |
| DTXSID3020205 | Benzylbutyl phthalate | 85-68-7 | 66 years and older | 15-16 | 1.39E-04 | 4.94E-05 | 2.47E-04 |
| DTXSID3020205 | Benzylbutyl phthalate | 85-68-7 | ReproAgeFemale     | 15-16 | 2.06E-04 | 8.93E-05 | 3.06E-04 |
| DTXSID3020205 | Benzylbutyl phthalate | 85-68-7 | BMI <= 30          | 15-16 | 2.45E-04 | 1.06E-04 | 3.53E-04 |
| DTXSID3020205 | Benzylbutyl phthalate | 85-68-7 | BMI > 30           | 15-16 | 1.82E-04 | 7.53E-05 | 2.66E-04 |
| DTXSID8024105 | Fluorene              | 86-73-7 | Total              | 15-16 | 4.42E-06 | 4.30E-06 | 4.54E-06 |
| DTXSID8024105 | Fluorene              | 86-73-7 | Male               | 15-16 | 5.19E-06 | 4.82E-06 | 5.60E-06 |
| DTXSID8024105 | Fluorene              | 86-73-7 | Female             | 15-16 | 3.80E-06 | 3.56E-06 | 4.07E-06 |
| DTXSID8024105 | Fluorene              | 86-73-7 | 3 - 5 years        | 15-16 | 7.29E-06 | 7.02E-06 | 7.58E-06 |
| DTXSID8024105 | Fluorene              | 86-73-7 | 6 - 11 years       | 15-16 | 4.69E-06 | 4.31E-06 | 5.12E-06 |
| DTXSID8024105 | Fluorene              | 86-73-7 | 12 - 19 years      | 15-16 | 3.37E-06 | 3.19E-06 | 3.57E-06 |
| DTXSID8024105 | Fluorene              | 86-73-7 | 20 - 65 years      | 15-16 | 5.02E-06 | 4.61E-06 | 5.48E-06 |
| DTXSID8024105 | Fluorene              | 86-73-7 | 66 years and older | 15-16 | 2.58E-06 | 2.32E-06 | 2.91E-06 |
| DTXSID8024105 | Fluorene              | 86-73-7 | ReproAgeFemale     | 15-16 | 4.59E-06 | 4.32E-06 | 4.88E-06 |
| DTXSID8024105 | Fluorene              | 86-73-7 | BMI <= 30          | 15-16 | 4.74E-06 | 4.60E-06 | 4.90E-06 |
| DTXSID8024105 | Fluorene              | 86-73-7 | BMI > 30           | 15-16 | 3.83E-06 | 3.65E-06 | 4.03E-06 |
| DTXSID8020913 | Naphthalene           | 91-20-3 | Total              | 15-16 | 6.77E-06 | 9.45E-09 | 2.11E-04 |
| DTXSID8020913 | Naphthalene           | 91-20-3 | Male               | 15-16 | 7.49E-06 | 1.61E-08 | 2.89E-04 |
| DTXSID8020913 | Naphthalene           | 91-20-3 | Female             | 15-16 | 7.01E-06 | 1.14E-08 | 2.27E-04 |
| DTXSID8020913 | Naphthalene           | 91-20-3 | 3 - 5 years        | 15-16 | 1.37E-05 | 2.81E-08 | 4.85E-04 |
| DTXSID8020913 | Naphthalene           | 91-20-3 | 6 - 11 years       | 15-16 | 7.91E-06 | 1.79E-08 | 2.50E-04 |
| DTXSID8020913 | Naphthalene           | 91-20-3 | 12 - 19 years      | 15-16 | 4.96E-06 | 1.43E-08 | 1.35E-04 |
| DTXSID8020913 | Naphthalene           | 91-20-3 | 20 - 65 years      | 15-16 | 8.60E-06 | 1.61E-08 | 2.77E-04 |
| DTXSID8020913 | Naphthalene           | 91-20-3 | 66 years and older | 15-16 | 7.61E-06 | 1.55E-08 | 2.82E-04 |

|               |                                |         |                    |       |          |          |          |
|---------------|--------------------------------|---------|--------------------|-------|----------|----------|----------|
| DTXSID8020913 | Naphthalene                    | 91-20-3 | ReproAgeFemale     | 15-16 | 6.18E-06 | 9.87E-09 | 2.30E-04 |
| DTXSID8020913 | Naphthalene                    | 91-20-3 | BMI <= 30          | 15-16 | 6.91E-06 | 1.08E-08 | 2.31E-04 |
| DTXSID8020913 | Naphthalene                    | 91-20-3 | BMI > 30           | 15-16 | 6.93E-06 | 1.44E-08 | 2.67E-04 |
| DTXSID4022527 | n-propyl paraben               | 94-13-3 | Total              | 15-16 | 6.65E-05 | 6.15E-05 | 7.18E-05 |
| DTXSID4022527 | n-propyl paraben               | 94-13-3 | Male               | 15-16 | 3.05E-05 | 2.71E-05 | 3.46E-05 |
| DTXSID4022527 | n-propyl paraben               | 94-13-3 | Female             | 15-16 | 1.41E-04 | 1.11E-04 | 1.80E-04 |
| DTXSID4022527 | n-propyl paraben               | 94-13-3 | 3 - 5 years        | 15-16 | 1.69E-04 | 1.29E-04 | 2.21E-04 |
| DTXSID4022527 | n-propyl paraben               | 94-13-3 | 6 - 11 years       | 15-16 | 5.02E-05 | 4.20E-05 | 6.00E-05 |
| DTXSID4022527 | n-propyl paraben               | 94-13-3 | 12 - 19 years      | 15-16 | 4.10E-05 | 2.91E-05 | 5.86E-05 |
| DTXSID4022527 | n-propyl paraben               | 94-13-3 | 20 - 65 years      | 15-16 | 7.34E-05 | 6.20E-05 | 8.77E-05 |
| DTXSID4022527 | n-propyl paraben               | 94-13-3 | 66 years and older | 15-16 | 6.91E-05 | 4.54E-05 | 1.07E-04 |
| DTXSID4022527 | n-propyl paraben               | 94-13-3 | ReproAgeFemale     | 15-16 | 1.49E-04 | 1.27E-04 | 1.76E-04 |
| DTXSID4022527 | n-propyl paraben               | 94-13-3 | BMI <= 30          | 15-16 | 7.26E-05 | 6.58E-05 | 8.00E-05 |
| DTXSID4022527 | n-propyl paraben               | 94-13-3 | BMI > 30           | 15-16 | 5.59E-05 | 4.85E-05 | 6.44E-05 |
| DTXSID3020209 | Butyl paraben                  | 94-26-8 | Total              | 15-16 | 6.83E-07 | 2.95E-07 | 1.13E-06 |
| DTXSID3020209 | Butyl paraben                  | 94-26-8 | Male               | 15-16 | 4.50E-07 | 1.26E-07 | 8.98E-07 |
| DTXSID3020209 | Butyl paraben                  | 94-26-8 | Female             | 15-16 | 1.02E-06 | 6.19E-07 | 1.40E-06 |
| DTXSID3020209 | Butyl paraben                  | 94-26-8 | 3 - 5 years        | 15-16 | 7.13E-07 | 2.58E-07 | 1.18E-06 |
| DTXSID3020209 | Butyl paraben                  | 94-26-8 | 6 - 11 years       | 15-16 | 6.83E-07 | 2.63E-07 | 1.16E-06 |
| DTXSID3020209 | Butyl paraben                  | 94-26-8 | 12 - 19 years      | 15-16 | 6.43E-07 | 2.08E-07 | 1.18E-06 |
| DTXSID3020209 | Butyl paraben                  | 94-26-8 | 20 - 65 years      | 15-16 | 7.98E-07 | 3.72E-07 | 1.27E-06 |
| DTXSID3020209 | Butyl paraben                  | 94-26-8 | 66 years and older | 15-16 | 6.89E-07 | 2.48E-07 | 1.18E-06 |
| DTXSID3020209 | Butyl paraben                  | 94-26-8 | ReproAgeFemale     | 15-16 | 1.16E-06 | 7.29E-07 | 1.51E-06 |
| DTXSID3020209 | Butyl paraben                  | 94-26-8 | BMI <= 30          | 15-16 | 7.04E-07 | 3.04E-07 | 1.12E-06 |
| DTXSID3020209 | Butyl paraben                  | 94-26-8 | BMI > 30           | 15-16 | 7.20E-07 | 3.00E-07 | 1.22E-06 |
| DTXSID0020442 | 2,4-Dichlorophenoxyacetic acid | 94-75-7 | Total              | 15-16 | 4.63E-07 | 3.29E-09 | 7.59E-06 |
| DTXSID0020442 | 2,4-Dichlorophenoxyacetic acid | 94-75-7 | Male               | 15-16 | 4.94E-07 | 3.59E-09 | 7.78E-06 |
| DTXSID0020442 | 2,4-Dichlorophenoxyacetic acid | 94-75-7 | Female             | 15-16 | 4.26E-07 | 3.38E-09 | 7.14E-06 |
| DTXSID0020442 | 2,4-Dichlorophenoxyacetic acid | 94-75-7 | 3 - 5 years        | 15-16 | 1.16E-06 | 6.29E-09 | 2.23E-05 |
| DTXSID0020442 | 2,4-Dichlorophenoxyacetic acid | 94-75-7 | 6 - 11 years       | 15-16 | 7.76E-07 | 5.50E-09 | 1.39E-05 |
| DTXSID0020442 | 2,4-Dichlorophenoxyacetic acid | 94-75-7 | 12 - 19 years      | 15-16 | 5.47E-07 | 3.55E-09 | 9.30E-06 |
| DTXSID0020442 | 2,4-Dichlorophenoxyacetic acid | 94-75-7 | 20 - 65 years      | 15-16 | 4.18E-07 | 3.21E-09 | 6.63E-06 |
| DTXSID0020442 | 2,4-Dichlorophenoxyacetic acid | 94-75-7 | 66 years and older | 15-16 | 4.03E-07 | 3.25E-09 | 6.22E-06 |
| DTXSID0020442 | 2,4-Dichlorophenoxyacetic acid | 94-75-7 | ReproAgeFemale     | 15-16 | 4.58E-07 | 3.61E-09 | 7.39E-06 |
| DTXSID0020442 | 2,4-Dichlorophenoxyacetic acid | 94-75-7 | BMI <= 30          | 15-16 | 4.62E-07 | 2.57E-09 | 8.31E-06 |
| DTXSID0020442 | 2,4-Dichlorophenoxyacetic acid | 94-75-7 | BMI > 30           | 15-16 | 4.03E-07 | 3.45E-09 | 6.28E-06 |
| DTXSID8040274 | Dichlofenthion                 | 97-17-6 | Total              | 15-16 | 6.42E-07 | 4.02E-09 | 1.04E-05 |
| DTXSID8040274 | Dichlofenthion                 | 97-17-6 | Male               | 15-16 | 6.58E-07 | 4.49E-09 | 1.11E-05 |
| DTXSID8040274 | Dichlofenthion                 | 97-17-6 | Female             | 15-16 | 6.10E-07 | 5.48E-09 | 1.00E-05 |
| DTXSID8040274 | Dichlofenthion                 | 97-17-6 | 3 - 5 years        | 15-16 | 1.67E-06 | 1.02E-08 | 3.00E-05 |
| DTXSID8040274 | Dichlofenthion                 | 97-17-6 | 6 - 11 years       | 15-16 | 1.13E-06 | 9.81E-09 | 1.97E-05 |
| DTXSID8040274 | Dichlofenthion                 | 97-17-6 | 12 - 19 years      | 15-16 | 8.12E-07 | 5.02E-09 | 1.36E-05 |
| DTXSID8040274 | Dichlofenthion                 | 97-17-6 | 20 - 65 years      | 15-16 | 6.07E-07 | 5.31E-09 | 9.90E-06 |
| DTXSID8040274 | Dichlofenthion                 | 97-17-6 | 66 years and older | 15-16 | 5.59E-07 | 4.58E-09 | 8.51E-06 |
| DTXSID8040274 | Dichlofenthion                 | 97-17-6 | ReproAgeFemale     | 15-16 | 6.51E-07 | 4.81E-09 | 1.06E-05 |
| DTXSID8040274 | Dichlofenthion                 | 97-17-6 | BMI <= 30          | 15-16 | 7.02E-07 | 5.80E-09 | 1.16E-05 |
| DTXSID8040274 | Dichlofenthion                 | 97-17-6 | BMI > 30           | 15-16 | 5.39E-07 | 2.99E-09 | 8.99E-06 |

|               |                                                    |             |                    |       |          |          |          |
|---------------|----------------------------------------------------|-------------|--------------------|-------|----------|----------|----------|
| DTXSID4022529 | Methyl paraben                                     | 99-76-3     | Total              | 15-16 | 5.02E-04 | 4.68E-04 | 5.38E-04 |
| DTXSID4022529 | Methyl paraben                                     | 99-76-3     | Male               | 15-16 | 2.82E-04 | 2.48E-04 | 3.21E-04 |
| DTXSID4022529 | Methyl paraben                                     | 99-76-3     | Female             | 15-16 | 8.71E-04 | 7.41E-04 | 1.03E-03 |
| DTXSID4022529 | Methyl paraben                                     | 99-76-3     | 3 - 5 years        | 15-16 | 1.17E-03 | 9.12E-04 | 1.52E-03 |
| DTXSID4022529 | Methyl paraben                                     | 99-76-3     | 6 - 11 years       | 15-16 | 4.08E-04 | 3.44E-04 | 4.88E-04 |
| DTXSID4022529 | Methyl paraben                                     | 99-76-3     | 12 - 19 years      | 15-16 | 3.17E-04 | 2.31E-04 | 4.36E-04 |
| DTXSID4022529 | Methyl paraben                                     | 99-76-3     | 20 - 65 years      | 15-16 | 5.54E-04 | 4.83E-04 | 6.38E-04 |
| DTXSID4022529 | Methyl paraben                                     | 99-76-3     | 66 years and older | 15-16 | 4.83E-04 | 3.27E-04 | 7.24E-04 |
| DTXSID4022529 | Methyl paraben                                     | 99-76-3     | ReproAgeFemale     | 15-16 | 8.66E-04 | 7.52E-04 | 9.98E-04 |
| DTXSID4022529 | Methyl paraben                                     | 99-76-3     | BMI <= 30          | 15-16 | 5.51E-04 | 5.07E-04 | 6.02E-04 |
| DTXSID4022529 | Methyl paraben                                     | 99-76-3     | BMI > 30           | 15-16 | 4.16E-04 | 3.71E-04 | 4.69E-04 |
| DTXSID9059208 | 4-Nitroanisole                                     | 100-17-4    | Total              | 13-14 | 1.99E-07 | 1.66E-10 | 9.43E-06 |
| DTXSID9059208 | 4-Nitroanisole                                     | 100-17-4    | Male               | 13-14 | 1.92E-07 | 1.89E-10 | 9.69E-06 |
| DTXSID9059208 | 4-Nitroanisole                                     | 100-17-4    | Female             | 13-14 | 1.66E-07 | 1.26E-10 | 9.21E-06 |
| DTXSID9059208 | 4-Nitroanisole                                     | 100-17-4    | 6 - 11 years       | 13-14 | 3.37E-07 | 3.34E-10 | 1.80E-05 |
| DTXSID9059208 | 4-Nitroanisole                                     | 100-17-4    | 12 - 19 years      | 13-14 | 1.67E-07 | 1.83E-10 | 8.40E-06 |
| DTXSID9059208 | 4-Nitroanisole                                     | 100-17-4    | 20 - 65 years      | 13-14 | 1.96E-07 | 2.18E-10 | 9.07E-06 |
| DTXSID9059208 | 4-Nitroanisole                                     | 100-17-4    | 66 years and older | 13-14 | 1.70E-07 | 2.20E-10 | 8.25E-06 |
| DTXSID9059208 | 4-Nitroanisole                                     | 100-17-4    | ReproAgeFemale     | 13-14 | 2.02E-07 | 2.51E-10 | 9.20E-06 |
| DTXSID9059208 | 4-Nitroanisole                                     | 100-17-4    | BMI <= 30          | 13-14 | 2.00E-07 | 1.57E-10 | 1.07E-05 |
| DTXSID9059208 | 4-Nitroanisole                                     | 100-17-4    | BMI > 30           | 13-14 | 1.52E-07 | 1.45E-10 | 6.85E-06 |
| DTXSID3037628 | 2-Amino-1-methyl-6-phenylimidazo[4,5-b]105650-23-5 | 105650-23-5 | Total              | 13-14 | 8.53E-09 | 7.83E-09 | 9.32E-09 |
| DTXSID3037628 | 2-Amino-1-methyl-6-phenylimidazo[4,5-b]105650-23-5 | 105650-23-5 | Male               | 13-14 | 1.02E-08 | 9.15E-09 | 1.14E-08 |
| DTXSID3037628 | 2-Amino-1-methyl-6-phenylimidazo[4,5-b]105650-23-5 | 105650-23-5 | Female             | 13-14 | 7.09E-09 | 5.81E-09 | 8.75E-09 |
| DTXSID3037628 | 2-Amino-1-methyl-6-phenylimidazo[4,5-b]105650-23-5 | 105650-23-5 | 6 - 11 years       | 13-14 | 6.56E-09 | 4.63E-09 | 9.36E-09 |
| DTXSID3037628 | 2-Amino-1-methyl-6-phenylimidazo[4,5-b]105650-23-5 | 105650-23-5 | 12 - 19 years      | 13-14 | 8.40E-09 | 6.48E-09 | 1.09E-08 |
| DTXSID3037628 | 2-Amino-1-methyl-6-phenylimidazo[4,5-b]105650-23-5 | 105650-23-5 | 20 - 65 years      | 13-14 | 9.91E-09 | 8.88E-09 | 1.11E-08 |
| DTXSID3037628 | 2-Amino-1-methyl-6-phenylimidazo[4,5-b]105650-23-5 | 105650-23-5 | 66 years and older | 13-14 | 4.91E-09 | 3.52E-09 | 6.97E-09 |
| DTXSID3037628 | 2-Amino-1-methyl-6-phenylimidazo[4,5-b]105650-23-5 | 105650-23-5 | ReproAgeFemale     | 13-14 | 9.33E-09 | 7.83E-09 | 1.11E-08 |
| DTXSID3037628 | 2-Amino-1-methyl-6-phenylimidazo[4,5-b]105650-23-5 | 105650-23-5 | BMI <= 30          | 13-14 | 8.64E-09 | 7.74E-09 | 9.65E-09 |
| DTXSID3037628 | 2-Amino-1-methyl-6-phenylimidazo[4,5-b]105650-23-5 | 105650-23-5 | BMI > 30           | 13-14 | 8.27E-09 | 7.12E-09 | 9.65E-09 |
| DTXSID5021411 | Tris(2-chloroethyl) phosphate (TCETP)              | 115-96-8    | Total              | 13-14 | 8.60E-06 | 8.22E-06 | 9.01E-06 |
| DTXSID5021411 | Tris(2-chloroethyl) phosphate (TCETP)              | 115-96-8    | Male               | 13-14 | 9.40E-06 | 8.35E-06 | 1.06E-05 |
| DTXSID5021411 | Tris(2-chloroethyl) phosphate (TCETP)              | 115-96-8    | Female             | 13-14 | 7.92E-06 | 6.95E-06 | 9.05E-06 |
| DTXSID5021411 | Tris(2-chloroethyl) phosphate (TCETP)              | 115-96-8    | 6 - 11 years       | 13-14 | 2.06E-05 | 1.77E-05 | 2.41E-05 |
| DTXSID5021411 | Tris(2-chloroethyl) phosphate (TCETP)              | 115-96-8    | 12 - 19 years      | 13-14 | 1.14E-05 | 9.68E-06 | 1.34E-05 |
| DTXSID5021411 | Tris(2-chloroethyl) phosphate (TCETP)              | 115-96-8    | 20 - 65 years      | 13-14 | 7.83E-06 | 6.93E-06 | 8.85E-06 |
| DTXSID5021411 | Tris(2-chloroethyl) phosphate (TCETP)              | 115-96-8    | 66 years and older | 13-14 | 6.08E-06 | 5.15E-06 | 7.19E-06 |
| DTXSID5021411 | Tris(2-chloroethyl) phosphate (TCETP)              | 115-96-8    | ReproAgeFemale     | 13-14 | 8.13E-06 | 7.42E-06 | 8.94E-06 |
| DTXSID5021411 | Tris(2-chloroethyl) phosphate (TCETP)              | 115-96-8    | BMI <= 30          | 13-14 | 9.46E-06 | 8.95E-06 | 1.00E-05 |
| DTXSID5021411 | Tris(2-chloroethyl) phosphate (TCETP)              | 115-96-8    | BMI > 30           | 13-14 | 7.02E-06 | 6.47E-06 | 7.65E-06 |
| DTXSID3024499 | 4-Aminophenol                                      | 123-30-8    | Total              | 13-14 | 1.31E-07 | 1.42E-10 | 6.58E-06 |
| DTXSID3024499 | 4-Aminophenol                                      | 123-30-8    | Male               | 13-14 | 1.42E-07 | 8.30E-11 | 6.81E-06 |
| DTXSID3024499 | 4-Aminophenol                                      | 123-30-8    | Female             | 13-14 | 1.24E-07 | 1.06E-10 | 6.52E-06 |
| DTXSID3024499 | 4-Aminophenol                                      | 123-30-8    | 6 - 11 years       | 13-14 | 2.27E-07 | 1.62E-10 | 1.29E-05 |
| DTXSID3024499 | 4-Aminophenol                                      | 123-30-8    | 12 - 19 years      | 13-14 | 1.14E-07 | 1.10E-10 | 5.95E-06 |
| DTXSID3024499 | 4-Aminophenol                                      | 123-30-8    | 20 - 65 years      | 13-14 | 1.22E-07 | 1.17E-10 | 6.02E-06 |

|               |                                          |            |                    |       |          |          |          |
|---------------|------------------------------------------|------------|--------------------|-------|----------|----------|----------|
| DTXSID3024499 | 4-Aminophenol                            | 123-30-8   | 66 years and older | 13-14 | 1.43E-07 | 1.49E-10 | 6.24E-06 |
| DTXSID3024499 | 4-Aminophenol                            | 123-30-8   | ReproAgeFemale     | 13-14 | 1.14E-07 | 1.21E-10 | 6.38E-06 |
| DTXSID3024499 | 4-Aminophenol                            | 123-30-8   | BMI <= 30          | 13-14 | 1.32E-07 | 1.21E-10 | 7.40E-06 |
| DTXSID3024499 | 4-Aminophenol                            | 123-30-8   | BMI > 30           | 13-14 | 1.09E-07 | 1.62E-10 | 4.93E-06 |
| DTXSID3021986 | Tri-n-butyl phosphate (TBuP)             | 126-73-8   | Total              | 13-14 | 3.80E-06 | 3.66E-06 | 3.95E-06 |
| DTXSID3021986 | Tri-n-butyl phosphate (TBuP)             | 126-73-8   | Male               | 13-14 | 3.86E-06 | 3.28E-06 | 4.57E-06 |
| DTXSID3021986 | Tri-n-butyl phosphate (TBuP)             | 126-73-8   | Female             | 13-14 | 3.74E-06 | 3.12E-06 | 4.48E-06 |
| DTXSID3021986 | Tri-n-butyl phosphate (TBuP)             | 126-73-8   | 6 - 11 years       | 13-14 | 7.87E-06 | 6.09E-06 | 1.01E-05 |
| DTXSID3021986 | Tri-n-butyl phosphate (TBuP)             | 126-73-8   | 12 - 19 years      | 13-14 | 3.79E-06 | 3.28E-06 | 4.39E-06 |
| DTXSID3021986 | Tri-n-butyl phosphate (TBuP)             | 126-73-8   | 20 - 65 years      | 13-14 | 3.51E-06 | 2.93E-06 | 4.24E-06 |
| DTXSID3021986 | Tri-n-butyl phosphate (TBuP)             | 126-73-8   | 66 years and older | 13-14 | 3.57E-06 | 3.01E-06 | 4.26E-06 |
| DTXSID3021986 | Tri-n-butyl phosphate (TBuP)             | 126-73-8   | ReproAgeFemale     | 13-14 | 3.56E-06 | 3.30E-06 | 3.84E-06 |
| DTXSID3021986 | Tri-n-butyl phosphate (TBuP)             | 126-73-8   | BMI <= 30          | 13-14 | 4.33E-06 | 4.15E-06 | 4.53E-06 |
| DTXSID3021986 | Tri-n-butyl phosphate (TBuP)             | 126-73-8   | BMI > 30           | 13-14 | 2.89E-06 | 2.72E-06 | 3.08E-06 |
| DTXSID2021995 | N,N-Diethyl-3-methylbenzamide            | 134-62-3   | Total              | 13-14 | 4.09E-07 | 9.89E-08 | 8.67E-07 |
| DTXSID2021995 | N,N-Diethyl-3-methylbenzamide            | 134-62-3   | Male               | 13-14 | 4.82E-07 | 1.46E-07 | 9.49E-07 |
| DTXSID2021995 | N,N-Diethyl-3-methylbenzamide            | 134-62-3   | Female             | 13-14 | 3.68E-07 | 6.71E-08 | 8.33E-07 |
| DTXSID2021995 | N,N-Diethyl-3-methylbenzamide            | 134-62-3   | 6 - 11 years       | 13-14 | 5.93E-07 | 2.22E-07 | 1.08E-06 |
| DTXSID2021995 | N,N-Diethyl-3-methylbenzamide            | 134-62-3   | 12 - 19 years      | 13-14 | 5.31E-07 | 1.59E-07 | 1.03E-06 |
| DTXSID2021995 | N,N-Diethyl-3-methylbenzamide            | 134-62-3   | 20 - 65 years      | 13-14 | 4.36E-07 | 1.02E-07 | 8.92E-07 |
| DTXSID2021995 | N,N-Diethyl-3-methylbenzamide            | 134-62-3   | 66 years and older | 13-14 | 4.35E-07 | 1.08E-07 | 8.64E-07 |
| DTXSID2021995 | N,N-Diethyl-3-methylbenzamide            | 134-62-3   | ReproAgeFemale     | 13-14 | 3.82E-07 | 7.74E-08 | 8.89E-07 |
| DTXSID2021995 | N,N-Diethyl-3-methylbenzamide            | 134-62-3   | BMI <= 30          | 13-14 | 4.42E-07 | 1.07E-07 | 9.18E-07 |
| DTXSID2021995 | N,N-Diethyl-3-methylbenzamide            | 134-62-3   | BMI > 30           | 13-14 | 4.26E-07 | 1.07E-07 | 9.02E-07 |
| DTXSID5026259 | Tris(1-chloro-2-propyl) phosphate (TCPP) | 13674-84-5 | Total              | 13-14 | 3.13E-06 | 2.97E-06 | 3.31E-06 |
| DTXSID5026259 | Tris(1-chloro-2-propyl) phosphate (TCPP) | 13674-84-5 | Male               | 13-14 | 3.30E-06 | 2.95E-06 | 3.71E-06 |
| DTXSID5026259 | Tris(1-chloro-2-propyl) phosphate (TCPP) | 13674-84-5 | Female             | 13-14 | 2.99E-06 | 2.64E-06 | 3.40E-06 |
| DTXSID5026259 | Tris(1-chloro-2-propyl) phosphate (TCPP) | 13674-84-5 | 6 - 11 years       | 13-14 | 7.36E-06 | 6.30E-06 | 8.63E-06 |
| DTXSID5026259 | Tris(1-chloro-2-propyl) phosphate (TCPP) | 13674-84-5 | 12 - 19 years      | 13-14 | 3.01E-06 | 2.52E-06 | 3.62E-06 |
| DTXSID5026259 | Tris(1-chloro-2-propyl) phosphate (TCPP) | 13674-84-5 | 20 - 65 years      | 13-14 | 3.05E-06 | 2.72E-06 | 3.43E-06 |
| DTXSID5026259 | Tris(1-chloro-2-propyl) phosphate (TCPP) | 13674-84-5 | 66 years and older | 13-14 | 2.23E-06 | 1.92E-06 | 2.60E-06 |
| DTXSID5026259 | Tris(1-chloro-2-propyl) phosphate (TCPP) | 13674-84-5 | ReproAgeFemale     | 13-14 | 3.43E-06 | 3.09E-06 | 3.79E-06 |
| DTXSID5026259 | Tris(1-chloro-2-propyl) phosphate (TCPP) | 13674-84-5 | BMI <= 30          | 13-14 | 3.35E-06 | 3.13E-06 | 3.61E-06 |
| DTXSID5026259 | Tris(1-chloro-2-propyl) phosphate (TCPP) | 13674-84-5 | BMI > 30           | 13-14 | 2.73E-06 | 2.51E-06 | 2.97E-06 |
| DTXSID3061897 | Tribenzyl phosphate (TBzP)               | 1707-92-2  | Total              | 13-14 | 4.38E-09 | 2.64E-11 | 8.40E-08 |
| DTXSID3061897 | Tribenzyl phosphate (TBzP)               | 1707-92-2  | Male               | 13-14 | 5.42E-09 | 2.28E-11 | 1.05E-07 |
| DTXSID3061897 | Tribenzyl phosphate (TBzP)               | 1707-92-2  | Female             | 13-14 | 4.69E-09 | 2.09E-11 | 9.54E-08 |
| DTXSID3061897 | Tribenzyl phosphate (TBzP)               | 1707-92-2  | 6 - 11 years       | 13-14 | 8.57E-09 | 5.31E-11 | 1.63E-07 |
| DTXSID3061897 | Tribenzyl phosphate (TBzP)               | 1707-92-2  | 12 - 19 years      | 13-14 | 7.96E-09 | 3.38E-11 | 1.57E-07 |
| DTXSID3061897 | Tribenzyl phosphate (TBzP)               | 1707-92-2  | 20 - 65 years      | 13-14 | 5.59E-09 | 3.19E-11 | 1.08E-07 |
| DTXSID3061897 | Tribenzyl phosphate (TBzP)               | 1707-92-2  | 66 years and older | 13-14 | 6.88E-09 | 3.41E-11 | 1.34E-07 |
| DTXSID3061897 | Tribenzyl phosphate (TBzP)               | 1707-92-2  | ReproAgeFemale     | 13-14 | 6.72E-09 | 4.16E-11 | 1.29E-07 |
| DTXSID3061897 | Tribenzyl phosphate (TBzP)               | 1707-92-2  | BMI <= 30          | 13-14 | 4.88E-09 | 2.86E-11 | 9.63E-08 |
| DTXSID3061897 | Tribenzyl phosphate (TBzP)               | 1707-92-2  | BMI > 30           | 13-14 | 6.42E-09 | 4.19E-11 | 1.16E-07 |
| DTXSID0041775 | Chlornitrofen                            | 1836-77-7  | Total              | 13-14 | 4.00E-07 | 4.38E-10 | 1.89E-05 |
| DTXSID0041775 | Chlornitrofen                            | 1836-77-7  | Male               | 13-14 | 3.86E-07 | 4.73E-10 | 2.00E-05 |
| DTXSID0041775 | Chlornitrofen                            | 1836-77-7  | Female             | 13-14 | 3.51E-07 | 3.50E-10 | 1.85E-05 |

|               |                                         |             |                    |       |          |          |          |
|---------------|-----------------------------------------|-------------|--------------------|-------|----------|----------|----------|
| DTXSID0041775 | Chlornitrofen                           | 1836-77-7   | 6 - 11 years       | 13-14 | 6.33E-07 | 5.96E-10 | 3.69E-05 |
| DTXSID0041775 | Chlornitrofen                           | 1836-77-7   | 12 - 19 years      | 13-14 | 3.24E-07 | 2.93E-10 | 1.81E-05 |
| DTXSID0041775 | Chlornitrofen                           | 1836-77-7   | 20 - 65 years      | 13-14 | 3.73E-07 | 4.10E-10 | 1.83E-05 |
| DTXSID0041775 | Chlornitrofen                           | 1836-77-7   | 66 years and older | 13-14 | 3.54E-07 | 4.10E-10 | 1.72E-05 |
| DTXSID0041775 | Chlornitrofen                           | 1836-77-7   | ReproAgeFemale     | 13-14 | 3.74E-07 | 3.20E-10 | 1.79E-05 |
| DTXSID0041775 | Chlornitrofen                           | 1836-77-7   | BMI <= 30          | 13-14 | 4.49E-07 | 4.66E-10 | 2.28E-05 |
| DTXSID0041775 | Chlornitrofen                           | 1836-77-7   | BMI > 30           | 13-14 | 3.31E-07 | 4.20E-10 | 1.41E-05 |
| DTXSID9052686 | 2-Ethylhexyl-2,3,4,5-tetrabromobenzoate | 183658-27-7 | Total              | 13-14 | 1.41E-07 | 2.09E-08 | 4.07E-07 |
| DTXSID9052686 | 2-Ethylhexyl-2,3,4,5-tetrabromobenzoate | 183658-27-7 | Male               | 13-14 | 1.52E-07 | 2.62E-08 | 4.18E-07 |
| DTXSID9052686 | 2-Ethylhexyl-2,3,4,5-tetrabromobenzoate | 183658-27-7 | Female             | 13-14 | 1.28E-07 | 1.31E-08 | 4.08E-07 |
| DTXSID9052686 | 2-Ethylhexyl-2,3,4,5-tetrabromobenzoate | 183658-27-7 | 6 - 11 years       | 13-14 | 2.49E-07 | 7.05E-08 | 5.49E-07 |
| DTXSID9052686 | 2-Ethylhexyl-2,3,4,5-tetrabromobenzoate | 183658-27-7 | 12 - 19 years      | 13-14 | 1.43E-07 | 1.84E-08 | 4.31E-07 |
| DTXSID9052686 | 2-Ethylhexyl-2,3,4,5-tetrabromobenzoate | 183658-27-7 | 20 - 65 years      | 13-14 | 1.41E-07 | 1.99E-08 | 4.17E-07 |
| DTXSID9052686 | 2-Ethylhexyl-2,3,4,5-tetrabromobenzoate | 183658-27-7 | 66 years and older | 13-14 | 1.37E-07 | 1.51E-08 | 3.82E-07 |
| DTXSID9052686 | 2-Ethylhexyl-2,3,4,5-tetrabromobenzoate | 183658-27-7 | ReproAgeFemale     | 13-14 | 1.42E-07 | 1.84E-08 | 4.37E-07 |
| DTXSID9052686 | 2-Ethylhexyl-2,3,4,5-tetrabromobenzoate | 183658-27-7 | BMI <= 30          | 13-14 | 1.34E-07 | 1.71E-08 | 3.94E-07 |
| DTXSID9052686 | 2-Ethylhexyl-2,3,4,5-tetrabromobenzoate | 183658-27-7 | BMI > 30           | 13-14 | 1.72E-07 | 3.17E-08 | 4.57E-07 |
| DTXSID7022174 | EPN                                     | 2104-64-5   | Total              | 13-14 | 3.76E-07 | 2.86E-10 | 1.96E-05 |
| DTXSID7022174 | EPN                                     | 2104-64-5   | Male               | 13-14 | 3.91E-07 | 3.39E-10 | 1.95E-05 |
| DTXSID7022174 | EPN                                     | 2104-64-5   | Female             | 13-14 | 3.93E-07 | 3.95E-10 | 1.88E-05 |
| DTXSID7022174 | EPN                                     | 2104-64-5   | 6 - 11 years       | 13-14 | 7.38E-07 | 5.96E-10 | 3.74E-05 |
| DTXSID7022174 | EPN                                     | 2104-64-5   | 12 - 19 years      | 13-14 | 4.03E-07 | 5.04E-10 | 1.74E-05 |
| DTXSID7022174 | EPN                                     | 2104-64-5   | 20 - 65 years      | 13-14 | 3.90E-07 | 4.35E-10 | 1.86E-05 |
| DTXSID7022174 | EPN                                     | 2104-64-5   | 66 years and older | 13-14 | 3.45E-07 | 3.48E-10 | 1.75E-05 |
| DTXSID7022174 | EPN                                     | 2104-64-5   | ReproAgeFemale     | 13-14 | 4.02E-07 | 2.82E-10 | 1.92E-05 |
| DTXSID7022174 | EPN                                     | 2104-64-5   | BMI <= 30          | 13-14 | 4.11E-07 | 3.30E-10 | 2.23E-05 |
| DTXSID7022174 | EPN                                     | 2104-64-5   | BMI > 30           | 13-14 | 3.25E-07 | 4.49E-10 | 1.48E-05 |
| DTXSID2021070 | 9H-Pyrido[3,4-b]indole (Norharman)      | 244-63-3    | Total              | 13-14 | 6.27E-06 | 6.08E-06 | 6.47E-06 |
| DTXSID2021070 | 9H-Pyrido[3,4-b]indole (Norharman)      | 244-63-3    | Male               | 13-14 | 6.87E-06 | 6.59E-06 | 7.17E-06 |
| DTXSID2021070 | 9H-Pyrido[3,4-b]indole (Norharman)      | 244-63-3    | Female             | 13-14 | 5.74E-06 | 5.41E-06 | 6.09E-06 |
| DTXSID2021070 | 9H-Pyrido[3,4-b]indole (Norharman)      | 244-63-3    | 6 - 11 years       | 13-14 | 9.85E-06 | 9.15E-06 | 1.06E-05 |
| DTXSID2021070 | 9H-Pyrido[3,4-b]indole (Norharman)      | 244-63-3    | 12 - 19 years      | 13-14 | 5.20E-06 | 4.82E-06 | 5.60E-06 |
| DTXSID2021070 | 9H-Pyrido[3,4-b]indole (Norharman)      | 244-63-3    | 20 - 65 years      | 13-14 | 6.24E-06 | 5.92E-06 | 6.59E-06 |
| DTXSID2021070 | 9H-Pyrido[3,4-b]indole (Norharman)      | 244-63-3    | 66 years and older | 13-14 | 5.72E-06 | 5.04E-06 | 6.52E-06 |
| DTXSID2021070 | 9H-Pyrido[3,4-b]indole (Norharman)      | 244-63-3    | ReproAgeFemale     | 13-14 | 5.52E-06 | 5.18E-06 | 5.89E-06 |
| DTXSID2021070 | 9H-Pyrido[3,4-b]indole (Norharman)      | 244-63-3    | BMI <= 30          | 13-14 | 7.09E-06 | 6.84E-06 | 7.35E-06 |
| DTXSID2021070 | 9H-Pyrido[3,4-b]indole (Norharman)      | 244-63-3    | BMI > 30           | 13-14 | 4.74E-06 | 4.47E-06 | 5.03E-06 |
| DTXSID7020001 | 2-Amino-9H-pyrido[2,3-b]indole (A-Î±-C) | 26148-68-5  | Total              | 13-14 | 1.03E-08 | 9.20E-09 | 1.16E-08 |
| DTXSID7020001 | 2-Amino-9H-pyrido[2,3-b]indole (A-Î±-C) | 26148-68-5  | Male               | 13-14 | 1.26E-08 | 1.00E-08 | 1.58E-08 |
| DTXSID7020001 | 2-Amino-9H-pyrido[2,3-b]indole (A-Î±-C) | 26148-68-5  | Female             | 13-14 | 8.47E-09 | 5.32E-09 | 1.34E-08 |
| DTXSID7020001 | 2-Amino-9H-pyrido[2,3-b]indole (A-Î±-C) | 26148-68-5  | 6 - 11 years       | 13-14 | 1.03E-08 | 9.31E-09 | 1.14E-08 |
| DTXSID7020001 | 2-Amino-9H-pyrido[2,3-b]indole (A-Î±-C) | 26148-68-5  | 12 - 19 years      | 13-14 | 7.23E-09 | 5.42E-09 | 9.57E-09 |
| DTXSID7020001 | 2-Amino-9H-pyrido[2,3-b]indole (A-Î±-C) | 26148-68-5  | 20 - 65 years      | 13-14 | 1.55E-08 | 1.13E-08 | 2.14E-08 |
| DTXSID7020001 | 2-Amino-9H-pyrido[2,3-b]indole (A-Î±-C) | 26148-68-5  | 66 years and older | 13-14 | 3.75E-09 | 1.96E-09 | 7.00E-09 |
| DTXSID7020001 | 2-Amino-9H-pyrido[2,3-b]indole (A-Î±-C) | 26148-68-5  | ReproAgeFemale     | 13-14 | 1.34E-08 | 1.05E-08 | 1.72E-08 |
| DTXSID7020001 | 2-Amino-9H-pyrido[2,3-b]indole (A-Î±-C) | 26148-68-5  | BMI <= 30          | 13-14 | 1.19E-08 | 1.03E-08 | 1.38E-08 |
| DTXSID7020001 | 2-Amino-9H-pyrido[2,3-b]indole (A-Î±-C) | 26148-68-5  | BMI > 30           | 13-14 | 7.76E-09 | 6.33E-09 | 9.56E-09 |



|                |                                                   |            |                    |       |          |          |          |
|----------------|---------------------------------------------------|------------|--------------------|-------|----------|----------|----------|
| DTXSID4020458  | Chlorpyrifos                                      | 2921-88-2  | Total              | 13-14 | 1.49E-06 | 8.16E-10 | 2.95E-05 |
| DTXSID4020458  | Chlorpyrifos                                      | 2921-88-2  | Male               | 13-14 | 1.40E-06 | 6.43E-10 | 3.21E-05 |
| DTXSID4020458  | Chlorpyrifos                                      | 2921-88-2  | Female             | 13-14 | 1.44E-06 | 1.02E-09 | 2.82E-05 |
| DTXSID4020458  | Chlorpyrifos                                      | 2921-88-2  | 6 - 11 years       | 13-14 | 2.95E-06 | 1.68E-09 | 6.42E-05 |
| DTXSID4020458  | Chlorpyrifos                                      | 2921-88-2  | 12 - 19 years      | 13-14 | 1.45E-06 | 9.27E-10 | 2.93E-05 |
| DTXSID4020458  | Chlorpyrifos                                      | 2921-88-2  | 20 - 65 years      | 13-14 | 1.51E-06 | 1.19E-09 | 2.85E-05 |
| DTXSID4020458  | Chlorpyrifos                                      | 2921-88-2  | 66 years and older | 13-14 | 1.45E-06 | 9.40E-10 | 2.71E-05 |
| DTXSID4020458  | Chlorpyrifos                                      | 2921-88-2  | ReproAgeFemale     | 13-14 | 1.29E-06 | 5.98E-10 | 2.65E-05 |
| DTXSID4020458  | Chlorpyrifos                                      | 2921-88-2  | BMI <= 30          | 13-14 | 1.78E-06 | 1.16E-09 | 3.32E-05 |
| DTXSID4020458  | Chlorpyrifos                                      | 2921-88-2  | BMI > 30           | 13-14 | 1.20E-06 | 1.25E-09 | 2.32E-05 |
| DTXSID1020855  | Methyl parathion                                  | 298-00-0   | Total              | 13-14 | 3.07E-07 | 2.81E-10 | 1.61E-05 |
| DTXSID1020855  | Methyl parathion                                  | 298-00-0   | Male               | 13-14 | 3.53E-07 | 3.03E-10 | 1.70E-05 |
| DTXSID1020855  | Methyl parathion                                  | 298-00-0   | Female             | 13-14 | 3.40E-07 | 3.12E-10 | 1.54E-05 |
| DTXSID1020855  | Methyl parathion                                  | 298-00-0   | 6 - 11 years       | 13-14 | 5.14E-07 | 4.27E-10 | 3.07E-05 |
| DTXSID1020855  | Methyl parathion                                  | 298-00-0   | 12 - 19 years      | 13-14 | 3.36E-07 | 3.71E-10 | 1.53E-05 |
| DTXSID1020855  | Methyl parathion                                  | 298-00-0   | 20 - 65 years      | 13-14 | 3.04E-07 | 3.26E-10 | 1.53E-05 |
| DTXSID1020855  | Methyl parathion                                  | 298-00-0   | 66 years and older | 13-14 | 3.00E-07 | 2.69E-10 | 1.44E-05 |
| DTXSID1020855  | Methyl parathion                                  | 298-00-0   | ReproAgeFemale     | 13-14 | 3.04E-07 | 3.24E-10 | 1.53E-05 |
| DTXSID1020855  | Methyl parathion                                  | 298-00-0   | BMI <= 30          | 13-14 | 3.73E-07 | 3.57E-10 | 1.88E-05 |
| DTXSID1020855  | Methyl parathion                                  | 298-00-0   | BMI > 30           | 13-14 | 2.86E-07 | 3.84E-10 | 1.20E-05 |
| DTXSID9020407  | Diazinon                                          | 333-41-5   | Total              | 13-14 | 6.16E-07 | 5.26E-07 | 7.24E-07 |
| DTXSID9020407  | Diazinon                                          | 333-41-5   | Male               | 13-14 | 6.16E-07 | 3.79E-07 | 1.01E-06 |
| DTXSID9020407  | Diazinon                                          | 333-41-5   | Female             | 13-14 | 6.31E-07 | 3.84E-07 | 1.06E-06 |
| DTXSID9020407  | Diazinon                                          | 333-41-5   | 6 - 11 years       | 13-14 | 1.43E-06 | 6.73E-07 | 2.29E-06 |
| DTXSID9020407  | Diazinon                                          | 333-41-5   | 12 - 19 years      | 13-14 | 7.00E-07 | 4.54E-07 | 1.10E-06 |
| DTXSID9020407  | Diazinon                                          | 333-41-5   | 20 - 65 years      | 13-14 | 6.58E-07 | 4.10E-07 | 1.05E-06 |
| DTXSID9020407  | Diazinon                                          | 333-41-5   | 66 years and older | 13-14 | 1.53E-06 | 5.41E-07 | 2.40E-06 |
| DTXSID9020407  | Diazinon                                          | 333-41-5   | ReproAgeFemale     | 13-14 | 6.63E-07 | 4.89E-07 | 9.02E-07 |
| DTXSID9020407  | Diazinon                                          | 333-41-5   | BMI <= 30          | 13-14 | 7.15E-07 | 5.92E-07 | 8.70E-07 |
| DTXSID9020407  | Diazinon                                          | 333-41-5   | BMI > 30           | 13-14 | 4.89E-07 | 3.76E-07 | 6.53E-07 |
| DTXSID80197568 | 1-Methyl-9H-pyrido[3,4-b]indole (Harmar 486-84-0) |            | Total              | 13-14 | 2.61E-06 | 2.52E-06 | 2.71E-06 |
| DTXSID80197568 | 1-Methyl-9H-pyrido[3,4-b]indole (Harmar 486-84-0) |            | Male               | 13-14 | 2.67E-06 | 2.47E-06 | 2.89E-06 |
| DTXSID80197568 | 1-Methyl-9H-pyrido[3,4-b]indole (Harmar 486-84-0) |            | Female             | 13-14 | 2.55E-06 | 2.35E-06 | 2.78E-06 |
| DTXSID80197568 | 1-Methyl-9H-pyrido[3,4-b]indole (Harmar 486-84-0) |            | 6 - 11 years       | 13-14 | 3.89E-06 | 3.52E-06 | 4.27E-06 |
| DTXSID80197568 | 1-Methyl-9H-pyrido[3,4-b]indole (Harmar 486-84-0) |            | 12 - 19 years      | 13-14 | 2.23E-06 | 2.01E-06 | 2.49E-06 |
| DTXSID80197568 | 1-Methyl-9H-pyrido[3,4-b]indole (Harmar 486-84-0) |            | 20 - 65 years      | 13-14 | 2.61E-06 | 2.47E-06 | 2.75E-06 |
| DTXSID80197568 | 1-Methyl-9H-pyrido[3,4-b]indole (Harmar 486-84-0) |            | 66 years and older | 13-14 | 2.36E-06 | 2.07E-06 | 2.70E-06 |
| DTXSID80197568 | 1-Methyl-9H-pyrido[3,4-b]indole (Harmar 486-84-0) |            | ReproAgeFemale     | 13-14 | 2.34E-06 | 2.17E-06 | 2.52E-06 |
| DTXSID80197568 | 1-Methyl-9H-pyrido[3,4-b]indole (Harmar 486-84-0) |            | BMI <= 30          | 13-14 | 3.05E-06 | 2.92E-06 | 3.19E-06 |
| DTXSID80197568 | 1-Methyl-9H-pyrido[3,4-b]indole (Harmar 486-84-0) |            | BMI > 30           | 13-14 | 1.83E-06 | 1.71E-06 | 1.97E-06 |
| DTXSID1023998  | Cypermethrin                                      | 52315-07-8 | Total              | 13-14 | 5.13E-07 | 6.80E-10 | 4.00E-06 |
| DTXSID1023998  | Cypermethrin                                      | 52315-07-8 | Male               | 13-14 | 1.29E-06 | 1.45E-09 | 1.27E-05 |
| DTXSID1023998  | Cypermethrin                                      | 52315-07-8 | Female             | 13-14 | 5.55E-07 | 1.16E-09 | 8.19E-06 |
| DTXSID1023998  | Cypermethrin                                      | 52315-07-8 | 6 - 11 years       | 13-14 | 1.54E-06 | 2.23E-09 | 2.39E-05 |
| DTXSID1023998  | Cypermethrin                                      | 52315-07-8 | 12 - 19 years      | 13-14 | 1.30E-06 | 2.06E-09 | 1.26E-05 |
| DTXSID1023998  | Cypermethrin                                      | 52315-07-8 | 20 - 65 years      | 13-14 | 1.24E-06 | 1.44E-09 | 1.28E-05 |
| DTXSID1023998  | Cypermethrin                                      | 52315-07-8 | 66 years and older | 13-14 | 1.08E-06 | 1.17E-09 | 1.23E-05 |

|               |                     |            |                    |       |          |          |          |
|---------------|---------------------|------------|--------------------|-------|----------|----------|----------|
| DTXSID1023998 | Cypermethrin        | 52315-07-8 | ReproAgeFemale     | 13-14 | 6.48E-07 | 1.15E-09 | 5.40E-06 |
| DTXSID1023998 | Cypermethrin        | 52315-07-8 | BMI <= 30          | 13-14 | 6.47E-07 | 1.00E-09 | 4.87E-06 |
| DTXSID1023998 | Cypermethrin        | 52315-07-8 | BMI > 30           | 13-14 | 1.24E-06 | 9.81E-10 | 1.31E-05 |
| DTXSID8022292 | Permethrin          | 52645-53-1 | Total              | 13-14 | 4.91E-07 | 8.33E-10 | 3.79E-06 |
| DTXSID8022292 | Permethrin          | 52645-53-1 | Male               | 13-14 | 1.14E-06 | 1.33E-09 | 1.19E-05 |
| DTXSID8022292 | Permethrin          | 52645-53-1 | Female             | 13-14 | 5.68E-07 | 7.88E-10 | 8.29E-06 |
| DTXSID8022292 | Permethrin          | 52645-53-1 | 6 - 11 years       | 13-14 | 1.49E-06 | 2.51E-09 | 2.19E-05 |
| DTXSID8022292 | Permethrin          | 52645-53-1 | 12 - 19 years      | 13-14 | 1.07E-06 | 1.19E-09 | 1.16E-05 |
| DTXSID8022292 | Permethrin          | 52645-53-1 | 20 - 65 years      | 13-14 | 1.19E-06 | 9.73E-10 | 1.20E-05 |
| DTXSID8022292 | Permethrin          | 52645-53-1 | 66 years and older | 13-14 | 1.27E-06 | 1.27E-09 | 1.18E-05 |
| DTXSID8022292 | Permethrin          | 52645-53-1 | ReproAgeFemale     | 13-14 | 5.94E-07 | 1.03E-09 | 4.96E-06 |
| DTXSID8022292 | Permethrin          | 52645-53-1 | BMI <= 30          | 13-14 | 6.06E-07 | 1.17E-09 | 4.55E-06 |
| DTXSID8022292 | Permethrin          | 52645-53-1 | BMI > 30           | 13-14 | 1.30E-06 | 2.01E-09 | 1.25E-05 |
| DTXSID8020381 | Deltamethrin        | 52918-63-5 | Total              | 13-14 | 2.18E-05 | 2.00E-05 | 2.36E-05 |
| DTXSID8020381 | Deltamethrin        | 52918-63-5 | Male               | 13-14 | 1.34E-05 | 7.27E-06 | 2.21E-05 |
| DTXSID8020381 | Deltamethrin        | 52918-63-5 | Female             | 13-14 | 2.04E-05 | 1.27E-05 | 2.63E-05 |
| DTXSID8020381 | Deltamethrin        | 52918-63-5 | 6 - 11 years       | 13-14 | 1.98E-05 | 4.38E-07 | 4.38E-05 |
| DTXSID8020381 | Deltamethrin        | 52918-63-5 | 12 - 19 years      | 13-14 | 8.36E-06 | 9.94E-07 | 2.02E-05 |
| DTXSID8020381 | Deltamethrin        | 52918-63-5 | 20 - 65 years      | 13-14 | 1.38E-05 | 7.94E-06 | 2.28E-05 |
| DTXSID8020381 | Deltamethrin        | 52918-63-5 | 66 years and older | 13-14 | 9.80E-06 | 4.02E-06 | 1.97E-05 |
| DTXSID8020381 | Deltamethrin        | 52918-63-5 | ReproAgeFemale     | 13-14 | 1.97E-05 | 1.64E-05 | 2.29E-05 |
| DTXSID8020381 | Deltamethrin        | 52918-63-5 | BMI <= 30          | 13-14 | 2.37E-05 | 2.15E-05 | 2.61E-05 |
| DTXSID8020381 | Deltamethrin        | 52918-63-5 | BMI > 30           | 13-14 | 7.76E-06 | 2.87E-06 | 1.68E-05 |
| DTXSID6032352 | Chlorpyrifos-methyl | 5598-13-0  | Total              | 13-14 | 1.31E-06 | 3.88E-10 | 2.71E-05 |
| DTXSID6032352 | Chlorpyrifos-methyl | 5598-13-0  | Male               | 13-14 | 1.44E-06 | 8.58E-10 | 2.96E-05 |
| DTXSID6032352 | Chlorpyrifos-methyl | 5598-13-0  | Female             | 13-14 | 1.21E-06 | 6.67E-10 | 2.58E-05 |
| DTXSID6032352 | Chlorpyrifos-methyl | 5598-13-0  | 6 - 11 years       | 13-14 | 2.60E-06 | 1.24E-09 | 5.96E-05 |
| DTXSID6032352 | Chlorpyrifos-methyl | 5598-13-0  | 12 - 19 years      | 13-14 | 1.29E-06 | 7.46E-10 | 2.67E-05 |
| DTXSID6032352 | Chlorpyrifos-methyl | 5598-13-0  | 20 - 65 years      | 13-14 | 1.38E-06 | 1.05E-09 | 2.60E-05 |
| DTXSID6032352 | Chlorpyrifos-methyl | 5598-13-0  | 66 years and older | 13-14 | 1.15E-06 | 7.02E-10 | 2.48E-05 |
| DTXSID6032352 | Chlorpyrifos-methyl | 5598-13-0  | ReproAgeFemale     | 13-14 | 1.06E-06 | 7.08E-10 | 2.43E-05 |
| DTXSID6032352 | Chlorpyrifos-methyl | 5598-13-0  | BMI <= 30          | 13-14 | 1.38E-06 | 6.70E-10 | 3.05E-05 |
| DTXSID6032352 | Chlorpyrifos-methyl | 5598-13-0  | BMI > 30           | 13-14 | 1.02E-06 | 8.38E-10 | 2.11E-05 |
| DTXSID6037512 | Fospirate           | 5598-52-7  | Total              | 13-14 | 1.31E-06 | 7.05E-10 | 2.58E-05 |
| DTXSID6037512 | Fospirate           | 5598-52-7  | Male               | 13-14 | 1.65E-06 | 1.69E-09 | 2.82E-05 |
| DTXSID6037512 | Fospirate           | 5598-52-7  | Female             | 13-14 | 1.18E-06 | 5.55E-10 | 2.45E-05 |
| DTXSID6037512 | Fospirate           | 5598-52-7  | 6 - 11 years       | 13-14 | 2.32E-06 | 7.67E-10 | 5.63E-05 |
| DTXSID6037512 | Fospirate           | 5598-52-7  | 12 - 19 years      | 13-14 | 1.31E-06 | 8.29E-10 | 2.55E-05 |
| DTXSID6037512 | Fospirate           | 5598-52-7  | 20 - 65 years      | 13-14 | 1.29E-06 | 7.74E-10 | 2.47E-05 |
| DTXSID6037512 | Fospirate           | 5598-52-7  | 66 years and older | 13-14 | 1.14E-06 | 8.21E-10 | 2.35E-05 |
| DTXSID6037512 | Fospirate           | 5598-52-7  | ReproAgeFemale     | 13-14 | 1.29E-06 | 6.66E-10 | 2.33E-05 |
| DTXSID6037512 | Fospirate           | 5598-52-7  | BMI <= 30          | 13-14 | 1.40E-06 | 8.77E-10 | 2.90E-05 |
| DTXSID6037512 | Fospirate           | 5598-52-7  | BMI > 30           | 13-14 | 1.18E-06 | 8.25E-10 | 2.02E-05 |
| DTXSID7021100 | Parathion           | 56-38-2    | Total              | 13-14 | 3.44E-07 | 3.41E-10 | 1.73E-05 |
| DTXSID7021100 | Parathion           | 56-38-2    | Male               | 13-14 | 4.22E-07 | 4.36E-10 | 1.77E-05 |
| DTXSID7021100 | Parathion           | 56-38-2    | Female             | 13-14 | 3.11E-07 | 2.18E-10 | 1.72E-05 |
| DTXSID7021100 | Parathion           | 56-38-2    | 6 - 11 years       | 13-14 | 6.42E-07 | 6.40E-10 | 3.32E-05 |

|               |                                                      |                    |                    |          |          |          |          |
|---------------|------------------------------------------------------|--------------------|--------------------|----------|----------|----------|----------|
| DTXSID7021100 | Parathion                                            | 56-38-2            | 12 - 19 years      | 13-14    | 3.78E-07 | 3.60E-10 | 1.62E-05 |
| DTXSID7021100 | Parathion                                            | 56-38-2            | 20 - 65 years      | 13-14    | 3.40E-07 | 3.67E-10 | 1.71E-05 |
| DTXSID7021100 | Parathion                                            | 56-38-2            | 66 years and older | 13-14    | 3.61E-07 | 4.60E-10 | 1.61E-05 |
| DTXSID7021100 | Parathion                                            | 56-38-2            | ReproAgeFemale     | 13-14    | 3.46E-07 | 3.47E-10 | 1.69E-05 |
| DTXSID7021100 | Parathion                                            | 56-38-2            | BMI <= 30          | 13-14    | 4.01E-07 | 3.05E-10 | 2.00E-05 |
| DTXSID7021100 | Parathion                                            | 56-38-2            | BMI > 30           | 13-14    | 2.49E-07 | 2.16E-10 | 1.32E-05 |
| DTXSID0043767 | 3-Amino-1,4-dimethyl-5H-pyrido[4,3-b]in 62450-06-0   | Total              | 13-14              | 1.14E-09 | 1.07E-10 | 3.64E-09 |          |
| DTXSID0043767 | 3-Amino-1,4-dimethyl-5H-pyrido[4,3-b]in 62450-06-0   | Male               | 13-14              | 1.27E-09 | 1.28E-10 | 3.84E-09 |          |
| DTXSID0043767 | 3-Amino-1,4-dimethyl-5H-pyrido[4,3-b]in 62450-06-0   | Female             | 13-14              | 1.15E-09 | 8.16E-11 | 3.82E-09 |          |
| DTXSID0043767 | 3-Amino-1,4-dimethyl-5H-pyrido[4,3-b]in 62450-06-0   | 6 - 11 years       | 13-14              | 1.28E-09 | 1.43E-10 | 4.02E-09 |          |
| DTXSID0043767 | 3-Amino-1,4-dimethyl-5H-pyrido[4,3-b]in 62450-06-0   | 12 - 19 years      | 13-14              | 1.71E-09 | 2.28E-10 | 4.80E-09 |          |
| DTXSID0043767 | 3-Amino-1,4-dimethyl-5H-pyrido[4,3-b]in 62450-06-0   | 20 - 65 years      | 13-14              | 1.36E-09 | 1.30E-10 | 4.18E-09 |          |
| DTXSID0043767 | 3-Amino-1,4-dimethyl-5H-pyrido[4,3-b]in 62450-06-0   | 66 years and older | 13-14              | 9.87E-10 | 8.01E-11 | 3.11E-09 |          |
| DTXSID0043767 | 3-Amino-1,4-dimethyl-5H-pyrido[4,3-b]in 62450-06-0   | ReproAgeFemale     | 13-14              | 1.41E-09 | 1.16E-10 | 4.28E-09 |          |
| DTXSID0043767 | 3-Amino-1,4-dimethyl-5H-pyrido[4,3-b]in 62450-06-0   | BMI <= 30          | 13-14              | 1.26E-09 | 1.06E-10 | 3.98E-09 |          |
| DTXSID0043767 | 3-Amino-1,4-dimethyl-5H-pyrido[4,3-b]in 62450-06-0   | BMI > 30           | 13-14              | 1.32E-09 | 1.22E-10 | 4.07E-09 |          |
| DTXSID5043768 | 1-Methyl-3-amino-5H-pyrido[4,3-b]indole 62450-07-1   | Total              | 13-14              | 1.10E-09 | 1.12E-10 | 3.21E-09 |          |
| DTXSID5043768 | 1-Methyl-3-amino-5H-pyrido[4,3-b]indole 62450-07-1   | Male               | 13-14              | 1.13E-09 | 1.38E-10 | 3.40E-09 |          |
| DTXSID5043768 | 1-Methyl-3-amino-5H-pyrido[4,3-b]indole 62450-07-1   | Female             | 13-14              | 1.00E-09 | 6.61E-11 | 3.18E-09 |          |
| DTXSID5043768 | 1-Methyl-3-amino-5H-pyrido[4,3-b]indole 62450-07-1   | 6 - 11 years       | 13-14              | 7.28E-10 | 6.79E-11 | 2.68E-09 |          |
| DTXSID5043768 | 1-Methyl-3-amino-5H-pyrido[4,3-b]indole 62450-07-1   | 12 - 19 years      | 13-14              | 1.59E-09 | 2.49E-10 | 4.25E-09 |          |
| DTXSID5043768 | 1-Methyl-3-amino-5H-pyrido[4,3-b]indole 62450-07-1   | 20 - 65 years      | 13-14              | 1.22E-09 | 1.28E-10 | 3.55E-09 |          |
| DTXSID5043768 | 1-Methyl-3-amino-5H-pyrido[4,3-b]indole 62450-07-1   | 66 years and older | 13-14              | 8.93E-10 | 8.12E-11 | 2.80E-09 |          |
| DTXSID5043768 | 1-Methyl-3-amino-5H-pyrido[4,3-b]indole 62450-07-1   | ReproAgeFemale     | 13-14              | 1.25E-09 | 1.29E-10 | 3.79E-09 |          |
| DTXSID5043768 | 1-Methyl-3-amino-5H-pyrido[4,3-b]indole 62450-07-1   | BMI <= 30          | 13-14              | 1.12E-09 | 1.08E-10 | 3.32E-09 |          |
| DTXSID5043768 | 1-Methyl-3-amino-5H-pyrido[4,3-b]indole 62450-07-1   | BMI > 30           | 13-14              | 1.11E-09 | 1.14E-10 | 3.38E-09 |          |
| DTXSID0020658 | 2-Aminodipyrido[1,2-a:3',2'-d]imidazole 67730-10-3   | Total              | 13-14              | 7.39E-10 | 3.81E-11 | 2.89E-09 |          |
| DTXSID0020658 | 2-Aminodipyrido[1,2-a:3',2'-d]imidazole 67730-10-3   | Male               | 13-14              | 5.47E-10 | 2.79E-11 | 2.30E-09 |          |
| DTXSID0020658 | 2-Aminodipyrido[1,2-a:3',2'-d]imidazole 67730-10-3   | Female             | 13-14              | 8.48E-10 | 3.83E-11 | 3.25E-09 |          |
| DTXSID0020658 | 2-Aminodipyrido[1,2-a:3',2'-d]imidazole 67730-10-3   | 6 - 11 years       | 13-14              | 1.18E-09 | 1.26E-10 | 4.09E-09 |          |
| DTXSID0020658 | 2-Aminodipyrido[1,2-a:3',2'-d]imidazole 67730-10-3   | 12 - 19 years      | 13-14              | 1.92E-10 | 2.61E-12 | 2.31E-09 |          |
| DTXSID0020658 | 2-Aminodipyrido[1,2-a:3',2'-d]imidazole 67730-10-3   | 20 - 65 years      | 13-14              | 8.70E-10 | 4.78E-11 | 3.20E-09 |          |
| DTXSID0020658 | 2-Aminodipyrido[1,2-a:3',2'-d]imidazole 67730-10-3   | 66 years and older | 13-14              | 8.54E-10 | 7.27E-11 | 2.99E-09 |          |
| DTXSID0020658 | 2-Aminodipyrido[1,2-a:3',2'-d]imidazole 67730-10-3   | ReproAgeFemale     | 13-14              | 9.32E-10 | 4.57E-11 | 3.43E-09 |          |
| DTXSID0020658 | 2-Aminodipyrido[1,2-a:3',2'-d]imidazole 67730-10-3   | BMI <= 30          | 13-14              | 7.26E-10 | 3.66E-11 | 2.93E-09 |          |
| DTXSID0020658 | 2-Aminodipyrido[1,2-a:3',2'-d]imidazole 67730-10-3   | BMI > 30           | 13-14              | 8.88E-10 | 5.00E-11 | 3.15E-09 |          |
| DTXSID5020657 | 2-Amino-6-methyldipyrido[1,2-a:3',2'-d]ir 67730-11-4 | Total              | 13-14              | 5.53E-10 | 5.34E-11 | 1.61E-09 |          |
| DTXSID5020657 | 2-Amino-6-methyldipyrido[1,2-a:3',2'-d]ir 67730-11-4 | Male               | 13-14              | 5.73E-10 | 6.63E-11 | 1.63E-09 |          |
| DTXSID5020657 | 2-Amino-6-methyldipyrido[1,2-a:3',2'-d]ir 67730-11-4 | Female             | 13-14              | 5.47E-10 | 4.29E-11 | 1.61E-09 |          |
| DTXSID5020657 | 2-Amino-6-methyldipyrido[1,2-a:3',2'-d]ir 67730-11-4 | 6 - 11 years       | 13-14              | 7.84E-10 | 1.36E-10 | 2.06E-09 |          |
| DTXSID5020657 | 2-Amino-6-methyldipyrido[1,2-a:3',2'-d]ir 67730-11-4 | 12 - 19 years      | 13-14              | 7.03E-10 | 8.81E-11 | 1.96E-09 |          |
| DTXSID5020657 | 2-Amino-6-methyldipyrido[1,2-a:3',2'-d]ir 67730-11-4 | 20 - 65 years      | 13-14              | 5.84E-10 | 5.39E-11 | 1.70E-09 |          |
| DTXSID5020657 | 2-Amino-6-methyldipyrido[1,2-a:3',2'-d]ir 67730-11-4 | 66 years and older | 13-14              | 4.59E-10 | 4.76E-11 | 1.41E-09 |          |
| DTXSID5020657 | 2-Amino-6-methyldipyrido[1,2-a:3',2'-d]ir 67730-11-4 | ReproAgeFemale     | 13-14              | 6.06E-10 | 5.80E-11 | 1.80E-09 |          |
| DTXSID5020657 | 2-Amino-6-methyldipyrido[1,2-a:3',2'-d]ir 67730-11-4 | BMI <= 30          | 13-14              | 5.55E-10 | 5.94E-11 | 1.64E-09 |          |
| DTXSID5020657 | 2-Amino-6-methyldipyrido[1,2-a:3',2'-d]ir 67730-11-4 | BMI > 30           | 13-14              | 5.78E-10 | 5.25E-11 | 1.64E-09 |          |
| DTXSID5043766 | 2-Amino-3-methyl-9H-pyrido[2,3-b]indo 68006-83-7     | Total              | 13-14              | 1.59E-09 | 4.81E-10 | 3.06E-09 |          |

|               |                                                   |                    |                    |          |          |          |
|---------------|---------------------------------------------------|--------------------|--------------------|----------|----------|----------|
| DTXSID5043766 | 2-Amino-3-methyl-9H-pyrido[2,3-b]indo 68006-83-7  | Male               | 13-14              | 1.90E-09 | 7.03E-10 | 3.38E-09 |
| DTXSID5043766 | 2-Amino-3-methyl-9H-pyrido[2,3-b]indo 68006-83-7  | Female             | 13-14              | 1.35E-09 | 2.95E-10 | 2.87E-09 |
| DTXSID5043766 | 2-Amino-3-methyl-9H-pyrido[2,3-b]indo 68006-83-7  | 6 - 11 years       | 13-14              | 7.98E-10 | 1.35E-10 | 2.08E-09 |
| DTXSID5043766 | 2-Amino-3-methyl-9H-pyrido[2,3-b]indo 68006-83-7  | 12 - 19 years      | 13-14              | 1.34E-09 | 2.75E-10 | 2.91E-09 |
| DTXSID5043766 | 2-Amino-3-methyl-9H-pyrido[2,3-b]indo 68006-83-7  | 20 - 65 years      | 13-14              | 2.21E-09 | 8.62E-10 | 3.67E-09 |
| DTXSID5043766 | 2-Amino-3-methyl-9H-pyrido[2,3-b]indo 68006-83-7  | 66 years and older | 13-14              | 1.38E-09 | 2.89E-10 | 2.75E-09 |
| DTXSID5043766 | 2-Amino-3-methyl-9H-pyrido[2,3-b]indo 68006-83-7  | ReproAgeFemale     | 13-14              | 1.80E-09 | 5.35E-10 | 3.41E-09 |
| DTXSID5043766 | 2-Amino-3-methyl-9H-pyrido[2,3-b]indo 68006-83-7  | BMI <= 30          | 13-14              | 1.63E-09 | 5.08E-10 | 3.22E-09 |
| DTXSID5043766 | 2-Amino-3-methyl-9H-pyrido[2,3-b]indo 68006-83-7  | BMI > 30           | 13-14              | 1.64E-09 | 5.06E-10 | 3.24E-09 |
| DTXSID5035957 | Cyfluthrin                                        | 68359-37-5         | Total              | 6.07E-07 | 1.41E-07 | 1.40E-06 |
| DTXSID5035957 | Cyfluthrin                                        | 68359-37-5         | Male               | 6.45E-07 | 1.80E-07 | 1.44E-06 |
| DTXSID5035957 | Cyfluthrin                                        | 68359-37-5         | Female             | 5.32E-07 | 9.36E-08 | 1.38E-06 |
| DTXSID5035957 | Cyfluthrin                                        | 68359-37-5         | 6 - 11 years       | 9.37E-07 | 3.47E-07 | 1.76E-06 |
| DTXSID5035957 | Cyfluthrin                                        | 68359-37-5         | 12 - 19 years      | 6.13E-07 | 1.21E-07 | 1.45E-06 |
| DTXSID5035957 | Cyfluthrin                                        | 68359-37-5         | 20 - 65 years      | 5.55E-07 | 1.10E-07 | 1.40E-06 |
| DTXSID5035957 | Cyfluthrin                                        | 68359-37-5         | 66 years and older | 6.89E-07 | 1.12E-07 | 1.51E-06 |
| DTXSID5035957 | Cyfluthrin                                        | 68359-37-5         | ReproAgeFemale     | 5.00E-07 | 8.02E-08 | 1.35E-06 |
| DTXSID5035957 | Cyfluthrin                                        | 68359-37-5         | BMI <= 30          | 5.94E-07 | 1.30E-07 | 1.43E-06 |
| DTXSID5035957 | Cyfluthrin                                        | 68359-37-5         | BMI > 30           | 6.03E-07 | 1.46E-07 | 1.48E-06 |
| DTXSID6023947 | Carbon disulfide                                  | 75-15-0            | Total              | 4.55E-05 | 4.12E-05 | 5.01E-05 |
| DTXSID6023947 | Carbon disulfide                                  | 75-15-0            | Male               | 5.02E-05 | 4.34E-05 | 5.83E-05 |
| DTXSID6023947 | Carbon disulfide                                  | 75-15-0            | Female             | 4.12E-05 | 3.42E-05 | 4.97E-05 |
| DTXSID6023947 | Carbon disulfide                                  | 75-15-0            | 6 - 11 years       | 5.23E-05 | 3.70E-05 | 7.43E-05 |
| DTXSID6023947 | Carbon disulfide                                  | 75-15-0            | 12 - 19 years      | 3.15E-05 | 2.37E-05 | 4.22E-05 |
| DTXSID6023947 | Carbon disulfide                                  | 75-15-0            | 20 - 65 years      | 4.86E-05 | 4.11E-05 | 5.77E-05 |
| DTXSID6023947 | Carbon disulfide                                  | 75-15-0            | 66 years and older | 4.41E-05 | 2.94E-05 | 6.68E-05 |
| DTXSID6023947 | Carbon disulfide                                  | 75-15-0            | ReproAgeFemale     | 3.97E-05 | 3.24E-05 | 4.92E-05 |
| DTXSID6023947 | Carbon disulfide                                  | 75-15-0            | BMI <= 30          | 4.96E-05 | 4.41E-05 | 5.59E-05 |
| DTXSID6023947 | Carbon disulfide                                  | 75-15-0            | BMI > 30           | 3.93E-05 | 3.33E-05 | 4.66E-05 |
| DTXSID4020745 | 2-Amino-3-methyl-3H-imidazo[4,5-f]quin 76180-96-6 | Total              | 13-14              | 6.29E-10 | 5.96E-11 | 1.84E-09 |
| DTXSID4020745 | 2-Amino-3-methyl-3H-imidazo[4,5-f]quin 76180-96-6 | Male               | 13-14              | 6.93E-10 | 8.80E-11 | 1.94E-09 |
| DTXSID4020745 | 2-Amino-3-methyl-3H-imidazo[4,5-f]quin 76180-96-6 | Female             | 13-14              | 6.06E-10 | 4.61E-11 | 1.84E-09 |
| DTXSID4020745 | 2-Amino-3-methyl-3H-imidazo[4,5-f]quin 76180-96-6 | 6 - 11 years       | 13-14              | 7.95E-10 | 1.25E-10 | 2.19E-09 |
| DTXSID4020745 | 2-Amino-3-methyl-3H-imidazo[4,5-f]quin 76180-96-6 | 12 - 19 years      | 13-14              | 7.63E-10 | 9.20E-11 | 2.16E-09 |
| DTXSID4020745 | 2-Amino-3-methyl-3H-imidazo[4,5-f]quin 76180-96-6 | 20 - 65 years      | 13-14              | 6.61E-10 | 6.70E-11 | 1.98E-09 |
| DTXSID4020745 | 2-Amino-3-methyl-3H-imidazo[4,5-f]quin 76180-96-6 | 66 years and older | 13-14              | 7.54E-10 | 9.95E-11 | 1.97E-09 |
| DTXSID4020745 | 2-Amino-3-methyl-3H-imidazo[4,5-f]quin 76180-96-6 | ReproAgeFemale     | 13-14              | 7.18E-10 | 6.77E-11 | 2.15E-09 |
| DTXSID4020745 | 2-Amino-3-methyl-3H-imidazo[4,5-f]quin 76180-96-6 | BMI <= 30          | 13-14              | 6.25E-10 | 5.82E-11 | 1.85E-09 |
| DTXSID4020745 | 2-Amino-3-methyl-3H-imidazo[4,5-f]quin 76180-96-6 | BMI > 30           | 13-14              | 7.63E-10 | 8.68E-11 | 2.12E-09 |
| DTXSID5052676 | Tri-p-cresylphosphate (TpCP)                      | 78-32-0            | Total              | 2.84E-07 | 7.57E-08 | 6.07E-07 |
| DTXSID5052676 | Tri-p-cresylphosphate (TpCP)                      | 78-32-0            | Male               | 2.95E-07 | 8.96E-08 | 6.21E-07 |
| DTXSID5052676 | Tri-p-cresylphosphate (TpCP)                      | 78-32-0            | Female             | 2.68E-07 | 5.73E-08 | 6.11E-07 |
| DTXSID5052676 | Tri-p-cresylphosphate (TpCP)                      | 78-32-0            | 6 - 11 years       | 6.15E-07 | 4.32E-07 | 8.68E-07 |
| DTXSID5052676 | Tri-p-cresylphosphate (TpCP)                      | 78-32-0            | 12 - 19 years      | 3.85E-07 | 1.20E-07 | 7.31E-07 |
| DTXSID5052676 | Tri-p-cresylphosphate (TpCP)                      | 78-32-0            | 20 - 65 years      | 2.47E-07 | 5.19E-08 | 5.71E-07 |
| DTXSID5052676 | Tri-p-cresylphosphate (TpCP)                      | 78-32-0            | 66 years and older | 2.29E-07 | 3.36E-08 | 5.36E-07 |
| DTXSID5052676 | Tri-p-cresylphosphate (TpCP)                      | 78-32-0            | ReproAgeFemale     | 2.78E-07 | 6.12E-08 | 6.35E-07 |

|               |                              |            |                    |       |          |          |          |
|---------------|------------------------------|------------|--------------------|-------|----------|----------|----------|
| DTXSID5052676 | Tri-p-cresylphosphate (TpCP) | 78-32-0    | BMI <= 30          | 13-14 | 3.06E-07 | 8.89E-08 | 6.39E-07 |
| DTXSID5052676 | Tri-p-cresylphosphate (TpCP) | 78-32-0    | BMI > 30           | 13-14 | 2.45E-07 | 5.56E-08 | 5.75E-07 |
| DTXSID3020964 | Nitrobenzene                 | 98-95-3    | Total              | 13-14 | 1.53E-07 | 1.50E-10 | 7.63E-06 |
| DTXSID3020964 | Nitrobenzene                 | 98-95-3    | Male               | 13-14 | 1.59E-07 | 1.34E-10 | 7.54E-06 |
| DTXSID3020964 | Nitrobenzene                 | 98-95-3    | Female             | 13-14 | 1.41E-07 | 1.12E-10 | 7.23E-06 |
| DTXSID3020964 | Nitrobenzene                 | 98-95-3    | 6 - 11 years       | 13-14 | 2.77E-07 | 3.21E-10 | 1.50E-05 |
| DTXSID3020964 | Nitrobenzene                 | 98-95-3    | 12 - 19 years      | 13-14 | 1.41E-07 | 1.19E-10 | 7.08E-06 |
| DTXSID3020964 | Nitrobenzene                 | 98-95-3    | 20 - 65 years      | 13-14 | 1.53E-07 | 1.03E-10 | 7.22E-06 |
| DTXSID3020964 | Nitrobenzene                 | 98-95-3    | 66 years and older | 13-14 | 1.47E-07 | 1.83E-10 | 6.65E-06 |
| DTXSID3020964 | Nitrobenzene                 | 98-95-3    | ReproAgeFemale     | 13-14 | 1.58E-07 | 1.61E-10 | 7.13E-06 |
| DTXSID3020964 | Nitrobenzene                 | 98-95-3    | BMI <= 30          | 13-14 | 1.64E-07 | 1.46E-10 | 8.49E-06 |
| DTXSID3020964 | Nitrobenzene                 | 98-95-3    | BMI > 30           | 13-14 | 1.18E-07 | 1.10E-10 | 5.46E-06 |
| DTXSID4020791 | Malathion                    | 121-75-5   | Total              | 11-12 | 9.35E-07 | 3.46E-09 | 3.76E-05 |
| DTXSID4020791 | Malathion                    | 121-75-5   | Male               | 11-12 | 9.79E-07 | 4.25E-09 | 4.02E-05 |
| DTXSID4020791 | Malathion                    | 121-75-5   | Female             | 11-12 | 9.47E-07 | 2.91E-09 | 4.10E-05 |
| DTXSID4020791 | Malathion                    | 121-75-5   | 6 - 11 years       | 11-12 | 1.65E-06 | 4.90E-09 | 7.04E-05 |
| DTXSID4020791 | Malathion                    | 121-75-5   | 12 - 19 years      | 11-12 | 8.26E-07 | 3.30E-09 | 3.36E-05 |
| DTXSID4020791 | Malathion                    | 121-75-5   | 20 - 65 years      | 11-12 | 9.01E-07 | 2.96E-09 | 3.58E-05 |
| DTXSID4020791 | Malathion                    | 121-75-5   | 66 years and older | 11-12 | 1.01E-06 | 4.25E-09 | 3.99E-05 |
| DTXSID4020791 | Malathion                    | 121-75-5   | ReproAgeFemale     | 11-12 | 8.28E-07 | 3.00E-09 | 3.71E-05 |
| DTXSID4020791 | Malathion                    | 121-75-5   | BMI <= 30          | 11-12 | 1.12E-06 | 4.08E-09 | 4.73E-05 |
| DTXSID4020791 | Malathion                    | 121-75-5   | BMI > 30           | 11-12 | 6.52E-07 | 3.26E-09 | 2.50E-05 |
| DTXSID4032613 | Fenitrothion                 | 122-14-5   | Total              | 11-12 | 1.72E-06 | 5.05E-09 | 6.20E-05 |
| DTXSID4032613 | Fenitrothion                 | 122-14-5   | Male               | 11-12 | 1.60E-06 | 4.02E-09 | 6.10E-05 |
| DTXSID4032613 | Fenitrothion                 | 122-14-5   | Female             | 11-12 | 1.61E-06 | 4.21E-09 | 5.68E-05 |
| DTXSID4032613 | Fenitrothion                 | 122-14-5   | 6 - 11 years       | 11-12 | 2.97E-06 | 5.24E-09 | 1.23E-04 |
| DTXSID4032613 | Fenitrothion                 | 122-14-5   | 12 - 19 years      | 11-12 | 1.48E-06 | 3.43E-09 | 5.15E-05 |
| DTXSID4032613 | Fenitrothion                 | 122-14-5   | 20 - 65 years      | 11-12 | 1.51E-06 | 4.73E-09 | 5.49E-05 |
| DTXSID4032613 | Fenitrothion                 | 122-14-5   | 66 years and older | 11-12 | 1.87E-06 | 4.81E-09 | 6.91E-05 |
| DTXSID4032613 | Fenitrothion                 | 122-14-5   | ReproAgeFemale     | 11-12 | 1.66E-06 | 3.53E-09 | 6.05E-05 |
| DTXSID4032613 | Fenitrothion                 | 122-14-5   | BMI <= 30          | 11-12 | 1.83E-06 | 5.14E-09 | 7.20E-05 |
| DTXSID4032613 | Fenitrothion                 | 122-14-5   | BMI > 30           | 11-12 | 1.13E-06 | 2.96E-09 | 3.74E-05 |
| DTXSID2022254 | Terbufos                     | 13071-79-9 | Total              | 11-12 | 1.68E-07 | 1.13E-09 | 8.09E-06 |
| DTXSID2022254 | Terbufos                     | 13071-79-9 | Male               | 11-12 | 1.79E-07 | 1.30E-09 | 8.76E-06 |
| DTXSID2022254 | Terbufos                     | 13071-79-9 | Female             | 11-12 | 1.54E-07 | 1.00E-09 | 8.58E-06 |
| DTXSID2022254 | Terbufos                     | 13071-79-9 | 6 - 11 years       | 11-12 | 2.09E-07 | 1.88E-09 | 1.00E-05 |
| DTXSID2022254 | Terbufos                     | 13071-79-9 | 12 - 19 years      | 11-12 | 2.16E-07 | 1.50E-09 | 9.11E-06 |
| DTXSID2022254 | Terbufos                     | 13071-79-9 | 20 - 65 years      | 11-12 | 1.66E-07 | 1.07E-09 | 7.94E-06 |
| DTXSID2022254 | Terbufos                     | 13071-79-9 | 66 years and older | 11-12 | 1.57E-07 | 1.24E-09 | 9.22E-06 |
| DTXSID2022254 | Terbufos                     | 13071-79-9 | ReproAgeFemale     | 11-12 | 1.78E-07 | 1.30E-09 | 7.74E-06 |
| DTXSID2022254 | Terbufos                     | 13071-79-9 | BMI <= 30          | 11-12 | 1.65E-07 | 1.39E-09 | 7.15E-06 |
| DTXSID2022254 | Terbufos                     | 13071-79-9 | BMI > 30           | 11-12 | 1.52E-07 | 8.91E-10 | 7.50E-06 |
| DTXSID3022455 | Dimethyl phthalate           | 131-11-3   | Total              | 11-12 | 1.60E-05 | 1.49E-05 | 1.72E-05 |
| DTXSID3022455 | Dimethyl phthalate           | 131-11-3   | Male               | 11-12 | 1.82E-05 | 1.50E-05 | 2.19E-05 |
| DTXSID3022455 | Dimethyl phthalate           | 131-11-3   | Female             | 11-12 | 1.40E-05 | 1.20E-05 | 1.64E-05 |
| DTXSID3022455 | Dimethyl phthalate           | 131-11-3   | 6 - 11 years       | 11-12 | 5.45E-05 | 4.17E-05 | 7.14E-05 |
| DTXSID3022455 | Dimethyl phthalate           | 131-11-3   | 12 - 19 years      | 11-12 | 2.01E-05 | 1.65E-05 | 2.44E-05 |

|               |                    |            |                    |       |          |          |          |
|---------------|--------------------|------------|--------------------|-------|----------|----------|----------|
| DTXSID3022455 | Dimethyl phthalate | 131-11-3   | 20 - 65 years      | 11-12 | 1.51E-05 | 1.29E-05 | 1.76E-05 |
| DTXSID3022455 | Dimethyl phthalate | 131-11-3   | 66 years and older | 11-12 | 8.79E-06 | 6.80E-06 | 1.15E-05 |
| DTXSID3022455 | Dimethyl phthalate | 131-11-3   | ReproAgeFemale     | 11-12 | 1.55E-05 | 1.34E-05 | 1.82E-05 |
| DTXSID3022455 | Dimethyl phthalate | 131-11-3   | BMI <= 30          | 11-12 | 1.79E-05 | 1.65E-05 | 1.96E-05 |
| DTXSID3022455 | Dimethyl phthalate | 131-11-3   | BMI > 30           | 11-12 | 1.23E-05 | 1.08E-05 | 1.39E-05 |
| DTXSID9023914 | Dicrotophos        | 141-66-2   | Total              | 11-12 | 9.99E-07 | 3.05E-09 | 3.60E-05 |
| DTXSID9023914 | Dicrotophos        | 141-66-2   | Male               | 11-12 | 1.11E-06 | 3.11E-09 | 3.98E-05 |
| DTXSID9023914 | Dicrotophos        | 141-66-2   | Female             | 11-12 | 9.93E-07 | 2.93E-09 | 3.65E-05 |
| DTXSID9023914 | Dicrotophos        | 141-66-2   | 6 - 11 years       | 11-12 | 1.81E-06 | 3.96E-09 | 7.61E-05 |
| DTXSID9023914 | Dicrotophos        | 141-66-2   | 12 - 19 years      | 11-12 | 1.07E-06 | 3.87E-09 | 3.84E-05 |
| DTXSID9023914 | Dicrotophos        | 141-66-2   | 20 - 65 years      | 11-12 | 9.70E-07 | 3.00E-09 | 3.66E-05 |
| DTXSID9023914 | Dicrotophos        | 141-66-2   | 66 years and older | 11-12 | 8.81E-07 | 3.23E-09 | 3.27E-05 |
| DTXSID9023914 | Dicrotophos        | 141-66-2   | ReproAgeFemale     | 11-12 | 9.58E-07 | 2.42E-09 | 3.79E-05 |
| DTXSID9023914 | Dicrotophos        | 141-66-2   | BMI <= 30          | 11-12 | 1.16E-06 | 3.52E-09 | 4.34E-05 |
| DTXSID9023914 | Dicrotophos        | 141-66-2   | BMI > 30           | 11-12 | 7.37E-07 | 2.10E-09 | 2.51E-05 |
| DTXSID1032648 | Tetrachlorvinphos  | 22248-79-9 | Total              | 11-12 | 1.53E-06 | 5.09E-09 | 5.78E-05 |
| DTXSID1032648 | Tetrachlorvinphos  | 22248-79-9 | Male               | 11-12 | 1.56E-06 | 4.37E-09 | 5.97E-05 |
| DTXSID1032648 | Tetrachlorvinphos  | 22248-79-9 | Female             | 11-12 | 1.49E-06 | 3.94E-09 | 5.65E-05 |
| DTXSID1032648 | Tetrachlorvinphos  | 22248-79-9 | 6 - 11 years       | 11-12 | 3.02E-06 | 8.40E-09 | 1.22E-04 |
| DTXSID1032648 | Tetrachlorvinphos  | 22248-79-9 | 12 - 19 years      | 11-12 | 1.76E-06 | 5.29E-09 | 5.60E-05 |
| DTXSID1032648 | Tetrachlorvinphos  | 22248-79-9 | 20 - 65 years      | 11-12 | 1.44E-06 | 4.21E-09 | 5.41E-05 |
| DTXSID1032648 | Tetrachlorvinphos  | 22248-79-9 | 66 years and older | 11-12 | 1.33E-06 | 3.76E-09 | 4.91E-05 |
| DTXSID1032648 | Tetrachlorvinphos  | 22248-79-9 | ReproAgeFemale     | 11-12 | 1.47E-06 | 3.27E-09 | 6.11E-05 |
| DTXSID1032648 | Tetrachlorvinphos  | 22248-79-9 | BMI <= 30          | 11-12 | 1.73E-06 | 4.22E-09 | 6.56E-05 |
| DTXSID1032648 | Tetrachlorvinphos  | 22248-79-9 | BMI > 30           | 11-12 | 1.14E-06 | 2.87E-09 | 4.10E-05 |
| DTXSID0024266 | Pirimiphos-methyl  | 29232-93-7 | Total              | 11-12 | 1.94E-06 | 4.95E-09 | 6.64E-05 |
| DTXSID0024266 | Pirimiphos-methyl  | 29232-93-7 | Male               | 11-12 | 1.98E-06 | 5.11E-09 | 7.08E-05 |
| DTXSID0024266 | Pirimiphos-methyl  | 29232-93-7 | Female             | 11-12 | 1.79E-06 | 3.94E-09 | 6.73E-05 |
| DTXSID0024266 | Pirimiphos-methyl  | 29232-93-7 | 6 - 11 years       | 11-12 | 3.02E-06 | 7.63E-09 | 1.23E-04 |
| DTXSID0024266 | Pirimiphos-methyl  | 29232-93-7 | 12 - 19 years      | 11-12 | 1.73E-06 | 4.36E-09 | 5.95E-05 |
| DTXSID0024266 | Pirimiphos-methyl  | 29232-93-7 | 20 - 65 years      | 11-12 | 1.74E-06 | 4.58E-09 | 6.13E-05 |
| DTXSID0024266 | Pirimiphos-methyl  | 29232-93-7 | 66 years and older | 11-12 | 2.03E-06 | 4.52E-09 | 7.63E-05 |
| DTXSID0024266 | Pirimiphos-methyl  | 29232-93-7 | ReproAgeFemale     | 11-12 | 1.74E-06 | 4.18E-09 | 6.86E-05 |
| DTXSID0024266 | Pirimiphos-methyl  | 29232-93-7 | BMI <= 30          | 11-12 | 2.38E-06 | 6.05E-09 | 8.53E-05 |
| DTXSID0024266 | Pirimiphos-methyl  | 29232-93-7 | BMI > 30           | 11-12 | 1.17E-06 | 2.48E-09 | 4.24E-05 |
| DTXSID4032459 | Phorate            | 298-02-2   | Total              | 11-12 | 1.43E-07 | 9.47E-10 | 6.53E-06 |
| DTXSID4032459 | Phorate            | 298-02-2   | Male               | 11-12 | 1.62E-07 | 1.33E-09 | 7.30E-06 |
| DTXSID4032459 | Phorate            | 298-02-2   | Female             | 11-12 | 1.37E-07 | 9.51E-10 | 7.24E-06 |
| DTXSID4032459 | Phorate            | 298-02-2   | 6 - 11 years       | 11-12 | 1.84E-07 | 1.10E-09 | 8.39E-06 |
| DTXSID4032459 | Phorate            | 298-02-2   | 12 - 19 years      | 11-12 | 1.90E-07 | 1.74E-09 | 9.01E-06 |
| DTXSID4032459 | Phorate            | 298-02-2   | 20 - 65 years      | 11-12 | 1.54E-07 | 9.77E-10 | 7.37E-06 |
| DTXSID4032459 | Phorate            | 298-02-2   | 66 years and older | 11-12 | 1.42E-07 | 1.15E-09 | 6.36E-06 |
| DTXSID4032459 | Phorate            | 298-02-2   | ReproAgeFemale     | 11-12 | 1.49E-07 | 8.12E-10 | 6.07E-06 |
| DTXSID4032459 | Phorate            | 298-02-2   | BMI <= 30          | 11-12 | 1.56E-07 | 1.00E-09 | 7.25E-06 |
| DTXSID4032459 | Phorate            | 298-02-2   | BMI > 30           | 11-12 | 1.41E-07 | 8.59E-10 | 6.79E-06 |
| DTXSID0022018 | Disulfoton         | 298-04-4   | Total              | 11-12 | 1.68E-07 | 1.31E-09 | 8.69E-06 |
| DTXSID0022018 | Disulfoton         | 298-04-4   | Male               | 11-12 | 1.64E-07 | 1.05E-09 | 7.65E-06 |

|               |                   |           |                    |       |          |          |          |
|---------------|-------------------|-----------|--------------------|-------|----------|----------|----------|
| DTXSID0022018 | Disulfoton        | 298-04-4  | Female             | 11-12 | 1.53E-07 | 9.47E-10 | 7.71E-06 |
| DTXSID0022018 | Disulfoton        | 298-04-4  | 6 - 11 years       | 11-12 | 2.08E-07 | 1.42E-09 | 9.09E-06 |
| DTXSID0022018 | Disulfoton        | 298-04-4  | 12 - 19 years      | 11-12 | 2.02E-07 | 1.85E-09 | 1.02E-05 |
| DTXSID0022018 | Disulfoton        | 298-04-4  | 20 - 65 years      | 11-12 | 1.64E-07 | 1.34E-09 | 6.99E-06 |
| DTXSID0022018 | Disulfoton        | 298-04-4  | 66 years and older | 11-12 | 1.47E-07 | 1.11E-09 | 6.18E-06 |
| DTXSID0022018 | Disulfoton        | 298-04-4  | ReproAgeFemale     | 11-12 | 1.69E-07 | 1.09E-09 | 7.35E-06 |
| DTXSID0022018 | Disulfoton        | 298-04-4  | BMI <= 30          | 11-12 | 1.60E-07 | 1.12E-09 | 8.78E-06 |
| DTXSID0022018 | Disulfoton        | 298-04-4  | BMI > 30           | 11-12 | 1.56E-07 | 1.14E-09 | 7.08E-06 |
| DTXSID1024209 | Naled             | 300-76-5  | Total              | 11-12 | 1.63E-06 | 4.07E-09 | 5.61E-05 |
| DTXSID1024209 | Naled             | 300-76-5  | Male               | 11-12 | 1.68E-06 | 5.33E-09 | 6.17E-05 |
| DTXSID1024209 | Naled             | 300-76-5  | Female             | 11-12 | 1.54E-06 | 3.41E-09 | 5.92E-05 |
| DTXSID1024209 | Naled             | 300-76-5  | 6 - 11 years       | 11-12 | 2.87E-06 | 6.73E-09 | 1.31E-04 |
| DTXSID1024209 | Naled             | 300-76-5  | 12 - 19 years      | 11-12 | 1.66E-06 | 4.34E-09 | 5.97E-05 |
| DTXSID1024209 | Naled             | 300-76-5  | 20 - 65 years      | 11-12 | 1.54E-06 | 4.39E-09 | 5.77E-05 |
| DTXSID1024209 | Naled             | 300-76-5  | 66 years and older | 11-12 | 1.33E-06 | 5.22E-09 | 5.18E-05 |
| DTXSID1024209 | Naled             | 300-76-5  | ReproAgeFemale     | 11-12 | 1.49E-06 | 3.89E-09 | 6.24E-05 |
| DTXSID1024209 | Naled             | 300-76-5  | BMI <= 30          | 11-12 | 2.02E-06 | 5.66E-09 | 7.45E-05 |
| DTXSID1024209 | Naled             | 300-76-5  | BMI > 30           | 11-12 | 1.13E-06 | 3.15E-09 | 4.15E-05 |
| DTXSID8025541 | Oxydemeton-methyl | 301-12-2  | Total              | 11-12 | 1.53E-06 | 2.95E-09 | 5.44E-05 |
| DTXSID8025541 | Oxydemeton-methyl | 301-12-2  | Male               | 11-12 | 1.51E-06 | 3.53E-09 | 5.48E-05 |
| DTXSID8025541 | Oxydemeton-methyl | 301-12-2  | Female             | 11-12 | 1.49E-06 | 3.73E-09 | 5.24E-05 |
| DTXSID8025541 | Oxydemeton-methyl | 301-12-2  | 6 - 11 years       | 11-12 | 2.61E-06 | 5.61E-09 | 1.14E-04 |
| DTXSID8025541 | Oxydemeton-methyl | 301-12-2  | 12 - 19 years      | 11-12 | 1.45E-06 | 4.90E-09 | 4.37E-05 |
| DTXSID8025541 | Oxydemeton-methyl | 301-12-2  | 20 - 65 years      | 11-12 | 1.32E-06 | 2.74E-09 | 4.90E-05 |
| DTXSID8025541 | Oxydemeton-methyl | 301-12-2  | 66 years and older | 11-12 | 1.64E-06 | 3.44E-09 | 6.21E-05 |
| DTXSID8025541 | Oxydemeton-methyl | 301-12-2  | ReproAgeFemale     | 11-12 | 1.28E-06 | 1.93E-09 | 5.52E-05 |
| DTXSID8025541 | Oxydemeton-methyl | 301-12-2  | BMI <= 30          | 11-12 | 1.71E-06 | 4.89E-09 | 6.42E-05 |
| DTXSID8025541 | Oxydemeton-methyl | 301-12-2  | BMI > 30           | 11-12 | 9.40E-07 | 2.90E-09 | 3.43E-05 |
| DTXSID1032484 | Temephos          | 3383-96-8 | Total              | 11-12 | 2.67E-06 | 4.98E-09 | 1.00E-04 |
| DTXSID1032484 | Temephos          | 3383-96-8 | Male               | 11-12 | 2.77E-06 | 7.31E-09 | 1.02E-04 |
| DTXSID1032484 | Temephos          | 3383-96-8 | Female             | 11-12 | 2.60E-06 | 6.44E-09 | 1.03E-04 |
| DTXSID1032484 | Temephos          | 3383-96-8 | 6 - 11 years       | 11-12 | 4.39E-06 | 8.62E-09 | 1.99E-04 |
| DTXSID1032484 | Temephos          | 3383-96-8 | 12 - 19 years      | 11-12 | 2.61E-06 | 8.16E-09 | 9.36E-05 |
| DTXSID1032484 | Temephos          | 3383-96-8 | 20 - 65 years      | 11-12 | 2.70E-06 | 5.83E-09 | 9.36E-05 |
| DTXSID1032484 | Temephos          | 3383-96-8 | 66 years and older | 11-12 | 3.04E-06 | 7.70E-09 | 1.15E-04 |
| DTXSID1032484 | Temephos          | 3383-96-8 | ReproAgeFemale     | 11-12 | 2.62E-06 | 5.05E-09 | 1.04E-04 |
| DTXSID1032484 | Temephos          | 3383-96-8 | BMI <= 30          | 11-12 | 3.21E-06 | 7.14E-09 | 1.24E-04 |
| DTXSID1032484 | Temephos          | 3383-96-8 | BMI > 30           | 11-12 | 1.87E-06 | 4.15E-09 | 6.68E-05 |
| DTXSID7024328 | Sulfotepp         | 3689-24-5 | Total              | 11-12 | 2.71E-06 | 5.85E-09 | 6.62E-05 |
| DTXSID7024328 | Sulfotepp         | 3689-24-5 | Male               | 11-12 | 2.75E-06 | 5.70E-09 | 6.73E-05 |
| DTXSID7024328 | Sulfotepp         | 3689-24-5 | Female             | 11-12 | 2.38E-06 | 4.43E-09 | 6.65E-05 |
| DTXSID7024328 | Sulfotepp         | 3689-24-5 | 6 - 11 years       | 11-12 | 4.65E-06 | 1.06E-08 | 1.41E-04 |
| DTXSID7024328 | Sulfotepp         | 3689-24-5 | 12 - 19 years      | 11-12 | 2.55E-06 | 6.14E-09 | 6.45E-05 |
| DTXSID7024328 | Sulfotepp         | 3689-24-5 | 20 - 65 years      | 11-12 | 2.33E-06 | 4.67E-09 | 6.20E-05 |
| DTXSID7024328 | Sulfotepp         | 3689-24-5 | 66 years and older | 11-12 | 2.20E-06 | 5.87E-09 | 5.63E-05 |
| DTXSID7024328 | Sulfotepp         | 3689-24-5 | ReproAgeFemale     | 11-12 | 2.24E-06 | 3.78E-09 | 6.19E-05 |
| DTXSID7024328 | Sulfotepp         | 3689-24-5 | BMI <= 30          | 11-12 | 2.99E-06 | 5.95E-09 | 7.61E-05 |

|               |                       |            |                    |       |          |          |          |
|---------------|-----------------------|------------|--------------------|-------|----------|----------|----------|
| DTXSID7024328 | Sulfotepp             | 3689-24-5  | BMI > 30           | 11-12 | 1.77E-06 | 4.61E-09 | 4.63E-05 |
| DTXSID8042058 | Isazaphos-methyl      | 42509-83-1 | Total              | 11-12 | 1.89E-06 | 4.66E-09 | 6.75E-05 |
| DTXSID8042058 | Isazaphos-methyl      | 42509-83-1 | Male               | 11-12 | 2.00E-06 | 5.52E-09 | 6.90E-05 |
| DTXSID8042058 | Isazaphos-methyl      | 42509-83-1 | Female             | 11-12 | 1.77E-06 | 4.29E-09 | 6.50E-05 |
| DTXSID8042058 | Isazaphos-methyl      | 42509-83-1 | 6 - 11 years       | 11-12 | 3.21E-06 | 5.97E-09 | 1.41E-04 |
| DTXSID8042058 | Isazaphos-methyl      | 42509-83-1 | 12 - 19 years      | 11-12 | 1.82E-06 | 4.35E-09 | 5.89E-05 |
| DTXSID8042058 | Isazaphos-methyl      | 42509-83-1 | 20 - 65 years      | 11-12 | 1.76E-06 | 4.81E-09 | 6.08E-05 |
| DTXSID8042058 | Isazaphos-methyl      | 42509-83-1 | 66 years and older | 11-12 | 2.14E-06 | 5.01E-09 | 7.89E-05 |
| DTXSID8042058 | Isazaphos-methyl      | 42509-83-1 | ReproAgeFemale     | 11-12 | 1.65E-06 | 2.24E-09 | 7.09E-05 |
| DTXSID8042058 | Isazaphos-methyl      | 42509-83-1 | BMI <= 30          | 11-12 | 2.19E-06 | 3.98E-09 | 8.15E-05 |
| DTXSID8042058 | Isazaphos-methyl      | 42509-83-1 | BMI > 30           | 11-12 | 1.30E-06 | 3.54E-09 | 4.35E-05 |
| DTXSID1021401 | Trimethylarsine oxide | 4964-14-1  | Total              | 11-12 | 4.11E-07 | 3.44E-08 | 1.32E-06 |
| DTXSID1021401 | Trimethylarsine oxide | 4964-14-1  | Male               | 11-12 | 4.21E-07 | 4.46E-08 | 1.29E-06 |
| DTXSID1021401 | Trimethylarsine oxide | 4964-14-1  | Female             | 11-12 | 4.35E-07 | 3.78E-08 | 1.33E-06 |
| DTXSID1021401 | Trimethylarsine oxide | 4964-14-1  | 6 - 11 years       | 11-12 | 7.33E-07 | 1.61E-07 | 1.82E-06 |
| DTXSID1021401 | Trimethylarsine oxide | 4964-14-1  | 12 - 19 years      | 11-12 | 5.83E-07 | 9.21E-08 | 1.62E-06 |
| DTXSID1021401 | Trimethylarsine oxide | 4964-14-1  | 20 - 65 years      | 11-12 | 3.77E-07 | 3.76E-08 | 1.22E-06 |
| DTXSID1021401 | Trimethylarsine oxide | 4964-14-1  | 66 years and older | 11-12 | 4.57E-07 | 4.00E-08 | 1.49E-06 |
| DTXSID1021401 | Trimethylarsine oxide | 4964-14-1  | ReproAgeFemale     | 11-12 | 4.29E-07 | 3.47E-08 | 1.35E-06 |
| DTXSID1021401 | Trimethylarsine oxide | 4964-14-1  | BMI <= 30          | 11-12 | 4.42E-07 | 4.04E-08 | 1.32E-06 |
| DTXSID1021401 | Trimethylarsine oxide | 4964-14-1  | BMI > 30           | 11-12 | 4.05E-07 | 3.71E-08 | 1.45E-06 |
| DTXSID0021389 | Trichlorfon           | 52-68-6    | Total              | 11-12 | 1.03E-06 | 2.77E-09 | 4.15E-05 |
| DTXSID0021389 | Trichlorfon           | 52-68-6    | Male               | 11-12 | 1.16E-06 | 3.08E-09 | 4.14E-05 |
| DTXSID0021389 | Trichlorfon           | 52-68-6    | Female             | 11-12 | 1.09E-06 | 2.97E-09 | 4.16E-05 |
| DTXSID0021389 | Trichlorfon           | 52-68-6    | 6 - 11 years       | 11-12 | 2.15E-06 | 5.82E-09 | 8.32E-05 |
| DTXSID0021389 | Trichlorfon           | 52-68-6    | 12 - 19 years      | 11-12 | 1.10E-06 | 3.65E-09 | 4.01E-05 |
| DTXSID0021389 | Trichlorfon           | 52-68-6    | 20 - 65 years      | 11-12 | 1.05E-06 | 3.64E-09 | 3.68E-05 |
| DTXSID0021389 | Trichlorfon           | 52-68-6    | 66 years and older | 11-12 | 1.00E-06 | 3.97E-09 | 3.56E-05 |
| DTXSID0021389 | Trichlorfon           | 52-68-6    | ReproAgeFemale     | 11-12 | 9.58E-07 | 2.17E-09 | 4.41E-05 |
| DTXSID0021389 | Trichlorfon           | 52-68-6    | BMI <= 30          | 11-12 | 1.24E-06 | 4.20E-09 | 4.71E-05 |
| DTXSID0021389 | Trichlorfon           | 52-68-6    | BMI > 30           | 11-12 | 7.82E-07 | 2.58E-09 | 2.77E-05 |
| DTXSID2032344 | Chlorethoxyphos       | 54593-83-8 | Total              | 11-12 | 2.95E-06 | 6.23E-09 | 6.94E-05 |
| DTXSID2032344 | Chlorethoxyphos       | 54593-83-8 | Male               | 11-12 | 2.76E-06 | 5.55E-09 | 6.95E-05 |
| DTXSID2032344 | Chlorethoxyphos       | 54593-83-8 | Female             | 11-12 | 2.80E-06 | 5.73E-09 | 7.13E-05 |
| DTXSID2032344 | Chlorethoxyphos       | 54593-83-8 | 6 - 11 years       | 11-12 | 4.57E-06 | 4.96E-09 | 1.46E-04 |
| DTXSID2032344 | Chlorethoxyphos       | 54593-83-8 | 12 - 19 years      | 11-12 | 2.65E-06 | 7.60E-09 | 6.87E-05 |
| DTXSID2032344 | Chlorethoxyphos       | 54593-83-8 | 20 - 65 years      | 11-12 | 2.65E-06 | 6.33E-09 | 6.64E-05 |
| DTXSID2032344 | Chlorethoxyphos       | 54593-83-8 | 66 years and older | 11-12 | 2.30E-06 | 6.04E-09 | 5.89E-05 |
| DTXSID2032344 | Chlorethoxyphos       | 54593-83-8 | ReproAgeFemale     | 11-12 | 2.32E-06 | 4.52E-09 | 6.39E-05 |
| DTXSID2032344 | Chlorethoxyphos       | 54593-83-8 | BMI <= 30          | 11-12 | 3.14E-06 | 6.02E-09 | 8.05E-05 |
| DTXSID2032344 | Chlorethoxyphos       | 54593-83-8 | BMI > 30           | 11-12 | 1.95E-06 | 3.99E-09 | 4.86E-05 |
| DTXSID8020620 | Fenthion              | 55-38-9    | Total              | 11-12 | 1.69E-06 | 4.14E-09 | 6.32E-05 |
| DTXSID8020620 | Fenthion              | 55-38-9    | Male               | 11-12 | 1.67E-06 | 4.34E-09 | 6.18E-05 |
| DTXSID8020620 | Fenthion              | 55-38-9    | Female             | 11-12 | 1.63E-06 | 4.41E-09 | 5.49E-05 |
| DTXSID8020620 | Fenthion              | 55-38-9    | 6 - 11 years       | 11-12 | 3.01E-06 | 6.59E-09 | 1.18E-04 |
| DTXSID8020620 | Fenthion              | 55-38-9    | 12 - 19 years      | 11-12 | 1.61E-06 | 4.45E-09 | 5.83E-05 |
| DTXSID8020620 | Fenthion              | 55-38-9    | 20 - 65 years      | 11-12 | 1.58E-06 | 4.41E-09 | 5.78E-05 |



|               |                      |           |                    |       |          |          |          |
|---------------|----------------------|-----------|--------------------|-------|----------|----------|----------|
| DTXSID8020620 | Fenthion             | 55-38-9   | 66 years and older | 11-12 | 1.67E-06 | 4.05E-09 | 6.80E-05 |
| DTXSID8020620 | Fenthion             | 55-38-9   | ReproAgeFemale     | 11-12 | 1.51E-06 | 2.64E-09 | 6.11E-05 |
| DTXSID8020620 | Fenthion             | 55-38-9   | BMI <= 30          | 11-12 | 1.76E-06 | 3.24E-09 | 7.42E-05 |
| DTXSID8020620 | Fenthion             | 55-38-9   | BMI > 30           | 11-12 | 1.06E-06 | 2.33E-09 | 3.97E-05 |
| DTXSID2020347 | Coumaphos            | 56-72-4   | Total              | 11-12 | 3.34E-06 | 7.44E-09 | 7.55E-05 |
| DTXSID2020347 | Coumaphos            | 56-72-4   | Male               | 11-12 | 2.91E-06 | 5.93E-09 | 7.55E-05 |
| DTXSID2020347 | Coumaphos            | 56-72-4   | Female             | 11-12 | 2.92E-06 | 6.69E-09 | 7.58E-05 |
| DTXSID2020347 | Coumaphos            | 56-72-4   | 6 - 11 years       | 11-12 | 6.01E-06 | 1.43E-08 | 1.57E-04 |
| DTXSID2020347 | Coumaphos            | 56-72-4   | 12 - 19 years      | 11-12 | 2.92E-06 | 7.76E-09 | 7.44E-05 |
| DTXSID2020347 | Coumaphos            | 56-72-4   | 20 - 65 years      | 11-12 | 2.99E-06 | 5.39E-09 | 6.96E-05 |
| DTXSID2020347 | Coumaphos            | 56-72-4   | 66 years and older | 11-12 | 2.56E-06 | 5.80E-09 | 6.44E-05 |
| DTXSID2020347 | Coumaphos            | 56-72-4   | ReproAgeFemale     | 11-12 | 2.61E-06 | 5.13E-09 | 7.02E-05 |
| DTXSID2020347 | Coumaphos            | 56-72-4   | BMI <= 30          | 11-12 | 3.28E-06 | 7.82E-09 | 8.65E-05 |
| DTXSID2020347 | Coumaphos            | 56-72-4   | BMI > 30           | 11-12 | 1.90E-06 | 3.08E-09 | 5.21E-05 |
| DTXSID2024086 | Ethion               | 563-12-2  | Total              | 11-12 | 2.27E-07 | 1.54E-09 | 1.24E-05 |
| DTXSID2024086 | Ethion               | 563-12-2  | Male               | 11-12 | 2.24E-07 | 1.54E-09 | 1.27E-05 |
| DTXSID2024086 | Ethion               | 563-12-2  | Female             | 11-12 | 2.15E-07 | 1.63E-09 | 1.10E-05 |
| DTXSID2024086 | Ethion               | 563-12-2  | 6 - 11 years       | 11-12 | 3.08E-07 | 3.30E-09 | 1.39E-05 |
| DTXSID2024086 | Ethion               | 563-12-2  | 12 - 19 years      | 11-12 | 2.96E-07 | 2.04E-09 | 1.53E-05 |
| DTXSID2024086 | Ethion               | 563-12-2  | 20 - 65 years      | 11-12 | 2.28E-07 | 1.46E-09 | 1.10E-05 |
| DTXSID2024086 | Ethion               | 563-12-2  | 66 years and older | 11-12 | 2.02E-07 | 1.01E-09 | 1.08E-05 |
| DTXSID2024086 | Ethion               | 563-12-2  | ReproAgeFemale     | 11-12 | 2.21E-07 | 1.17E-09 | 1.21E-05 |
| DTXSID2024086 | Ethion               | 563-12-2  | BMI <= 30          | 11-12 | 2.46E-07 | 1.67E-09 | 1.33E-05 |
| DTXSID2024086 | Ethion               | 563-12-2  | BMI > 30           | 11-12 | 2.08E-07 | 1.17E-09 | 9.55E-06 |
| DTXSID4052718 | Phosphorothioic acid | 5871-17-0 | Total              | 11-12 | 3.93E-06 | 3.71E-06 | 4.17E-06 |
| DTXSID4052718 | Phosphorothioic acid | 5871-17-0 | Male               | 11-12 | 4.09E-06 | 3.48E-06 | 4.82E-06 |
| DTXSID4052718 | Phosphorothioic acid | 5871-17-0 | Female             | 11-12 | 3.80E-06 | 3.37E-06 | 4.31E-06 |
| DTXSID4052718 | Phosphorothioic acid | 5871-17-0 | 6 - 11 years       | 11-12 | 7.13E-06 | 5.89E-06 | 8.78E-06 |
| DTXSID4052718 | Phosphorothioic acid | 5871-17-0 | 12 - 19 years      | 11-12 | 3.75E-06 | 3.07E-06 | 4.57E-06 |
| DTXSID4052718 | Phosphorothioic acid | 5871-17-0 | 20 - 65 years      | 11-12 | 3.63E-06 | 3.15E-06 | 4.20E-06 |
| DTXSID4052718 | Phosphorothioic acid | 5871-17-0 | 66 years and older | 11-12 | 4.28E-06 | 3.53E-06 | 5.19E-06 |
| DTXSID4052718 | Phosphorothioic acid | 5871-17-0 | ReproAgeFemale     | 11-12 | 3.60E-06 | 3.16E-06 | 4.10E-06 |
| DTXSID4052718 | Phosphorothioic acid | 5871-17-0 | BMI <= 30          | 11-12 | 4.71E-06 | 4.41E-06 | 5.06E-06 |
| DTXSID4052718 | Phosphorothioic acid | 5871-17-0 | BMI > 30           | 11-12 | 2.62E-06 | 2.38E-06 | 2.90E-06 |
| DTXSID7020479 | Dimethoate           | 60-51-5   | Total              | 11-12 | 6.38E-07 | 2.32E-09 | 2.58E-05 |
| DTXSID7020479 | Dimethoate           | 60-51-5   | Male               | 11-12 | 5.90E-07 | 2.36E-09 | 2.45E-05 |
| DTXSID7020479 | Dimethoate           | 60-51-5   | Female             | 11-12 | 6.03E-07 | 1.52E-09 | 2.40E-05 |
| DTXSID7020479 | Dimethoate           | 60-51-5   | 6 - 11 years       | 11-12 | 1.15E-06 | 5.08E-09 | 4.65E-05 |
| DTXSID7020479 | Dimethoate           | 60-51-5   | 12 - 19 years      | 11-12 | 5.68E-07 | 2.26E-09 | 2.03E-05 |
| DTXSID7020479 | Dimethoate           | 60-51-5   | 20 - 65 years      | 11-12 | 6.13E-07 | 2.17E-09 | 2.65E-05 |
| DTXSID7020479 | Dimethoate           | 60-51-5   | 66 years and older | 11-12 | 6.21E-07 | 2.88E-09 | 2.58E-05 |
| DTXSID7020479 | Dimethoate           | 60-51-5   | ReproAgeFemale     | 11-12 | 5.78E-07 | 1.71E-09 | 2.63E-05 |
| DTXSID7020479 | Dimethoate           | 60-51-5   | BMI <= 30          | 11-12 | 7.39E-07 | 2.81E-09 | 3.05E-05 |
| DTXSID7020479 | Dimethoate           | 60-51-5   | BMI > 30           | 11-12 | 4.70E-07 | 1.88E-09 | 1.63E-05 |
| DTXSID5020449 | Dichlorvos           | 62-73-7   | Total              | 11-12 | 9.64E-07 | 2.39E-09 | 3.58E-05 |
| DTXSID5020449 | Dichlorvos           | 62-73-7   | Male               | 11-12 | 1.00E-06 | 3.13E-09 | 3.66E-05 |
| DTXSID5020449 | Dichlorvos           | 62-73-7   | Female             | 11-12 | 8.67E-07 | 2.36E-09 | 3.41E-05 |

|               |                        |          |                    |       |          |          |          |
|---------------|------------------------|----------|--------------------|-------|----------|----------|----------|
| DTXSID5020449 | Dichlorvos             | 62-73-7  | 6 - 11 years       | 11-12 | 1.49E-06 | 2.79E-09 | 6.91E-05 |
| DTXSID5020449 | Dichlorvos             | 62-73-7  | 12 - 19 years      | 11-12 | 9.99E-07 | 3.24E-09 | 3.48E-05 |
| DTXSID5020449 | Dichlorvos             | 62-73-7  | 20 - 65 years      | 11-12 | 9.22E-07 | 2.64E-09 | 3.29E-05 |
| DTXSID5020449 | Dichlorvos             | 62-73-7  | 66 years and older | 11-12 | 8.36E-07 | 2.44E-09 | 3.10E-05 |
| DTXSID5020449 | Dichlorvos             | 62-73-7  | ReproAgeFemale     | 11-12 | 8.37E-07 | 2.17E-09 | 3.63E-05 |
| DTXSID5020449 | Dichlorvos             | 62-73-7  | BMI <= 30          | 11-12 | 1.11E-06 | 3.15E-09 | 4.08E-05 |
| DTXSID5020449 | Dichlorvos             | 62-73-7  | BMI > 30           | 11-12 | 6.15E-07 | 1.45E-09 | 2.36E-05 |
| DTXSID5024261 | Phosmet                | 732-11-6 | Total              | 11-12 | 9.11E-07 | 3.26E-09 | 3.47E-05 |
| DTXSID5024261 | Phosmet                | 732-11-6 | Male               | 11-12 | 8.85E-07 | 2.95E-09 | 3.55E-05 |
| DTXSID5024261 | Phosmet                | 732-11-6 | Female             | 11-12 | 9.02E-07 | 2.54E-09 | 3.78E-05 |
| DTXSID5024261 | Phosmet                | 732-11-6 | 6 - 11 years       | 11-12 | 1.65E-06 | 6.58E-09 | 7.47E-05 |
| DTXSID5024261 | Phosmet                | 732-11-6 | 12 - 19 years      | 11-12 | 8.78E-07 | 3.77E-09 | 3.20E-05 |
| DTXSID5024261 | Phosmet                | 732-11-6 | 20 - 65 years      | 11-12 | 7.89E-07 | 2.44E-09 | 3.34E-05 |
| DTXSID5024261 | Phosmet                | 732-11-6 | 66 years and older | 11-12 | 8.96E-07 | 3.48E-09 | 4.22E-05 |
| DTXSID5024261 | Phosmet                | 732-11-6 | ReproAgeFemale     | 11-12 | 7.63E-07 | 2.01E-09 | 3.60E-05 |
| DTXSID5024261 | Phosmet                | 732-11-6 | BMI <= 30          | 11-12 | 9.52E-07 | 3.34E-09 | 4.11E-05 |
| DTXSID5024261 | Phosmet                | 732-11-6 | BMI > 30           | 11-12 | 6.65E-07 | 2.45E-09 | 2.46E-05 |
| DTXSID3020122 | Azinphos methyl        | 86-50-0  | Total              | 11-12 | 9.49E-07 | 3.41E-09 | 3.35E-05 |
| DTXSID3020122 | Azinphos methyl        | 86-50-0  | Male               | 11-12 | 8.59E-07 | 3.03E-09 | 3.79E-05 |
| DTXSID3020122 | Azinphos methyl        | 86-50-0  | Female             | 11-12 | 8.31E-07 | 3.13E-09 | 3.55E-05 |
| DTXSID3020122 | Azinphos methyl        | 86-50-0  | 6 - 11 years       | 11-12 | 1.63E-06 | 3.95E-09 | 6.91E-05 |
| DTXSID3020122 | Azinphos methyl        | 86-50-0  | 12 - 19 years      | 11-12 | 8.91E-07 | 4.36E-09 | 3.25E-05 |
| DTXSID3020122 | Azinphos methyl        | 86-50-0  | 20 - 65 years      | 11-12 | 8.68E-07 | 2.81E-09 | 3.75E-05 |
| DTXSID3020122 | Azinphos methyl        | 86-50-0  | 66 years and older | 11-12 | 8.67E-07 | 3.42E-09 | 3.63E-05 |
| DTXSID3020122 | Azinphos methyl        | 86-50-0  | ReproAgeFemale     | 11-12 | 8.48E-07 | 2.77E-09 | 3.89E-05 |
| DTXSID3020122 | Azinphos methyl        | 86-50-0  | BMI <= 30          | 11-12 | 1.04E-06 | 2.76E-09 | 4.75E-05 |
| DTXSID3020122 | Azinphos methyl        | 86-50-0  | BMI > 30           | 11-12 | 5.98E-07 | 2.00E-09 | 2.22E-05 |
| DTXSID5020819 | Methidathion           | 950-37-8 | Total              | 11-12 | 8.58E-07 | 3.73E-09 | 3.28E-05 |
| DTXSID5020819 | Methidathion           | 950-37-8 | Male               | 11-12 | 8.67E-07 | 4.28E-09 | 3.31E-05 |
| DTXSID5020819 | Methidathion           | 950-37-8 | Female             | 11-12 | 9.31E-07 | 3.09E-09 | 4.02E-05 |
| DTXSID5020819 | Methidathion           | 950-37-8 | 6 - 11 years       | 11-12 | 1.47E-06 | 4.62E-09 | 6.86E-05 |
| DTXSID5020819 | Methidathion           | 950-37-8 | 12 - 19 years      | 11-12 | 8.64E-07 | 3.85E-09 | 2.99E-05 |
| DTXSID5020819 | Methidathion           | 950-37-8 | 20 - 65 years      | 11-12 | 8.05E-07 | 3.01E-09 | 3.27E-05 |
| DTXSID5020819 | Methidathion           | 950-37-8 | 66 years and older | 11-12 | 8.85E-07 | 4.14E-09 | 3.64E-05 |
| DTXSID5020819 | Methidathion           | 950-37-8 | ReproAgeFemale     | 11-12 | 7.72E-07 | 2.71E-09 | 3.68E-05 |
| DTXSID5020819 | Methidathion           | 950-37-8 | BMI <= 30          | 11-12 | 9.78E-07 | 2.96E-09 | 4.01E-05 |
| DTXSID5020819 | Methidathion           | 950-37-8 | BMI > 30           | 11-12 | 6.27E-07 | 2.74E-09 | 2.40E-05 |
| DTXSID8026195 | 1,3,5-Trichlorobenzene | 108-70-3 | Total              | 09-10 | 2.92E-07 | 5.38E-10 | 2.85E-06 |
| DTXSID8026195 | 1,3,5-Trichlorobenzene | 108-70-3 | Male               | 09-10 | 3.06E-07 | 8.29E-10 | 2.85E-06 |
| DTXSID8026195 | 1,3,5-Trichlorobenzene | 108-70-3 | Female             | 09-10 | 2.91E-07 | 7.58E-10 | 2.91E-06 |
| DTXSID8026195 | 1,3,5-Trichlorobenzene | 108-70-3 | 6 - 11 years       | 09-10 | 5.49E-07 | 1.44E-09 | 5.16E-06 |
| DTXSID8026195 | 1,3,5-Trichlorobenzene | 108-70-3 | 12 - 19 years      | 09-10 | 3.17E-07 | 6.89E-10 | 3.35E-06 |
| DTXSID8026195 | 1,3,5-Trichlorobenzene | 108-70-3 | 20 - 65 years      | 09-10 | 2.56E-07 | 4.41E-10 | 2.72E-06 |
| DTXSID8026195 | 1,3,5-Trichlorobenzene | 108-70-3 | 66 years and older | 09-10 | 2.43E-07 | 7.08E-10 | 2.92E-06 |
| DTXSID8026195 | 1,3,5-Trichlorobenzene | 108-70-3 | ReproAgeFemale     | 09-10 | 2.78E-07 | 3.90E-10 | 2.98E-06 |
| DTXSID8026195 | 1,3,5-Trichlorobenzene | 108-70-3 | BMI <= 30          | 09-10 | 3.26E-07 | 7.48E-10 | 3.16E-06 |
| DTXSID8026195 | 1,3,5-Trichlorobenzene | 108-70-3 | BMI > 30           | 09-10 | 2.22E-07 | 5.97E-10 | 2.38E-06 |

|               |                            |          |                    |       |          |          |          |
|---------------|----------------------------|----------|--------------------|-------|----------|----------|----------|
| DTXSID2020682 | Hexachlorobenzene          | 118-74-1 | Total              | 09-10 | 8.32E-08 | 3.29E-10 | 3.37E-06 |
| DTXSID2020682 | Hexachlorobenzene          | 118-74-1 | Male               | 09-10 | 7.97E-08 | 2.79E-10 | 3.35E-06 |
| DTXSID2020682 | Hexachlorobenzene          | 118-74-1 | Female             | 09-10 | 7.51E-08 | 2.16E-10 | 3.36E-06 |
| DTXSID2020682 | Hexachlorobenzene          | 118-74-1 | 6 - 11 years       | 09-10 | 9.70E-08 | 4.20E-10 | 4.96E-06 |
| DTXSID2020682 | Hexachlorobenzene          | 118-74-1 | 12 - 19 years      | 09-10 | 7.78E-08 | 2.23E-10 | 3.56E-06 |
| DTXSID2020682 | Hexachlorobenzene          | 118-74-1 | 20 - 65 years      | 09-10 | 6.97E-08 | 3.28E-10 | 3.16E-06 |
| DTXSID2020682 | Hexachlorobenzene          | 118-74-1 | 66 years and older | 09-10 | 1.08E-07 | 3.68E-10 | 3.94E-06 |
| DTXSID2020682 | Hexachlorobenzene          | 118-74-1 | ReproAgeFemale     | 09-10 | 7.89E-08 | 3.12E-10 | 3.47E-06 |
| DTXSID2020682 | Hexachlorobenzene          | 118-74-1 | BMI <= 30          | 09-10 | 8.55E-08 | 3.07E-10 | 3.49E-06 |
| DTXSID2020682 | Hexachlorobenzene          | 118-74-1 | BMI > 30           | 09-10 | 6.93E-08 | 3.59E-10 | 2.94E-06 |
| DTXSID0021965 | 1,2,4-Trichlorobenzene     | 120-82-1 | Total              | 09-10 | 1.97E-08 | 9.25E-11 | 3.34E-07 |
| DTXSID0021965 | 1,2,4-Trichlorobenzene     | 120-82-1 | Male               | 09-10 | 1.97E-08 | 9.63E-11 | 3.36E-07 |
| DTXSID0021965 | 1,2,4-Trichlorobenzene     | 120-82-1 | Female             | 09-10 | 2.16E-08 | 1.41E-10 | 3.69E-07 |
| DTXSID0021965 | 1,2,4-Trichlorobenzene     | 120-82-1 | 6 - 11 years       | 09-10 | 2.46E-08 | 1.80E-10 | 4.23E-07 |
| DTXSID0021965 | 1,2,4-Trichlorobenzene     | 120-82-1 | 12 - 19 years      | 09-10 | 1.93E-08 | 8.30E-11 | 3.76E-07 |
| DTXSID0021965 | 1,2,4-Trichlorobenzene     | 120-82-1 | 20 - 65 years      | 09-10 | 1.81E-08 | 1.05E-10 | 3.04E-07 |
| DTXSID0021965 | 1,2,4-Trichlorobenzene     | 120-82-1 | 66 years and older | 09-10 | 2.92E-08 | 1.69E-10 | 5.34E-07 |
| DTXSID0021965 | 1,2,4-Trichlorobenzene     | 120-82-1 | ReproAgeFemale     | 09-10 | 1.71E-08 | 8.46E-11 | 3.12E-07 |
| DTXSID0021965 | 1,2,4-Trichlorobenzene     | 120-82-1 | BMI <= 30          | 09-10 | 2.19E-08 | 1.30E-10 | 3.74E-07 |
| DTXSID0021965 | 1,2,4-Trichlorobenzene     | 120-82-1 | BMI > 30           | 09-10 | 1.81E-08 | 1.25E-10 | 3.08E-07 |
| DTXSID9022360 | 4-tert-Octylphenol         | 140-66-9 | Total              | 09-10 | 5.72E-07 | 1.24E-07 | 1.50E-06 |
| DTXSID9022360 | 4-tert-Octylphenol         | 140-66-9 | Male               | 09-10 | 6.62E-07 | 1.94E-07 | 1.52E-06 |
| DTXSID9022360 | 4-tert-Octylphenol         | 140-66-9 | Female             | 09-10 | 5.90E-07 | 1.31E-07 | 1.49E-06 |
| DTXSID9022360 | 4-tert-Octylphenol         | 140-66-9 | 6 - 11 years       | 09-10 | 8.86E-07 | 3.07E-07 | 1.76E-06 |
| DTXSID9022360 | 4-tert-Octylphenol         | 140-66-9 | 12 - 19 years      | 09-10 | 7.34E-07 | 1.53E-07 | 1.78E-06 |
| DTXSID9022360 | 4-tert-Octylphenol         | 140-66-9 | 20 - 65 years      | 09-10 | 5.88E-07 | 1.42E-07 | 1.55E-06 |
| DTXSID9022360 | 4-tert-Octylphenol         | 140-66-9 | 66 years and older | 09-10 | 5.75E-07 | 1.01E-07 | 1.56E-06 |
| DTXSID9022360 | 4-tert-Octylphenol         | 140-66-9 | ReproAgeFemale     | 09-10 | 6.04E-07 | 1.28E-07 | 1.55E-06 |
| DTXSID9022360 | 4-tert-Octylphenol         | 140-66-9 | BMI <= 30          | 09-10 | 5.98E-07 | 1.19E-07 | 1.53E-06 |
| DTXSID9022360 | 4-tert-Octylphenol         | 140-66-9 | BMI > 30           | 09-10 | 6.43E-07 | 1.56E-07 | 1.60E-06 |
| DTXSID2034885 | Fenclorphos                | 299-84-3 | Total              | 09-10 | 3.60E-08 | 2.04E-10 | 6.10E-07 |
| DTXSID2034885 | Fenclorphos                | 299-84-3 | Male               | 09-10 | 3.27E-08 | 1.52E-10 | 5.78E-07 |
| DTXSID2034885 | Fenclorphos                | 299-84-3 | Female             | 09-10 | 3.59E-08 | 2.55E-10 | 6.59E-07 |
| DTXSID2034885 | Fenclorphos                | 299-84-3 | 6 - 11 years       | 09-10 | 4.22E-08 | 2.70E-10 | 7.67E-07 |
| DTXSID2034885 | Fenclorphos                | 299-84-3 | 12 - 19 years      | 09-10 | 3.46E-08 | 1.57E-10 | 6.72E-07 |
| DTXSID2034885 | Fenclorphos                | 299-84-3 | 20 - 65 years      | 09-10 | 3.18E-08 | 1.63E-10 | 5.39E-07 |
| DTXSID2034885 | Fenclorphos                | 299-84-3 | 66 years and older | 09-10 | 4.81E-08 | 2.56E-10 | 9.17E-07 |
| DTXSID2034885 | Fenclorphos                | 299-84-3 | ReproAgeFemale     | 09-10 | 3.20E-08 | 1.23E-10 | 5.83E-07 |
| DTXSID2034885 | Fenclorphos                | 299-84-3 | BMI <= 30          | 09-10 | 3.72E-08 | 2.09E-10 | 6.76E-07 |
| DTXSID2034885 | Fenclorphos                | 299-84-3 | BMI > 30           | 09-10 | 3.39E-08 | 2.00E-10 | 5.25E-07 |
| DTXSID7020685 | beta-Hexachlorocyclohexane | 319-85-7 | Total              | 09-10 | 8.08E-08 | 3.42E-10 | 3.51E-06 |
| DTXSID7020685 | beta-Hexachlorocyclohexane | 319-85-7 | Male               | 09-10 | 7.52E-08 | 2.42E-10 | 3.27E-06 |
| DTXSID7020685 | beta-Hexachlorocyclohexane | 319-85-7 | Female             | 09-10 | 8.77E-08 | 3.00E-10 | 3.63E-06 |
| DTXSID7020685 | beta-Hexachlorocyclohexane | 319-85-7 | 6 - 11 years       | 09-10 | 1.04E-07 | 3.20E-10 | 5.25E-06 |
| DTXSID7020685 | beta-Hexachlorocyclohexane | 319-85-7 | 12 - 19 years      | 09-10 | 8.40E-08 | 2.22E-10 | 3.99E-06 |
| DTXSID7020685 | beta-Hexachlorocyclohexane | 319-85-7 | 20 - 65 years      | 09-10 | 7.07E-08 | 2.70E-10 | 3.03E-06 |
| DTXSID7020685 | beta-Hexachlorocyclohexane | 319-85-7 | 66 years and older | 09-10 | 1.15E-07 | 4.23E-10 | 3.86E-06 |

|               |                            |          |                    |       |          |          |          |
|---------------|----------------------------|----------|--------------------|-------|----------|----------|----------|
| DTXSID7020685 | beta-Hexachlorocyclohexane | 319-85-7 | ReproAgeFemale     | 09-10 | 7.27E-08 | 2.55E-10 | 3.16E-06 |
| DTXSID7020685 | beta-Hexachlorocyclohexane | 319-85-7 | BMI <= 30          | 09-10 | 8.72E-08 | 4.06E-10 | 3.59E-06 |
| DTXSID7020685 | beta-Hexachlorocyclohexane | 319-85-7 | BMI > 30           | 09-10 | 7.24E-08 | 3.67E-10 | 3.04E-06 |
| DTXSID9038420 | Trichloronate              | 327-98-0 | Total              | 09-10 | 3.72E-08 | 2.45E-10 | 6.38E-07 |
| DTXSID9038420 | Trichloronate              | 327-98-0 | Male               | 09-10 | 3.62E-08 | 2.45E-10 | 5.73E-07 |
| DTXSID9038420 | Trichloronate              | 327-98-0 | Female             | 09-10 | 3.42E-08 | 2.02E-10 | 6.78E-07 |
| DTXSID9038420 | Trichloronate              | 327-98-0 | 6 - 11 years       | 09-10 | 4.74E-08 | 3.60E-10 | 7.87E-07 |
| DTXSID9038420 | Trichloronate              | 327-98-0 | 12 - 19 years      | 09-10 | 3.38E-08 | 1.92E-10 | 6.51E-07 |
| DTXSID9038420 | Trichloronate              | 327-98-0 | 20 - 65 years      | 09-10 | 3.33E-08 | 1.94E-10 | 5.53E-07 |
| DTXSID9038420 | Trichloronate              | 327-98-0 | 66 years and older | 09-10 | 5.23E-08 | 3.48E-10 | 9.88E-07 |
| DTXSID9038420 | Trichloronate              | 327-98-0 | ReproAgeFemale     | 09-10 | 3.36E-08 | 1.56E-10 | 6.23E-07 |
| DTXSID9038420 | Trichloronate              | 327-98-0 | BMI <= 30          | 09-10 | 3.98E-08 | 2.49E-10 | 7.02E-07 |
| DTXSID9038420 | Trichloronate              | 327-98-0 | BMI > 30           | 09-10 | 3.14E-08 | 2.05E-10 | 5.47E-07 |
| DTXSID5022308 | Genistein                  | 446-72-0 | Total              | 09-10 | 5.60E-04 | 5.25E-04 | 5.96E-04 |
| DTXSID5022308 | Genistein                  | 446-72-0 | Male               | 09-10 | 5.71E-04 | 5.16E-04 | 6.36E-04 |
| DTXSID5022308 | Genistein                  | 446-72-0 | Female             | 09-10 | 5.49E-04 | 4.92E-04 | 6.15E-04 |
| DTXSID5022308 | Genistein                  | 446-72-0 | 6 - 11 years       | 09-10 | 1.19E-03 | 1.01E-03 | 1.40E-03 |
| DTXSID5022308 | Genistein                  | 446-72-0 | 12 - 19 years      | 09-10 | 6.54E-04 | 5.22E-04 | 8.25E-04 |
| DTXSID5022308 | Genistein                  | 446-72-0 | 20 - 65 years      | 09-10 | 5.18E-04 | 4.63E-04 | 5.81E-04 |
| DTXSID5022308 | Genistein                  | 446-72-0 | 66 years and older | 09-10 | 4.25E-04 | 3.58E-04 | 5.06E-04 |
| DTXSID5022308 | Genistein                  | 446-72-0 | ReproAgeFemale     | 09-10 | 5.01E-04 | 4.39E-04 | 5.73E-04 |
| DTXSID5022308 | Genistein                  | 446-72-0 | BMI <= 30          | 09-10 | 6.52E-04 | 6.05E-04 | 7.02E-04 |
| DTXSID5022308 | Genistein                  | 446-72-0 | BMI > 30           | 09-10 | 3.94E-04 | 3.55E-04 | 4.38E-04 |
| DTXSID9022310 | Daidzein                   | 486-66-8 | Total              | 09-10 | 1.41E-03 | 1.33E-03 | 1.49E-03 |
| DTXSID9022310 | Daidzein                   | 486-66-8 | Male               | 09-10 | 1.38E-03 | 1.25E-03 | 1.54E-03 |
| DTXSID9022310 | Daidzein                   | 486-66-8 | Female             | 09-10 | 1.42E-03 | 1.31E-03 | 1.55E-03 |
| DTXSID9022310 | Daidzein                   | 486-66-8 | 6 - 11 years       | 09-10 | 3.35E-03 | 2.93E-03 | 3.84E-03 |
| DTXSID9022310 | Daidzein                   | 486-66-8 | 12 - 19 years      | 09-10 | 1.86E-03 | 1.59E-03 | 2.21E-03 |
| DTXSID9022310 | Daidzein                   | 486-66-8 | 20 - 65 years      | 09-10 | 1.26E-03 | 1.15E-03 | 1.40E-03 |
| DTXSID9022310 | Daidzein                   | 486-66-8 | 66 years and older | 09-10 | 1.02E-03 | 9.03E-04 | 1.15E-03 |
| DTXSID9022310 | Daidzein                   | 486-66-8 | ReproAgeFemale     | 09-10 | 1.31E-03 | 1.17E-03 | 1.47E-03 |
| DTXSID9022310 | Daidzein                   | 486-66-8 | BMI <= 30          | 09-10 | 1.62E-03 | 1.51E-03 | 1.73E-03 |
| DTXSID9022310 | Daidzein                   | 486-66-8 | BMI > 30           | 09-10 | 1.02E-03 | 9.27E-04 | 1.12E-03 |
| DTXSID2020686 | Lindane                    | 58-89-9  | Total              | 09-10 | 8.43E-08 | 4.17E-10 | 3.29E-06 |
| DTXSID2020686 | Lindane                    | 58-89-9  | Male               | 09-10 | 7.85E-08 | 3.36E-10 | 3.44E-06 |
| DTXSID2020686 | Lindane                    | 58-89-9  | Female             | 09-10 | 8.08E-08 | 2.61E-10 | 3.54E-06 |
| DTXSID2020686 | Lindane                    | 58-89-9  | 6 - 11 years       | 09-10 | 1.04E-07 | 4.46E-10 | 5.91E-06 |
| DTXSID2020686 | Lindane                    | 58-89-9  | 12 - 19 years      | 09-10 | 8.07E-08 | 2.60E-10 | 4.03E-06 |
| DTXSID2020686 | Lindane                    | 58-89-9  | 20 - 65 years      | 09-10 | 7.33E-08 | 2.35E-10 | 3.12E-06 |
| DTXSID2020686 | Lindane                    | 58-89-9  | 66 years and older | 09-10 | 1.13E-07 | 3.51E-10 | 4.00E-06 |
| DTXSID2020686 | Lindane                    | 58-89-9  | ReproAgeFemale     | 09-10 | 7.60E-08 | 2.63E-10 | 3.34E-06 |
| DTXSID2020686 | Lindane                    | 58-89-9  | BMI <= 30          | 09-10 | 1.02E-07 | 4.22E-10 | 4.00E-06 |
| DTXSID2020686 | Lindane                    | 58-89-9  | BMI > 30           | 09-10 | 7.65E-08 | 3.24E-10 | 2.90E-06 |
| DTXSID7020687 | Hexachlorocyclohexane      | 608-73-1 | Total              | 09-10 | 8.50E-08 | 4.68E-10 | 3.63E-06 |
| DTXSID7020687 | Hexachlorocyclohexane      | 608-73-1 | Male               | 09-10 | 7.84E-08 | 2.75E-10 | 3.37E-06 |
| DTXSID7020687 | Hexachlorocyclohexane      | 608-73-1 | Female             | 09-10 | 8.18E-08 | 2.67E-10 | 3.42E-06 |
| DTXSID7020687 | Hexachlorocyclohexane      | 608-73-1 | 6 - 11 years       | 09-10 | 1.06E-07 | 3.99E-10 | 5.70E-06 |

|               |                         |            |                    |       |          |          |          |
|---------------|-------------------------|------------|--------------------|-------|----------|----------|----------|
| DTXSID7020687 | Hexachlorocyclohexane   | 608-73-1   | 12 - 19 years      | 09-10 | 8.66E-08 | 3.68E-10 | 3.88E-06 |
| DTXSID7020687 | Hexachlorocyclohexane   | 608-73-1   | 20 - 65 years      | 09-10 | 7.20E-08 | 2.07E-10 | 3.47E-06 |
| DTXSID7020687 | Hexachlorocyclohexane   | 608-73-1   | 66 years and older | 09-10 | 1.05E-07 | 3.52E-10 | 3.96E-06 |
| DTXSID7020687 | Hexachlorocyclohexane   | 608-73-1   | ReproAgeFemale     | 09-10 | 7.53E-08 | 3.00E-10 | 3.12E-06 |
| DTXSID7020687 | Hexachlorocyclohexane   | 608-73-1   | BMI <= 30          | 09-10 | 8.35E-08 | 2.60E-10 | 3.72E-06 |
| DTXSID7020687 | Hexachlorocyclohexane   | 608-73-1   | BMI > 30           | 09-10 | 7.76E-08 | 3.07E-10 | 3.05E-06 |
| DTXSID4023913 | Beryllium               | 7440-41-7  | Total              | 09-10 | 1.97E-09 | 5.48E-12 | 7.04E-08 |
| DTXSID4023913 | Beryllium               | 7440-41-7  | Male               | 09-10 | 2.33E-09 | 7.75E-12 | 7.52E-08 |
| DTXSID4023913 | Beryllium               | 7440-41-7  | Female             | 09-10 | 2.35E-09 | 6.67E-12 | 8.63E-08 |
| DTXSID4023913 | Beryllium               | 7440-41-7  | 6 - 11 years       | 09-10 | 3.92E-09 | 1.23E-11 | 1.36E-07 |
| DTXSID4023913 | Beryllium               | 7440-41-7  | 12 - 19 years      | 09-10 | 3.36E-09 | 9.10E-12 | 1.48E-07 |
| DTXSID4023913 | Beryllium               | 7440-41-7  | 20 - 65 years      | 09-10 | 2.17E-09 | 7.53E-12 | 8.23E-08 |
| DTXSID4023913 | Beryllium               | 7440-41-7  | 66 years and older | 09-10 | 3.12E-09 | 1.03E-11 | 1.20E-07 |
| DTXSID4023913 | Beryllium               | 7440-41-7  | ReproAgeFemale     | 09-10 | 2.81E-09 | 6.32E-12 | 1.08E-07 |
| DTXSID4023913 | Beryllium               | 7440-41-7  | BMI <= 30          | 09-10 | 2.28E-09 | 8.12E-12 | 7.54E-08 |
| DTXSID4023913 | Beryllium               | 7440-41-7  | BMI > 30           | 09-10 | 2.83E-09 | 1.17E-11 | 9.96E-08 |
| DTXSID0047876 | Enterodiol              | 80226-00-2 | Total              | 09-10 | 6.81E-04 | 6.39E-04 | 7.27E-04 |
| DTXSID0047876 | Enterodiol              | 80226-00-2 | Male               | 09-10 | 6.43E-04 | 5.34E-04 | 7.81E-04 |
| DTXSID0047876 | Enterodiol              | 80226-00-2 | Female             | 09-10 | 7.20E-04 | 6.57E-04 | 7.90E-04 |
| DTXSID0047876 | Enterodiol              | 80226-00-2 | 6 - 11 years       | 09-10 | 9.93E-04 | 8.51E-04 | 1.16E-03 |
| DTXSID0047876 | Enterodiol              | 80226-00-2 | 12 - 19 years      | 09-10 | 6.29E-04 | 5.31E-04 | 7.50E-04 |
| DTXSID0047876 | Enterodiol              | 80226-00-2 | 20 - 65 years      | 09-10 | 6.75E-04 | 6.15E-04 | 7.42E-04 |
| DTXSID0047876 | Enterodiol              | 80226-00-2 | 66 years and older | 09-10 | 5.94E-04 | 5.13E-04 | 6.85E-04 |
| DTXSID0047876 | Enterodiol              | 80226-00-2 | ReproAgeFemale     | 09-10 | 7.68E-04 | 6.65E-04 | 8.87E-04 |
| DTXSID0047876 | Enterodiol              | 80226-00-2 | BMI <= 30          | 09-10 | 7.90E-04 | 7.34E-04 | 8.51E-04 |
| DTXSID0047876 | Enterodiol              | 80226-00-2 | BMI > 30           | 09-10 | 4.87E-04 | 4.32E-04 | 5.50E-04 |
| DTXSID2021105 | Pentachloronitrobenzene | 82-68-8    | Total              | 09-10 | 7.73E-08 | 2.42E-10 | 3.40E-06 |
| DTXSID2021105 | Pentachloronitrobenzene | 82-68-8    | Male               | 09-10 | 8.54E-08 | 3.32E-10 | 3.48E-06 |
| DTXSID2021105 | Pentachloronitrobenzene | 82-68-8    | Female             | 09-10 | 8.73E-08 | 2.70E-10 | 3.62E-06 |
| DTXSID2021105 | Pentachloronitrobenzene | 82-68-8    | 6 - 11 years       | 09-10 | 1.08E-07 | 3.84E-10 | 5.21E-06 |
| DTXSID2021105 | Pentachloronitrobenzene | 82-68-8    | 12 - 19 years      | 09-10 | 8.20E-08 | 2.06E-10 | 3.86E-06 |
| DTXSID2021105 | Pentachloronitrobenzene | 82-68-8    | 20 - 65 years      | 09-10 | 7.03E-08 | 2.86E-10 | 3.04E-06 |
| DTXSID2021105 | Pentachloronitrobenzene | 82-68-8    | 66 years and older | 09-10 | 1.05E-07 | 4.19E-10 | 4.15E-06 |
| DTXSID2021105 | Pentachloronitrobenzene | 82-68-8    | ReproAgeFemale     | 09-10 | 7.90E-08 | 2.17E-10 | 3.38E-06 |
| DTXSID2021105 | Pentachloronitrobenzene | 82-68-8    | BMI <= 30          | 09-10 | 9.06E-08 | 2.92E-10 | 4.06E-06 |
| DTXSID2021105 | Pentachloronitrobenzene | 82-68-8    | BMI > 30           | 09-10 | 7.65E-08 | 2.83E-10 | 3.06E-06 |
| DTXSID5025021 | Dicyclohexyl phthalate  | 84-61-7    | Total              | 09-10 | 8.37E-07 | 9.47E-08 | 2.92E-06 |
| DTXSID5025021 | Dicyclohexyl phthalate  | 84-61-7    | Male               | 09-10 | 1.01E-06 | 1.94E-07 | 3.06E-06 |
| DTXSID5025021 | Dicyclohexyl phthalate  | 84-61-7    | Female             | 09-10 | 8.51E-07 | 1.04E-07 | 2.92E-06 |
| DTXSID5025021 | Dicyclohexyl phthalate  | 84-61-7    | 6 - 11 years       | 09-10 | 1.62E-06 | 4.39E-07 | 3.94E-06 |
| DTXSID5025021 | Dicyclohexyl phthalate  | 84-61-7    | 12 - 19 years      | 09-10 | 8.94E-07 | 8.91E-08 | 3.35E-06 |
| DTXSID5025021 | Dicyclohexyl phthalate  | 84-61-7    | 20 - 65 years      | 09-10 | 9.25E-07 | 1.38E-07 | 3.11E-06 |
| DTXSID5025021 | Dicyclohexyl phthalate  | 84-61-7    | 66 years and older | 09-10 | 6.30E-07 | 4.61E-08 | 2.70E-06 |
| DTXSID5025021 | Dicyclohexyl phthalate  | 84-61-7    | ReproAgeFemale     | 09-10 | 7.62E-07 | 7.88E-08 | 2.86E-06 |
| DTXSID5025021 | Dicyclohexyl phthalate  | 84-61-7    | BMI <= 30          | 09-10 | 8.41E-07 | 9.63E-08 | 2.89E-06 |
| DTXSID5025021 | Dicyclohexyl phthalate  | 84-61-7    | BMI > 30           | 09-10 | 8.57E-07 | 1.21E-07 | 3.10E-06 |
| DTXSID7021106 | Pentachlorophenol       | 87-86-5    | Total              | 09-10 | 7.51E-08 | 2.41E-10 | 3.32E-06 |

|               |                                   |             |                    |       |          |          |          |
|---------------|-----------------------------------|-------------|--------------------|-------|----------|----------|----------|
| DTXSID7021106 | Pentachlorophenol                 | 87-86-5     | Male               | 09-10 | 6.95E-08 | 3.57E-10 | 2.76E-06 |
| DTXSID7021106 | Pentachlorophenol                 | 87-86-5     | Female             | 09-10 | 7.57E-08 | 2.76E-10 | 3.33E-06 |
| DTXSID7021106 | Pentachlorophenol                 | 87-86-5     | 6 - 11 years       | 09-10 | 9.49E-08 | 3.01E-10 | 5.20E-06 |
| DTXSID7021106 | Pentachlorophenol                 | 87-86-5     | 12 - 19 years      | 09-10 | 8.09E-08 | 2.93E-10 | 3.99E-06 |
| DTXSID7021106 | Pentachlorophenol                 | 87-86-5     | 20 - 65 years      | 09-10 | 6.42E-08 | 3.15E-10 | 2.62E-06 |
| DTXSID7021106 | Pentachlorophenol                 | 87-86-5     | 66 years and older | 09-10 | 1.04E-07 | 3.04E-10 | 3.61E-06 |
| DTXSID7021106 | Pentachlorophenol                 | 87-86-5     | ReproAgeFemale     | 09-10 | 7.30E-08 | 3.05E-10 | 3.07E-06 |
| DTXSID7021106 | Pentachlorophenol                 | 87-86-5     | BMI <= 30          | 09-10 | 8.02E-08 | 3.57E-10 | 3.31E-06 |
| DTXSID7021106 | Pentachlorophenol                 | 87-86-5     | BMI > 30           | 09-10 | 6.37E-08 | 2.65E-10 | 2.85E-06 |
| DTXSID2021151 | ortho-Phenylphenol                | 90-43-7     | Total              | 09-10 | 8.25E-07 | 7.35E-07 | 9.29E-07 |
| DTXSID2021151 | ortho-Phenylphenol                | 90-43-7     | Male               | 09-10 | 9.19E-07 | 7.33E-07 | 1.15E-06 |
| DTXSID2021151 | ortho-Phenylphenol                | 90-43-7     | Female             | 09-10 | 7.51E-07 | 5.68E-07 | 1.00E-06 |
| DTXSID2021151 | ortho-Phenylphenol                | 90-43-7     | 6 - 11 years       | 09-10 | 1.77E-06 | 1.10E-06 | 2.89E-06 |
| DTXSID2021151 | ortho-Phenylphenol                | 90-43-7     | 12 - 19 years      | 09-10 | 1.20E-06 | 9.69E-07 | 1.50E-06 |
| DTXSID2021151 | ortho-Phenylphenol                | 90-43-7     | 20 - 65 years      | 09-10 | 8.13E-07 | 6.71E-07 | 9.94E-07 |
| DTXSID2021151 | ortho-Phenylphenol                | 90-43-7     | 66 years and older | 09-10 | 8.32E-07 | 2.10E-07 | 1.87E-06 |
| DTXSID2021151 | ortho-Phenylphenol                | 90-43-7     | ReproAgeFemale     | 09-10 | 8.40E-07 | 6.69E-07 | 1.07E-06 |
| DTXSID2021151 | ortho-Phenylphenol                | 90-43-7     | BMI <= 30          | 09-10 | 8.95E-07 | 7.75E-07 | 1.04E-06 |
| DTXSID2021151 | ortho-Phenylphenol                | 90-43-7     | BMI > 30           | 09-10 | 7.71E-07 | 6.40E-07 | 9.30E-07 |
| DTXSID5021388 | 2,4,5-Trichlorophenoxyacetic acid | 93-76-5     | Total              | 09-10 | 4.57E-08 | 1.28E-09 | 2.68E-07 |
| DTXSID5021388 | 2,4,5-Trichlorophenoxyacetic acid | 93-76-5     | Male               | 09-10 | 3.83E-08 | 1.30E-09 | 2.37E-07 |
| DTXSID5021388 | 2,4,5-Trichlorophenoxyacetic acid | 93-76-5     | Female             | 09-10 | 5.71E-08 | 2.14E-09 | 2.92E-07 |
| DTXSID5021388 | 2,4,5-Trichlorophenoxyacetic acid | 93-76-5     | 6 - 11 years       | 09-10 | 8.87E-08 | 6.77E-09 | 3.98E-07 |
| DTXSID5021388 | 2,4,5-Trichlorophenoxyacetic acid | 93-76-5     | 12 - 19 years      | 09-10 | 1.22E-08 | 5.89E-11 | 2.33E-07 |
| DTXSID5021388 | 2,4,5-Trichlorophenoxyacetic acid | 93-76-5     | 20 - 65 years      | 09-10 | 5.04E-08 | 2.10E-09 | 2.83E-07 |
| DTXSID5021388 | 2,4,5-Trichlorophenoxyacetic acid | 93-76-5     | 66 years and older | 09-10 | 1.09E-08 | 6.77E-11 | 1.85E-07 |
| DTXSID5021388 | 2,4,5-Trichlorophenoxyacetic acid | 93-76-5     | ReproAgeFemale     | 09-10 | 6.16E-08 | 2.52E-09 | 3.32E-07 |
| DTXSID5021388 | 2,4,5-Trichlorophenoxyacetic acid | 93-76-5     | BMI <= 30          | 09-10 | 5.36E-08 | 1.82E-09 | 2.78E-07 |
| DTXSID5021388 | 2,4,5-Trichlorophenoxyacetic acid | 93-76-5     | BMI > 30           | 09-10 | 8.64E-09 | 5.11E-11 | 1.84E-07 |
| DTXSID4037580 | Omethoate                         | 1113-02-6   | Total              | 07-08 | 1.07E-08 | 2.83E-11 | 2.10E-07 |
| DTXSID4037580 | Omethoate                         | 1113-02-6   | Male               | 07-08 | 1.04E-08 | 2.27E-11 | 1.81E-07 |
| DTXSID4037580 | Omethoate                         | 1113-02-6   | Female             | 07-08 | 1.06E-08 | 1.78E-11 | 2.21E-07 |
| DTXSID4037580 | Omethoate                         | 1113-02-6   | 6 - 11 years       | 07-08 | 1.12E-08 | 1.47E-11 | 2.39E-07 |
| DTXSID4037580 | Omethoate                         | 1113-02-6   | 12 - 19 years      | 07-08 | 2.59E-08 | 5.77E-11 | 3.34E-07 |
| DTXSID4037580 | Omethoate                         | 1113-02-6   | 20 - 65 years      | 07-08 | 1.09E-08 | 2.33E-11 | 2.18E-07 |
| DTXSID4037580 | Omethoate                         | 1113-02-6   | 66 years and older | 07-08 | 3.06E-09 | 6.15E-12 | 1.37E-07 |
| DTXSID4037580 | Omethoate                         | 1113-02-6   | ReproAgeFemale     | 07-08 | 1.43E-08 | 3.05E-11 | 2.64E-07 |
| DTXSID4037580 | Omethoate                         | 1113-02-6   | BMI <= 30          | 07-08 | 1.07E-08 | 3.19E-11 | 2.05E-07 |
| DTXSID4037580 | Omethoate                         | 1113-02-6   | BMI > 30           | 07-08 | 3.05E-09 | 8.65E-12 | 1.20E-07 |
| DTXSID6034764 | Nicosulfuron                      | 111991-09-4 | Total              | 07-08 | 3.53E-08 | 1.37E-09 | 2.58E-07 |
| DTXSID6034764 | Nicosulfuron                      | 111991-09-4 | Male               | 07-08 | 3.81E-08 | 9.52E-10 | 2.71E-07 |
| DTXSID6034764 | Nicosulfuron                      | 111991-09-4 | Female             | 07-08 | 2.49E-08 | 6.00E-10 | 2.30E-07 |
| DTXSID6034764 | Nicosulfuron                      | 111991-09-4 | 6 - 11 years       | 07-08 | 4.34E-09 | 7.58E-12 | 1.51E-07 |
| DTXSID6034764 | Nicosulfuron                      | 111991-09-4 | 12 - 19 years      | 07-08 | 4.45E-09 | 7.87E-12 | 1.78E-07 |
| DTXSID6034764 | Nicosulfuron                      | 111991-09-4 | 20 - 65 years      | 07-08 | 4.54E-08 | 2.07E-09 | 3.15E-07 |
| DTXSID6034764 | Nicosulfuron                      | 111991-09-4 | 66 years and older | 07-08 | 3.62E-09 | 1.01E-11 | 1.37E-07 |
| DTXSID6034764 | Nicosulfuron                      | 111991-09-4 | ReproAgeFemale     | 07-08 | 3.60E-08 | 1.30E-09 | 3.12E-07 |

|               |              |             |                    |       |          |          |          |
|---------------|--------------|-------------|--------------------|-------|----------|----------|----------|
| DTXSID6034764 | Nicosulfuron | 111991-09-4 | BMI <= 30          | 07-08 | 3.50E-08 | 1.23E-09 | 2.60E-07 |
| DTXSID6034764 | Nicosulfuron | 111991-09-4 | BMI > 30           | 07-08 | 3.06E-08 | 8.49E-10 | 2.75E-07 |
| DTXSID1052741 | Propineb     | 12071-83-9  | Total              | 07-08 | 2.44E-07 | 8.35E-09 | 2.23E-06 |
| DTXSID1052741 | Propineb     | 12071-83-9  | Male               | 07-08 | 1.29E-07 | 1.42E-09 | 1.63E-06 |
| DTXSID1052741 | Propineb     | 12071-83-9  | Female             | 07-08 | 3.30E-07 | 1.61E-08 | 2.60E-06 |
| DTXSID1052741 | Propineb     | 12071-83-9  | 6 - 11 years       | 07-08 | 3.49E-07 | 1.33E-08 | 2.48E-06 |
| DTXSID1052741 | Propineb     | 12071-83-9  | 12 - 19 years      | 07-08 | 1.59E-08 | 2.20E-11 | 1.19E-06 |
| DTXSID1052741 | Propineb     | 12071-83-9  | 20 - 65 years      | 07-08 | 3.05E-07 | 1.33E-08 | 2.61E-06 |
| DTXSID1052741 | Propineb     | 12071-83-9  | 66 years and older | 07-08 | 2.31E-07 | 7.10E-09 | 2.51E-06 |
| DTXSID1052741 | Propineb     | 12071-83-9  | ReproAgeFemale     | 07-08 | 3.87E-07 | 2.14E-08 | 2.94E-06 |
| DTXSID1052741 | Propineb     | 12071-83-9  | BMI <= 30          | 07-08 | 2.61E-07 | 1.00E-08 | 2.31E-06 |
| DTXSID1052741 | Propineb     | 12071-83-9  | BMI > 30           | 07-08 | 2.49E-07 | 7.89E-09 | 2.49E-06 |
| DTXSID5021465 | Zineb        | 12122-67-7  | Total              | 07-08 | 3.10E-08 | 3.32E-11 | 1.97E-06 |
| DTXSID5021465 | Zineb        | 12122-67-7  | Male               | 07-08 | 2.70E-08 | 1.65E-11 | 2.10E-06 |
| DTXSID5021465 | Zineb        | 12122-67-7  | Female             | 07-08 | 3.01E-08 | 2.56E-11 | 2.12E-06 |
| DTXSID5021465 | Zineb        | 12122-67-7  | 6 - 11 years       | 07-08 | 3.83E-08 | 3.29E-11 | 2.50E-06 |
| DTXSID5021465 | Zineb        | 12122-67-7  | 12 - 19 years      | 07-08 | 3.56E-08 | 2.84E-11 | 2.54E-06 |
| DTXSID5021465 | Zineb        | 12122-67-7  | 20 - 65 years      | 07-08 | 3.51E-08 | 2.81E-11 | 2.05E-06 |
| DTXSID5021465 | Zineb        | 12122-67-7  | 66 years and older | 07-08 | 2.42E-08 | 2.02E-11 | 1.51E-06 |
| DTXSID5021465 | Zineb        | 12122-67-7  | ReproAgeFemale     | 07-08 | 3.10E-08 | 2.51E-11 | 2.28E-06 |
| DTXSID5021465 | Zineb        | 12122-67-7  | BMI <= 30          | 07-08 | 3.13E-08 | 1.99E-11 | 1.97E-06 |
| DTXSID5021465 | Zineb        | 12122-67-7  | BMI > 30           | 07-08 | 2.99E-08 | 2.25E-11 | 2.03E-06 |
| DTXSID1032642 | Rimsulfuron  | 122931-48-0 | Total              | 07-08 | 1.85E-09 | 5.30E-12 | 5.85E-08 |
| DTXSID1032642 | Rimsulfuron  | 122931-48-0 | Male               | 07-08 | 1.61E-09 | 3.71E-12 | 6.46E-08 |
| DTXSID1032642 | Rimsulfuron  | 122931-48-0 | Female             | 07-08 | 2.04E-09 | 5.09E-12 | 6.95E-08 |
| DTXSID1032642 | Rimsulfuron  | 122931-48-0 | 6 - 11 years       | 07-08 | 3.12E-09 | 9.27E-12 | 9.97E-08 |
| DTXSID1032642 | Rimsulfuron  | 122931-48-0 | 12 - 19 years      | 07-08 | 3.20E-09 | 9.11E-12 | 1.08E-07 |
| DTXSID1032642 | Rimsulfuron  | 122931-48-0 | 20 - 65 years      | 07-08 | 2.10E-09 | 6.79E-12 | 7.81E-08 |
| DTXSID1032642 | Rimsulfuron  | 122931-48-0 | 66 years and older | 07-08 | 2.54E-09 | 7.41E-12 | 9.20E-08 |
| DTXSID1032642 | Rimsulfuron  | 122931-48-0 | ReproAgeFemale     | 07-08 | 2.36E-09 | 5.87E-12 | 9.08E-08 |
| DTXSID1032642 | Rimsulfuron  | 122931-48-0 | BMI <= 30          | 07-08 | 2.18E-09 | 8.11E-12 | 6.45E-08 |
| DTXSID1032642 | Rimsulfuron  | 122931-48-0 | BMI > 30           | 07-08 | 2.34E-09 | 6.31E-12 | 8.65E-08 |
| DTXSID9020794 | Maneb        | 12427-38-2  | Total              | 07-08 | 2.86E-08 | 3.27E-11 | 1.85E-06 |
| DTXSID9020794 | Maneb        | 12427-38-2  | Male               | 07-08 | 2.08E-08 | 1.19E-11 | 1.69E-06 |
| DTXSID9020794 | Maneb        | 12427-38-2  | Female             | 07-08 | 2.76E-08 | 2.16E-11 | 2.01E-06 |
| DTXSID9020794 | Maneb        | 12427-38-2  | 6 - 11 years       | 07-08 | 3.80E-08 | 2.53E-11 | 2.46E-06 |
| DTXSID9020794 | Maneb        | 12427-38-2  | 12 - 19 years      | 07-08 | 3.25E-08 | 2.00E-11 | 2.37E-06 |
| DTXSID9020794 | Maneb        | 12427-38-2  | 20 - 65 years      | 07-08 | 3.06E-08 | 2.91E-11 | 2.01E-06 |
| DTXSID9020794 | Maneb        | 12427-38-2  | 66 years and older | 07-08 | 2.45E-08 | 2.10E-11 | 1.54E-06 |
| DTXSID9020794 | Maneb        | 12427-38-2  | ReproAgeFemale     | 07-08 | 2.97E-08 | 1.90E-11 | 2.15E-06 |
| DTXSID9020794 | Maneb        | 12427-38-2  | BMI <= 30          | 07-08 | 3.30E-08 | 3.53E-11 | 1.83E-06 |
| DTXSID9020794 | Maneb        | 12427-38-2  | BMI > 30           | 07-08 | 2.94E-08 | 2.12E-11 | 2.09E-06 |
| DTXSID3074947 | Halosulfuron | 135397-30-7 | Total              | 07-08 | 2.17E-09 | 8.48E-12 | 7.02E-08 |
| DTXSID3074947 | Halosulfuron | 135397-30-7 | Male               | 07-08 | 1.78E-09 | 3.70E-12 | 7.52E-08 |
| DTXSID3074947 | Halosulfuron | 135397-30-7 | Female             | 07-08 | 2.31E-09 | 4.78E-12 | 8.48E-08 |
| DTXSID3074947 | Halosulfuron | 135397-30-7 | 6 - 11 years       | 07-08 | 3.48E-09 | 7.27E-12 | 1.11E-07 |
| DTXSID3074947 | Halosulfuron | 135397-30-7 | 12 - 19 years      | 07-08 | 3.31E-09 | 7.30E-12 | 1.21E-07 |

|               |               |             |                    |       |          |          |          |
|---------------|---------------|-------------|--------------------|-------|----------|----------|----------|
| DTXSID3074947 | Halosulfuron  | 135397-30-7 | 20 - 65 years      | 07-08 | 2.53E-09 | 6.88E-12 | 8.43E-08 |
| DTXSID3074947 | Halosulfuron  | 135397-30-7 | 66 years and older | 07-08 | 2.96E-09 | 6.86E-12 | 1.07E-07 |
| DTXSID3074947 | Halosulfuron  | 135397-30-7 | ReproAgeFemale     | 07-08 | 2.69E-09 | 7.53E-12 | 1.11E-07 |
| DTXSID3074947 | Halosulfuron  | 135397-30-7 | BMI <= 30          | 07-08 | 2.38E-09 | 7.11E-12 | 7.19E-08 |
| DTXSID3074947 | Halosulfuron  | 135397-30-7 | BMI > 30           | 07-08 | 2.70E-09 | 5.79E-12 | 1.09E-07 |
| DTXSID4034940 | Sulfosulfuron | 141776-32-1 | Total              | 07-08 | 1.11E-08 | 2.79E-10 | 9.67E-08 |
| DTXSID4034940 | Sulfosulfuron | 141776-32-1 | Male               | 07-08 | 1.42E-09 | 3.13E-12 | 5.39E-08 |
| DTXSID4034940 | Sulfosulfuron | 141776-32-1 | Female             | 07-08 | 1.42E-08 | 4.19E-10 | 1.18E-07 |
| DTXSID4034940 | Sulfosulfuron | 141776-32-1 | 6 - 11 years       | 07-08 | 2.75E-09 | 5.41E-12 | 8.50E-08 |
| DTXSID4034940 | Sulfosulfuron | 141776-32-1 | 12 - 19 years      | 07-08 | 2.67E-09 | 7.21E-12 | 9.34E-08 |
| DTXSID4034940 | Sulfosulfuron | 141776-32-1 | 20 - 65 years      | 07-08 | 1.37E-08 | 3.07E-10 | 1.16E-07 |
| DTXSID4034940 | Sulfosulfuron | 141776-32-1 | 66 years and older | 07-08 | 2.38E-09 | 6.92E-12 | 8.05E-08 |
| DTXSID4034940 | Sulfosulfuron | 141776-32-1 | ReproAgeFemale     | 07-08 | 1.84E-08 | 6.53E-10 | 1.51E-07 |
| DTXSID4034940 | Sulfosulfuron | 141776-32-1 | BMI <= 30          | 07-08 | 1.17E-08 | 2.72E-10 | 1.01E-07 |
| DTXSID4034940 | Sulfosulfuron | 141776-32-1 | BMI > 30           | 07-08 | 2.23E-09 | 6.46E-12 | 7.67E-08 |
| DTXSID5020603 | Nabam         | 142-59-6    | Total              | 07-08 | 2.75E-08 | 2.63E-11 | 1.75E-06 |
| DTXSID5020603 | Nabam         | 142-59-6    | Male               | 07-08 | 2.44E-08 | 1.84E-11 | 1.87E-06 |
| DTXSID5020603 | Nabam         | 142-59-6    | Female             | 07-08 | 2.71E-08 | 2.94E-11 | 1.72E-06 |
| DTXSID5020603 | Nabam         | 142-59-6    | 6 - 11 years       | 07-08 | 3.42E-08 | 2.52E-11 | 2.27E-06 |
| DTXSID5020603 | Nabam         | 142-59-6    | 12 - 19 years      | 07-08 | 2.98E-08 | 2.33E-11 | 2.16E-06 |
| DTXSID5020603 | Nabam         | 142-59-6    | 20 - 65 years      | 07-08 | 3.02E-08 | 2.14E-11 | 1.99E-06 |
| DTXSID5020603 | Nabam         | 142-59-6    | 66 years and older | 07-08 | 2.49E-08 | 2.17E-11 | 1.46E-06 |
| DTXSID5020603 | Nabam         | 142-59-6    | ReproAgeFemale     | 07-08 | 3.33E-08 | 2.97E-11 | 2.12E-06 |
| DTXSID5020603 | Nabam         | 142-59-6    | BMI <= 30          | 07-08 | 2.79E-08 | 2.57E-11 | 1.83E-06 |
| DTXSID5020603 | Nabam         | 142-59-6    | BMI > 30           | 07-08 | 2.79E-08 | 2.14E-11 | 1.92E-06 |
| DTXSID4034364 | Oxasulfuron   | 144651-06-9 | Total              | 07-08 | 1.83E-09 | 4.67E-12 | 5.86E-08 |
| DTXSID4034364 | Oxasulfuron   | 144651-06-9 | Male               | 07-08 | 1.62E-09 | 3.27E-12 | 6.64E-08 |
| DTXSID4034364 | Oxasulfuron   | 144651-06-9 | Female             | 07-08 | 2.07E-09 | 6.02E-12 | 6.75E-08 |
| DTXSID4034364 | Oxasulfuron   | 144651-06-9 | 6 - 11 years       | 07-08 | 3.39E-09 | 7.72E-12 | 9.30E-08 |
| DTXSID4034364 | Oxasulfuron   | 144651-06-9 | 12 - 19 years      | 07-08 | 2.76E-09 | 7.46E-12 | 1.04E-07 |
| DTXSID4034364 | Oxasulfuron   | 144651-06-9 | 20 - 65 years      | 07-08 | 2.11E-09 | 5.20E-12 | 7.55E-08 |
| DTXSID4034364 | Oxasulfuron   | 144651-06-9 | 66 years and older | 07-08 | 2.71E-09 | 6.75E-12 | 9.65E-08 |
| DTXSID4034364 | Oxasulfuron   | 144651-06-9 | ReproAgeFemale     | 07-08 | 2.54E-09 | 7.05E-12 | 9.25E-08 |
| DTXSID4034364 | Oxasulfuron   | 144651-06-9 | BMI <= 30          | 07-08 | 2.09E-09 | 5.46E-12 | 6.68E-08 |
| DTXSID4034364 | Oxasulfuron   | 144651-06-9 | BMI > 30           | 07-08 | 2.60E-09 | 7.91E-12 | 8.96E-08 |
| DTXSID7034753 | Foramsulfuron | 173159-57-4 | Total              | 07-08 | 2.05E-09 | 8.12E-12 | 6.20E-08 |
| DTXSID7034753 | Foramsulfuron | 173159-57-4 | Male               | 07-08 | 1.84E-09 | 3.86E-12 | 6.93E-08 |
| DTXSID7034753 | Foramsulfuron | 173159-57-4 | Female             | 07-08 | 2.10E-09 | 6.27E-12 | 7.07E-08 |
| DTXSID7034753 | Foramsulfuron | 173159-57-4 | 6 - 11 years       | 07-08 | 2.81E-09 | 5.30E-12 | 1.04E-07 |
| DTXSID7034753 | Foramsulfuron | 173159-57-4 | 12 - 19 years      | 07-08 | 3.13E-09 | 8.45E-12 | 1.06E-07 |
| DTXSID7034753 | Foramsulfuron | 173159-57-4 | 20 - 65 years      | 07-08 | 2.30E-09 | 8.06E-12 | 7.27E-08 |
| DTXSID7034753 | Foramsulfuron | 173159-57-4 | 66 years and older | 07-08 | 2.78E-09 | 5.87E-12 | 9.04E-08 |
| DTXSID7034753 | Foramsulfuron | 173159-57-4 | ReproAgeFemale     | 07-08 | 2.68E-09 | 5.48E-12 | 9.97E-08 |
| DTXSID7034753 | Foramsulfuron | 173159-57-4 | BMI <= 30          | 07-08 | 2.11E-09 | 7.52E-12 | 6.40E-08 |
| DTXSID7034753 | Foramsulfuron | 173159-57-4 | BMI > 30           | 07-08 | 2.41E-09 | 6.49E-12 | 9.08E-08 |
| DTXSID9020112 | Atrazine      | 1912-24-9   | Total              | 07-08 | 5.88E-08 | 2.03E-09 | 7.21E-07 |
| DTXSID9020112 | Atrazine      | 1912-24-9   | Male               | 07-08 | 4.89E-08 | 5.94E-10 | 7.12E-07 |



|               |                     |             |                    |       |          |          |          |
|---------------|---------------------|-------------|--------------------|-------|----------|----------|----------|
| DTXSID9020112 | Atrazine            | 1912-24-9   | Female             | 07-08 | 7.57E-08 | 3.07E-09 | 8.49E-07 |
| DTXSID9020112 | Atrazine            | 1912-24-9   | 6 - 11 years       | 07-08 | 9.02E-09 | 1.05E-11 | 5.57E-07 |
| DTXSID9020112 | Atrazine            | 1912-24-9   | 12 - 19 years      | 07-08 | 7.48E-09 | 8.63E-12 | 6.07E-07 |
| DTXSID9020112 | Atrazine            | 1912-24-9   | 20 - 65 years      | 07-08 | 8.14E-08 | 2.67E-09 | 9.68E-07 |
| DTXSID9020112 | Atrazine            | 1912-24-9   | 66 years and older | 07-08 | 6.80E-09 | 9.97E-12 | 4.80E-07 |
| DTXSID9020112 | Atrazine            | 1912-24-9   | ReproAgeFemale     | 07-08 | 9.07E-08 | 3.35E-09 | 1.10E-06 |
| DTXSID9020112 | Atrazine            | 1912-24-9   | BMI <= 30          | 07-08 | 5.95E-08 | 1.91E-09 | 7.55E-07 |
| DTXSID9020112 | Atrazine            | 1912-24-9   | BMI > 30           | 07-08 | 7.68E-08 | 2.40E-09 | 1.01E-06 |
| DTXSID6034712 | Mesosulfuron-methyl | 208465-21-8 | Total              | 07-08 | 1.60E-09 | 4.41E-12 | 5.01E-08 |
| DTXSID6034712 | Mesosulfuron-methyl | 208465-21-8 | Male               | 07-08 | 1.55E-09 | 3.98E-12 | 5.25E-08 |
| DTXSID6034712 | Mesosulfuron-methyl | 208465-21-8 | Female             | 07-08 | 1.97E-09 | 4.99E-12 | 6.28E-08 |
| DTXSID6034712 | Mesosulfuron-methyl | 208465-21-8 | 6 - 11 years       | 07-08 | 2.82E-09 | 7.05E-12 | 8.45E-08 |
| DTXSID6034712 | Mesosulfuron-methyl | 208465-21-8 | 12 - 19 years      | 07-08 | 2.70E-09 | 6.61E-12 | 9.48E-08 |
| DTXSID6034712 | Mesosulfuron-methyl | 208465-21-8 | 20 - 65 years      | 07-08 | 2.04E-09 | 8.85E-12 | 6.21E-08 |
| DTXSID6034712 | Mesosulfuron-methyl | 208465-21-8 | 66 years and older | 07-08 | 2.41E-09 | 6.37E-12 | 8.42E-08 |
| DTXSID6034712 | Mesosulfuron-methyl | 208465-21-8 | ReproAgeFemale     | 07-08 | 2.48E-09 | 6.38E-12 | 8.72E-08 |
| DTXSID6034712 | Mesosulfuron-methyl | 208465-21-8 | BMI <= 30          | 07-08 | 1.67E-09 | 5.70E-12 | 5.37E-08 |
| DTXSID6034712 | Mesosulfuron-methyl | 208465-21-8 | BMI > 30           | 07-08 | 2.20E-09 | 6.10E-12 | 7.78E-08 |
| DTXSID8023846 | Acephate            | 30560-19-1  | Total              | 07-08 | 4.20E-07 | 4.38E-08 | 1.85E-06 |
| DTXSID8023846 | Acephate            | 30560-19-1  | Male               | 07-08 | 4.68E-07 | 3.74E-08 | 1.97E-06 |
| DTXSID8023846 | Acephate            | 30560-19-1  | Female             | 07-08 | 4.28E-07 | 4.59E-08 | 1.92E-06 |
| DTXSID8023846 | Acephate            | 30560-19-1  | 6 - 11 years       | 07-08 | 4.10E-07 | 3.02E-08 | 1.85E-06 |
| DTXSID8023846 | Acephate            | 30560-19-1  | 12 - 19 years      | 07-08 | 6.05E-07 | 7.36E-08 | 2.56E-06 |
| DTXSID8023846 | Acephate            | 30560-19-1  | 20 - 65 years      | 07-08 | 4.39E-07 | 4.17E-08 | 1.94E-06 |
| DTXSID8023846 | Acephate            | 30560-19-1  | 66 years and older | 07-08 | 6.60E-07 | 8.85E-08 | 2.45E-06 |
| DTXSID8023846 | Acephate            | 30560-19-1  | ReproAgeFemale     | 07-08 | 4.36E-07 | 4.82E-08 | 1.98E-06 |
| DTXSID8023846 | Acephate            | 30560-19-1  | BMI <= 30          | 07-08 | 4.35E-07 | 4.72E-08 | 1.90E-06 |
| DTXSID8023846 | Acephate            | 30560-19-1  | BMI > 30           | 07-08 | 4.48E-07 | 4.70E-08 | 2.03E-06 |
| DTXSID0058067 | Amobam              | 3566-10-7   | Total              | 07-08 | 3.01E-08 | 2.80E-11 | 1.75E-06 |
| DTXSID0058067 | Amobam              | 3566-10-7   | Male               | 07-08 | 2.29E-08 | 1.48E-11 | 1.78E-06 |
| DTXSID0058067 | Amobam              | 3566-10-7   | Female             | 07-08 | 2.60E-08 | 2.18E-11 | 1.77E-06 |
| DTXSID0058067 | Amobam              | 3566-10-7   | 6 - 11 years       | 07-08 | 3.38E-08 | 2.78E-11 | 2.15E-06 |
| DTXSID0058067 | Amobam              | 3566-10-7   | 12 - 19 years      | 07-08 | 3.18E-08 | 2.87E-11 | 2.21E-06 |
| DTXSID0058067 | Amobam              | 3566-10-7   | 20 - 65 years      | 07-08 | 2.70E-08 | 3.03E-11 | 1.84E-06 |
| DTXSID0058067 | Amobam              | 3566-10-7   | 66 years and older | 07-08 | 2.15E-08 | 1.42E-11 | 1.48E-06 |
| DTXSID0058067 | Amobam              | 3566-10-7   | ReproAgeFemale     | 07-08 | 2.90E-08 | 2.50E-11 | 2.06E-06 |
| DTXSID0058067 | Amobam              | 3566-10-7   | BMI <= 30          | 07-08 | 2.78E-08 | 3.35E-11 | 1.73E-06 |
| DTXSID0058067 | Amobam              | 3566-10-7   | BMI > 30           | 07-08 | 2.57E-08 | 2.08E-11 | 1.88E-06 |
| DTXSID7023980 | Chlorsulfuron       | 64902-72-3  | Total              | 07-08 | 1.00E-08 | 1.82E-10 | 9.30E-08 |
| DTXSID7023980 | Chlorsulfuron       | 64902-72-3  | Male               | 07-08 | 1.22E-08 | 2.00E-10 | 1.01E-07 |
| DTXSID7023980 | Chlorsulfuron       | 64902-72-3  | Female             | 07-08 | 1.78E-09 | 4.34E-12 | 6.04E-08 |
| DTXSID7023980 | Chlorsulfuron       | 64902-72-3  | 6 - 11 years       | 07-08 | 2.89E-09 | 7.32E-12 | 8.60E-08 |
| DTXSID7023980 | Chlorsulfuron       | 64902-72-3  | 12 - 19 years      | 07-08 | 2.52E-09 | 5.39E-12 | 9.17E-08 |
| DTXSID7023980 | Chlorsulfuron       | 64902-72-3  | 20 - 65 years      | 07-08 | 1.30E-08 | 2.63E-10 | 1.11E-07 |
| DTXSID7023980 | Chlorsulfuron       | 64902-72-3  | 66 years and older | 07-08 | 2.06E-09 | 6.88E-12 | 7.47E-08 |
| DTXSID7023980 | Chlorsulfuron       | 64902-72-3  | ReproAgeFemale     | 07-08 | 1.90E-09 | 3.74E-12 | 7.67E-08 |
| DTXSID7023980 | Chlorsulfuron       | 64902-72-3  | BMI <= 30          | 07-08 | 1.06E-08 | 2.16E-10 | 9.79E-08 |

|               |                       |            |                    |       |          |          |          |
|---------------|-----------------------|------------|--------------------|-------|----------|----------|----------|
| DTXSID7023980 | Chlorsulfuron         | 64902-72-3 | BMI > 30           | 07-08 | 1.88E-09 | 4.57E-12 | 7.01E-08 |
| DTXSID0034936 | Sulfometuron-methyl   | 74222-97-2 | Total              | 07-08 | 1.71E-09 | 7.11E-12 | 5.08E-08 |
| DTXSID0034936 | Sulfometuron-methyl   | 74222-97-2 | Male               | 07-08 | 1.54E-09 | 5.49E-12 | 5.50E-08 |
| DTXSID0034936 | Sulfometuron-methyl   | 74222-97-2 | Female             | 07-08 | 1.65E-09 | 4.92E-12 | 5.86E-08 |
| DTXSID0034936 | Sulfometuron-methyl   | 74222-97-2 | 6 - 11 years       | 07-08 | 2.70E-09 | 7.60E-12 | 8.16E-08 |
| DTXSID0034936 | Sulfometuron-methyl   | 74222-97-2 | 12 - 19 years      | 07-08 | 2.74E-09 | 5.18E-12 | 9.44E-08 |
| DTXSID0034936 | Sulfometuron-methyl   | 74222-97-2 | 20 - 65 years      | 07-08 | 2.02E-09 | 6.83E-12 | 6.08E-08 |
| DTXSID0034936 | Sulfometuron-methyl   | 74222-97-2 | 66 years and older | 07-08 | 2.19E-09 | 6.78E-12 | 7.30E-08 |
| DTXSID0034936 | Sulfometuron-methyl   | 74222-97-2 | ReproAgeFemale     | 07-08 | 2.19E-09 | 5.52E-12 | 8.23E-08 |
| DTXSID0034936 | Sulfometuron-methyl   | 74222-97-2 | BMI <= 30          | 07-08 | 1.69E-09 | 7.35E-12 | 5.53E-08 |
| DTXSID0034936 | Sulfometuron-methyl   | 74222-97-2 | BMI > 30           | 07-08 | 2.06E-09 | 5.79E-12 | 7.36E-08 |
| DTXSID6023864 | Metsulfuron-methyl    | 74223-64-6 | Total              | 07-08 | 1.03E-08 | 2.31E-10 | 9.43E-08 |
| DTXSID6023864 | Metsulfuron-methyl    | 74223-64-6 | Male               | 07-08 | 1.40E-09 | 3.67E-12 | 5.22E-08 |
| DTXSID6023864 | Metsulfuron-methyl    | 74223-64-6 | Female             | 07-08 | 1.31E-08 | 3.12E-10 | 1.14E-07 |
| DTXSID6023864 | Metsulfuron-methyl    | 74223-64-6 | 6 - 11 years       | 07-08 | 2.58E-09 | 6.52E-12 | 8.64E-08 |
| DTXSID6023864 | Metsulfuron-methyl    | 74223-64-6 | 12 - 19 years      | 07-08 | 2.45E-09 | 5.64E-12 | 9.29E-08 |
| DTXSID6023864 | Metsulfuron-methyl    | 74223-64-6 | 20 - 65 years      | 07-08 | 1.34E-08 | 2.75E-10 | 1.19E-07 |
| DTXSID6023864 | Metsulfuron-methyl    | 74223-64-6 | 66 years and older | 07-08 | 2.06E-09 | 4.53E-12 | 7.60E-08 |
| DTXSID6023864 | Metsulfuron-methyl    | 74223-64-6 | ReproAgeFemale     | 07-08 | 2.26E-09 | 7.09E-12 | 8.37E-08 |
| DTXSID6023864 | Metsulfuron-methyl    | 74223-64-6 | BMI <= 30          | 07-08 | 1.15E-08 | 2.57E-10 | 9.82E-08 |
| DTXSID6023864 | Metsulfuron-methyl    | 74223-64-6 | BMI > 30           | 07-08 | 2.16E-09 | 6.92E-12 | 7.19E-08 |
| DTXSID1024124 | Thifensulfuron methyl | 79277-27-3 | Total              | 07-08 | 2.38E-09 | 8.37E-12 | 8.06E-08 |
| DTXSID1024124 | Thifensulfuron methyl | 79277-27-3 | Male               | 07-08 | 1.99E-09 | 3.58E-12 | 7.99E-08 |
| DTXSID1024124 | Thifensulfuron methyl | 79277-27-3 | Female             | 07-08 | 2.57E-09 | 7.75E-12 | 9.14E-08 |
| DTXSID1024124 | Thifensulfuron methyl | 79277-27-3 | 6 - 11 years       | 07-08 | 4.07E-09 | 1.01E-11 | 1.26E-07 |
| DTXSID1024124 | Thifensulfuron methyl | 79277-27-3 | 12 - 19 years      | 07-08 | 3.73E-09 | 8.46E-12 | 1.42E-07 |
| DTXSID1024124 | Thifensulfuron methyl | 79277-27-3 | 20 - 65 years      | 07-08 | 2.76E-09 | 9.46E-12 | 9.17E-08 |
| DTXSID1024124 | Thifensulfuron methyl | 79277-27-3 | 66 years and older | 07-08 | 3.11E-09 | 8.58E-12 | 1.27E-07 |
| DTXSID1024124 | Thifensulfuron methyl | 79277-27-3 | ReproAgeFemale     | 07-08 | 3.04E-09 | 6.31E-12 | 1.31E-07 |
| DTXSID1024124 | Thifensulfuron methyl | 79277-27-3 | BMI <= 30          | 07-08 | 2.55E-09 | 9.51E-12 | 8.43E-08 |
| DTXSID1024124 | Thifensulfuron methyl | 79277-27-3 | BMI > 30           | 07-08 | 2.72E-09 | 4.92E-12 | 1.08E-07 |
| DTXSID0034695 | Mancozeb              | 8018-01-7  | Total              | 07-08 | 3.25E-07 | 3.15E-10 | 1.80E-05 |
| DTXSID0034695 | Mancozeb              | 8018-01-7  | Male               | 07-08 | 2.84E-07 | 2.10E-10 | 2.01E-05 |
| DTXSID0034695 | Mancozeb              | 8018-01-7  | Female             | 07-08 | 3.05E-07 | 2.58E-10 | 2.02E-05 |
| DTXSID0034695 | Mancozeb              | 8018-01-7  | 6 - 11 years       | 07-08 | 3.67E-07 | 3.76E-10 | 2.32E-05 |
| DTXSID0034695 | Mancozeb              | 8018-01-7  | 12 - 19 years      | 07-08 | 3.17E-07 | 2.27E-10 | 2.43E-05 |
| DTXSID0034695 | Mancozeb              | 8018-01-7  | 20 - 65 years      | 07-08 | 3.35E-07 | 3.39E-10 | 1.92E-05 |
| DTXSID0034695 | Mancozeb              | 8018-01-7  | 66 years and older | 07-08 | 2.45E-07 | 2.53E-10 | 1.55E-05 |
| DTXSID0034695 | Mancozeb              | 8018-01-7  | ReproAgeFemale     | 07-08 | 3.40E-07 | 3.21E-10 | 2.21E-05 |
| DTXSID0034695 | Mancozeb              | 8018-01-7  | BMI <= 30          | 07-08 | 3.27E-07 | 2.90E-10 | 1.91E-05 |
| DTXSID0034695 | Mancozeb              | 8018-01-7  | BMI > 30           | 07-08 | 2.91E-07 | 1.95E-10 | 2.06E-05 |
| DTXSID7024164 | Bensulfuron-methyl    | 83055-99-6 | Total              | 07-08 | 1.65E-09 | 5.40E-12 | 5.05E-08 |
| DTXSID7024164 | Bensulfuron-methyl    | 83055-99-6 | Male               | 07-08 | 1.47E-09 | 3.19E-12 | 5.33E-08 |
| DTXSID7024164 | Bensulfuron-methyl    | 83055-99-6 | Female             | 07-08 | 1.83E-09 | 5.28E-12 | 6.36E-08 |
| DTXSID7024164 | Bensulfuron-methyl    | 83055-99-6 | 6 - 11 years       | 07-08 | 2.69E-09 | 7.06E-12 | 8.32E-08 |
| DTXSID7024164 | Bensulfuron-methyl    | 83055-99-6 | 12 - 19 years      | 07-08 | 2.65E-09 | 6.38E-12 | 8.39E-08 |
| DTXSID7024164 | Bensulfuron-methyl    | 83055-99-6 | 20 - 65 years      | 07-08 | 1.80E-09 | 4.28E-12 | 6.13E-08 |

|               |                        |            |                    |       |          |          |          |
|---------------|------------------------|------------|--------------------|-------|----------|----------|----------|
| DTXSID7024164 | Bensulfuron-methyl     | 83055-99-6 | 66 years and older | 07-08 | 2.43E-09 | 1.00E-11 | 8.08E-08 |
| DTXSID7024164 | Bensulfuron-methyl     | 83055-99-6 | ReproAgeFemale     | 07-08 | 2.24E-09 | 4.81E-12 | 7.94E-08 |
| DTXSID7024164 | Bensulfuron-methyl     | 83055-99-6 | BMI <= 30          | 07-08 | 1.76E-09 | 6.77E-12 | 5.41E-08 |
| DTXSID7024164 | Bensulfuron-methyl     | 83055-99-6 | BMI > 30           | 07-08 | 2.13E-09 | 5.70E-12 | 7.52E-08 |
| DTXSID9034737 | Metiram                | 9006-42-2  | Total              | 07-08 | 3.00E-08 | 2.48E-11 | 1.97E-06 |
| DTXSID9034737 | Metiram                | 9006-42-2  | Male               | 07-08 | 2.74E-08 | 1.91E-11 | 1.99E-06 |
| DTXSID9034737 | Metiram                | 9006-42-2  | Female             | 07-08 | 3.04E-08 | 2.75E-11 | 2.05E-06 |
| DTXSID9034737 | Metiram                | 9006-42-2  | 6 - 11 years       | 07-08 | 3.30E-08 | 2.48E-11 | 2.28E-06 |
| DTXSID9034737 | Metiram                | 9006-42-2  | 12 - 19 years      | 07-08 | 3.27E-08 | 1.81E-11 | 2.44E-06 |
| DTXSID9034737 | Metiram                | 9006-42-2  | 20 - 65 years      | 07-08 | 2.99E-08 | 3.05E-11 | 2.11E-06 |
| DTXSID9034737 | Metiram                | 9006-42-2  | 66 years and older | 07-08 | 2.10E-08 | 1.80E-11 | 1.50E-06 |
| DTXSID9034737 | Metiram                | 9006-42-2  | ReproAgeFemale     | 07-08 | 3.24E-08 | 2.14E-11 | 2.22E-06 |
| DTXSID9034737 | Metiram                | 9006-42-2  | BMI <= 30          | 07-08 | 3.28E-08 | 3.71E-11 | 2.02E-06 |
| DTXSID9034737 | Metiram                | 9006-42-2  | BMI > 30           | 07-08 | 2.78E-08 | 2.26E-11 | 2.02E-06 |
| DTXSID9034868 | Prosulfuron            | 94125-34-5 | Total              | 07-08 | 1.03E-08 | 2.27E-10 | 8.73E-08 |
| DTXSID9034868 | Prosulfuron            | 94125-34-5 | Male               | 07-08 | 1.17E-08 | 2.08E-10 | 9.94E-08 |
| DTXSID9034868 | Prosulfuron            | 94125-34-5 | Female             | 07-08 | 1.85E-09 | 6.70E-12 | 5.90E-08 |
| DTXSID9034868 | Prosulfuron            | 94125-34-5 | 6 - 11 years       | 07-08 | 2.55E-08 | 1.16E-09 | 1.52E-07 |
| DTXSID9034868 | Prosulfuron            | 94125-34-5 | 12 - 19 years      | 07-08 | 2.51E-09 | 4.67E-12 | 8.15E-08 |
| DTXSID9034868 | Prosulfuron            | 94125-34-5 | 20 - 65 years      | 07-08 | 1.90E-09 | 5.80E-12 | 5.99E-08 |
| DTXSID9034868 | Prosulfuron            | 94125-34-5 | 66 years and older | 07-08 | 2.23E-09 | 7.69E-12 | 7.11E-08 |
| DTXSID9034868 | Prosulfuron            | 94125-34-5 | ReproAgeFemale     | 07-08 | 2.12E-09 | 7.49E-12 | 8.09E-08 |
| DTXSID9034868 | Prosulfuron            | 94125-34-5 | BMI <= 30          | 07-08 | 1.14E-08 | 2.56E-10 | 9.67E-08 |
| DTXSID9034868 | Prosulfuron            | 94125-34-5 | BMI > 30           | 07-08 | 2.08E-09 | 7.29E-12 | 7.41E-08 |
| DTXSID5020601 | Ethylene thiourea      | 96-45-7    | Total              | 07-08 | 1.13E-08 | 1.05E-11 | 6.83E-07 |
| DTXSID5020601 | Ethylene thiourea      | 96-45-7    | Male               | 07-08 | 1.03E-08 | 7.93E-12 | 7.94E-07 |
| DTXSID5020601 | Ethylene thiourea      | 96-45-7    | Female             | 07-08 | 1.14E-08 | 8.57E-12 | 8.07E-07 |
| DTXSID5020601 | Ethylene thiourea      | 96-45-7    | 6 - 11 years       | 07-08 | 1.51E-08 | 1.35E-11 | 9.08E-07 |
| DTXSID5020601 | Ethylene thiourea      | 96-45-7    | 12 - 19 years      | 07-08 | 1.34E-08 | 8.38E-12 | 9.27E-07 |
| DTXSID5020601 | Ethylene thiourea      | 96-45-7    | 20 - 65 years      | 07-08 | 1.16E-08 | 8.81E-12 | 7.72E-07 |
| DTXSID5020601 | Ethylene thiourea      | 96-45-7    | 66 years and older | 07-08 | 8.92E-09 | 9.31E-12 | 5.92E-07 |
| DTXSID5020601 | Ethylene thiourea      | 96-45-7    | ReproAgeFemale     | 07-08 | 1.28E-08 | 1.05E-11 | 8.40E-07 |
| DTXSID5020601 | Ethylene thiourea      | 96-45-7    | BMI <= 30          | 07-08 | 1.24E-08 | 8.05E-12 | 6.95E-07 |
| DTXSID5020601 | Ethylene thiourea      | 96-45-7    | BMI > 30           | 07-08 | 9.76E-09 | 7.19E-12 | 7.48E-07 |
| DTXSID9034573 | Ethametsulfuron-methyl | 97780-06-8 | Total              | 07-08 | 2.67E-09 | 8.88E-12 | 8.52E-08 |
| DTXSID9034573 | Ethametsulfuron-methyl | 97780-06-8 | Male               | 07-08 | 2.36E-09 | 4.75E-12 | 1.04E-07 |
| DTXSID9034573 | Ethametsulfuron-methyl | 97780-06-8 | Female             | 07-08 | 3.01E-09 | 8.81E-12 | 1.10E-07 |
| DTXSID9034573 | Ethametsulfuron-methyl | 97780-06-8 | 6 - 11 years       | 07-08 | 4.17E-09 | 9.60E-12 | 1.60E-07 |
| DTXSID9034573 | Ethametsulfuron-methyl | 97780-06-8 | 12 - 19 years      | 07-08 | 4.52E-09 | 9.47E-12 | 1.77E-07 |
| DTXSID9034573 | Ethametsulfuron-methyl | 97780-06-8 | 20 - 65 years      | 07-08 | 3.19E-09 | 6.60E-12 | 1.23E-07 |
| DTXSID9034573 | Ethametsulfuron-methyl | 97780-06-8 | 66 years and older | 07-08 | 3.59E-09 | 8.11E-12 | 1.57E-07 |
| DTXSID9034573 | Ethametsulfuron-methyl | 97780-06-8 | ReproAgeFemale     | 07-08 | 3.82E-09 | 9.64E-12 | 1.53E-07 |
| DTXSID9034573 | Ethametsulfuron-methyl | 97780-06-8 | BMI <= 30          | 07-08 | 2.90E-09 | 8.56E-12 | 1.08E-07 |
| DTXSID9034573 | Ethametsulfuron-methyl | 97780-06-8 | BMI > 30           | 07-08 | 3.60E-09 | 1.00E-11 | 1.35E-07 |
| DTXSID7021948 | Propoxur               | 114-26-1   | Total              | 03-04 | 3.80E-09 | 3.36E-12 | 3.65E-07 |
| DTXSID7021948 | Propoxur               | 114-26-1   | Male               | 03-04 | 4.14E-09 | 2.21E-12 | 4.27E-07 |
| DTXSID7021948 | Propoxur               | 114-26-1   | Female             | 03-04 | 3.16E-09 | 1.86E-12 | 4.20E-07 |

|               |              |            |                    |       |          |          |          |
|---------------|--------------|------------|--------------------|-------|----------|----------|----------|
| DTXSID7021948 | Propoxur     | 114-26-1   | 6 - 11 years       | 03-04 | 6.56E-09 | 3.29E-12 | 7.60E-07 |
| DTXSID7021948 | Propoxur     | 114-26-1   | 12 - 19 years      | 03-04 | 5.24E-09 | 2.63E-12 | 6.13E-07 |
| DTXSID7021948 | Propoxur     | 114-26-1   | 20 - 65 years      | 03-04 | 3.06E-09 | 8.50E-13 | 4.86E-07 |
| DTXSID7021948 | Propoxur     | 114-26-1   | 66 years and older | 03-04 | 8.00E-09 | 1.09E-11 | 5.95E-07 |
| DTXSID7021948 | Propoxur     | 114-26-1   | ReproAgeFemale     | 03-04 | 3.49E-09 | 1.21E-12 | 4.90E-07 |
| DTXSID7021948 | Propoxur     | 114-26-1   | BMI <= 30          | 03-04 | 3.76E-09 | 3.31E-12 | 3.96E-07 |
| DTXSID7021948 | Propoxur     | 114-26-1   | BMI > 30           | 03-04 | 4.42E-09 | 2.59E-12 | 5.83E-07 |
| DTXSID9020249 | Carbofuran   | 1563-66-2  | Total              | 03-04 | 1.57E-08 | 1.11E-11 | 1.00E-06 |
| DTXSID9020249 | Carbofuran   | 1563-66-2  | Male               | 03-04 | 1.59E-08 | 1.11E-11 | 1.12E-06 |
| DTXSID9020249 | Carbofuran   | 1563-66-2  | Female             | 03-04 | 1.01E-08 | 3.54E-12 | 9.22E-07 |
| DTXSID9020249 | Carbofuran   | 1563-66-2  | 6 - 11 years       | 03-04 | 1.70E-08 | 5.55E-12 | 1.33E-06 |
| DTXSID9020249 | Carbofuran   | 1563-66-2  | 12 - 19 years      | 03-04 | 1.79E-08 | 4.83E-12 | 1.51E-06 |
| DTXSID9020249 | Carbofuran   | 1563-66-2  | 20 - 65 years      | 03-04 | 9.62E-09 | 2.52E-12 | 8.88E-07 |
| DTXSID9020249 | Carbofuran   | 1563-66-2  | 66 years and older | 03-04 | 1.63E-08 | 1.53E-11 | 9.11E-07 |
| DTXSID9020249 | Carbofuran   | 1563-66-2  | ReproAgeFemale     | 03-04 | 1.07E-08 | 2.90E-12 | 1.05E-06 |
| DTXSID9020249 | Carbofuran   | 1563-66-2  | BMI <= 30          | 03-04 | 1.44E-08 | 9.05E-12 | 1.04E-06 |
| DTXSID9020249 | Carbofuran   | 1563-66-2  | BMI > 30           | 03-04 | 1.07E-08 | 4.05E-12 | 9.46E-07 |
| DTXSID5023950 | Carbosulfan  | 55285-14-8 | Total              | 03-04 | 2.56E-08 | 1.16E-11 | 1.73E-06 |
| DTXSID5023950 | Carbosulfan  | 55285-14-8 | Male               | 03-04 | 2.69E-08 | 1.33E-11 | 1.87E-06 |
| DTXSID5023950 | Carbosulfan  | 55285-14-8 | Female             | 03-04 | 1.89E-08 | 4.99E-12 | 1.62E-06 |
| DTXSID5023950 | Carbosulfan  | 55285-14-8 | 6 - 11 years       | 03-04 | 2.72E-08 | 8.86E-12 | 2.29E-06 |
| DTXSID5023950 | Carbosulfan  | 55285-14-8 | 12 - 19 years      | 03-04 | 3.35E-08 | 1.22E-11 | 2.43E-06 |
| DTXSID5023950 | Carbosulfan  | 55285-14-8 | 20 - 65 years      | 03-04 | 1.54E-08 | 5.62E-12 | 1.59E-06 |
| DTXSID5023950 | Carbosulfan  | 55285-14-8 | 66 years and older | 03-04 | 2.67E-08 | 1.64E-11 | 1.55E-06 |
| DTXSID5023950 | Carbosulfan  | 55285-14-8 | ReproAgeFemale     | 03-04 | 1.77E-08 | 5.41E-12 | 1.76E-06 |
| DTXSID5023950 | Carbosulfan  | 55285-14-8 | BMI <= 30          | 03-04 | 2.25E-08 | 1.33E-11 | 1.65E-06 |
| DTXSID5023950 | Carbosulfan  | 55285-14-8 | BMI > 30           | 03-04 | 1.95E-08 | 5.96E-12 | 1.58E-06 |
| DTXSID3052725 | Furathiocarb | 65907-30-4 | Total              | 03-04 | 2.71E-08 | 1.62E-11 | 1.79E-06 |
| DTXSID3052725 | Furathiocarb | 65907-30-4 | Male               | 03-04 | 2.53E-08 | 1.98E-11 | 1.81E-06 |
| DTXSID3052725 | Furathiocarb | 65907-30-4 | Female             | 03-04 | 1.84E-08 | 6.70E-12 | 1.63E-06 |
| DTXSID3052725 | Furathiocarb | 65907-30-4 | 6 - 11 years       | 03-04 | 3.28E-08 | 1.18E-11 | 2.32E-06 |
| DTXSID3052725 | Furathiocarb | 65907-30-4 | 12 - 19 years      | 03-04 | 2.75E-08 | 1.06E-11 | 2.45E-06 |
| DTXSID3052725 | Furathiocarb | 65907-30-4 | 20 - 65 years      | 03-04 | 1.59E-08 | 3.66E-12 | 1.63E-06 |
| DTXSID3052725 | Furathiocarb | 65907-30-4 | 66 years and older | 03-04 | 2.64E-08 | 1.70E-11 | 1.64E-06 |
| DTXSID3052725 | Furathiocarb | 65907-30-4 | ReproAgeFemale     | 03-04 | 1.75E-08 | 5.97E-12 | 1.91E-06 |
| DTXSID3052725 | Furathiocarb | 65907-30-4 | BMI <= 30          | 03-04 | 2.22E-08 | 1.37E-11 | 1.73E-06 |
| DTXSID3052725 | Furathiocarb | 65907-30-4 | BMI > 30           | 03-04 | 1.92E-08 | 7.44E-12 | 1.53E-06 |
| DTXSID2041622 | Benfuracarb  | 82560-54-1 | Total              | 03-04 | 2.76E-08 | 1.43E-11 | 1.76E-06 |
| DTXSID2041622 | Benfuracarb  | 82560-54-1 | Male               | 03-04 | 2.96E-08 | 1.77E-11 | 1.86E-06 |
| DTXSID2041622 | Benfuracarb  | 82560-54-1 | Female             | 03-04 | 1.94E-08 | 4.90E-12 | 1.75E-06 |
| DTXSID2041622 | Benfuracarb  | 82560-54-1 | 6 - 11 years       | 03-04 | 3.24E-08 | 7.39E-12 | 2.61E-06 |
| DTXSID2041622 | Benfuracarb  | 82560-54-1 | 12 - 19 years      | 03-04 | 3.38E-08 | 1.68E-11 | 2.64E-06 |
| DTXSID2041622 | Benfuracarb  | 82560-54-1 | 20 - 65 years      | 03-04 | 1.59E-08 | 3.56E-12 | 1.66E-06 |
| DTXSID2041622 | Benfuracarb  | 82560-54-1 | 66 years and older | 03-04 | 3.19E-08 | 2.34E-11 | 1.76E-06 |
| DTXSID2041622 | Benfuracarb  | 82560-54-1 | ReproAgeFemale     | 03-04 | 1.95E-08 | 8.60E-12 | 1.95E-06 |
| DTXSID2041622 | Benfuracarb  | 82560-54-1 | BMI <= 30          | 03-04 | 2.58E-08 | 1.17E-11 | 1.95E-06 |
| DTXSID2041622 | Benfuracarb  | 82560-54-1 | BMI > 30           | 03-04 | 2.09E-08 | 1.45E-11 | 1.80E-06 |

|               |             |            |                    |       |          |          |          |
|---------------|-------------|------------|--------------------|-------|----------|----------|----------|
| DTXSID8023848 | Acetochlor  | 34256-82-1 | Total              | 01-02 | 6.40E-08 | 4.31E-09 | 2.90E-07 |
| DTXSID8023848 | Acetochlor  | 34256-82-1 | Male               | 01-02 | 6.15E-08 | 4.13E-09 | 3.03E-07 |
| DTXSID8023848 | Acetochlor  | 34256-82-1 | Female             | 01-02 | 6.73E-08 | 4.77E-09 | 3.12E-07 |
| DTXSID8023848 | Acetochlor  | 34256-82-1 | 6 - 11 years       | 01-02 | 8.16E-08 | 8.34E-09 | 3.38E-07 |
| DTXSID8023848 | Acetochlor  | 34256-82-1 | 12 - 19 years      | 01-02 | 7.72E-08 | 7.05E-09 | 3.15E-07 |
| DTXSID8023848 | Acetochlor  | 34256-82-1 | 20 - 65 years      | 01-02 | 6.50E-08 | 4.33E-09 | 3.05E-07 |
| DTXSID8023848 | Acetochlor  | 34256-82-1 | 66 years and older | 01-02 | 6.06E-08 | 4.49E-09 | 3.11E-07 |
| DTXSID8023848 | Acetochlor  | 34256-82-1 | ReproAgeFemale     | 01-02 | 6.75E-08 | 2.77E-09 | 3.23E-07 |
| DTXSID8023848 | Acetochlor  | 34256-82-1 | BMI <= 30          | 01-02 | 7.04E-08 | 5.34E-09 | 3.24E-07 |
| DTXSID8023848 | Acetochlor  | 34256-82-1 | BMI > 30           | 01-02 | 3.37E-08 | 2.29E-09 | 2.78E-07 |
| DTXSID4022448 | Metolachlor | 51218-45-2 | Total              | 01-02 | 1.46E-07 | 1.33E-08 | 6.76E-07 |
| DTXSID4022448 | Metolachlor | 51218-45-2 | Male               | 01-02 | 1.75E-07 | 1.85E-08 | 7.29E-07 |
| DTXSID4022448 | Metolachlor | 51218-45-2 | Female             | 01-02 | 1.39E-07 | 1.14E-08 | 6.36E-07 |
| DTXSID4022448 | Metolachlor | 51218-45-2 | 6 - 11 years       | 01-02 | 1.64E-07 | 1.75E-08 | 7.19E-07 |
| DTXSID4022448 | Metolachlor | 51218-45-2 | 12 - 19 years      | 01-02 | 1.82E-07 | 1.83E-08 | 7.34E-07 |
| DTXSID4022448 | Metolachlor | 51218-45-2 | 20 - 65 years      | 01-02 | 1.67E-07 | 1.52E-08 | 7.55E-07 |
| DTXSID4022448 | Metolachlor | 51218-45-2 | 66 years and older | 01-02 | 1.61E-07 | 1.84E-08 | 7.35E-07 |
| DTXSID4022448 | Metolachlor | 51218-45-2 | ReproAgeFemale     | 01-02 | 1.33E-07 | 6.57E-09 | 6.27E-07 |
| DTXSID4022448 | Metolachlor | 51218-45-2 | BMI <= 30          | 01-02 | 1.45E-07 | 1.22E-08 | 6.64E-07 |
| DTXSID4022448 | Metolachlor | 51218-45-2 | BMI > 30           | 01-02 | 1.87E-07 | 2.38E-08 | 8.90E-07 |
| DTXSID1022265 | Alachlor    | 15972-60-8 | Total              | 99-00 | 2.23E-07 | 1.31E-07 | 3.43E-07 |
| DTXSID1022265 | Alachlor    | 15972-60-8 | Male               | 99-00 | 2.36E-07 | 1.47E-07 | 3.55E-07 |
| DTXSID1022265 | Alachlor    | 15972-60-8 | Female             | 99-00 | 2.11E-07 | 1.15E-07 | 3.34E-07 |
| DTXSID1022265 | Alachlor    | 15972-60-8 | 6 - 11 years       | 99-00 | 2.64E-07 | 1.70E-07 | 3.71E-07 |
| DTXSID1022265 | Alachlor    | 15972-60-8 | 12 - 19 years      | 99-00 | 2.07E-07 | 1.04E-07 | 3.42E-07 |
| DTXSID1022265 | Alachlor    | 15972-60-8 | 20 - 65 years      | 99-00 | 2.26E-07 | 1.34E-07 | 3.50E-07 |
| DTXSID1022265 | Alachlor    | 15972-60-8 | ReproAgeFemale     | 99-00 | 2.10E-07 | 1.07E-07 | 3.41E-07 |
| DTXSID1022265 | Alachlor    | 15972-60-8 | BMI <= 30          | 99-00 | 2.29E-07 | 1.38E-07 | 3.44E-07 |
| DTXSID1022265 | Alachlor    | 15972-60-8 | BMI > 30           | 99-00 | 2.06E-07 | 1.13E-07 | 3.49E-07 |

Table S5. Log<sub>2</sub> fold change in the median predicted exposure between each population group and the median exposure across all individuals for all parent chemicals.

| DTXSID         | CAS         | Name                       | ChemicalClass         | Males   | Females |
|----------------|-------------|----------------------------|-----------------------|---------|---------|
| DTXSID7021948  | 114-26-1    | Propoxur                   | Carbamate Pesticides  | 0.1237  | -0.2647 |
| DTXSID9020249  | 1563-66-2   | Carbofuran                 | Carbamate Pesticides  | 0.012   | -0.6432 |
| DTXSID5023950  | 55285-14-8  | Carbosulfan                | Carbamate Pesticides  | 0.0752  | -0.4395 |
| DTXSID3052725  | 65907-30-4  | Furathiocarb               | Carbamate Pesticides  | -0.0955 | -0.556  |
| DTXSID2041622  | 82560-54-1  | Benfuracarb                | Carbamate Pesticides  | 0.1009  | -0.51   |
| DTXSID5021411  | 115-96-8    | Tris(2-chloroethyl) phosph | Flame Retardant       | 0.1288  | -0.1188 |
| DTXSID3021986  | 126-73-8    | Tri-n-butyl phosphate (TB  | Flame Retardant       | 0.0237  | -0.0228 |
| DTXSID5026259  | 13674-84-5  | Tris(1-chloro-2-propyl) p  | Flame Retardant       | 0.0762  | -0.0685 |
| DTXSID9052686  | 183658-27-7 | 2-Ethylhexyl-2,3,4,5-tetr  | Flame Retardant       | 0.1073  | -0.1333 |
| DTXSID2020682  | 118-74-1    | Hexachlorobenzene          | Fungicides            | -0.0627 | -0.1474 |
| DTXSID7020685  | 319-85-7    | beta-Hexachlorocyclohexan  | Fungicides            | -0.1041 | 0.1174  |
| DTXSID2020686  | 58-89-9     | Lindane                    | Fungicides            | -0.1018 | -0.0607 |
| DTXSID7020687  | 608-73-1    | Hexachlorocyclohexane      | Fungicides            | -0.1177 | -0.0555 |
| DTXSID2021105  | 82-68-8     | Pentachloronitrobenzene    | Fungicides            | 0.1436  | 0.1764  |
| DTXSID7021106  | 87-86-5     | Pentachlorophenol          | Fungicides            | -0.1108 | 0.0117  |
| DTXSID2021151  | 90-43-7     | ortho-Phenylphenol         | Fungicides            | 0.154   | -0.1369 |
| DTXSID1052741  | 12071-83-9  | Propineb                   | Fungicides            | -0.9209 | 0.4379  |
| DTXSID5021465  | 12122-67-7  | Zineb                      | Fungicides            | -0.1953 | -0.0384 |
| DTXSID9020794  | 12427-38-2  | Maneb                      | Fungicides            | -0.4565 | -0.0488 |
| DTXSID5020603  | 142-59-6    | Nabam                      | Fungicides            | -0.1749 | -0.0199 |
| DTXSID0058067  | 3566-10-7   | Amobam                     | Fungicides            | -0.3984 | -0.214  |
| DTXSID0034695  | 8018-01-7   | Mancozeb                   | Fungicides            | -0.1945 | -0.0912 |
| DTXSID9034737  | 9006-42-2   | Metiram                    | Fungicides            | -0.1309 | 0.0188  |
| DTXSID5020601  | 96-45-7     | Ethylene thiourea          | Fungicides            | -0.138  | 0.0058  |
| DTXSID5021388  | 93-76-5     | 2,4,5-Trichlorophenoxyace  | Herbicides            | -0.2549 | 0.3224  |
| DTXSID9020112  | 1912-24-9   | Atrazine                   | Herbicides            | -0.2671 | 0.365   |
| DTXSID4022448  | 51218-45-2  | Metolachlor                | Herbicides            | 0.2556  | -0.0767 |
| DTXSID1022265  | 15972-60-8  | Alachlor                   | Herbicides            | 0.0833  | -0.0808 |
| DTXSID3037628  | 105650-23-5 | 2-Amino-1-methyl-6-phenyl  | Heterocyclic Amines   | 0.2537  | -0.2659 |
| DTXSID2021070  | 244-63-3    | 9H-Pyrido[3,4-b]indole (N  | Heterocyclic Amines   | 0.132   | -0.1292 |
| DTXSID7020001  | 26148-68-5  | 2-Amino-9H-pyrido[2,3-b]i  | Heterocyclic Amines   | 0.2883  | -0.2844 |
| DTXSID80197568 | 486-84-0    | 1-Methyl-9H-pyrido[3,4-b]  | Heterocyclic Amines   | 0.0335  | -0.0329 |
| DTXSID0043767  | 62450-06-0  | 3-Amino-1,4-dimethyl-5H-p  | Heterocyclic Amines   | 0.1581  | 0.019   |
| DTXSID5043768  | 62450-07-1  | 1-Methyl-3-amino-5H-pyrid  | Heterocyclic Amines   | 0.0433  | -0.1383 |
| DTXSID0020658  | 67730-10-3  | 2-Aminodipyrido[1,2-a:3'   | Heterocyclic Amines   | -0.4343 | 0.1994  |
| DTXSID5020657  | 67730-11-4  | 2-Amino-6-methyldipyrido[  | Heterocyclic Amines   | 0.0499  | -0.017  |
| DTXSID5043766  | 68006-83-7  | 2-Amino-3-methyl-9H-pyrio  | Heterocyclic Amines   | 0.2526  | -0.2417 |
| DTXSID4020745  | 76180-96-6  | 2-Amino-3-methyl-3H-imida  | Heterocyclic Amines   | 0.1394  | -0.0555 |
| DTXSID2021995  | 134-62-3    | N,N-Diethyl-3-methylbenza  | Insect Repellent      | 0.2375  | -0.1525 |
| DTXSID7074828  | 13464-58-9  | Arsenous acid              | Metals and Metalloids | 0.4338  | -0.4513 |
| DTXSID80873153 | 39895-81-3  | Arsenocholine              | Metals and Metalloids | 0.1899  | -0.0948 |
| DTXSID0052833  | 64436-13-1  | Arsenobetaine              | Metals and Metalloids | 0.2705  | -0.267  |
| DTXSID2024161  | 7439-92-1   | Lead                       | Metals and Metalloids | 0.1269  | -0.1197 |
| DTXSID2024169  | 7439-96-5   | Manganese                  | Metals and Metalloids | -0.2934 | 0.2491  |
| DTXSID1024172  | 7439-97-6   | Mercury                    | Metals and Metalloids | 0.0085  | 0.0003  |
| DTXSID1024207  | 7439-98-7   | Molybdenum                 | Metals and Metalloids | 0.1471  | -0.1422 |
| DTXSID3024312  | 7440-24-6   | Strontium                  | Metals and Metalloids | 0.1358  | -0.1272 |
| DTXSID2036035  | 7440-28-0   | Thallium                   | Metals and Metalloids | 0.0836  | -0.0809 |
| DTXSID1049801  | 7440-31-5   | Tin                        | Metals and Metalloids | -0.0639 | 0.0605  |
| DTXSID8052481  | 7440-33-7   | Tungsten                   | Metals and Metalloids | 0.1958  | -0.1825 |
| DTXSID5023879  | 7440-36-0   | Antimony                   | Metals and Metalloids | 0.1976  | -0.1896 |
| DTXSID8023894  | 7440-39-3   | Barium                     | Metals and Metalloids | 0.1562  | -0.1504 |
| DTXSID1023940  | 7440-43-9   | Cadmium                    | Metals and Metalloids | -0.0916 | 0.0881  |

| DTXSID        | CAS        | Name                   | ChemicalClass                  | Males   | Females |
|---------------|------------|------------------------|--------------------------------|---------|---------|
| DTXSID5036767 | 7440-46-2  | Cesium                 | Metals and Metalloids          | 0.0905  | -0.0872 |
| DTXSID1042522 | 7440-61-1  | Uranium                | Metals and Metalloids          | 0.1185  | -0.1044 |
| DTXSID7020508 | 75-60-5    | Dimethylarsinic acid   | Metals and Metalloids          | 0.0981  | -0.0971 |
| DTXSID1034341 | 7778-39-4  | Arsenic acid           | Metals and Metalloids          | 0.3084  | -0.0885 |
| DTXSID1021401 | 4964-14-1  | Trimethylarsine oxide  | Metals and Metalloids          | 0.0336  | 0.0817  |
| DTXSID8026195 | 108-70-3   | 1,3,5-Trichlorobenzene | Organochlorine Pesticides      | 0.0715  | -0.0005 |
| DTXSID0021965 | 120-82-1   | 1,2,4-Trichlorobenzene | Organochlorine Pesticides      | 0.0016  | 0.1336  |
| DTXSID2034885 | 299-84-3   | Fenchlorphos           | Organochlorine Pesticides      | -0.1414 | -0.0028 |
| DTXSID9038420 | 327-98-0   | Trichloronate          | Organochlorine Pesticides      | -0.0404 | -0.1212 |
| DTXSID7020970 | 1836-75-5  | Nitrofen               | Organophosphorus Insecticides  | 0.0844  | -0.0698 |
| DTXSID9059208 | 100-17-4   | 4-Nitroanisole         | Organophosphorus Insecticides  | -0.0505 | -0.2626 |
| DTXSID3024499 | 123-30-8   | 4-Aminophenol          | Organophosphorus Insecticides  | 0.1131  | -0.0749 |
| DTXSID0041775 | 1836-77-7  | Chlornitrofen          | Organophosphorus Insecticides  | -0.0517 | -0.1892 |
| DTXSID7022174 | 2104-64-5  | EPN                    | Organophosphorus Insecticides  | 0.0588  | 0.065   |
| DTXSID4020458 | 2921-88-2  | Chlorpyrifos           | Organophosphorus Insecticides  | -0.0896 | -0.0411 |
| DTXSID1020855 | 298-00-0   | Methyl parathion       | Organophosphorus Insecticides  | 0.2006  | 0.1501  |
| DTXSID9020407 | 333-41-5   | Diazinon               | Organophosphorus Insecticides  | 0.0012  | 0.0365  |
| DTXSID6032352 | 5598-13-0  | Chlorpyrifos-methyl    | Organophosphorus Insecticides  | 0.1384  | -0.1171 |
| DTXSID6037512 | 5598-52-7  | Fospirate              | Organophosphorus Insecticides  | 0.3326  | -0.1487 |
| DTXSID7021100 | 56-38-2    | Parathion              | Organophosphorus Insecticides  | 0.295   | -0.1453 |
| DTXSID3020964 | 98-95-3    | Nitrobenzene           | Organophosphorus Insecticides  | 0.0557  | -0.1149 |
| DTXSID4020791 | 121-75-5   | Malathion              | Organophosphorus Insecticides  | 0.0674  | 0.0182  |
| DTXSID4032613 | 122-14-5   | Fenitrothion           | Organophosphorus Insecticides  | -0.1017 | -0.0934 |
| DTXSID2022254 | 13071-79-9 | Terbufos               | Organophosphorus Insecticides  | 0.0911  | -0.1295 |
| DTXSID9023914 | 141-66-2   | Dicrotophos            | Organophosphorus Insecticides  | 0.1573  | -0.0086 |
| DTXSID1032648 | 22248-79-9 | Tetrachlorvinphos      | Organophosphorus Insecticides  | 0.0327  | -0.0369 |
| DTXSID0024266 | 29232-93-7 | Pirimiphos-methyl      | Organophosphorus Insecticides  | 0.0305  | -0.1173 |
| DTXSID4032459 | 298-02-2   | Phorate                | Organophosphorus Insecticides  | 0.1836  | -0.06   |
| DTXSID0022018 | 298-04-4   | Disulfoton             | Organophosphorus Insecticides  | -0.0373 | -0.1383 |
| DTXSID1024209 | 300-76-5   | Naled                  | Organophosphorus Insecticides  | 0.0424  | -0.089  |
| DTXSID8025541 | 301-12-2   | Oxydemeton-methyl      | Organophosphorus Insecticides  | -0.0229 | -0.0442 |
| DTXSID1032484 | 3383-96-8  | Temephos               | Organophosphorus Insecticides  | 0.0524  | -0.0403 |
| DTXSID7024328 | 3689-24-5  | Sulfotepp              | Organophosphorus Insecticides  | 0.0203  | -0.1887 |
| DTXSID8042058 | 42509-83-1 | Isazaphos-methyl       | Organophosphorus Insecticides  | 0.08    | -0.0981 |
| DTXSID0021389 | 52-68-6    | Trichlorfon            | Organophosphorus Insecticides  | 0.1706  | 0.0777  |
| DTXSID2032344 | 54593-83-8 | Chlorethoxyphos        | Organophosphorus Insecticides  | -0.096  | -0.0747 |
| DTXSID8020620 | 55-38-9    | Fenthion               | Organophosphorus Insecticides  | -0.0138 | -0.0506 |
| DTXSID2020347 | 56-72-4    | Coumaphos              | Organophosphorus Insecticides  | -0.2023 | -0.1957 |
| DTXSID2024086 | 563-12-2   | Ethion                 | Organophosphorus Insecticides  | -0.0184 | -0.0756 |
| DTXSID4052718 | 5871-17-0  | Phosphorothioic acid   | Organophosphorus Insecticides  | 0.0557  | -0.0488 |
| DTXSID7020479 | 60-51-5    | Dimethoate             | Organophosphorus Insecticides  | -0.1128 | -0.0818 |
| DTXSID5020449 | 62-73-7    | Dichlorvos             | Organophosphorus Insecticides  | 0.058   | -0.1524 |
| DTXSID5024261 | 732-11-6   | Phosmet                | Organophosphorus Insecticides  | -0.0415 | -0.0145 |
| DTXSID3020122 | 86-50-0    | Azinphos methyl        | Organophosphorus Insecticides  | -0.1442 | -0.1917 |
| DTXSID5020819 | 950-37-8   | Methidathion           | Organophosphorus Insecticides  | 0.0165  | 0.1177  |
| DTXSID4037580 | 1113-02-6  | Omethoate              | Organophosphorus Insecticides  | -0.0403 | -0.0223 |
| DTXSID8023846 | 30560-19-1 | Acephate               | Organophosphorus Insecticides  | 0.158   | 0.0282  |
| DTXSID5024217 | 14797-55-8 | Nitrate                | Perchlorate and Other Anions   | 0.1115  | -0.1085 |
| DTXSID6024252 | 14797-73-0 | Perchlorate            | Perchlorate and Other Anions   | 0.1255  | -0.1201 |
| DTXSID4026214 | 101-20-2   | Triclocarban           | Personal Care/Consumer Product | 0.0405  | -0.0081 |
| DTXSID1020431 | 106-46-7   | para-Dichlorobenzene   | Personal Care/Consumer Product | 0.1451  | -0.1481 |
| DTXSID9022528 | 120-47-8   | Ethyl paraben          | Personal Care/Consumer Product | -0.893  | 1.0544  |
| DTXSID3022405 | 131-57-7   | Benzophenone-3         | Personal Care/Consumer Product | -0.5114 | 0.4891  |
| DTXSID6058055 | 32861-85-1 | Chlomethoxyfen         | Personal Care/Consumer Product | 0.0794  | 0.0774  |
| DTXSID5032498 | 3380-34-5  | Triclosan              | Personal Care/Consumer Product | -0.0121 | 0.01    |

| DTXSID        | CAS         | Name                      | ChemicalClass                    | Males   | Females |
|---------------|-------------|---------------------------|----------------------------------|---------|---------|
| DTXSID8042349 | 34643-46-4  | Prothiofos                | Personal Care/Consumer Product   | 0.0176  | 0.0342  |
| DTXSID0058069 | 36519-00-3  | Phosdiphen                | Personal Care/Consumer Product   | 0.0574  | -0.0058 |
| DTXSID1040320 | 42576-02-3  | Bifenox                   | Personal Care/Consumer Product   | -0.0458 | -0.0117 |
| DTXSID6022056 | 541-73-1    | 1,3-dichlorobenzene       | Personal Care/Consumer Product   | 0.1401  | 0.082   |
| DTXSID9022445 | 620-92-8    | Bisphenol F               | Personal Care/Consumer Product   | 0.1479  | -0.1022 |
| DTXSID7020182 | 80-05-7     | Bisphenol A               | Personal Care/Consumer Product   | 0.1172  | -0.1099 |
| DTXSID3022409 | 80-09-1     | Bisphenol S               | Personal Care/Consumer Product   | 0.1075  | -0.0968 |
| DTXSID4022527 | 94-13-3     | n-propyl paraben          | Personal Care/Consumer Product   | -1.1217 | 1.0838  |
| DTXSID3020209 | 94-26-8     | Butyl paraben             | Personal Care/Consumer Product   | -0.6031 | 0.5826  |
| DTXSID0020442 | 94-75-7     | 2,4-Dichlorophenoxyacetic | Personal Care/Consumer Product   | 0.0939  | -0.1216 |
| DTXSID8040274 | 97-17-6     | Dichlofenthion            | Personal Care/Consumer Product   | 0.036   | -0.0728 |
| DTXSID4022529 | 99-76-3     | Methyl paraben            | Personal Care/Consumer Product   | -0.8292 | 0.7959  |
| DTXSID9022360 | 140-66-9    | 4-tert-Octylphenol        | Personal Care/Consumer Product   | 0.2124  | 0.0458  |
| DTXSID5020607 | 117-81-7    | Di-2-ethylhexyl phthalate | Phthalates                       | 0.0875  | -0.0854 |
| DTXSID1021956 | 117-84-0    | Di-n-octyl phthalate      | Phthalates                       | 0.1684  | -0.1544 |
| DTXSID4025082 | 26761-40-0  | Di-isodecyl phthalate     | Phthalates                       | 0.136   | -0.1291 |
| DTXSID4022521 | 28553-12-0  | Di-isononyl phthalate     | Phthalates                       | 0.1156  | -0.1386 |
| DTXSID7021780 | 84-66-2     | Diethyl phthalate         | Phthalates                       | -0.1234 | 0.1178  |
| DTXSID9022522 | 84-69-5     | Di-isobutyl phthalate     | Phthalates                       | 0.0463  | -0.044  |
| DTXSID2021781 | 84-74-2     | Dibutyl phthalate         | Phthalates                       | 0.1603  | 0.2103  |
| DTXSID3020205 | 85-68-7     | Benzylbutyl phthalate     | Phthalates                       | 0.0001  | -0.0517 |
| DTXSID3022455 | 131-11-3    | Dimethyl phthalate        | Phthalates                       | 0.1894  | -0.1927 |
| DTXSID5025021 | 84-61-7     | Dicyclohexyl phthalate    | Phthalates                       | 0.2747  | 0.0244  |
| DTXSID5022308 | 446-72-0    | Genistein                 | Phytoestrogens                   | 0.0296  | -0.0287 |
| DTXSID9022310 | 486-66-8    | Daidzein                  | Phytoestrogens                   | -0.0242 | 0.0149  |
| DTXSID0047876 | 80226-00-2  | Enterodiol                | Phytoestrogens                   | -0.0838 | 0.0797  |
| DTXSID3024289 | 129-00-0    | Pyrene                    | Polycyclic Aromatic Hydrocarbons | 0.1601  | -0.1527 |
| DTXSID8058118 | 52570-16-8  | Naproanilide              | Polycyclic Aromatic Hydrocarbons | 0.0454  | -0.048  |
| DTXSID9020247 | 63-25-2     | Carbaryl                  | Polycyclic Aromatic Hydrocarbons | 0.0531  | -0.0519 |
| DTXSID6024254 | 85-01-8     | Phenanthrene              | Polycyclic Aromatic Hydrocarbons | 0.1361  | -0.1293 |
| DTXSID8024105 | 86-73-7     | Fluorene                  | Polycyclic Aromatic Hydrocarbons | 0.2308  | -0.218  |
| DTXSID8020913 | 91-20-3     | Naphthalene               | Polycyclic Aromatic Hydrocarbons | 0.1477  | 0.0522  |
| DTXSID8020381 | 52918-63-5  | Deltamethrin              | Pyrethroids                      | -0.7059 | -0.0948 |
| DTXSID5035957 | 68359-37-5  | Cyfluthrin                | Pyrethroids                      | 0.0869  | -0.1918 |
| DTXSID6034764 | 111991-09-4 | Nicosulfuron              | Sulfonyl Urea Herbicides         | 0.1124  | -0.4998 |
| DTXSID3074947 | 135397-30-7 | Halosulfuron              | Sulfonyl Urea Herbicides         | -0.2838 | 0.086   |
| DTXSID4034940 | 141776-32-1 | Sulfosulfuron             | Sulfonyl Urea Herbicides         | -2.9706 | 0.3559  |
| DTXSID4034364 | 144651-06-9 | Oxasulfuron               | Sulfonyl Urea Herbicides         | -0.1744 | 0.1828  |
| DTXSID7034753 | 173159-57-4 | Foramsulfuron             | Sulfonyl Urea Herbicides         | -0.1567 | 0.0319  |
| DTXSID6034712 | 208465-21-8 | Mesosulfuron-methyl       | Sulfonyl Urea Herbicides         | -0.0399 | 0.3021  |
| DTXSID7023980 | 64902-72-3  | Chlorsulfuron             | Sulfonyl Urea Herbicides         | 0.2787  | -2.4964 |
| DTXSID0034936 | 74222-97-2  | Sulfometuron-methyl       | Sulfonyl Urea Herbicides         | -0.1478 | -0.0497 |
| DTXSID6023864 | 74223-64-6  | Metsulfuron-methyl        | Sulfonyl Urea Herbicides         | -2.8757 | 0.3449  |
| DTXSID1024124 | 79277-27-3  | Thifensulfuron methyl     | Sulfonyl Urea Herbicides         | -0.2592 | 0.1135  |
| DTXSID9034868 | 94125-34-5  | Prosulfuron               | Sulfonyl Urea Herbicides         | 0.1842  | -2.473  |
| DTXSID6021874 | 106-94-5    | 1-Bromopropane            | Volatile Organic Compounds       | 0.1451  | -0.1458 |
| DTXSID3020203 | 106-99-0    | 1,3-Butadiene             | Volatile Organic Compounds       | 0.1461  | -0.1401 |
| DTXSID5020023 | 107-02-8    | Acrolein                  | Volatile Organic Compounds       | 0.2517  | -0.2442 |
| DTXSID5020029 | 107-13-1    | Acrylonitrile             | Volatile Organic Compounds       | 0.471   | -0.4571 |
| DTXSID7021360 | 108-88-3    | Toulene                   | Volatile Organic Compounds       | 0.0973  | -0.0939 |
| DTXSID2021446 | 1330-20-7   | Xylene                    | Volatile Organic Compounds       | 0.1719  | -0.1703 |
| DTXSID6020515 | 68-12-2     | N,N-Dimethylformamide     | Volatile Organic Compounds       | 0.1328  | -0.1249 |
| DTXSID3039242 | 71-43-2     | Benzene                   | Volatile Organic Compounds       | 0.1802  | -0.1909 |
| DTXSID5021207 | 75-56-9     | Propylene oxide           | Volatile Organic Compounds       | 0.1806  | -0.1756 |
| DTXSID5020027 | 79-06-1     | Acrylamide                | Volatile Organic Compounds       | 0.1559  | -0.1485 |



| ReproAgeFemale | Age.3.5 | Age.6.11 | Age.12.19 | Age.20.65 | Age.>65 | BMI <= 30 | BMI > 30 |
|----------------|---------|----------|-----------|-----------|---------|-----------|----------|
| -0.1216        | NA      | 0.79     | 0.4651    | -0.3095   | 1.0758  | -0.0121   | 0.2186   |
| -0.5581        | NA      | 0.1079   | 0.1817    | -0.7107   | 0.0487  | -0.1269   | -0.5643  |
| -0.5333        | NA      | 0.0873   | 0.3912    | -0.7278   | 0.0648  | -0.1866   | -0.3939  |
| -0.6274        | NA      | 0.2756   | 0.0229    | -0.7658   | -0.0372 | -0.283    | -0.4937  |
| -0.5026        | NA      | 0.2328   | 0.2945    | -0.7945   | 0.2099  | -0.0963   | -0.4003  |
| -0.0808        | NA      | 1.2577   | 0.4033    | -0.1354   | -0.4997 | 0.1383    | -0.2921  |
| -0.0924        | NA      | 1.0503   | -0.0044   | -0.1129   | -0.0894 | 0.1898    | -0.394   |
| 0.1307         | NA      | 1.233    | -0.057    | -0.0373   | -0.4885 | 0.0997    | -0.1989  |
| 0.0126         | NA      | 0.8242   | 0.0267    | -0.0017   | -0.0437 | -0.067    | 0.2869   |
| -0.0772        | NA      | 0.2212   | -0.0982   | -0.2552   | 0.3732  | 0.0392    | -0.2644  |
| -0.1521        | NA      | 0.3639   | 0.0557    | -0.1923   | 0.5048  | 0.1102    | -0.1592  |
| -0.1489        | NA      | 0.3067   | -0.0619   | -0.2015   | 0.4177  | 0.2754    | -0.1395  |
| -0.1755        | NA      | 0.3155   | 0.0263    | -0.2401   | 0.3005  | -0.0269   | -0.133   |
| 0.032          | NA      | 0.4777   | 0.085     | -0.1375   | 0.4355  | 0.229     | -0.0138  |
| -0.0394        | NA      | 0.3391   | 0.109     | -0.2251   | 0.4677  | 0.0951    | -0.2369  |
| 0.0259         | NA      | 1.0973   | 0.5372    | -0.0216   | 0.0112  | 0.1159    | -0.0986  |
| 0.6664         | NA      | 0.518    | -3.9368   | 0.3222    | -0.0772 | 0.0967    | 0.0295   |
| 0.0041         | NA      | 0.3059   | 0.2006    | 0.1822    | -0.3556 | 0.0183    | -0.0498  |
| 0.0539         | NA      | 0.4091   | 0.185     | 0.0997    | -0.2248 | 0.2052    | 0.0428   |
| 0.2766         | NA      | 0.3158   | 0.1142    | 0.1333    | -0.1434 | 0.0201    | 0.0177   |
| -0.055         | NA      | 0.1671   | 0.0757    | -0.1575   | -0.4873 | -0.117    | -0.231   |
| 0.0692         | NA      | 0.1768   | -0.033    | 0.0476    | -0.4062 | 0.0118    | -0.1579  |
| 0.1139         | NA      | 0.141    | 0.124     | -0.0023   | -0.5137 | 0.1291    | -0.1072  |
| 0.1779         | NA      | 0.4142   | 0.2448    | 0.0316    | -0.3425 | 0.1291    | -0.2126  |
| 0.4311         | NA      | 0.9581   | -1.8987   | 0.143     | -2.0694 | 0.2298    | -2.4019  |
| 0.6254         | NA      | -2.7057  | -2.9742   | 0.4693    | -3.1135 | 0.0156    | 0.3848   |
| -0.1336        | NA      | 0.1683   | 0.3161    | 0.1888    | 0.1407  | -0.0147   | 0.3578   |
| -0.084         | NA      | 0.2443   | -0.1049   | 0.0238    | NA      | 0.0385    | -0.1099  |
| 0.1292         | NA      | -0.3787  | -0.0219   | 0.2161    | -0.7965 | 0.0181    | -0.0442  |
| -0.1855        | NA      | 0.6515   | -0.2713   | -0.0072   | -0.1325 | 0.1762    | -0.4039  |
| 0.3802         | NA      | -0.0086  | -0.5129   | 0.5884    | -1.461  | 0.2036    | -0.4104  |
| -0.1607        | NA      | 0.576    | -0.2245   | -0.0025   | -0.1483 | 0.2233    | -0.5087  |
| 0.3037         | NA      | 0.1679   | 0.5861    | 0.2554    | -0.208  | 0.1421    | 0.2112   |
| 0.1829         | NA      | -0.5963  | 0.5279    | 0.1513    | -0.3015 | 0.0187    | 0.0127   |
| 0.335          | NA      | 0.6799   | -1.9437   | 0.2355    | 0.2087  | -0.0243   | 0.2662   |
| 0.1308         | NA      | 0.5039   | 0.345     | 0.078     | -0.2704 | 0.0056    | 0.0629   |
| 0.174          | NA      | -0.996   | -0.2499   | 0.4754    | -0.2062 | 0.0357    | 0.0409   |
| 0.1903         | NA      | 0.337    | 0.2781    | 0.0701    | 0.2611  | -0.0105   | 0.2778   |
| -0.0978        | NA      | 0.5341   | 0.3768    | 0.0926    | 0.0875  | 0.1098    | 0.0586   |
| 0.014          | 1.3622  | 0.8509   | 0.7281    | 0.0413    | -1.524  | 0.3567    | -0.6556  |
| 0.0011         | 0.1384  | 0.1386   | 0.1532    | 0.1373    | 0.2823  | -0.0641   | 0.2687   |
| -0.5506        | -0.0609 | 0.1772   | -1.2036   | 0.1875    | 0.577   | 0.1626    | -0.2791  |
| -0.3614        | 1.3995  | 0.4572   | -0.6762   | -0.052    | 0.1787  | 0.1982    | -0.4076  |
| 0.129          | 1.8938  | 1.0114   | 0.2728    | -0.0787   | -0.2682 | 0.2838    | -0.4735  |
| 0.0209         | -0.6401 | -1.0461  | -1.3713   | 0.2806    | 0.0092  | 0.0135    | -0.0399  |
| -0.2484        | 1.957   | 1.2592   | 0.3056    | -0.2005   | -0.5277 | 0.2026    | -0.4178  |
| -0.097         | 0.8708  | 0.4009   | -0.0726   | 0.0292    | -0.5286 | 0.1906    | -0.3903  |
| 0.0467         | 1.512   | 0.7305   | 0.0074    | -0.0147   | -0.7149 | 0.1807    | -0.3712  |
| -0.2948        | 2.7723  | 1.4368   | -0.133    | -0.3323   | 0.1814  | 0.1717    | -0.3471  |
| -0.1649        | 2.3068  | 1.5624   | 0.5362    | -0.2232   | -0.7916 | 0.2041    | -0.4051  |
| -0.1253        | 1.6639  | 1.0505   | 0.2535    | -0.1064   | -0.62   | 0.1613    | -0.3162  |
| -0.1041        | 1.2728  | 0.778    | 0.1957    | -0.0541   | -0.6744 | 0.1447    | -0.2976  |
| -0.0277        | -1.4933 | -1.4379  | -1.4068   | 0.2891    | 0.7902  | -0.059    | 0.0984   |

| ReproAgeFemale | Age.3.5 | Age.6.11 | Age.12.19 | Age.20.65 | Age.>65 | BMI <= 30 | BMI > 30 |
|----------------|---------|----------|-----------|-----------|---------|-----------|----------|
| -0.08          | 1.4292  | 0.6131   | -0.1899   | -0.0472   | -0.324  | 0.1737    | -0.3579  |
| -0.1252        | 1.1763  | 0.447    | 0.0874    | -0.0563   | -0.2494 | 0.1441    | -0.2831  |
| -0.1264        | 1.3543  | 0.6689   | -0.1725   | -0.0166   | -0.3542 | 0.2031    | -0.3662  |
| -0.0872        | 0.9552  | 0.7146   | 0.2286    | 0.0992    | 0.0326  | 0.1201    | -0.031   |
| 0.0607         | NA      | 0.8329   | 0.5038    | -0.1247   | 0.1518  | 0.1033    | -0.0239  |
| -0.0693        | NA      | 0.9118   | 0.1208    | -0.1884   | -0.2609 | 0.1628    | -0.3939  |
| -0.202         | NA      | 0.3186   | -0.03     | -0.1246   | 0.5659  | 0.1499    | -0.1224  |
| -0.1715        | NA      | 0.2276   | -0.0567   | -0.179    | 0.4164  | 0.048     | -0.0892  |
| -0.1457        | NA      | 0.3516   | -0.1357   | -0.1582   | 0.4929  | 0.0977    | -0.2452  |
| 0.0391         | 1.3811  | 0.8531   | 0.2258    | -0.0581   | 0.0154  | 0.1343    | -0.0395  |
| 0.0195         | NA      | 0.757    | -0.2519   | -0.0215   | -0.2289 | 0.0052    | -0.3921  |
| -0.198         | NA      | 0.7936   | -0.2032   | -0.1025   | 0.1226  | 0.014     | -0.2628  |
| -0.095         | NA      | 0.6629   | -0.3011   | -0.1007   | -0.1751 | 0.167     | -0.272   |
| 0.0954         | NA      | 0.9738   | 0.1016    | 0.0529    | -0.1233 | 0.1293    | -0.2078  |
| -0.2026        | NA      | 0.9903   | -0.0384   | 0.0213    | -0.0373 | 0.2577    | -0.3029  |
| -0.0137        | NA      | 0.7439   | 0.1313    | -0.0127   | -0.0332 | 0.283     | -0.1029  |
| 0.1066         | NA      | 1.2153   | 0.1857    | 0.0966    | 1.3107  | 0.2155    | -0.3326  |
| -0.2994        | NA      | 0.9899   | -0.023    | 0.0783    | -0.1824 | 0.0748    | -0.364   |
| -0.025         | NA      | 0.8224   | 0.0035    | -0.027    | -0.1959 | 0.0959    | -0.1495  |
| 0.0055         | NA      | 0.8983   | 0.1339    | -0.0172   | 0.0681  | 0.219     | -0.4662  |
| 0.0414         | NA      | 0.8571   | -0.1163   | 0.0021    | -0.0552 | 0.0996    | -0.3725  |
| -0.1745        | NA      | 0.8213   | -0.1782   | -0.0538   | 0.1062  | 0.2555    | -0.5194  |
| -0.0494        | NA      | 0.7872   | -0.2153   | -0.1931   | 0.122   | 0.0856    | -0.6108  |
| 0.0825         | NA      | 0.312    | 0.3555    | -0.0207   | -0.1049 | -0.0274   | -0.1496  |
| -0.0602        | NA      | 0.8534   | 0.1047    | -0.0422   | -0.1809 | 0.2139    | -0.4386  |
| -0.0506        | NA      | 0.9834   | 0.2065    | -0.0842   | -0.1953 | 0.1797    | -0.4182  |
| -0.1513        | NA      | 0.6408   | -0.1646   | -0.1509   | 0.0665  | 0.2972    | -0.7235  |
| 0.0589         | NA      | 0.3663   | 0.4141    | 0.1051    | -0.0101 | 0.1253    | -0.0147  |
| 0.0069         | NA      | 0.3085   | 0.2682    | -0.0366   | -0.1923 | -0.0683   | -0.1058  |
| -0.132         | NA      | 0.8135   | 0.0223    | -0.0878   | -0.2951 | 0.3078    | -0.5352  |
| -0.2637        | NA      | 0.7712   | -0.0837   | -0.213    | 0.1019  | 0.1594    | -0.7046  |
| -0.0251        | NA      | 0.7169   | -0.0344   | 0.0187    | 0.1859  | 0.2668    | -0.5161  |
| -0.2753        | NA      | 0.7776   | -0.0917   | -0.22     | -0.3    | 0.1404    | -0.6119  |
| -0.1954        | NA      | 0.7619   | -0.0579   | -0.1025   | 0.1775  | 0.208     | -0.5395  |
| -0.1116        | NA      | 1.0538   | 0.0943    | 0.0213    | -0.0464 | 0.2597    | -0.4043  |
| -0.3435        | NA      | 0.6333   | -0.1528   | -0.1539   | -0.3546 | 0.0922    | -0.5924  |
| -0.1639        | NA      | 0.8331   | -0.0724   | -0.0963   | -0.0151 | 0.0598    | -0.666   |
| -0.356         | NA      | 0.8452   | -0.1971   | -0.1599   | -0.384  | -0.0263   | -0.8165  |
| -0.0376        | NA      | 0.4427   | 0.3863    | 0.0054    | -0.1644 | 0.1182    | -0.123   |
| -0.1272        | NA      | 0.8592   | -0.0694   | -0.1167   | 0.1219  | 0.2614    | -0.5858  |
| -0.143         | NA      | 0.85     | -0.1684   | -0.0582   | -0.0378 | 0.2118    | -0.4418  |
| -0.2037        | NA      | 0.6285   | 0.0515    | -0.0638   | -0.205  | 0.2051    | -0.6475  |
| -0.2553        | NA      | 0.8597   | -0.0536   | -0.2079   | -0.024  | 0.0629    | -0.454   |
| -0.1618        | NA      | 0.7834   | -0.0901   | -0.1285   | -0.1302 | 0.1256    | -0.6654  |
| -0.152         | NA      | 0.7742   | 0.0109    | -0.0917   | 0.0449  | 0.19      | -0.4519  |
| 0.4164         | NA      | 0.0599   | 1.2738    | 0.0308    | -1.8098 | -0.0075   | -1.8135  |
| 0.0563         | NA      | -0.0332  | 0.5282    | 0.0661    | 0.6535  | 0.0509    | 0.0935   |
| -0.0068        | 1.6581  | 0.8013   | 0.0413    | -0.0428   | -0.69   | 0.1942    | -0.3983  |
| -0.1391        | 2.0741  | 1.0403   | -0.0536   | -0.1334   | -0.4138 | 0.2107    | -0.4342  |
| -0.0799        | -0.0503 | 0.1042   | -0.0495   | 0.0019    | 0.352   | -0.0853   | 0.2011   |
| 0.0731         | 1.4652  | 0.9531   | 0.5532    | -0.1198   | -0.5683 | 0.0475    | -0.0927  |
| 1.3552         | 0.8177  | -0.5901  | -0.9181   | 0.4672    | 0.4574  | 0.4411    | -0.8578  |
| 0.644          | 1.5135  | 0.6732   | -0.4663   | 0.0696    | -0.4995 | 0.1997    | -0.4075  |
| 0.0788         | 1.4614  | 0.8644   | 0.2743    | -0.1099   | -0.219  | 0.1036    | -0.0243  |
| 0.0586         | 0.8849  | 0.4052   | -0.4212   | 0.0294    | -0.0497 | 0.1508    | -0.2885  |

| ReproAgeFemale | Age.3.5 | Age.6.11 | Age.12.19 | Age.20.65 | Age.>65 | BMI <= 30 | BMI > 30 |
|----------------|---------|----------|-----------|-----------|---------|-----------|----------|
| -0.0406        | 1.3305  | 0.7676   | 0.2716    | -0.0872   | -0.297  | -0.0362   | -0.2793  |
| 0.1436         | 1.4572  | 0.8284   | 0.3152    | -0.0371   | -0.158  | 0.2144    | -0.0237  |
| -0.0897        | 1.444   | 0.702    | 0.1517    | 0.0016    | -0.262  | -0.0049   | -0.2735  |
| 0.1206         | 1.4979  | 0.8781   | 0.2409    | -0.0033   | -0.1313 | 0.0106    | -0.2429  |
| 0.1373         | 0.0151  | 0.0866   | 0.1274    | 0.1918    | -0.6003 | -0.0054   | 0.0293   |
| -0.0893        | 1.887   | 0.6785   | -0.1101   | 0.042     | -0.6048 | 0.0765    | -0.1504  |
| 0.0303         | 1.5302  | 0.2492   | -0.5963   | 0.196     | -0.6164 | 0.0212    | -0.0431  |
| 1.1652         | 1.3451  | -0.4043  | -0.6985   | 0.1421    | 0.0555  | 0.1262    | -0.2499  |
| 0.7591         | 0.0615  | 0.0009   | -0.0875   | 0.2252    | 0.0132  | 0.0436    | 0.0767   |
| -0.0142        | 1.3204  | 0.7459   | 0.2401    | -0.1483   | -0.2003 | -0.003    | -0.2011  |
| 0.0193         | 1.3826  | 0.822    | 0.3396    | -0.0812   | -0.2002 | 0.1283    | -0.2531  |
| 0.7866         | 1.2253  | -0.2992  | -0.6617   | 0.1441    | -0.0539 | 0.135     | -0.2687  |
| 0.0782         | NA      | 0.6316   | 0.3608    | 0.0404    | 0.009   | 0.0637    | 0.1689   |
| -0.1004        | 2.3843  | 1.2528   | -0.2205   | -0.1114   | -0.5517 | 0.1642    | -0.3372  |
| -0.226         | 2.4328  | 1.3306   | -0.0088   | -0.1398   | -0.6031 | 0.0984    | -0.1892  |
| -0.1572        | 1.9521  | 0.9476   | 0.0391    | -0.1131   | -0.4884 | 0.1042    | -0.2144  |
| -0.0869        | 1.8213  | 0.9874   | 0.03      | -0.0743   | -0.6464 | 0.0666    | -0.1393  |
| 0.1198         | 0.9069  | 0.1067   | -0.215    | 0.0018    | -0.088  | 0.0617    | -0.1204  |
| -0.0049        | 1.8556  | 0.9801   | 0.0235    | -0.0883   | -0.6115 | 0.1316    | -0.2723  |
| 0.1772         | 1.2021  | 0.5884   | -0.1107   | -0.0155   | 0.3786  | 0.2998    | 0.0372   |
| -0.1357        | 2.2863  | 1.5415   | 0.0537    | -0.2085   | -0.707  | 0.1123    | -0.3211  |
| -0.0402        | NA      | 1.7703   | 0.3281    | -0.0853   | -0.8626 | 0.1659    | -0.3792  |
| -0.1341        | NA      | 0.9577   | 0.0952    | 0.1451    | -0.4082 | 0.008     | 0.0349   |
| -0.1607        | NA      | 1.0825   | 0.2248    | -0.111    | -0.3988 | 0.2196    | -0.5077  |
| -0.1039        | NA      | 1.2509   | 0.403     | -0.1548   | -0.465  | 0.202     | -0.4713  |
| 0.1729         | NA      | 0.543    | -0.1145   | -0.0137   | -0.1971 | 0.2128    | -0.4847  |
| 0.2152         | 1.6006  | 0.841    | 0.0107    | 0.0975    | -1.193  | 0.1451    | -0.2728  |
| 0.2808         | 0.9828  | 0.2554   | -0.0516   | 0.103     | -0.8981 | 0.044     | -0.0924  |
| -0.0709        | 0.6846  | -0.1612  | -0.7044   | 0.0563    | 0.0021  | 0.1144    | -0.1479  |
| -0.0009        | 0.915   | 0.2877   | -0.2705   | 0.0591    | -0.4436 | 0.0768    | -0.161   |
| 0.0535         | 0.7226  | 0.0851   | -0.3908   | 0.1849    | -0.7747 | 0.101     | -0.2051  |
| -0.1298        | 1.0134  | 0.2248   | -0.4476   | 0.3461    | 0.1706  | 0.0309    | 0.0347   |
| -0.1482        | NA      | -0.1402  | -1.3805   | -0.6579   | -1.1523 | 0.1229    | -1.4895  |
| -0.2806        | NA      | 0.6255   | 0.0123    | -0.1311   | 0.1818  | -0.0325   | -0.0109  |
| 0.032          | NA      | -3.0224  | -2.9856   | 0.3643    | -3.2855 | -0.0117   | -0.2029  |
| 0.3072         | NA      | 0.6799   | 0.6057    | 0.2221    | 0.4472  | 0.1297    | 0.3119   |
| 0.727          | NA      | -2.0153  | -2.0579   | 0.2994    | -2.2249 | 0.0784    | -2.3169  |
| 0.4733         | NA      | 0.8929   | 0.597     | 0.2059    | 0.5721  | 0.1964    | 0.5121   |
| 0.388          | NA      | 0.456    | 0.6101    | 0.1659    | 0.44    | 0.0394    | 0.2304   |
| 0.6355         | NA      | 0.8226   | 0.7565    | 0.357     | 0.5962  | 0.0664    | 0.4608   |
| -2.402         | NA      | -1.7956  | -1.9901   | 0.3805    | -2.2792 | 0.077     | -2.4137  |
| 0.3616         | NA      | 0.6629   | 0.6815    | 0.2424    | 0.3637  | -0.016    | 0.275    |
| -2.192         | NA      | -1.9995  | -2.0711   | 0.3764    | -2.3251 | 0.1577    | -2.2543  |
| 0.3557         | NA      | 0.7769   | 0.6483    | 0.2145    | 0.3863  | 0.1038    | 0.1924   |
| -2.2743        | NA      | 1.3158   | -2.0313   | -2.4293   | -2.2003 | 0.1492    | -2.3056  |
| 0.3121         | 0.347   | -0.0852  | -0.3183   | 0.2563    | -0.942  | 0.0627    | -0.1182  |
| -0.1771        | 1.2781  | 0.5548   | -0.0553   | -0.0711   | -0.2329 | 0.133     | -0.2713  |
| -0.1118        | 1.009   | 0.3614   | -0.3271   | 0.0631    | -0.4797 | 0.1115    | -0.2278  |
| 0.0441         | 0.4073  | -0.3336  | -0.7693   | 0.4139    | -0.9405 | 0.0005    | 0.0023   |
| -0.0633        | 1.5417  | 0.4841   | -0.2722   | -0.0318   | -0.2604 | 0.1455    | -0.3009  |
| -0.0486        | 0.8442  | -0.0008  | -0.3595   | 0.128     | -0.5129 | 0.0858    | -0.1769  |
| -0.0202        | -0.0068 | -0.6169  | -0.932    | 0.236     | -0.0127 | 0.0302    | -0.0639  |
| 0.005          | 1.5165  | 0.8175   | 0.2283    | -0.0334   | -0.4495 | 0.1982    | -0.3167  |
| -0.0481        | 0.8878  | 0.254    | -0.4092   | 0.0873    | -0.4227 | 0.116     | -0.2353  |
| -0.0072        | 1.2228  | 0.5589   | -0.1227   | 0.0903    | -0.4979 | 0.0547    | -0.0916  |

Table S6. Fold changes with 95% confidence intervals for all chemical-population group pairs in Figure 3 that had significant differences in exposure compared to the total population.

| DTXSID        | CAS        | Chemical                       | ChemicalClass                    | Population         | log2FC | lowCI | upCI  |
|---------------|------------|--------------------------------|----------------------------------|--------------------|--------|-------|-------|
| DTXSID1049801 | 7440-31-5  | Tin                            | Metals and Metalloids            | 3 - 5 years        | 2.775  | 2.774 | 2.777 |
| DTXSID1021956 | 117-84-0   | Di-n-octyl phthalate           | Phthalates                       | 3 - 5 years        | 2.439  | 2.437 | 2.441 |
| DTXSID5020607 | 117-81-7   | Di-2-ethylhexyl phthalate      | Phthalates                       | 3 - 5 years        | 2.385  | 2.385 | 2.386 |
| DTXSID8052481 | 7440-33-7  | Tungsten                       | Metals and Metalloids            | 3 - 5 years        | 2.316  | 2.314 | 2.318 |
| DTXSID3020205 | 85-68-7    | Benzylbutyl phthalate          | Phthalates                       | 3 - 5 years        | 2.241  | 2.230 | 2.253 |
| DTXSID6024252 | 14797-73-0 | Perchlorate                    | Perchlorate and Other Anions     | 3 - 5 years        | 2.075  | 2.073 | 2.077 |
| DTXSID1024207 | 7439-98-7  | Molybdenum                     | Metals and Metalloids            | 3 - 5 years        | 1.959  | 1.958 | 1.961 |
| DTXSID4025082 | 26761-40-0 | Di-isodecyl phthalate          | Phthalates                       | 3 - 5 years        | 1.954  | 1.952 | 1.955 |
| DTXSID2024169 | 7439-96-5  | Manganese                      | Metals and Metalloids            | 3 - 5 years        | 1.898  | 1.894 | 1.901 |
| DTXSID7020182 | 80-05-7    | Bisphenol A                    | Personal Care/Consumer Product   | 3 - 5 years        | 1.891  | 1.888 | 1.895 |
| DTXSID9022522 | 84-69-5    | Di-isobutyl phthalate          | Phthalates                       | 3 - 5 years        | 1.859  | 1.857 | 1.861 |
| DTXSID4022521 | 28553-12-0 | Di-isononyl phthalate          | Phthalates                       | 3 - 5 years        | 1.825  | 1.822 | 1.828 |
| DTXSID3022455 | 131-11-3   | Dimethyl phthalate             | Phthalates                       | 6 - 11 years       | 1.786  | 1.781 | 1.792 |
| DTXSID5023879 | 7440-36-0  | Antimony                       | Metals and Metalloids            | 3 - 5 years        | 1.665  | 1.663 | 1.667 |
| DTXSID5024217 | 14797-55-8 | Nitrate                        | Perchlorate and Other Anions     | 3 - 5 years        | 1.658  | 1.657 | 1.659 |
| DTXSID1040320 | 42576-02-3 | Bifenox                        | Personal Care/Consumer Product   | 3 - 5 years        | 1.631  | 1.549 | 1.708 |
| DTXSID8042349 | 34643-46-4 | Prothiofos                     | Personal Care/Consumer Product   | 3 - 5 years        | 1.623  | 1.542 | 1.699 |
| DTXSID3024289 | 129-00-0   | Pyrene                         | Polycyclic Aromatic Hydrocarbons | 3 - 5 years        | 1.601  | 1.599 | 1.603 |
| DTXSID2021781 | 84-74-2    | Dibutyl phthalate              | Phthalates                       | 3 - 5 years        | 1.576  | 1.503 | 1.645 |
| DTXSID3022405 | 131-57-7   | Benzophenone-3                 | Personal Care/Consumer Product   | 3 - 5 years        | 1.562  | 1.549 | 1.574 |
| DTXSID8052481 | 7440-33-7  | Tungsten                       | Metals and Metalloids            | 6 - 11 years       | 1.562  | 1.559 | 1.564 |
| DTXSID7021360 | 108-88-3   | Toulene                        | Volatile Organic Compounds       | 3 - 5 years        | 1.541  | 1.540 | 1.543 |
| DTXSID3022409 | 80-09-1    | Bisphenol S                    | Personal Care/Consumer Product   | 3 - 5 years        | 1.537  | 1.533 | 1.542 |
| DTXSID8040274 | 97-17-6    | Dichlofenthion                 | Personal Care/Consumer Product   | 3 - 5 years        | 1.534  | 1.449 | 1.614 |
| DTXSID7020970 | 1836-75-5  | Nitrofen                       | Organophosphorus Insecticides    | 3 - 5 years        | 1.528  | 1.443 | 1.608 |
| DTXSID3039242 | 71-43-2    | Benzene                        | Volatile Organic Compounds       | 3 - 5 years        | 1.519  | 1.516 | 1.522 |
| DTXSID0020442 | 94-75-7    | 2,4-Dichlorophenoxyacetic acid | Personal Care/Consumer Product   | 3 - 5 years        | 1.515  | 1.427 | 1.598 |
| DTXSID2036035 | 7440-28-0  | Thallium                       | Metals and Metalloids            | 3 - 5 years        | 1.514  | 1.513 | 1.515 |
| DTXSID1020431 | 106-46-7   | para-Dichlorobenzene           | Personal Care/Consumer Product   | 3 - 5 years        | 1.513  | 1.502 | 1.524 |
| DTXSID6022056 | 541-73-1   | 1,3-dichlorobenzene            | Personal Care/Consumer Product   | 3 - 5 years        | 1.513  | 1.428 | 1.594 |
| DTXSID6058055 | 32861-85-1 | Chlomethoxyfen                 | Personal Care/Consumer Product   | 3 - 5 years        | 1.492  | 1.401 | 1.577 |
| DTXSID0058069 | 36519-00-3 | Phosdiphen                     | Personal Care/Consumer Product   | 3 - 5 years        | 1.490  | 1.398 | 1.576 |
| DTXSID3020205 | 85-68-7    | Benzylbutyl phthalate          | Phthalates                       | 6 - 11 years       | 1.489  | 1.470 | 1.507 |
| DTXSID1049801 | 7440-31-5  | Tin                            | Metals and Metalloids            | 6 - 11 years       | 1.435  | 1.432 | 1.438 |
| DTXSID5036767 | 7440-46-2  | Cesium                         | Metals and Metalloids            | 3 - 5 years        | 1.428  | 1.427 | 1.430 |
| DTXSID9020407 | 333-41-5   | Diazinon                       | Organophosphorus Insecticides    | 66 years and older | 1.407  | 1.391 | 1.422 |
| DTXSID2024161 | 7439-92-1  | Lead                           | Metals and Metalloids            | 3 - 5 years        | 1.400  | 1.397 | 1.402 |

|               |             |                                                     |                                  |                    |        |        |        |
|---------------|-------------|-----------------------------------------------------|----------------------------------|--------------------|--------|--------|--------|
| DTXSID7074828 | 13464-58-9  | Arsenous acid                                       | Metals and Metalloids            | 3 - 5 years        | 1.386  | 1.378  | 1.393  |
| DTXSID9022528 | 120-47-8    | Ethyl paraben                                       | Personal Care/Consumer Product   | ReproAgeFemale     | 1.374  | 1.367  | 1.381  |
| DTXSID4022527 | 94-13-3     | n-propyl paraben                                    | Personal Care/Consumer Product   | 3 - 5 years        | 1.357  | 1.350  | 1.365  |
| DTXSID7020508 | 75-60-5     | Dimethylarsinic acid                                | Metals and Metalloids            | 3 - 5 years        | 1.354  | 1.352  | 1.357  |
| DTXSID1021956 | 117-84-0    | Di-n-octyl phthalate                                | Phthalates                       | 6 - 11 years       | 1.333  | 1.330  | 1.336  |
| DTXSID9020407 | 333-41-5    | Diazinon                                            | Organophosphorus Insecticides    | 6 - 11 years       | 1.293  | 1.276  | 1.309  |
| DTXSID3020203 | 106-99-0    | 1,3-Butadiene                                       | Volatile Organic Compounds       | 3 - 5 years        | 1.278  | 1.276  | 1.280  |
| DTXSID8023894 | 7440-39-3   | Barium                                              | Metals and Metalloids            | 3 - 5 years        | 1.276  | 1.273  | 1.279  |
| DTXSID5021411 | 115-96-8    | Tris(2-chloroethyl) phosphate (TC Flame Retardant   |                                  | 6 - 11 years       | 1.265  | 1.260  | 1.269  |
| DTXSID1024207 | 7439-98-7   | Molybdenum                                          | Metals and Metalloids            | 6 - 11 years       | 1.260  | 1.258  | 1.262  |
| DTXSID9022310 | 486-66-8    | Daidzein                                            | Phytoestrogens                   | 6 - 11 years       | 1.258  | 1.254  | 1.262  |
| DTXSID5020607 | 117-81-7    | Di-2-ethylhexyl phthalate                           | Phthalates                       | 6 - 11 years       | 1.253  | 1.251  | 1.254  |
| DTXSID4022529 | 99-76-3     | Methyl paraben                                      | Personal Care/Consumer Product   | 3 - 5 years        | 1.240  | 1.233  | 1.248  |
| DTXSID5026259 | 13674-84-5  | Tris(1-chloro-2-propyl) phosphate                   | Flame Retardant                  | 6 - 11 years       | 1.235  | 1.230  | 1.239  |
| DTXSID5020027 | 79-06-1     | Acrylamide                                          | Volatile Organic Compounds       | 3 - 5 years        | 1.223  | 1.221  | 1.225  |
| DTXSID1042522 | 7440-61-1   | Uranium                                             | Metals and Metalloids            | 3 - 5 years        | 1.190  | 1.183  | 1.197  |
| DTXSID4022527 | 94-13-3     | n-propyl paraben                                    | Personal Care/Consumer Product   | ReproAgeFemale     | 1.172  | 1.166  | 1.177  |
| DTXSID2021151 | 90-43-7     | ortho-Phenylphenol                                  | Fungicides                       | 6 - 11 years       | 1.150  | 1.135  | 1.165  |
| DTXSID4022527 | 94-13-3     | n-propyl paraben                                    | Personal Care/Consumer Product   | Female             | 1.102  | 1.093  | 1.110  |
| DTXSID5022308 | 446-72-0    | Genistein                                           | Phytoestrogens                   | 6 - 11 years       | 1.088  | 1.082  | 1.093  |
| DTXSID9022528 | 120-47-8    | Ethyl paraben                                       | Personal Care/Consumer Product   | Female             | 1.080  | 1.067  | 1.092  |
| DTXSID3021986 | 126-73-8    | Tri-n-butyl phosphate (TbUP)                        | Flame Retardant                  | 6 - 11 years       | 1.061  | 1.053  | 1.069  |
| DTXSID5023879 | 7440-36-0   | Antimony                                            | Metals and Metalloids            | 6 - 11 years       | 1.054  | 1.050  | 1.057  |
| DTXSID6024252 | 14797-73-0  | Perchlorate                                         | Perchlorate and Other Anions     | 6 - 11 years       | 1.043  | 1.039  | 1.047  |
| DTXSID8058118 | 52570-16-8  | Naproanilide                                        | Polycyclic Aromatic Hydrocarbons | 3 - 5 years        | 1.042  | 1.036  | 1.049  |
| DTXSID2024169 | 7439-96-5   | Manganese                                           | Metals and Metalloids            | 6 - 11 years       | 1.021  | 1.013  | 1.028  |
| DTXSID5020023 | 107-02-8    | Acrolein                                            | Volatile Organic Compounds       | 3 - 5 years        | 1.010  | 1.007  | 1.012  |
| DTXSID4022527 | 94-13-3     | n-propyl paraben                                    | Personal Care/Consumer Product   | Male               | -1.121 | -1.142 | -1.099 |
| DTXSID3024289 | 129-00-0    | Pyrene                                              | Polycyclic Aromatic Hydrocarbons | 66 years and older | -1.184 | -1.212 | -1.156 |
| DTXSID8020381 | 52918-63-5  | Deltamethrin                                        | Pyrethroids                      | BMI > 30           | -1.335 | -1.483 | -1.201 |
| DTXSID1024172 | 7439-97-6   | Mercury                                             | Metals and Metalloids            | 12 - 19 years      | -1.364 | -1.400 | -1.329 |
| DTXSID7074828 | 13464-58-9  | Arsenous acid                                       | Metals and Metalloids            | 66 years and older | -1.398 | -1.571 | -1.244 |
| DTXSID7020001 | 26148-68-5  | 2-Amino-9H-pyrido[2,3-b]indole (Heterocyclic Amines |                                  | 66 years and older | -1.404 | -1.525 | -1.292 |
| DTXSID1023940 | 7440-43-9   | Cadmium                                             | Metals and Metalloids            | 12 - 19 years      | -1.405 | -1.433 | -1.378 |
| DTXSID1023940 | 7440-43-9   | Cadmium                                             | Metals and Metalloids            | 6 - 11 years       | -1.434 | -1.465 | -1.403 |
| DTXSID1023940 | 7440-43-9   | Cadmium                                             | Metals and Metalloids            | 3 - 5 years        | -1.488 | -1.505 | -1.471 |
| DTXSID6034764 | 111991-09-4 | Nicosulfuron                                        | Sulfonyl Urea Herbicides         | 66 years and older | -1.691 | -3.037 | -1.008 |
| DTXSID1052741 | 12071-83-9  | Propineb                                            | Fungicides                       | 12 - 19 years      | -1.978 | -4.469 | -1.112 |

Table S7. Bioactivity:exposure ratios (BER) for parent chemicals of NHANES metabolites with 95% confidence intervals.

| DTXSID        | CAS       | Chemical                   | ChemicalClass                    | Population | BER      | lowCI    | upCI     |
|---------------|-----------|----------------------------|----------------------------------|------------|----------|----------|----------|
| DTXSID2021284 | 100-42-5  | Styrene                    | Volatile Organic Compounds       | Total      | 1.65E+02 | 1.56E+02 | 2.11E+06 |
| DTXSID1020431 | 106-46-7  | para-Dichlorobenzene       | Personal Care/Consumer Product   | Total      | 1.27E+04 | 1.17E+04 | 1.37E+04 |
| DTXSID3020203 | 106-99-0  | 1,3-Butadiene              | Volatile Organic Compounds       | Total      | 7.07E+02 | 6.95E+02 | 7.18E+02 |
| DTXSID5020029 | 107-13-1  | Acrylonitrile              | Volatile Organic Compounds       | Total      | 7.32E+04 | 6.72E+04 | 7.96E+04 |
| DTXSID7021360 | 108-88-3  | Toulene                    | Volatile Organic Compounds       | Total      | 1.49E+04 | 1.45E+04 | 1.54E+04 |
| DTXSID9022528 | 120-47-8  | Ethyl paraben              | Personal Care/Consumer Product   | Total      | 6.76E+04 | 5.87E+04 | 7.74E+04 |
| DTXSID2021319 | 127-18-4  | Tetrachloroethene          | Volatile Organic Compounds       | Total      | 1.33E+05 | 1.04E+04 | 2.27E+07 |
| DTXSID3024289 | 129-00-0  | Pyrene                     | Polycyclic Aromatic Hydrocarbons | Total      | 1.38E+04 | 1.32E+04 | 1.43E+04 |
| DTXSID3022405 | 131-57-7  | Benzophenone-3             | Personal Care/Consumer Product   | Total      | 3.11E+03 | 2.87E+03 | 3.39E+03 |
| DTXSID5032498 | 3380-34-5 | Triclosan                  | Personal Care/Consumer Product   | Total      | 7.81E+03 | 7.08E+03 | 8.61E+03 |
| DTXSID9020247 | 63-25-2   | Carbaryl                   | Polycyclic Aromatic Hydrocarbons | Total      | 2.21E+04 | 1.44E+04 | 2.30E+07 |
| DTXSID3039242 | 71-43-2   | Benzene                    | Volatile Organic Compounds       | Total      | 2.23E+05 | 2.14E+05 | 2.34E+05 |
| DTXSID0021383 | 79-01-6   | Trichloroethene            | Volatile Organic Compounds       | Total      | 1.16E+06 | 6.61E+04 | 4.23E+08 |
| DTXSID7020182 | 80-05-7   | Bisphenol A                | Personal Care/Consumer Product   | Total      | 2.32E+04 | 2.25E+04 | 2.41E+04 |
| DTXSID3022409 | 80-09-1   | Bisphenol S                | Personal Care/Consumer Product   | Total      | 1.13E+05 | 1.07E+05 | 1.18E+05 |
| DTXSID7021780 | 84-66-2   | Diethyl phthalate          | Phthalates                       | Total      | 1.70E+03 | 1.63E+03 | 1.79E+03 |
| DTXSID9022522 | 84-69-5   | Di-isobutyl phthalate      | Phthalates                       | Total      | 8.66E+03 | 8.40E+03 | 8.92E+03 |
| DTXSID2021781 | 84-74-2   | Dibutyl phthalate          | Phthalates                       | Total      | 1.23E+04 | 1.76E+03 | 1.30E+07 |
| DTXSID8024105 | 86-73-7   | Fluorene                   | Polycyclic Aromatic Hydrocarbons | Total      | 4.48E+04 | 4.36E+04 | 4.60E+04 |
| DTXSID8020913 | 91-20-3   | Naphthalene                | Polycyclic Aromatic Hydrocarbons | Total      | 2.95E+04 | 2.45E+03 | 6.53E+07 |
| DTXSID4022527 | 94-13-3   | n-propyl paraben           | Personal Care/Consumer Product   | Total      | 1.18E+04 | 1.09E+04 | 1.27E+04 |
| DTXSID3020209 | 94-26-8   | Butyl paraben              | Personal Care/Consumer Product   | Total      | 6.32E+05 | 4.42E+05 | 1.70E+06 |
| DTXSID0020442 | 94-75-7   | 2,4-Dichlorophenoxyacetin  | Personal Care/Consumer Product   | Total      | 3.40E+04 | 3.30E+03 | 8.93E+06 |
| DTXSID4022529 | 99-76-3   | Methyl paraben             | Personal Care/Consumer Product   | Total      | 2.45E+03 | 2.28E+03 | 2.63E+03 |
| DTXSID5021411 | 115-96-8  | Tris(2-chloroethyl) phosph | Flame Retardant                  | Total      | 3.07E+05 | 2.92E+05 | 3.21E+05 |
| DTXSID3021986 | 126-73-8  | Tri-n-butyl phosphate (TB  | Flame Retardant                  | Total      | 1.96E+03 | 1.89E+03 | 2.04E+03 |
| DTXSID2021995 | 134-62-3  | N,N-Diethyl-3-methylbenz   | Insect Repellent                 | Total      | 1.73E+06 | 9.34E+05 | 8.33E+06 |
| DTXSID7022174 | 2104-64-5 | EPN                        | Organophosphorus Insecticides    | Total      | 8.72E+04 | 2.92E+03 | 2.25E+08 |
| DTXSID4020458 | 2921-88-2 | Chlorpyrifos               | Organophosphorus Insecticides    | Total      | 4.76E+03 | 5.77E+02 | 2.36E+07 |
| DTXSID1020855 | 298-00-0  | Methyl parathion           | Organophosphorus Insecticides    | Total      | 1.25E+06 | 4.13E+04 | 2.84E+09 |

| DTXSID        | CAS         | Chemical                 | ChemicalClass                                         | Population | BER      | lowCI    | upCI     |
|---------------|-------------|--------------------------|-------------------------------------------------------|------------|----------|----------|----------|
| DTXSID9020407 | 333-41-5    | Diazinon                 | Organophosphorus<br>Insecticides                      | Total      | 1.21E+06 | 1.03E+06 | 1.42E+06 |
| DTXSID8022292 | 52645-53-1  | Permethrin               | Pyrethroids                                           | Total      | 3.82E+05 | 1.61E+05 | 8.59E+08 |
| DTXSID5035957 | 68359-37-5  | Cyfluthrin               | Pyrethroids                                           | Total      | 2.63E+05 | 1.45E+05 | 1.49E+06 |
| DTXSID3020964 | 98-95-3     | Nitrobenzene             | Organophosphorus<br>Insecticides                      | Total      | 2.86E+06 | 9.94E+04 | 6.01E+09 |
| DTXSID4020791 | 121-75-5    | Malathion                | Organophosphorus<br>Insecticides                      | Total      | 7.52E+05 | 2.80E+04 | 3.34E+08 |
| DTXSID2022254 | 13071-79-9  | Terbufos                 | Organophosphorus<br>Insecticides                      | Total      | 2.15E+06 | 6.19E+04 | 5.57E+08 |
| DTXSID3022455 | 131-11-3    | Dimethyl phthalate       | Phthalates                                            | Total      | 3.75E+04 | 3.48E+04 | 4.04E+04 |
| DTXSID9023914 | 141-66-2    | Dicrotophos              | Organophosphorus<br>Insecticides                      | Total      | 3.99E+05 | 1.79E+04 | 2.40E+08 |
| DTXSID0024266 | 29232-93-7  | Pirimiphos-methyl        | Organophosphorus<br>Insecticides                      | Total      | 2.35E+05 | 1.17E+04 | 1.75E+08 |
| DTXSID4032459 | 298-02-2    | Phorate                  | Organophosphorus<br>Insecticides                      | Total      | 6.42E+04 | 1.90E+03 | 1.65E+07 |
| DTXSID7024328 | 3689-24-5   | Sulfotepp                | Organophosphorus<br>Insecticides                      | Total      | 2.20E+05 | 1.51E+04 | 2.13E+08 |
| DTXSID0021389 | 52-68-6     | Trichlorfon              | Organophosphorus<br>Insecticides                      | Total      | 4.48E+05 | 1.78E+04 | 3.55E+08 |
| DTXSID2032344 | 54593-83-8  | Chlorethoxyphos          | Organophosphorus<br>Insecticides                      | Total      | 2.02E+05 | 1.61E+04 | 2.05E+08 |
| DTXSID2020347 | 56-72-4     | Coumaphos                | Organophosphorus<br>Insecticides                      | Total      | 2.75E+04 | 2.09E+03 | 2.32E+07 |
| DTXSID2024086 | 563-12-2    | Ethion                   | Organophosphorus<br>Insecticides                      | Total      | 2.44E+05 | 5.85E+03 | 5.28E+07 |
| DTXSID7020479 | 60-51-5     | Dimethoate               | Organophosphorus<br>Insecticides                      | Total      | 5.70E+05 | 2.28E+04 | 3.01E+08 |
| DTXSID5020449 | 62-73-7     | Dichlorvos               | Organophosphorus<br>Insecticides                      | Total      | 2.02E+05 | 8.51E+03 | 1.48E+08 |
| DTXSID5024261 | 732-11-6    | Phosmet                  | Organophosphorus<br>Insecticides                      | Total      | 4.81E+05 | 2.02E+04 | 2.62E+08 |
| DTXSID3020122 | 86-50-0     | Azinphos methyl          | Organophosphorus<br>Insecticides                      | Total      | 4.43E+05 | 1.94E+04 | 2.27E+08 |
| DTXSID5020819 | 950-37-8    | Methodathion             | Organophosphorus<br>Insecticides                      | Total      | 5.68E+05 | 2.16E+04 | 2.30E+08 |
| DTXSID9022360 | 140-66-9    | 4-tert-Octylphenol       | Organophosphorus<br>Personal Care/Consumer<br>Product | Total      | 4.88E+04 | 2.31E+04 | 2.87E+05 |
| DTXSID5022308 | 446-72-0    | Genistein                | Phytoestrogens                                        | Total      | 1.42E+03 | 1.33E+03 | 1.52E+03 |
| DTXSID9022310 | 486-66-8    | Daidzein                 | Phytoestrogens                                        | Total      | 8.71E+02 | 8.23E+02 | 9.20E+02 |
| DTXSID2020686 | 58-89-9     | Lindane                  | Fungicides                                            | Total      | 1.70E+05 | 6.21E+03 | 5.73E+07 |
| DTXSID7020687 | 608-73-1    | Hexachlorocyclohexane    | Fungicides                                            | Total      | 1.99E+05 | 6.48E+03 | 5.89E+07 |
| DTXSID7021106 | 87-86-5     | Pentachlorophenol        | Fungicides                                            | Total      | 3.55E+05 | 1.22E+04 | 1.84E+08 |
| DTXSID2021151 | 90-43-7     | ortho-Phenylphenol       | Fungicides                                            | Total      | 3.06E+04 | 2.72E+04 | 3.44E+04 |
| DTXSID5021388 | 93-76-5     | 2,4,5-Trichlorophenoxyac | Herbicides                                            | Total      | 6.18E+05 | 1.63E+05 | 3.54E+07 |
| DTXSID1032642 | 122931-48-0 | Rimsulfuron              | Sulfonyl Urea Herbicides                              | Total      | 3.90E+08 | 1.83E+07 | 2.47E+11 |
| DTXSID4034364 | 144651-06-9 | Oxasulfuron              | Sulfonyl Urea Herbicides                              | Total      | 4.88E+08 | 2.43E+07 | 3.59E+11 |
| DTXSID7034753 | 173159-57-4 | Foramsulfuron            | Sulfonyl Urea Herbicides                              | Total      | 2.22E+08 | 1.13E+07 | 1.07E+11 |
| DTXSID9020112 | 1912-24-9   | Atrazine                 | Herbicides                                            | Total      | 1.89E+06 | 1.83E+05 | 6.71E+07 |
| DTXSID8023846 | 30560-19-1  | Acephate                 | Organophosphorus<br>Insecticides                      | Total      | 1.31E+06 | 3.87E+05 | 1.68E+07 |
| DTXSID6023864 | 74223-64-6  | Metsulfuron-methyl       | Sulfonyl Urea Herbicides                              | Total      | 5.87E+07 | 1.01E+07 | 4.56E+09 |
| DTXSID7024164 | 83055-99-6  | Bensulfuron-methyl       | Sulfonyl Urea Herbicides                              | Total      | 2.89E+08 | 1.44E+07 | 1.63E+11 |
| DTXSID9034573 | 97780-06-8  | Ethametsulfuron-methyl   | Sulfonyl Urea Herbicides                              | Total      | 7.15E+07 | 3.36E+06 | 3.54E+10 |
| DTXSID7021948 | 114-26-1    | Propoxur                 | Carbamate Pesticides                                  | Total      | 1.54E+08 | 2.53E+06 | 3.16E+11 |
| DTXSID9020249 | 1563-66-2   | Carbofuran               | Carbamate Pesticides                                  | Total      | 1.09E+07 | 3.36E+05 | 3.56E+10 |
| DTXSID8023848 | 34256-82-1  | Acetochlor               | Unknown                                               | Total      | 7.41E+06 | 2.07E+06 | 1.41E+08 |

| DTXSID        | CAS        | Chemical                        | ChemicalClass                    | Population | BER      | lowCI    | upCI     |
|---------------|------------|---------------------------------|----------------------------------|------------|----------|----------|----------|
| DTXSID4022448 | 51218-45-2 | Metolachlor                     | Herbicides                       | Total      | 3.33E+06 | 9.40E+05 | 4.94E+07 |
| DTXSID1022265 | 15972-60-8 | Alachlor                        | Herbicides                       | Total      | 2.20E+06 | 1.43E+06 | 3.80E+06 |
| DTXSID2021284 | 100-42-5   | Styrene                         | Volatile Organic Compounds       | Male       | 6.80E+02 | 1.56E+02 | 2.11E+06 |
| DTXSID1020431 | 106-46-7   | para-Dichlorobenzene            | Personal Care/Consumer Product   | Male       | 1.15E+04 | 1.17E+04 | 1.37E+04 |
| DTXSID3020203 | 106-99-0   | 1,3-Butadiene                   | Volatile Organic Compounds       | Male       | 6.39E+02 | 6.95E+02 | 7.18E+02 |
| DTXSID5020029 | 107-13-1   | Acrylonitrile                   | Volatile Organic Compounds       | Male       | 5.28E+04 | 6.72E+04 | 7.96E+04 |
| DTXSID7021360 | 108-88-3   | Toulene                         | Volatile Organic Compounds       | Male       | 1.40E+04 | 1.45E+04 | 1.54E+04 |
| DTXSID9022528 | 120-47-8   | Ethyl paraben                   | Personal Care/Consumer Product   | Male       | 1.25E+05 | 5.87E+04 | 7.74E+04 |
| DTXSID2021319 | 127-18-4   | Tetrachloroethene               | Volatile Organic Compounds       | Male       | 1.10E+05 | 1.04E+04 | 2.27E+07 |
| DTXSID3024289 | 129-00-0   | Pyrene                          | Polycyclic Aromatic Hydrocarbons | Male       | 1.23E+04 | 1.32E+04 | 1.43E+04 |
| DTXSID3022405 | 131-57-7   | Benzophenone-3                  | Personal Care/Consumer Product   | Male       | 4.43E+03 | 2.87E+03 | 3.39E+03 |
| DTXSID5032498 | 3380-34-5  | Triclosan                       | Personal Care/Consumer Product   | Male       | 7.86E+03 | 7.08E+03 | 8.61E+03 |
| DTXSID9020247 | 63-25-2    | Carbaryl                        | Polycyclic Aromatic Hydrocarbons | Male       | 2.00E+04 | 1.44E+04 | 2.30E+07 |
| DTXSID3039242 | 71-43-2    | Benzene                         | Volatile Organic Compounds       | Male       | 1.97E+05 | 2.14E+05 | 2.34E+05 |
| DTXSID0021383 | 79-01-6    | Trichloroethene                 | Volatile Organic Compounds       | Male       | 1.09E+06 | 6.61E+04 | 4.23E+08 |
| DTXSID7020182 | 80-05-7    | Bisphenol A                     | Personal Care/Consumer Product   | Male       | 2.14E+04 | 2.25E+04 | 2.41E+04 |
| DTXSID3022409 | 80-09-1    | Bisphenol S                     | Personal Care/Consumer Product   | Male       | 1.04E+05 | 1.07E+05 | 1.18E+05 |
| DTXSID7021780 | 84-66-2    | Diethyl phthalate               | Phthalates                       | Male       | 1.86E+03 | 1.63E+03 | 1.79E+03 |
| DTXSID9022522 | 84-69-5    | Di-isobutyl phthalate           | Phthalates                       | Male       | 8.38E+03 | 8.40E+03 | 8.92E+03 |
| DTXSID2021781 | 84-74-2    | Dibutyl phthalate               | Phthalates                       | Male       | 9.58E+03 | 1.76E+03 | 1.30E+07 |
| DTXSID8024105 | 86-73-7    | Fluorene                        | Polycyclic Aromatic Hydrocarbons | Male       | 3.82E+04 | 4.36E+04 | 4.60E+04 |
| DTXSID8020913 | 91-20-3    | Naphthalene                     | Polycyclic Aromatic Hydrocarbons | Male       | 2.83E+04 | 2.45E+03 | 6.53E+07 |
| DTXSID4022527 | 94-13-3    | n-propyl paraben                | Personal Care/Consumer Product   | Male       | 2.56E+04 | 1.09E+04 | 1.27E+04 |
| DTXSID3020209 | 94-26-8    | Butyl paraben                   | Personal Care/Consumer Product   | Male       | 9.31E+05 | 4.42E+05 | 1.70E+06 |
| DTXSID0020442 | 94-75-7    | 2,4-Dichlorophenoxyacetic acid  | Personal Care/Consumer Product   | Male       | 3.38E+04 | 3.30E+03 | 8.93E+06 |
| DTXSID4022529 | 99-76-3    | Methyl paraben                  | Personal Care/Consumer Product   | Male       | 4.34E+03 | 2.28E+03 | 2.63E+03 |
| DTXSID5021411 | 115-96-8   | Tris(2-chloroethyl) phosphate   | Flame Retardant                  | Male       | 2.80E+05 | 2.92E+05 | 3.21E+05 |
| DTXSID3021986 | 126-73-8   | Tri-n-butyl phosphate (TBP)     | Flame Retardant                  | Male       | 1.93E+03 | 1.89E+03 | 2.04E+03 |
| DTXSID2021995 | 134-62-3   | N,N-Diethyl-3-methylbenzylamine | Insect Repellent                 | Male       | 1.51E+06 | 9.34E+05 | 8.33E+06 |
| DTXSID7022174 | 2104-64-5  | EPN                             | Organophosphorus Insecticides    | Male       | 7.70E+04 | 2.92E+03 | 2.25E+08 |
| DTXSID4020458 | 2921-88-2  | Chlorpyrifos                    | Organophosphorus Insecticides    | Male       | 4.94E+03 | 5.77E+02 | 2.36E+07 |
| DTXSID1020855 | 298-00-0   | Methyl parathion                | Organophosphorus Insecticides    | Male       | 1.08E+06 | 4.13E+04 | 2.84E+09 |
| DTXSID9020407 | 333-41-5   | Diazinon                        | Organophosphorus Insecticides    | Male       | 1.21E+06 | 1.03E+06 | 1.42E+06 |



| DTXSID        | CAS         | Chemical                 | ChemicalClass                     | Population | BER      | lowCI    | upCI     |
|---------------|-------------|--------------------------|-----------------------------------|------------|----------|----------|----------|
| DTXSID8022292 | 52645-53-1  | Permethrin               | Pyrethroids                       | Male       | 1.79E+05 | 1.61E+05 | 8.59E+08 |
| DTXSID5035957 | 68359-37-5  | Cyfluthrin               | Pyrethroids                       | Male       | 2.60E+05 | 1.45E+05 | 1.49E+06 |
| DTXSID3020964 | 98-95-3     | Nitrobenzene             | Organophosphorus<br>Insecticides  | Male       | 2.38E+06 | 9.94E+04 | 6.01E+09 |
| DTXSID4020791 | 121-75-5    | Malathion                | Organophosphorus<br>Insecticides  | Male       | 6.99E+05 | 2.80E+04 | 3.34E+08 |
| DTXSID2022254 | 13071-79-9  | Terbufos                 | Organophosphorus<br>Insecticides  | Male       | 2.11E+06 | 6.19E+04 | 5.57E+08 |
| DTXSID3022455 | 131-11-3    | Dimethyl phthalate       | Phthalates                        | Male       | 3.28E+04 | 3.48E+04 | 4.04E+04 |
| DTXSID9023914 | 141-66-2    | Dicrotophos              | Organophosphorus<br>Insecticides  | Male       | 3.76E+05 | 1.79E+04 | 2.40E+08 |
| DTXSID0024266 | 29232-93-7  | Pirimiphos-methyl        | Organophosphorus<br>Insecticides  | Male       | 2.50E+05 | 1.17E+04 | 1.75E+08 |
| DTXSID4032459 | 298-02-2    | Phorate                  | Organophosphorus<br>Insecticides  | Male       | 5.63E+04 | 1.90E+03 | 1.65E+07 |
| DTXSID7024328 | 3689-24-5   | Sulfotepp                | Organophosphorus<br>Insecticides  | Male       | 1.96E+05 | 1.51E+04 | 2.13E+08 |
| DTXSID0021389 | 52-68-6     | Trichlorfon              | Organophosphorus<br>Insecticides  | Male       | 4.12E+05 | 1.78E+04 | 3.55E+08 |
| DTXSID2032344 | 54593-83-8  | Chlorethoxyphos          | Organophosphorus<br>Insecticides  | Male       | 2.37E+05 | 1.61E+04 | 2.05E+08 |
| DTXSID2020347 | 56-72-4     | Coumaphos                | Organophosphorus<br>Insecticides  | Male       | 3.03E+04 | 2.09E+03 | 2.32E+07 |
| DTXSID2024086 | 563-12-2    | Ethion                   | Organophosphorus<br>Insecticides  | Male       | 2.37E+05 | 5.85E+03 | 5.28E+07 |
| DTXSID7020479 | 60-51-5     | Dimethoate               | Organophosphorus<br>Insecticides  | Male       | 6.50E+05 | 2.28E+04 | 3.01E+08 |
| DTXSID5020449 | 62-73-7     | Dichlorvos               | Organophosphorus<br>Insecticides  | Male       | 1.85E+05 | 8.51E+03 | 1.48E+08 |
| DTXSID5024261 | 732-11-6    | Phosmet                  | Organophosphorus<br>Insecticides  | Male       | 5.19E+05 | 2.02E+04 | 2.62E+08 |
| DTXSID3020122 | 86-50-0     | Azinphos methyl          | Organophosphorus<br>Insecticides  | Male       | 4.86E+05 | 1.94E+04 | 2.27E+08 |
| DTXSID5020819 | 950-37-8    | Methidathion             | Organophosphorus<br>Insecticides  | Male       | 5.88E+05 | 2.16E+04 | 2.30E+08 |
| DTXSID9022360 | 140-66-9    | 4-tert-Octylphenol       | Personal Care/Consumer<br>Product | Male       | 4.40E+04 | 2.31E+04 | 2.87E+05 |
| DTXSID5022308 | 446-72-0    | Genistein                | Phytoestrogens                    | Male       | 1.39E+03 | 1.33E+03 | 1.52E+03 |
| DTXSID9022310 | 486-66-8    | Daidzein                 | Phytoestrogens                    | Male       | 8.86E+02 | 8.23E+02 | 9.20E+02 |
| DTXSID2020686 | 58-89-9     | Lindane                  | Fungicides                        | Male       | 1.82E+05 | 6.21E+03 | 5.73E+07 |
| DTXSID7020687 | 608-73-1    | Hexachlorocyclohexane    | Fungicides                        | Male       | 2.06E+05 | 6.48E+03 | 5.89E+07 |
| DTXSID7021106 | 87-86-5     | Pentachlorophenol        | Fungicides                        | Male       | 3.94E+05 | 1.22E+04 | 1.84E+08 |
| DTXSID2021151 | 90-43-7     | ortho-Phenylphenol       | Fungicides                        | Male       | 2.75E+04 | 2.72E+04 | 3.44E+04 |
| DTXSID5021388 | 93-76-5     | 2,4,5-Trichlorophenoxyac | Herbicides                        | Male       | 8.01E+05 | 1.63E+05 | 3.54E+07 |
| DTXSID1032642 | 122931-48-0 | Rimsulfuron              | Sulfonyl Urea Herbicides          | Male       | 4.07E+08 | 1.83E+07 | 2.47E+11 |
| DTXSID4034364 | 144651-06-9 | Oxasulfuron              | Sulfonyl Urea Herbicides          | Male       | 5.46E+08 | 2.43E+07 | 3.59E+11 |
| DTXSID7034753 | 173159-57-4 | Foramsulfuron            | Sulfonyl Urea Herbicides          | Male       | 2.27E+08 | 1.13E+07 | 1.07E+11 |
| DTXSID9020112 | 1912-24-9   | Atrazine                 | Herbicides                        | Male       | 1.92E+06 | 1.83E+05 | 6.71E+07 |
| DTXSID8023846 | 30560-19-1  | Acephate                 | Organophosphorus<br>Insecticides  | Male       | 1.18E+06 | 3.87E+05 | 1.68E+07 |
| DTXSID6023864 | 74223-64-6  | Metsulfuron-methyl       | Sulfonyl Urea Herbicides          | Male       | 4.31E+08 | 1.01E+07 | 4.56E+09 |
| DTXSID7024164 | 83055-99-6  | Bensulfuron-methyl       | Sulfonyl Urea Herbicides          | Male       | 2.98E+08 | 1.44E+07 | 1.63E+11 |
| DTXSID9034573 | 97780-06-8  | Ethametsulfuron-methyl   | Sulfonyl Urea Herbicides          | Male       | 7.66E+07 | 3.36E+06 | 3.54E+10 |
| DTXSID7021948 | 114-26-1    | Proxoxur                 | Carbamate Pesticides              | Male       | 1.33E+08 | 2.53E+06 | 3.16E+11 |
| DTXSID9020249 | 1563-66-2   | Carbofuran               | Carbamate Pesticides              | Male       | 1.11E+07 | 3.36E+05 | 3.56E+10 |
| DTXSID8023848 | 34256-82-1  | Acetochlor               | Unknown                           | Male       | 7.66E+06 | 2.07E+06 | 1.41E+08 |
| DTXSID4022448 | 51218-45-2  | Metolachlor              | Herbicides                        | Male       | 2.86E+06 | 9.40E+05 | 4.94E+07 |
| DTXSID1022265 | 15972-60-8  | Alachlor                 | Herbicides                        | Male       | 2.08E+06 | 1.43E+06 | 3.80E+06 |

| DTXSID        | CAS        | Chemical                   | ChemicalClass                    | Population | BER      | lowCI    | upCI     |
|---------------|------------|----------------------------|----------------------------------|------------|----------|----------|----------|
| DTXSID2021284 | 100-42-5   | Styrene                    | Volatile Organic Compounds       | Female     | 4.48E+02 | 1.56E+02 | 2.11E+06 |
| DTXSID1020431 | 106-46-7   | para-Dichlorobenzene       | Personal Care/Consumer Product   | Female     | 1.41E+04 | 1.17E+04 | 1.37E+04 |
| DTXSID3020203 | 106-99-0   | 1,3-Butadiene              | Volatile Organic Compounds       | Female     | 7.78E+02 | 6.95E+02 | 7.18E+02 |
| DTXSID5020029 | 107-13-1   | Acrylonitrile              | Volatile Organic Compounds       | Female     | 1.01E+05 | 6.72E+04 | 7.96E+04 |
| DTXSID7021360 | 108-88-3   | Toulene                    | Volatile Organic Compounds       | Female     | 1.59E+04 | 1.45E+04 | 1.54E+04 |
| DTXSID9022528 | 120-47-8   | Ethyl paraben              | Personal Care/Consumer Product   | Female     | 3.25E+04 | 5.87E+04 | 7.74E+04 |
| DTXSID2021319 | 127-18-4   | Tetrachloroethene          | Volatile Organic Compounds       | Female     | 1.20E+05 | 1.04E+04 | 2.27E+07 |
| DTXSID3024289 | 129-00-0   | Pyrene                     | Polycyclic Aromatic Hydrocarbons | Female     | 1.53E+04 | 1.32E+04 | 1.43E+04 |
| DTXSID3022405 | 131-57-7   | Benzophenone-3             | Personal Care/Consumer Product   | Female     | 2.21E+03 | 2.87E+03 | 3.39E+03 |
| DTXSID5032498 | 3380-34-5  | Triclosan                  | Personal Care/Consumer Product   | Female     | 7.74E+03 | 7.08E+03 | 8.61E+03 |
| DTXSID9020247 | 63-25-2    | Carbaryl                   | Polycyclic Aromatic Hydrocarbons | Female     | 2.48E+04 | 1.44E+04 | 2.30E+07 |
| DTXSID3039242 | 71-43-2    | Benzene                    | Volatile Organic Compounds       | Female     | 2.55E+05 | 2.14E+05 | 2.34E+05 |
| DTXSID0021383 | 79-01-6    | Trichloroethene            | Volatile Organic Compounds       | Female     | 1.08E+06 | 6.61E+04 | 4.23E+08 |
| DTXSID7020182 | 80-05-7    | Bisphenol A                | Personal Care/Consumer Product   | Female     | 2.51E+04 | 2.25E+04 | 2.41E+04 |
| DTXSID3022409 | 80-09-1    | Bisphenol S                | Personal Care/Consumer Product   | Female     | 1.20E+05 | 1.07E+05 | 1.18E+05 |
| DTXSID7021780 | 84-66-2    | Diethyl phthalate          | Phthalates                       | Female     | 1.57E+03 | 1.63E+03 | 1.79E+03 |
| DTXSID9022522 | 84-69-5    | Di-isobutyl phthalate      | Phthalates                       | Female     | 8.93E+03 | 8.40E+03 | 8.92E+03 |
| DTXSID2021781 | 84-74-2    | Dibutyl phthalate          | Phthalates                       | Female     | 9.03E+03 | 1.76E+03 | 1.30E+07 |
| DTXSID8024105 | 86-73-7    | Fluorene                   | Polycyclic Aromatic Hydrocarbons | Female     | 5.21E+04 | 4.36E+04 | 4.60E+04 |
| DTXSID8020913 | 91-20-3    | Naphthalene                | Polycyclic Aromatic Hydrocarbons | Female     | 3.00E+04 | 2.45E+03 | 6.53E+07 |
| DTXSID4022527 | 94-13-3    | n-propyl paraben           | Personal Care/Consumer Product   | Female     | 5.55E+03 | 1.09E+04 | 1.27E+04 |
| DTXSID3020209 | 94-26-8    | Butyl paraben              | Personal Care/Consumer Product   | Female     | 4.49E+05 | 4.42E+05 | 1.70E+06 |
| DTXSID0020442 | 94-75-7    | 2,4-Dichlorophenoxyacetit  | Personal Care/Consumer Product   | Female     | 4.02E+04 | 3.30E+03 | 8.93E+06 |
| DTXSID4022529 | 99-76-3    | Methyl paraben             | Personal Care/Consumer Product   | Female     | 1.41E+03 | 2.28E+03 | 2.63E+03 |
| DTXSID5021411 | 115-96-8   | Tris(2-chloroethyl) phosph | Flame Retardant                  | Female     | 3.32E+05 | 2.92E+05 | 3.21E+05 |
| DTXSID3021986 | 126-73-8   | Tri-n-butyl phosphate (TB  | Flame Retardant                  | Female     | 1.99E+03 | 1.89E+03 | 2.04E+03 |
| DTXSID2021995 | 134-62-3   | N,N-Diethyl-3-methylbenz   | Insect Repellent                 | Female     | 1.81E+06 | 9.34E+05 | 8.33E+06 |
| DTXSID7022174 | 2104-64-5  | EPN                        | Organophosphorus Insecticides    | Female     | 8.08E+04 | 2.92E+03 | 2.25E+08 |
| DTXSID4020458 | 2921-88-2  | Chlorpyrifos               | Organophosphorus Insecticides    | Female     | 4.03E+03 | 5.77E+02 | 2.36E+07 |
| DTXSID1020855 | 298-00-0   | Methyl parathion           | Organophosphorus Insecticides    | Female     | 1.02E+06 | 4.13E+04 | 2.84E+09 |
| DTXSID9020407 | 333-41-5   | Diazinon                   | Organophosphorus Insecticides    | Female     | 1.19E+06 | 1.03E+06 | 1.42E+06 |
| DTXSID8022292 | 52645-53-1 | Permethrin                 | Pyrethroids                      | Female     | 4.22E+05 | 1.61E+05 | 8.59E+08 |
| DTXSID5035957 | 68359-37-5 | Cyfluthrin                 | Pyrethroids                      | Female     | 2.83E+05 | 1.45E+05 | 1.49E+06 |

| DTXSID        | CAS         | Chemical                 | ChemicalClass                     | Population  | BER      | lowCI    | upCI     |
|---------------|-------------|--------------------------|-----------------------------------|-------------|----------|----------|----------|
| DTXSID3020964 | 98-95-3     | Nitrobenzene             | Organophosphorus<br>Insecticides  | Female      | 3.01E+06 | 9.94E+04 | 6.01E+09 |
| DTXSID4020791 | 121-75-5    | Malathion                | Organophosphorus<br>Insecticides  | Female      | 6.86E+05 | 2.80E+04 | 3.34E+08 |
| DTXSID2022254 | 13071-79-9  | Terbufos                 | Organophosphorus<br>Insecticides  | Female      | 2.43E+06 | 6.19E+04 | 5.57E+08 |
| DTXSID3022455 | 131-11-3    | Dimethyl phthalate       | Phthalates                        | Female      | 4.29E+04 | 3.48E+04 | 4.04E+04 |
| DTXSID9023914 | 141-66-2    | Dicrotophos              | Organophosphorus<br>Insecticides  | Female      | 4.17E+05 | 1.79E+04 | 2.40E+08 |
| DTXSID0024266 | 29232-93-7  | Pirimiphos-methyl        | Organophosphorus<br>Insecticides  | Female      | 2.80E+05 | 1.17E+04 | 1.75E+08 |
| DTXSID4032459 | 298-02-2    | Phorate                  | Organophosphorus<br>Insecticides  | Female      | 6.50E+04 | 1.90E+03 | 1.65E+07 |
| DTXSID7024328 | 3689-24-5   | Sulfotepp                | Organophosphorus<br>Insecticides  | Female      | 2.49E+05 | 1.51E+04 | 2.13E+08 |
| DTXSID0021389 | 52-68-6     | Trichlorfon              | Organophosphorus<br>Insecticides  | Female      | 4.22E+05 | 1.78E+04 | 3.55E+08 |
| DTXSID2032344 | 54593-83-8  | Chlorethoxyphos          | Organophosphorus<br>Insecticides  | Female      | 2.37E+05 | 1.61E+04 | 2.05E+08 |
| DTXSID2020347 | 56-72-4     | Coumaphos                | Organophosphorus<br>Insecticides  | Female      | 3.13E+04 | 2.09E+03 | 2.32E+07 |
| DTXSID2024086 | 563-12-2    | Ethion                   | Organophosphorus<br>Insecticides  | Female      | 2.49E+05 | 5.85E+03 | 5.28E+07 |
| DTXSID7020479 | 60-51-5     | Dimethoate               | Organophosphorus<br>Insecticides  | Female      | 5.89E+05 | 2.28E+04 | 3.01E+08 |
| DTXSID5020449 | 62-73-7     | Dichlorvos               | Organophosphorus<br>Insecticides  | Female      | 2.22E+05 | 8.51E+03 | 1.48E+08 |
| DTXSID5024261 | 732-11-6    | Phosmet                  | Organophosphorus<br>Insecticides  | Female      | 4.89E+05 | 2.02E+04 | 2.62E+08 |
| DTXSID3020122 | 86-50-0     | Azinphos methyl          | Organophosphorus<br>Insecticides  | Female      | 5.01E+05 | 1.94E+04 | 2.27E+08 |
| DTXSID5020819 | 950-37-8    | Methidathion             | Organophosphorus<br>Insecticides  | Female      | 4.69E+05 | 2.16E+04 | 2.30E+08 |
| DTXSID9022360 | 140-66-9    | 4-tert-Octylphenol       | Personal Care/Consumer<br>Product | Female      | 4.69E+04 | 2.31E+04 | 2.87E+05 |
| DTXSID5022308 | 446-72-0    | Genistein                | Phytoestrogens                    | Female      | 1.45E+03 | 1.33E+03 | 1.52E+03 |
| DTXSID9022310 | 486-66-8    | Daidzein                 | Phytoestrogens                    | Female      | 8.62E+02 | 8.23E+02 | 9.20E+02 |
| DTXSID2020686 | 58-89-9     | Lindane                  | Fungicides                        | Female      | 1.67E+05 | 6.21E+03 | 5.73E+07 |
| DTXSID7020687 | 608-73-1    | Hexachlorocyclohexane    | Fungicides                        | Female      | 1.94E+05 | 6.48E+03 | 5.89E+07 |
| DTXSID7021106 | 87-86-5     | Pentachlorophenol        | Fungicides                        | Female      | 3.72E+05 | 1.22E+04 | 1.84E+08 |
| DTXSID2021151 | 90-43-7     | ortho-Phenylphenol       | Fungicides                        | Female      | 3.36E+04 | 2.72E+04 | 3.44E+04 |
| DTXSID5021388 | 93-76-5     | 2,4,5-Trichlorophenoxyac | Herbicides                        | Female      | 4.93E+05 | 1.63E+05 | 3.54E+07 |
| DTXSID1032642 | 122931-48-0 | Rimsulfuron              | Sulfonyl Urea Herbicides          | Female      | 3.29E+08 | 1.83E+07 | 2.47E+11 |
| DTXSID4034364 | 144651-06-9 | Oxasulfuron              | Sulfonyl Urea Herbicides          | Female      | 4.67E+08 | 2.43E+07 | 3.59E+11 |
| DTXSID7034753 | 173159-57-4 | Foramsulfuron            | Sulfonyl Urea Herbicides          | Female      | 2.15E+08 | 1.13E+07 | 1.07E+11 |
| DTXSID9020112 | 1912-24-9   | Atrazine                 | Herbicides                        | Female      | 1.60E+06 | 1.83E+05 | 6.71E+07 |
| DTXSID8023846 | 30560-19-1  | Acephate                 | Organophosphorus<br>Insecticides  | Female      | 1.31E+06 | 3.87E+05 | 1.68E+07 |
| DTXSID6023864 | 74223-64-6  | Metsulfuron-methyl       | Sulfonyl Urea Herbicides          | Female      | 4.74E+07 | 1.01E+07 | 4.56E+09 |
| DTXSID7024164 | 83055-99-6  | Bensulfuron-methyl       | Sulfonyl Urea Herbicides          | Female      | 2.55E+08 | 1.44E+07 | 1.63E+11 |
| DTXSID9034573 | 97780-06-8  | Ethametsulfuron-methyl   | Sulfonyl Urea Herbicides          | Female      | 5.91E+07 | 3.36E+06 | 3.54E+10 |
| DTXSID7021948 | 114-26-1    | Propoxur                 | Carbamate Pesticides              | Female      | 1.71E+08 | 2.53E+06 | 3.16E+11 |
| DTXSID9020249 | 1563-66-2   | Carbofuran               | Carbamate Pesticides              | Female      | 1.68E+07 | 3.36E+05 | 3.56E+10 |
| DTXSID8023848 | 34256-82-1  | Acetochlor               | Unknown                           | Female      | 7.14E+06 | 2.07E+06 | 1.41E+08 |
| DTXSID4022448 | 51218-45-2  | Metolachlor              | Herbicides                        | Female      | 3.67E+06 | 9.40E+05 | 4.94E+07 |
| DTXSID1022265 | 15972-60-8  | Alachlor                 | Herbicides                        | Female      | 2.30E+06 | 1.43E+06 | 3.80E+06 |
| DTXSID2021284 | 100-42-5    | Styrene                  | Volatile Organic<br>Compounds     | 3 - 5 years | 1.98E+02 | 1.56E+02 | 2.11E+06 |

| DTXSID        | CAS        | Chemical                   | ChemicalClass                    | Population  | BER      | lowCI    | upCI     |
|---------------|------------|----------------------------|----------------------------------|-------------|----------|----------|----------|
| DTXSID1020431 | 106-46-7   | para-Dichlorobenzene       | Personal Care/Consumer Product   | 3 - 5 years | 4.60E+03 | 1.17E+04 | 1.37E+04 |
| DTXSID3020203 | 106-99-0   | 1,3-Butadiene              | Volatile Organic Compounds       | 3 - 5 years | 2.91E+02 | 6.95E+02 | 7.18E+02 |
| DTXSID5020029 | 107-13-1   | Acrylonitrile              | Volatile Organic Compounds       | 3 - 5 years | 5.51E+04 | 6.72E+04 | 7.96E+04 |
| DTXSID7021360 | 108-88-3   | Toulene                    | Volatile Organic Compounds       | 3 - 5 years | 5.12E+03 | 1.45E+04 | 1.54E+04 |
| DTXSID9022528 | 120-47-8   | Ethyl paraben              | Personal Care/Consumer Product   | 3 - 5 years | 3.87E+04 | 5.87E+04 | 7.74E+04 |
| DTXSID2021319 | 127-18-4   | Tetrachloroethene          | Volatile Organic Compounds       | 3 - 5 years | 6.03E+04 | 1.04E+04 | 2.27E+07 |
| DTXSID3024289 | 129-00-0   | Pyrene                     | Polycyclic Aromatic Hydrocarbons | 3 - 5 years | 4.53E+03 | 1.32E+04 | 1.43E+04 |
| DTXSID3022405 | 131-57-7   | Benzophenone-3             | Personal Care/Consumer Product   | 3 - 5 years | 1.09E+03 | 2.87E+03 | 3.39E+03 |
| DTXSID5032498 | 3380-34-5  | Triclosan                  | Personal Care/Consumer Product   | 3 - 5 years | 4.24E+03 | 7.08E+03 | 8.61E+03 |
| DTXSID9020247 | 63-25-2    | Carbaryl                   | Polycyclic Aromatic Hydrocarbons | 3 - 5 years | 1.53E+04 | 1.44E+04 | 2.30E+07 |
| DTXSID3039242 | 71-43-2    | Benzene                    | Volatile Organic Compounds       | 3 - 5 years | 7.80E+04 | 2.14E+05 | 2.34E+05 |
| DTXSID0021383 | 79-01-6    | Trichloroethene            | Volatile Organic Compounds       | 3 - 5 years | 5.54E+05 | 6.61E+04 | 4.23E+08 |
| DTXSID7020182 | 80-05-7    | Bisphenol A                | Personal Care/Consumer Product   | 3 - 5 years | 6.27E+03 | 2.25E+04 | 2.41E+04 |
| DTXSID3022409 | 80-09-1    | Bisphenol S                | Personal Care/Consumer Product   | 3 - 5 years | 3.90E+04 | 1.07E+05 | 1.18E+05 |
| DTXSID7021780 | 84-66-2    | Diethyl phthalate          | Phthalates                       | 3 - 5 years | 9.08E+02 | 1.63E+03 | 1.79E+03 |
| DTXSID9022522 | 84-69-5    | Di-isobutyl phthalate      | Phthalates                       | 3 - 5 years | 2.39E+03 | 8.40E+03 | 8.92E+03 |
| DTXSID2021781 | 84-74-2    | Dibutyl phthalate          | Phthalates                       | 3 - 5 years | 5.74E+03 | 1.76E+03 | 1.30E+07 |
| DTXSID8024105 | 86-73-7    | Fluorene                   | Polycyclic Aromatic Hydrocarbons | 3 - 5 years | 2.71E+04 | 4.36E+04 | 4.60E+04 |
| DTXSID8020913 | 91-20-3    | Naphthalene                | Polycyclic Aromatic Hydrocarbons | 3 - 5 years | 1.65E+04 | 2.45E+03 | 6.53E+07 |
| DTXSID4022527 | 94-13-3    | n-propyl paraben           | Personal Care/Consumer Product   | 3 - 5 years | 4.63E+03 | 1.09E+04 | 1.27E+04 |
| DTXSID3020209 | 94-26-8    | Butyl paraben              | Personal Care/Consumer Product   | 3 - 5 years | 6.23E+05 | 4.42E+05 | 1.70E+06 |
| DTXSID0020442 | 94-75-7    | 2,4-Dichlorophenoxyaceti   | Personal Care/Consumer Product   | 3 - 5 years | 1.41E+04 | 3.30E+03 | 8.93E+06 |
| DTXSID4022529 | 99-76-3    | Methyl paraben             | Personal Care/Consumer Product   | 3 - 5 years | 1.05E+03 | 2.28E+03 | 2.63E+03 |
| DTXSID5021411 | 115-96-8   | Tris(2-chloroethyl) phosph | Flame Retardant                  | 3 - 5 years |          | 2.92E+05 | 3.21E+05 |
| DTXSID3021986 | 126-73-8   | Tri-n-butyl phosphate (TB  | Flame Retardant                  | 3 - 5 years |          | 1.89E+03 | 2.04E+03 |
| DTXSID2021995 | 134-62-3   | N,N-Diethyl-3-methylbenz   | Insect Repellent                 | 3 - 5 years |          | 9.34E+05 | 8.33E+06 |
| DTXSID7022174 | 2104-64-5  | EPN                        | Organophosphorus Insecticides    | 3 - 5 years |          | 2.92E+03 | 2.25E+08 |
| DTXSID4020458 | 2921-88-2  | Chlorpyrifos               | Organophosphorus Insecticides    | 3 - 5 years |          | 5.77E+02 | 2.36E+07 |
| DTXSID1020855 | 298-00-0   | Methyl parathion           | Organophosphorus Insecticides    | 3 - 5 years |          | 4.13E+04 | 2.84E+09 |
| DTXSID9020407 | 333-41-5   | Diazinon                   | Organophosphorus Insecticides    | 3 - 5 years |          | 1.03E+06 | 1.42E+06 |
| DTXSID8022292 | 52645-53-1 | Permethrin                 | Pyrethroids                      | 3 - 5 years |          | 1.61E+05 | 8.59E+08 |
| DTXSID5035957 | 68359-37-5 | Cyfluthrin                 | Pyrethroids                      | 3 - 5 years |          | 1.45E+05 | 1.49E+06 |
| DTXSID3020964 | 98-95-3    | Nitrobenzene               | Organophosphorus Insecticides    | 3 - 5 years |          | 9.94E+04 | 6.01E+09 |

| DTXSID        | CAS         | Chemical                 | ChemicalClass                     | Population   | BER      | lowCI    | upCI     |
|---------------|-------------|--------------------------|-----------------------------------|--------------|----------|----------|----------|
| DTXSID4020791 | 121-75-5    | Malathion                | Organophosphorus<br>Insecticides  | 3 - 5 years  |          | 2.80E+04 | 3.34E+08 |
| DTXSID2022254 | 13071-79-9  | Terbufos                 | Organophosphorus<br>Insecticides  | 3 - 5 years  |          | 6.19E+04 | 5.57E+08 |
| DTXSID3022455 | 131-11-3    | Dimethyl phthalate       | Phthalates                        | 3 - 5 years  |          | 3.48E+04 | 4.04E+04 |
| DTXSID9023914 | 141-66-2    | Dicrotophos              | Organophosphorus<br>Insecticides  | 3 - 5 years  |          | 1.79E+04 | 2.40E+08 |
| DTXSID0024266 | 29232-93-7  | Pirimiphos-methyl        | Organophosphorus<br>Insecticides  | 3 - 5 years  |          | 1.17E+04 | 1.75E+08 |
| DTXSID4032459 | 298-02-2    | Phorate                  | Organophosphorus<br>Insecticides  | 3 - 5 years  |          | 1.90E+03 | 1.65E+07 |
| DTXSID7024328 | 3689-24-5   | Sulfotepp                | Organophosphorus<br>Insecticides  | 3 - 5 years  |          | 1.51E+04 | 2.13E+08 |
| DTXSID0021389 | 52-68-6     | Trichlorfon              | Organophosphorus<br>Insecticides  | 3 - 5 years  |          | 1.78E+04 | 3.55E+08 |
| DTXSID2032344 | 54593-83-8  | Chlorethoxyphos          | Organophosphorus<br>Insecticides  | 3 - 5 years  |          | 1.61E+04 | 2.05E+08 |
| DTXSID2020347 | 56-72-4     | Coumaphos                | Organophosphorus<br>Insecticides  | 3 - 5 years  |          | 2.09E+03 | 2.32E+07 |
| DTXSID2024086 | 563-12-2    | Ethion                   | Organophosphorus<br>Insecticides  | 3 - 5 years  |          | 5.85E+03 | 5.28E+07 |
| DTXSID7020479 | 60-51-5     | Dimethoate               | Organophosphorus<br>Insecticides  | 3 - 5 years  |          | 2.28E+04 | 3.01E+08 |
| DTXSID5020449 | 62-73-7     | Dichlorvos               | Organophosphorus<br>Insecticides  | 3 - 5 years  |          | 8.51E+03 | 1.48E+08 |
| DTXSID5024261 | 732-11-6    | Phosmet                  | Organophosphorus<br>Insecticides  | 3 - 5 years  |          | 2.02E+04 | 2.62E+08 |
| DTXSID3020122 | 86-50-0     | Azinphos methyl          | Organophosphorus<br>Insecticides  | 3 - 5 years  |          | 1.94E+04 | 2.27E+08 |
| DTXSID5020819 | 950-37-8    | Methidathion             | Organophosphorus<br>Insecticides  | 3 - 5 years  |          | 2.16E+04 | 2.30E+08 |
| DTXSID9022360 | 140-66-9    | 4-tert-Octylphenol       | Personal Care/Consumer<br>Product | 3 - 5 years  |          | 2.31E+04 | 2.87E+05 |
| DTXSID5022308 | 446-72-0    | Genistein                | Phytoestrogens                    | 3 - 5 years  |          | 1.33E+03 | 1.52E+03 |
| DTXSID9022310 | 486-66-8    | Daidzein                 | Phytoestrogens                    | 3 - 5 years  |          | 8.23E+02 | 9.20E+02 |
| DTXSID2020686 | 58-89-9     | Lindane                  | Fungicides                        | 3 - 5 years  |          | 6.21E+03 | 5.73E+07 |
| DTXSID7020687 | 608-73-1    | Hexachlorocyclohexane    | Fungicides                        | 3 - 5 years  |          | 6.48E+03 | 5.89E+07 |
| DTXSID7021106 | 87-86-5     | Pentachlorophenol        | Fungicides                        | 3 - 5 years  |          | 1.22E+04 | 1.84E+08 |
| DTXSID2021151 | 90-43-7     | ortho-Phenylphenol       | Fungicides                        | 3 - 5 years  |          | 2.72E+04 | 3.44E+04 |
| DTXSID5021388 | 93-76-5     | 2,4,5-Trichlorophenoxyac | Herbicides                        | 3 - 5 years  |          | 1.63E+05 | 3.54E+07 |
| DTXSID1032642 | 122931-48-0 | Rimsulfuron              | Sulfonyl Urea Herbicides          | 3 - 5 years  |          | 1.83E+07 | 2.47E+11 |
| DTXSID4034364 | 144651-06-9 | Oxasulfuron              | Sulfonyl Urea Herbicides          | 3 - 5 years  |          | 2.43E+07 | 3.59E+11 |
| DTXSID7034753 | 173159-57-4 | Foramsulfuron            | Sulfonyl Urea Herbicides          | 3 - 5 years  |          | 1.13E+07 | 1.07E+11 |
| DTXSID9020112 | 1912-24-9   | Atrazine                 | Herbicides                        | 3 - 5 years  |          | 1.83E+05 | 6.71E+07 |
| DTXSID8023846 | 30560-19-1  | Acephate                 | Organophosphorus<br>Insecticides  | 3 - 5 years  |          | 3.87E+05 | 1.68E+07 |
| DTXSID6023864 | 74223-64-6  | Metsulfuron-methyl       | Sulfonyl Urea Herbicides          | 3 - 5 years  |          | 1.01E+07 | 4.56E+09 |
| DTXSID7024164 | 83055-99-6  | Bensulfuron-methyl       | Sulfonyl Urea Herbicides          | 3 - 5 years  |          | 1.44E+07 | 1.63E+11 |
| DTXSID9034573 | 97780-06-8  | Ethametsulfuron-methyl   | Sulfonyl Urea Herbicides          | 3 - 5 years  |          | 3.36E+06 | 3.54E+10 |
| DTXSID7021948 | 114-26-1    | Propoxur                 | Carbamate Pesticides              | 3 - 5 years  |          | 2.53E+06 | 3.16E+11 |
| DTXSID9020249 | 1563-66-2   | Carbofuran               | Carbamate Pesticides              | 3 - 5 years  |          | 3.36E+05 | 3.56E+10 |
| DTXSID8023848 | 34256-82-1  | Acetochlor               | Unknown                           | 3 - 5 years  |          | 2.07E+06 | 1.41E+08 |
| DTXSID4022448 | 51218-45-2  | Metolachlor              | Herbicides                        | 3 - 5 years  |          | 9.40E+05 | 4.94E+07 |
| DTXSID1022265 | 15972-60-8  | Alachlor                 | Herbicides                        | 3 - 5 years  |          | 1.43E+06 | 3.80E+06 |
| DTXSID2021284 | 100-42-5    | Styrene                  | Volatile Organic<br>Compounds     | 6 - 11 years | 3.85E+02 | 1.56E+02 | 2.11E+06 |
| DTXSID1020431 | 106-46-7    | para-Dichlorobenzene     | Personal Care/Consumer<br>Product | 6 - 11 years | 6.57E+03 | 1.17E+04 | 1.37E+04 |

| DTXSID        | CAS        | Chemical                        | ChemicalClass                    | Population   | BER      | lowCI    | upCI     |
|---------------|------------|---------------------------------|----------------------------------|--------------|----------|----------|----------|
| DTXSID3020203 | 106-99-0   | 1,3-Butadiene                   | Volatile Organic Compounds       | 6 - 11 years | 4.81E+02 | 6.95E+02 | 7.18E+02 |
| DTXSID5020029 | 107-13-1   | Acrylonitrile                   | Volatile Organic Compounds       | 6 - 11 years | 9.22E+04 | 6.72E+04 | 7.96E+04 |
| DTXSID7021360 | 108-88-3   | Toulene                         | Volatile Organic Compounds       | 6 - 11 years | 1.07E+04 | 1.45E+04 | 1.54E+04 |
| DTXSID9022528 | 120-47-8   | Ethyl paraben                   | Personal Care/Consumer Product   | 6 - 11 years | 1.01E+05 | 5.87E+04 | 7.74E+04 |
| DTXSID2021319 | 127-18-4   | Tetrachloroethene               | Volatile Organic Compounds       | 6 - 11 years | 5.65E+04 | 1.04E+04 | 2.27E+07 |
| DTXSID3024289 | 129-00-0   | Pyrene                          | Polycyclic Aromatic Hydrocarbons | 6 - 11 years | 7.68E+03 | 1.32E+04 | 1.43E+04 |
| DTXSID3022405 | 131-57-7   | Benzophenone-3                  | Personal Care/Consumer Product   | 6 - 11 years | 1.95E+03 | 2.87E+03 | 3.39E+03 |
| DTXSID5032498 | 3380-34-5  | Triclosan                       | Personal Care/Consumer Product   | 6 - 11 years | 5.91E+03 | 7.08E+03 | 8.61E+03 |
| DTXSID9020247 | 63-25-2    | Carbaryl                        | Polycyclic Aromatic Hydrocarbons | 6 - 11 years | 2.70E+04 | 1.44E+04 | 2.30E+07 |
| DTXSID3039242 | 71-43-2    | Benzene                         | Volatile Organic Compounds       | 6 - 11 years | 1.27E+05 | 2.14E+05 | 2.34E+05 |
| DTXSID0021383 | 79-01-6    | Trichloroethene                 | Volatile Organic Compounds       | 6 - 11 years | 5.86E+05 | 6.61E+04 | 4.23E+08 |
| DTXSID7020182 | 80-05-7    | Bisphenol A                     | Personal Care/Consumer Product   | 6 - 11 years | 1.45E+04 | 2.25E+04 | 2.41E+04 |
| DTXSID3022409 | 80-09-1    | Bisphenol S                     | Personal Care/Consumer Product   | 6 - 11 years | 9.47E+04 | 1.07E+05 | 1.18E+05 |
| DTXSID7021780 | 84-66-2    | Diethyl phthalate               | Phthalates                       | 6 - 11 years | 1.58E+03 | 1.63E+03 | 1.79E+03 |
| DTXSID9022522 | 84-69-5    | Di-isobutyl phthalate           | Phthalates                       | 6 - 11 years | 4.39E+03 | 8.40E+03 | 8.92E+03 |
| DTXSID2021781 | 84-74-2    | Dibutyl phthalate               | Phthalates                       | 6 - 11 years | 8.99E+03 | 1.76E+03 | 1.30E+07 |
| DTXSID8024105 | 86-73-7    | Fluorene                        | Polycyclic Aromatic Hydrocarbons | 6 - 11 years | 4.22E+04 | 4.36E+04 | 4.60E+04 |
| DTXSID8020913 | 91-20-3    | Naphthalene                     | Polycyclic Aromatic Hydrocarbons | 6 - 11 years | 2.86E+04 | 2.45E+03 | 6.53E+07 |
| DTXSID4022527 | 94-13-3    | n-propyl paraben                | Personal Care/Consumer Product   | 6 - 11 years | 1.56E+04 | 1.09E+04 | 1.27E+04 |
| DTXSID3020209 | 94-26-8    | Butyl paraben                   | Personal Care/Consumer Product   | 6 - 11 years | 6.32E+05 | 4.42E+05 | 1.70E+06 |
| DTXSID0020442 | 94-75-7    | 2,4-Dichlorophenoxyacetic acid  | Personal Care/Consumer Product   | 6 - 11 years | 2.17E+04 | 3.30E+03 | 8.93E+06 |
| DTXSID4022529 | 99-76-3    | Methyl paraben                  | Personal Care/Consumer Product   | 6 - 11 years | 3.01E+03 | 2.28E+03 | 2.63E+03 |
| DTXSID5021411 | 115-96-8   | Tris(2-chloroethyl) phosphite   | Flame Retardant                  | 6 - 11 years | 1.28E+05 | 2.92E+05 | 3.21E+05 |
| DTXSID3021986 | 126-73-8   | Tri-n-butyl phosphate (TBP)     | Flame Retardant                  | 6 - 11 years | 9.47E+02 | 1.89E+03 | 2.04E+03 |
| DTXSID2021995 | 134-62-3   | N,N-Diethyl-3-methylbenzylamine | Insect Repellent                 | 6 - 11 years | 1.27E+06 | 9.34E+05 | 8.33E+06 |
| DTXSID7022174 | 2104-64-5  | EPN                             | Organophosphorus Insecticides    | 6 - 11 years | 4.48E+04 | 2.92E+03 | 2.25E+08 |
| DTXSID4020458 | 2921-88-2  | Chlorpyrifos                    | Organophosphorus Insecticides    | 6 - 11 years | 2.22E+03 | 5.77E+02 | 2.36E+07 |
| DTXSID1020855 | 298-00-0   | Methyl parathion                | Organophosphorus Insecticides    | 6 - 11 years | 7.07E+05 | 4.13E+04 | 2.84E+09 |
| DTXSID9020407 | 333-41-5   | Diazinon                        | Organophosphorus Insecticides    | 6 - 11 years | 4.81E+05 | 1.03E+06 | 1.42E+06 |
| DTXSID8022292 | 52645-53-1 | Permethrin                      | Pyrethroids                      | 6 - 11 years | 1.59E+05 | 1.61E+05 | 8.59E+08 |
| DTXSID5035957 | 68359-37-5 | Cyfluthrin                      | Pyrethroids                      | 6 - 11 years | 1.93E+05 | 1.45E+05 | 1.49E+06 |
| DTXSID3020964 | 98-95-3    | Nitrobenzene                    | Organophosphorus Insecticides    | 6 - 11 years | 1.52E+06 | 9.94E+04 | 6.01E+09 |
| DTXSID4020791 | 121-75-5   | Malathion                       | Organophosphorus Insecticides    | 6 - 11 years | 3.72E+05 | 2.80E+04 | 3.34E+08 |

| DTXSID        | CAS         | Chemical                 | ChemicalClass                     | Population    | BER      | lowCI    | upCI     |
|---------------|-------------|--------------------------|-----------------------------------|---------------|----------|----------|----------|
| DTXSID2022254 | 13071-79-9  | Terbufos                 | Organophosphorus<br>Insecticides  | 6 - 11 years  | 1.84E+06 | 6.19E+04 | 5.57E+08 |
| DTXSID3022455 | 131-11-3    | Dimethyl phthalate       | Phthalates                        | 6 - 11 years  | 1.10E+04 | 3.48E+04 | 4.04E+04 |
| DTXSID9023914 | 141-66-2    | Dicrotophos              | Organophosphorus<br>Insecticides  | 6 - 11 years  | 2.24E+05 | 1.79E+04 | 2.40E+08 |
| DTXSID0024266 | 29232-93-7  | Pirimiphos-methyl        | Organophosphorus<br>Insecticides  | 6 - 11 years  | 1.71E+05 | 1.17E+04 | 1.75E+08 |
| DTXSID4032459 | 298-02-2    | Phorate                  | Organophosphorus<br>Insecticides  | 6 - 11 years  | 5.08E+04 | 1.90E+03 | 1.65E+07 |
| DTXSID7024328 | 3689-24-5   | Sulfotepp                | Organophosphorus<br>Insecticides  | 6 - 11 years  | 1.21E+05 | 1.51E+04 | 2.13E+08 |
| DTXSID0021389 | 52-68-6     | Trichlorfon              | Organophosphorus<br>Insecticides  | 6 - 11 years  | 2.18E+05 | 1.78E+04 | 3.55E+08 |
| DTXSID2032344 | 54593-83-8  | Chlorethoxyphos          | Organophosphorus<br>Insecticides  | 6 - 11 years  | 1.36E+05 | 1.61E+04 | 2.05E+08 |
| DTXSID2020347 | 56-72-4     | Coumaphos                | Organophosphorus<br>Insecticides  | 6 - 11 years  | 1.54E+04 | 2.09E+03 | 2.32E+07 |
| DTXSID2024086 | 563-12-2    | Ethion                   | Organophosphorus<br>Insecticides  | 6 - 11 years  | 1.88E+05 | 5.85E+03 | 5.28E+07 |
| DTXSID7020479 | 60-51-5     | Dimethoate               | Organophosphorus<br>Insecticides  | 6 - 11 years  | 3.51E+05 | 2.28E+04 | 3.01E+08 |
| DTXSID5020449 | 62-73-7     | Dichlorvos               | Organophosphorus<br>Insecticides  | 6 - 11 years  | 1.26E+05 | 8.51E+03 | 1.48E+08 |
| DTXSID5024261 | 732-11-6    | Phosmet                  | Organophosphorus<br>Insecticides  | 6 - 11 years  | 2.79E+05 | 2.02E+04 | 2.62E+08 |
| DTXSID3020122 | 86-50-0     | Azinphos methyl          | Organophosphorus<br>Insecticides  | 6 - 11 years  | 2.33E+05 | 1.94E+04 | 2.27E+08 |
| DTXSID5020819 | 950-37-8    | Methidathion             | Organophosphorus<br>Insecticides  | 6 - 11 years  | 3.26E+05 | 2.16E+04 | 2.30E+08 |
| DTXSID9022360 | 140-66-9    | 4-tert-Octylphenol       | Personal Care/Consumer<br>Product | 6 - 11 years  | 3.28E+04 | 2.31E+04 | 2.87E+05 |
| DTXSID5022308 | 446-72-0    | Genistein                | Phytoestrogens                    | 6 - 11 years  | 6.72E+02 | 1.33E+03 | 1.52E+03 |
| DTXSID9022310 | 486-66-8    | Daidzein                 | Phytoestrogens                    | 6 - 11 years  | 3.66E+02 | 8.23E+02 | 9.20E+02 |
| DTXSID2020686 | 58-89-9     | Lindane                  | Fungicides                        | 6 - 11 years  | 1.36E+05 | 6.21E+03 | 5.73E+07 |
| DTXSID7020687 | 608-73-1    | Hexachlorocyclohexane    | Fungicides                        | 6 - 11 years  | 1.59E+05 | 6.48E+03 | 5.89E+07 |
| DTXSID7021106 | 87-86-5     | Pentachlorophenol        | Fungicides                        | 6 - 11 years  | 2.91E+05 | 1.22E+04 | 1.84E+08 |
| DTXSID2021151 | 90-43-7     | ortho-Phenylphenol       | Fungicides                        | 6 - 11 years  | 1.43E+04 | 2.72E+04 | 3.44E+04 |
| DTXSID5021388 | 93-76-5     | 2,4,5-Trichlorophenoxyac | Herbicides                        | 6 - 11 years  | 3.39E+05 | 1.63E+05 | 3.54E+07 |
| DTXSID1032642 | 122931-48-0 | Rimsulfuron              | Sulfonyl Urea Herbicides          | 6 - 11 years  | 2.21E+08 | 1.83E+07 | 2.47E+11 |
| DTXSID4034364 | 144651-06-9 | Oxasulfuron              | Sulfonyl Urea Herbicides          | 6 - 11 years  | 2.54E+08 | 2.43E+07 | 3.59E+11 |
| DTXSID7034753 | 173159-57-4 | Foramsulfuron            | Sulfonyl Urea Herbicides          | 6 - 11 years  | 1.58E+08 | 1.13E+07 | 1.07E+11 |
| DTXSID9020112 | 1912-24-9   | Atrazine                 | Herbicides                        | 6 - 11 years  | 9.47E+06 | 1.83E+05 | 6.71E+07 |
| DTXSID8023846 | 30560-19-1  | Acephate                 | Organophosphorus<br>Insecticides  | 6 - 11 years  | 1.24E+06 | 3.87E+05 | 1.68E+07 |
| DTXSID6023864 | 74223-64-6  | Metsulfuron-methyl       | Sulfonyl Urea Herbicides          | 6 - 11 years  | 2.42E+08 | 1.01E+07 | 4.56E+09 |
| DTXSID7024164 | 83055-99-6  | Bensulfuron-methyl       | Sulfonyl Urea Herbicides          | 6 - 11 years  | 1.67E+08 | 1.44E+07 | 1.63E+11 |
| DTXSID9034573 | 97780-06-8  | Ethametsulfuron-methyl   | Sulfonyl Urea Herbicides          | 6 - 11 years  | 4.30E+07 | 3.36E+06 | 3.54E+10 |
| DTXSID7021948 | 114-26-1    | Propoxur                 | Carbamate Pesticides              | 6 - 11 years  | 7.77E+07 | 2.53E+06 | 3.16E+11 |
| DTXSID9020249 | 1563-66-2   | Carbofuran               | Carbamate Pesticides              | 6 - 11 years  | 9.27E+06 | 3.36E+05 | 3.56E+10 |
| DTXSID8023848 | 34256-82-1  | Acetochlor               | Unknown                           | 6 - 11 years  | 5.83E+06 | 2.07E+06 | 1.41E+08 |
| DTXSID4022448 | 51218-45-2  | Metolachlor              | Herbicides                        | 6 - 11 years  | 3.19E+06 | 9.40E+05 | 4.94E+07 |
| DTXSID1022265 | 15972-60-8  | Alachlor                 | Herbicides                        | 6 - 11 years  | 1.83E+06 | 1.43E+06 | 3.80E+06 |
| DTXSID2021284 | 100-42-5    | Styrene                  | Volatile Organic<br>Compounds     | 12 - 19 years | 1.37E+03 | 1.56E+02 | 2.11E+06 |
| DTXSID1020431 | 106-46-7    | para-Dichlorobenzene     | Personal Care/Consumer<br>Product | 12 - 19 years | 8.61E+03 | 1.17E+04 | 1.37E+04 |
| DTXSID3020203 | 106-99-0    | 1,3-Butadiene            | Volatile Organic<br>Compounds     | 12 - 19 years | 7.35E+02 | 6.95E+02 | 7.18E+02 |

| DTXSID        | CAS        | Chemical                        | ChemicalClass                    | Population    | BER      | lowCI    | upCI     |
|---------------|------------|---------------------------------|----------------------------------|---------------|----------|----------|----------|
| DTXSID5020029 | 107-13-1   | Acrylonitrile                   | Volatile Organic Compounds       | 12 - 19 years | 1.25E+05 | 6.72E+04 | 7.96E+04 |
| DTXSID7021360 | 108-88-3   | Toulene                         | Volatile Organic Compounds       | 12 - 19 years | 1.80E+04 | 1.45E+04 | 1.54E+04 |
| DTXSID9022528 | 120-47-8   | Ethyl paraben                   | Personal Care/Consumer Product   | 12 - 19 years | 1.27E+05 | 5.87E+04 | 7.74E+04 |
| DTXSID2021319 | 127-18-4   | Tetrachloroethene               | Volatile Organic Compounds       | 12 - 19 years | 6.47E+04 | 1.04E+04 | 2.27E+07 |
| DTXSID3024289 | 129-00-0   | Pyrene                          | Polycyclic Aromatic Hydrocarbons | 12 - 19 years | 1.37E+04 | 1.32E+04 | 1.43E+04 |
| DTXSID3022405 | 131-57-7   | Benzophenone-3                  | Personal Care/Consumer Product   | 12 - 19 years | 4.30E+03 | 2.87E+03 | 3.39E+03 |
| DTXSID5032498 | 3380-34-5  | Triclosan                       | Personal Care/Consumer Product   | 12 - 19 years | 1.05E+04 | 7.08E+03 | 8.61E+03 |
| DTXSID9020247 | 63-25-2    | Carbaryl                        | Polycyclic Aromatic Hydrocarbons | 12 - 19 years | 4.08E+04 | 1.44E+04 | 2.30E+07 |
| DTXSID3039242 | 71-43-2    | Benzene                         | Volatile Organic Compounds       | 12 - 19 years | 1.91E+05 | 2.14E+05 | 2.34E+05 |
| DTXSID0021383 | 79-01-6    | Trichloroethene                 | Volatile Organic Compounds       | 12 - 19 years | 6.67E+05 | 6.61E+04 | 4.23E+08 |
| DTXSID7020182 | 80-05-7    | Bisphenol A                     | Personal Care/Consumer Product   | 12 - 19 years | 2.51E+04 | 2.25E+04 | 2.41E+04 |
| DTXSID3022409 | 80-09-1    | Bisphenol S                     | Personal Care/Consumer Product   | 12 - 19 years | 1.70E+05 | 1.07E+05 | 1.18E+05 |
| DTXSID7021780 | 84-66-2    | Diethyl phthalate               | Phthalates                       | 12 - 19 years | 1.97E+03 | 1.63E+03 | 1.79E+03 |
| DTXSID9022522 | 84-69-5    | Di-isobutyl phthalate           | Phthalates                       | 12 - 19 years | 8.52E+03 | 8.40E+03 | 8.92E+03 |
| DTXSID2021781 | 84-74-2    | Dibutyl phthalate               | Phthalates                       | 12 - 19 years | 1.14E+04 | 1.76E+03 | 1.30E+07 |
| DTXSID8024105 | 86-73-7    | Fluorene                        | Polycyclic Aromatic Hydrocarbons | 12 - 19 years | 5.87E+04 | 4.36E+04 | 4.60E+04 |
| DTXSID8020913 | 91-20-3    | Naphthalene                     | Polycyclic Aromatic Hydrocarbons | 12 - 19 years | 4.76E+04 | 2.45E+03 | 6.53E+07 |
| DTXSID4022527 | 94-13-3    | n-propyl paraben                | Personal Care/Consumer Product   | 12 - 19 years | 1.91E+04 | 1.09E+04 | 1.27E+04 |
| DTXSID3020209 | 94-26-8    | Butyl paraben                   | Personal Care/Consumer Product   | 12 - 19 years | 6.59E+05 | 4.42E+05 | 1.70E+06 |
| DTXSID0020442 | 94-75-7    | 2,4-Dichlorophenoxyacetic acid  | Personal Care/Consumer Product   | 12 - 19 years | 3.05E+04 | 3.30E+03 | 8.93E+06 |
| DTXSID4022529 | 99-76-3    | Methyl paraben                  | Personal Care/Consumer Product   | 12 - 19 years | 3.87E+03 | 2.28E+03 | 2.63E+03 |
| DTXSID5021411 | 115-96-8   | Tris(2-chloroethyl) phosphite   | Flame Retardant                  | 12 - 19 years | 2.32E+05 | 2.92E+05 | 3.21E+05 |
| DTXSID3021986 | 126-73-8   | Tri-n-butyl phosphate (TBP)     | Flame Retardant                  | 12 - 19 years | 1.97E+03 | 1.89E+03 | 2.04E+03 |
| DTXSID2021995 | 134-62-3   | N,N-Diethyl-3-methylbenzylamine | Insect Repellent                 | 12 - 19 years | 1.38E+06 | 9.34E+05 | 8.33E+06 |
| DTXSID7022174 | 2104-64-5  | EPN                             | Organophosphorus Insecticides    | 12 - 19 years | 8.23E+04 | 2.92E+03 | 2.25E+08 |
| DTXSID4020458 | 2921-88-2  | Chlorpyrifos                    | Organophosphorus Insecticides    | 12 - 19 years | 4.58E+03 | 5.77E+02 | 2.36E+07 |
| DTXSID1020855 | 298-00-0   | Methyl parathion                | Organophosphorus Insecticides    | 12 - 19 years | 1.10E+06 | 4.13E+04 | 2.84E+09 |
| DTXSID9020407 | 333-41-5   | Diazinon                        | Organophosphorus Insecticides    | 12 - 19 years | 1.06E+06 | 1.03E+06 | 1.42E+06 |
| DTXSID8022292 | 52645-53-1 | Permethrin                      | Pyrethroids                      | 12 - 19 years | 1.95E+05 | 1.61E+05 | 8.59E+08 |
| DTXSID5035957 | 68359-37-5 | Cyfluthrin                      | Pyrethroids                      | 12 - 19 years | 2.70E+05 | 1.45E+05 | 1.49E+06 |
| DTXSID3020964 | 98-95-3    | Nitrobenzene                    | Organophosphorus Insecticides    | 12 - 19 years | 2.80E+06 | 9.94E+04 | 6.01E+09 |
| DTXSID4020791 | 121-75-5   | Malathion                       | Organophosphorus Insecticides    | 12 - 19 years | 8.84E+05 | 2.80E+04 | 3.34E+08 |
| DTXSID2022254 | 13071-79-9 | Terbufos                        | Organophosphorus Insecticides    | 12 - 19 years | 1.66E+06 | 6.19E+04 | 5.57E+08 |



| DTXSID        | CAS         | Chemical                          | ChemicalClass                     | Population    | BER      | lowCI    | upCI     |
|---------------|-------------|-----------------------------------|-----------------------------------|---------------|----------|----------|----------|
| DTXSID3022455 | 131-11-3    | Dimethyl phthalate                | Phthalates                        | 12 - 19 years | 2.98E+04 | 3.48E+04 | 4.04E+04 |
| DTXSID9023914 | 141-66-2    | Dicrotophos                       | Organophosphorus<br>Insecticides  | 12 - 19 years | 3.69E+05 | 1.79E+04 | 2.40E+08 |
| DTXSID0024266 | 29232-93-7  | Pirimiphos-methyl                 | Organophosphorus<br>Insecticides  | 12 - 19 years | 2.82E+05 | 1.17E+04 | 1.75E+08 |
| DTXSID4032459 | 298-02-2    | Phorate                           | Organophosphorus<br>Insecticides  | 12 - 19 years | 5.01E+04 | 1.90E+03 | 1.65E+07 |
| DTXSID7024328 | 3689-24-5   | Sulfotepp                         | Organophosphorus<br>Insecticides  | 12 - 19 years | 2.26E+05 | 1.51E+04 | 2.13E+08 |
| DTXSID0021389 | 52-68-6     | Trichlorfon                       | Organophosphorus<br>Insecticides  | 12 - 19 years | 4.40E+05 | 1.78E+04 | 3.55E+08 |
| DTXSID2032344 | 54593-83-8  | Chlorethoxyphos                   | Organophosphorus<br>Insecticides  | 12 - 19 years | 2.54E+05 | 1.61E+04 | 2.05E+08 |
| DTXSID2020347 | 56-72-4     | Coumaphos                         | Organophosphorus<br>Insecticides  | 12 - 19 years | 3.12E+04 | 2.09E+03 | 2.32E+07 |
| DTXSID2024086 | 563-12-2    | Ethion                            | Organophosphorus<br>Insecticides  | 12 - 19 years | 1.89E+05 | 5.85E+03 | 5.28E+07 |
| DTXSID7020479 | 60-51-5     | Dimethoate                        | Organophosphorus<br>Insecticides  | 12 - 19 years | 6.33E+05 | 2.28E+04 | 3.01E+08 |
| DTXSID5020449 | 62-73-7     | Dichlorvos                        | Organophosphorus<br>Insecticides  | 12 - 19 years | 1.94E+05 | 8.51E+03 | 1.48E+08 |
| DTXSID5024261 | 732-11-6    | Phosmet                           | Organophosphorus<br>Insecticides  | 12 - 19 years | 4.96E+05 | 2.02E+04 | 2.62E+08 |
| DTXSID3020122 | 86-50-0     | Azinphos methyl                   | Organophosphorus<br>Insecticides  | 12 - 19 years | 4.97E+05 | 1.94E+04 | 2.27E+08 |
| DTXSID5020819 | 950-37-8    | Methidathion                      | Organophosphorus<br>Insecticides  | 12 - 19 years | 5.48E+05 | 2.16E+04 | 2.30E+08 |
| DTXSID9022360 | 140-66-9    | 4-tert-Octylphenol                | Personal Care/Consumer<br>Product | 12 - 19 years | 3.89E+04 | 2.31E+04 | 2.87E+05 |
| DTXSID5022308 | 446-72-0    | Genistein                         | Phytoestrogens                    | 12 - 19 years | 1.21E+03 | 1.33E+03 | 1.52E+03 |
| DTXSID9022310 | 486-66-8    | Daidzein                          | Phytoestrogens                    | 12 - 19 years | 6.59E+02 | 8.23E+02 | 9.20E+02 |
| DTXSID2020686 | 58-89-9     | Lindane                           | Fungicides                        | 12 - 19 years | 1.67E+05 | 6.21E+03 | 5.73E+07 |
| DTXSID7020687 | 608-73-1    | Hexachlorocyclohexane             | Fungicides                        | 12 - 19 years | 1.80E+05 | 6.48E+03 | 5.89E+07 |
| DTXSID7021106 | 87-86-5     | Pentachlorophenol                 | Fungicides                        | 12 - 19 years | 3.64E+05 | 1.22E+04 | 1.84E+08 |
| DTXSID2021151 | 90-43-7     | ortho-Phenylphenol                | Fungicides                        | 12 - 19 years | 2.11E+04 | 2.72E+04 | 3.44E+04 |
| DTXSID5021388 | 93-76-5     | 2,4,5-Trichlorophenoxyacetic acid | Herbicides                        | 12 - 19 years | 2.27E+06 | 1.63E+05 | 3.54E+07 |
| DTXSID1032642 | 122931-48-0 | Rimsulfuron                       | Sulfonyl Urea Herbicides          | 12 - 19 years | 2.24E+08 | 1.83E+07 | 2.47E+11 |
| DTXSID4034364 | 144651-06-9 | Oxasulfuron                       | Sulfonyl Urea Herbicides          | 12 - 19 years | 3.27E+08 | 2.43E+07 | 3.59E+11 |
| DTXSID7034753 | 173159-57-4 | Foramsulfuron                     | Sulfonyl Urea Herbicides          | 12 - 19 years | 1.35E+08 | 1.13E+07 | 1.07E+11 |
| DTXSID9020112 | 1912-24-9   | Atrazine                          | Herbicides                        | 12 - 19 years | 1.10E+07 | 1.83E+05 | 6.71E+07 |
| DTXSID8023846 | 30560-19-1  | Acephate                          | Organophosphorus<br>Insecticides  | 12 - 19 years | 9.84E+05 | 3.87E+05 | 1.68E+07 |
| DTXSID6023864 | 74223-64-6  | Metsulfuron-methyl                | Sulfonyl Urea Herbicides          | 12 - 19 years | 2.29E+08 | 1.01E+07 | 4.56E+09 |
| DTXSID7024164 | 83055-99-6  | Bensulfuron-methyl                | Sulfonyl Urea Herbicides          | 12 - 19 years | 1.68E+08 | 1.44E+07 | 1.63E+11 |
| DTXSID9034573 | 97780-06-8  | Ethametsulfuron-methyl            | Sulfonyl Urea Herbicides          | 12 - 19 years | 3.97E+07 | 3.36E+06 | 3.54E+10 |
| DTXSID7021948 | 114-26-1    | Propoxur                          | Carbamate Pesticides              | 12 - 19 years | 1.12E+08 | 2.53E+06 | 3.16E+11 |
| DTXSID9020249 | 1563-66-2   | Carbofuran                        | Carbamate Pesticides              | 12 - 19 years | 9.01E+06 | 3.36E+05 | 3.56E+10 |
| DTXSID8023848 | 34256-82-1  | Acetochlor                        | Unknown                           | 12 - 19 years | 6.30E+06 | 2.07E+06 | 1.41E+08 |
| DTXSID4022448 | 51218-45-2  | Metolachlor                       | Herbicides                        | 12 - 19 years | 2.85E+06 | 9.40E+05 | 4.94E+07 |
| DTXSID1022265 | 15972-60-8  | Alachlor                          | Herbicides                        | 12 - 19 years | 2.31E+06 | 1.43E+06 | 3.80E+06 |
| DTXSID2021284 | 100-42-5    | Styrene                           | Organophosphorus<br>Compounds     | 20 - 65 years | 1.76E+02 | 1.56E+02 | 2.11E+06 |
| DTXSID1020431 | 106-46-7    | para-Dichlorobenzene              | Personal Care/Consumer<br>Product | 20 - 65 years | 1.38E+04 | 1.17E+04 | 1.37E+04 |
| DTXSID3020203 | 106-99-0    | 1,3-Butadiene                     | Organophosphorus<br>Compounds     | 20 - 65 years | 7.42E+02 | 6.95E+02 | 7.18E+02 |
| DTXSID5020029 | 107-13-1    | Acrylonitrile                     | Organophosphorus<br>Compounds     | 20 - 65 years | 5.49E+04 | 6.72E+04 | 7.96E+04 |

| DTXSID        | CAS        | Chemical                        | ChemicalClass                    | Population    | BER      | lowCI    | upCI     |
|---------------|------------|---------------------------------|----------------------------------|---------------|----------|----------|----------|
| DTXSID7021360 | 108-88-3   | Toulene                         | Volatile Organic Compounds       | 20 - 65 years | 1.53E+04 | 1.45E+04 | 1.54E+04 |
| DTXSID9022528 | 120-47-8   | Ethyl paraben                   | Personal Care/Consumer Product   | 20 - 65 years | 4.91E+04 | 5.87E+04 | 7.74E+04 |
| DTXSID2021319 | 127-18-4   | Tetrachloroethene               | Volatile Organic Compounds       | 20 - 65 years | 9.83E+04 | 1.04E+04 | 2.27E+07 |
| DTXSID3024289 | 129-00-0   | Pyrene                          | Polycyclic Aromatic Hydrocarbons | 20 - 65 years | 1.28E+04 | 1.32E+04 | 1.43E+04 |
| DTXSID3022405 | 131-57-7   | Benzophenone-3                  | Personal Care/Consumer Product   | 20 - 65 years | 2.97E+03 | 2.87E+03 | 3.39E+03 |
| DTXSID5032498 | 3380-34-5  | Triclosan                       | Personal Care/Consumer Product   | 20 - 65 years | 7.66E+03 | 7.08E+03 | 8.61E+03 |
| DTXSID9020247 | 63-25-2    | Carbaryl                        | Polycyclic Aromatic Hydrocarbons | 20 - 65 years | 2.18E+04 | 1.44E+04 | 2.30E+07 |
| DTXSID3039242 | 71-43-2    | Benzene                         | Volatile Organic Compounds       | 20 - 65 years | 2.28E+05 | 2.14E+05 | 2.34E+05 |
| DTXSID0021383 | 79-01-6    | Trichloroethene                 | Volatile Organic Compounds       | 20 - 65 years | 9.93E+05 | 6.61E+04 | 4.23E+08 |
| DTXSID7020182 | 80-05-7    | Bisphenol A                     | Personal Care/Consumer Product   | 20 - 65 years | 2.26E+04 | 2.25E+04 | 2.41E+04 |
| DTXSID3022409 | 80-09-1    | Bisphenol S                     | Personal Care/Consumer Product   | 20 - 65 years | 9.83E+04 | 1.07E+05 | 1.18E+05 |
| DTXSID7021780 | 84-66-2    | Diethyl phthalate               | Phthalates                       | 20 - 65 years | 1.70E+03 | 1.63E+03 | 1.79E+03 |
| DTXSID9022522 | 84-69-5    | Di-isobutyl phthalate           | Phthalates                       | 20 - 65 years | 9.20E+03 | 8.40E+03 | 8.92E+03 |
| DTXSID2021781 | 84-74-2    | Dibutyl phthalate               | Phthalates                       | 20 - 65 years | 9.92E+03 | 1.76E+03 | 1.30E+07 |
| DTXSID8024105 | 86-73-7    | Fluorene                        | Polycyclic Aromatic Hydrocarbons | 20 - 65 years | 3.94E+04 | 4.36E+04 | 4.60E+04 |
| DTXSID8020913 | 91-20-3    | Naphthalene                     | Polycyclic Aromatic Hydrocarbons | 20 - 65 years | 2.36E+04 | 2.45E+03 | 6.53E+07 |
| DTXSID4022527 | 94-13-3    | n-propyl paraben                | Personal Care/Consumer Product   | 20 - 65 years | 1.07E+04 | 1.09E+04 | 1.27E+04 |
| DTXSID3020209 | 94-26-8    | Butyl paraben                   | Personal Care/Consumer Product   | 20 - 65 years | 5.48E+05 | 4.42E+05 | 1.70E+06 |
| DTXSID0020442 | 94-75-7    | 2,4-Dichlorophenoxyacetic acid  | Personal Care/Consumer Product   | 20 - 65 years | 4.00E+04 | 3.30E+03 | 8.93E+06 |
| DTXSID4022529 | 99-76-3    | Methyl paraben                  | Personal Care/Consumer Product   | 20 - 65 years | 2.22E+03 | 2.28E+03 | 2.63E+03 |
| DTXSID5021411 | 115-96-8   | Tris(2-chloroethyl) phosphite   | Flame Retardant                  | 20 - 65 years | 3.36E+05 | 2.92E+05 | 3.21E+05 |
| DTXSID3021986 | 126-73-8   | Tri-n-butyl phosphate (TBP)     | Flame Retardant                  | 20 - 65 years | 2.12E+03 | 1.89E+03 | 2.04E+03 |
| DTXSID2021995 | 134-62-3   | N,N-Diethyl-3-methylbenzylamine | Insect Repellent                 | 20 - 65 years | 1.63E+06 | 9.34E+05 | 8.33E+06 |
| DTXSID7022174 | 2104-64-5  | EPN                             | Organophosphorus Insecticides    | 20 - 65 years | 8.28E+04 | 2.92E+03 | 2.25E+08 |
| DTXSID4020458 | 2921-88-2  | Chlorpyrifos                    | Organophosphorus Insecticides    | 20 - 65 years | 4.55E+03 | 5.77E+02 | 2.36E+07 |
| DTXSID1020855 | 298-00-0   | Methyl parathion                | Organophosphorus Insecticides    | 20 - 65 years | 1.12E+06 | 4.13E+04 | 2.84E+09 |
| DTXSID9020407 | 333-41-5   | Diazinon                        | Organophosphorus Insecticides    | 20 - 65 years | 1.13E+06 | 1.03E+06 | 1.42E+06 |
| DTXSID8022292 | 52645-53-1 | Permethrin                      | Pyrethroids                      | 20 - 65 years | 1.68E+05 | 1.61E+05 | 8.59E+08 |
| DTXSID5035957 | 68359-37-5 | Cyfluthrin                      | Pyrethroids                      | 20 - 65 years | 2.83E+05 | 1.45E+05 | 1.49E+06 |
| DTXSID3020964 | 98-95-3    | Nitrobenzene                    | Organophosphorus Insecticides    | 20 - 65 years | 2.70E+06 | 9.94E+04 | 6.01E+09 |
| DTXSID4020791 | 121-75-5   | Malathion                       | Organophosphorus Insecticides    | 20 - 65 years | 7.15E+05 | 2.80E+04 | 3.34E+08 |
| DTXSID2022254 | 13071-79-9 | Terbufos                        | Organophosphorus Insecticides    | 20 - 65 years | 2.19E+06 | 6.19E+04 | 5.57E+08 |
| DTXSID3022455 | 131-11-3   | Dimethyl phthalate              | Phthalates                       | 20 - 65 years | 3.98E+04 | 3.48E+04 | 4.04E+04 |

| DTXSID        | CAS         | Chemical                 | ChemicalClass                     | Population         | BER      | lowCI    | upCI     |
|---------------|-------------|--------------------------|-----------------------------------|--------------------|----------|----------|----------|
| DTXSID9023914 | 141-66-2    | Dicrotophos              | Organophosphorus<br>Insecticides  | 20 - 65 years      | 4.52E+05 | 1.79E+04 | 2.40E+08 |
| DTXSID0024266 | 29232-93-7  | Pirimiphos-methyl        | Organophosphorus<br>Insecticides  | 20 - 65 years      | 2.70E+05 | 1.17E+04 | 1.75E+08 |
| DTXSID4032459 | 298-02-2    | Phorate                  | Organophosphorus<br>Insecticides  | 20 - 65 years      | 5.86E+04 | 1.90E+03 | 1.65E+07 |
| DTXSID7024328 | 3689-24-5   | Sulfotepp                | Organophosphorus<br>Insecticides  | 20 - 65 years      | 2.46E+05 | 1.51E+04 | 2.13E+08 |
| DTXSID0021389 | 52-68-6     | Trichlorfon              | Organophosphorus<br>Insecticides  | 20 - 65 years      | 4.69E+05 | 1.78E+04 | 3.55E+08 |
| DTXSID2032344 | 54593-83-8  | Chlorethoxyphos          | Organophosphorus<br>Insecticides  | 20 - 65 years      | 2.49E+05 | 1.61E+04 | 2.05E+08 |
| DTXSID2020347 | 56-72-4     | Coumaphos                | Organophosphorus<br>Insecticides  | 20 - 65 years      | 2.67E+04 | 2.09E+03 | 2.32E+07 |
| DTXSID2024086 | 563-12-2    | Ethion                   | Organophosphorus<br>Insecticides  | 20 - 65 years      | 2.32E+05 | 5.85E+03 | 5.28E+07 |
| DTXSID7020479 | 60-51-5     | Dimethoate               | Organophosphorus<br>Insecticides  | 20 - 65 years      | 6.42E+05 | 2.28E+04 | 3.01E+08 |
| DTXSID5020449 | 62-73-7     | Dichlorvos               | Organophosphorus<br>Insecticides  | 20 - 65 years      | 2.07E+05 | 8.51E+03 | 1.48E+08 |
| DTXSID5024261 | 732-11-6    | Phosmet                  | Organophosphorus<br>Insecticides  | 20 - 65 years      | 5.96E+05 | 2.02E+04 | 2.62E+08 |
| DTXSID3020122 | 86-50-0     | Azinphos methyl          | Organophosphorus<br>Insecticides  | 20 - 65 years      | 4.85E+05 | 1.94E+04 | 2.27E+08 |
| DTXSID5020819 | 950-37-8    | Methidathion             | Organophosphorus<br>Insecticides  | 20 - 65 years      | 5.55E+05 | 2.16E+04 | 2.30E+08 |
| DTXSID9022360 | 140-66-9    | 4-tert-Octylphenol       | Personal Care/Consumer<br>Product | 20 - 65 years      | 4.83E+04 | 2.31E+04 | 2.87E+05 |
| DTXSID5022308 | 446-72-0    | Genistein                | Phytoestrogens                    | 20 - 65 years      | 1.53E+03 | 1.33E+03 | 1.52E+03 |
| DTXSID9022310 | 486-66-8    | Daidzein                 | Phytoestrogens                    | 20 - 65 years      | 9.70E+02 | 8.23E+02 | 9.20E+02 |
| DTXSID2020686 | 58-89-9     | Lindane                  | Fungicides                        | 20 - 65 years      | 1.96E+05 | 6.21E+03 | 5.73E+07 |
| DTXSID7020687 | 608-73-1    | Hexachlorocyclohexane    | Fungicides                        | 20 - 65 years      | 2.19E+05 | 6.48E+03 | 5.89E+07 |
| DTXSID7021106 | 87-86-5     | Pentachlorophenol        | Fungicides                        | 20 - 65 years      | 4.39E+05 | 1.22E+04 | 1.84E+08 |
| DTXSID2021151 | 90-43-7     | ortho-Phenylphenol       | Fungicides                        | 20 - 65 years      | 3.11E+04 | 2.72E+04 | 3.44E+04 |
| DTXSID5021388 | 93-76-5     | 2,4,5-Trichlorophenoxyac | Herbicides                        | 20 - 65 years      | 6.01E+05 | 1.63E+05 | 3.54E+07 |
| DTXSID1032642 | 122931-48-0 | Rimsulfuron              | Sulfonyl Urea Herbicides          | 20 - 65 years      | 3.29E+08 | 1.83E+07 | 2.47E+11 |
| DTXSID4034364 | 144651-06-9 | Oxasulfuron              | Sulfonyl Urea Herbicides          | 20 - 65 years      | 4.34E+08 | 2.43E+07 | 3.59E+11 |
| DTXSID7034753 | 173159-57-4 | Foramsulfuron            | Sulfonyl Urea Herbicides          | 20 - 65 years      | 2.03E+08 | 1.13E+07 | 1.07E+11 |
| DTXSID9020112 | 1912-24-9   | Atrazine                 | Herbicides                        | 20 - 65 years      | 1.43E+06 | 1.83E+05 | 6.71E+07 |
| DTXSID8023846 | 30560-19-1  | Acephate                 | Organophosphorus<br>Insecticides  | 20 - 65 years      | 1.29E+06 | 3.87E+05 | 1.68E+07 |
| DTXSID6023864 | 74223-64-6  | Metsulfuron-methyl       | Sulfonyl Urea Herbicides          | 20 - 65 years      | 4.55E+07 | 1.01E+07 | 4.56E+09 |
| DTXSID7024164 | 83055-99-6  | Bensulfuron-methyl       | Sulfonyl Urea Herbicides          | 20 - 65 years      | 2.64E+08 | 1.44E+07 | 1.63E+11 |
| DTXSID9034573 | 97780-06-8  | Ethametsulfuron-methyl   | Sulfonyl Urea Herbicides          | 20 - 65 years      | 5.57E+07 | 3.36E+06 | 3.54E+10 |
| DTXSID7021948 | 114-26-1    | Propoxur                 | Carbamate Pesticides              | 20 - 65 years      | 1.72E+08 | 2.53E+06 | 3.16E+11 |
| DTXSID9020249 | 1563-66-2   | Carbofuran               | Carbamate Pesticides              | 20 - 65 years      | 1.85E+07 | 3.36E+05 | 3.56E+10 |
| DTXSID8023848 | 34256-82-1  | Acetochlor               | Unknown                           | 20 - 65 years      | 7.44E+06 | 2.07E+06 | 1.41E+08 |
| DTXSID4022448 | 51218-45-2  | Metolachlor              | Herbicides                        | 20 - 65 years      | 3.00E+06 | 9.40E+05 | 4.94E+07 |
| DTXSID1022265 | 15972-60-8  | Alachlor                 | Herbicides                        | 20 - 65 years      | 2.17E+06 | 1.43E+06 | 3.80E+06 |
| DTXSID2021284 | 100-42-5    | Styrene                  | Organophosphorus<br>Compounds     | 66 years and older | 1.59E+03 | 1.56E+02 | 2.11E+06 |
| DTXSID1020431 | 106-46-7    | para-Dichlorobenzene     | Personal Care/Consumer<br>Product | 66 years and older | 1.88E+04 | 1.17E+04 | 1.37E+04 |
| DTXSID3020203 | 106-99-0    | 1,3-Butadiene            | Organophosphorus<br>Compounds     | 66 years and older | 8.30E+02 | 6.95E+02 | 7.18E+02 |
| DTXSID5020029 | 107-13-1    | Acrylonitrile            | Organophosphorus<br>Compounds     | 66 years and older | 1.40E+05 | 6.72E+04 | 7.96E+04 |

| DTXSID        | CAS        | Chemical                        | ChemicalClass                    | Population         | BER      | lowCI    | upCI     |
|---------------|------------|---------------------------------|----------------------------------|--------------------|----------|----------|----------|
| DTXSID7021360 | 108-88-3   | Toulene                         | Volatile Organic Compounds       | 66 years and older | 1.79E+04 | 1.45E+04 | 1.54E+04 |
| DTXSID9022528 | 120-47-8   | Ethyl paraben                   | Personal Care/Consumer Product   | 66 years and older | 4.74E+04 | 5.87E+04 | 7.74E+04 |
| DTXSID2021319 | 127-18-4   | Tetrachloroethene               | Volatile Organic Compounds       | 66 years and older | 8.13E+04 | 1.04E+04 | 2.27E+07 |
| DTXSID3024289 | 129-00-0   | Pyrene                          | Polycyclic Aromatic Hydrocarbons | 66 years and older | 3.14E+04 | 1.32E+04 | 1.43E+04 |
| DTXSID3022405 | 131-57-7   | Benzophenone-3                  | Personal Care/Consumer Product   | 66 years and older | 4.41E+03 | 2.87E+03 | 3.39E+03 |
| DTXSID5032498 | 3380-34-5  | Triclosan                       | Personal Care/Consumer Product   | 66 years and older | 8.02E+03 | 7.08E+03 | 8.61E+03 |
| DTXSID9020247 | 63-25-2    | Carbaryl                        | Polycyclic Aromatic Hydrocarbons | 66 years and older | 2.35E+04 | 1.44E+04 | 2.30E+07 |
| DTXSID3039242 | 71-43-2    | Benzene                         | Volatile Organic Compounds       | 66 years and older | 3.05E+05 | 2.14E+05 | 2.34E+05 |
| DTXSID0021383 | 79-01-6    | Trichloroethene                 | Volatile Organic Compounds       | 66 years and older | 7.93E+05 | 6.61E+04 | 4.23E+08 |
| DTXSID7020182 | 80-05-7    | Bisphenol A                     | Personal Care/Consumer Product   | 66 years and older | 3.54E+04 | 2.25E+04 | 2.41E+04 |
| DTXSID3022409 | 80-09-1    | Bisphenol S                     | Personal Care/Consumer Product   | 66 years and older | 1.73E+05 | 1.07E+05 | 1.18E+05 |
| DTXSID7021780 | 84-66-2    | Diethyl phthalate               | Phthalates                       | 66 years and older | 1.81E+03 | 1.63E+03 | 1.79E+03 |
| DTXSID9022522 | 84-69-5    | Di-isobutyl phthalate           | Phthalates                       | 66 years and older | 1.32E+04 | 8.40E+03 | 8.92E+03 |
| DTXSID2021781 | 84-74-2    | Dibutyl phthalate               | Phthalates                       | 66 years and older | 7.18E+03 | 1.76E+03 | 1.30E+07 |
| DTXSID8024105 | 86-73-7    | Fluorene                        | Polycyclic Aromatic Hydrocarbons | 66 years and older | 7.66E+04 | 4.36E+04 | 4.60E+04 |
| DTXSID8020913 | 91-20-3    | Naphthalene                     | Polycyclic Aromatic Hydrocarbons | 66 years and older | 2.95E+04 | 2.45E+03 | 6.53E+07 |
| DTXSID4022527 | 94-13-3    | n-propyl paraben                | Personal Care/Consumer Product   | 66 years and older | 1.13E+04 | 1.09E+04 | 1.27E+04 |
| DTXSID3020209 | 94-26-8    | Butyl paraben                   | Personal Care/Consumer Product   | 66 years and older | 6.26E+05 | 4.42E+05 | 1.70E+06 |
| DTXSID0020442 | 94-75-7    | 2,4-Dichlorophenoxyacetic acid  | Personal Care/Consumer Product   | 66 years and older | 4.11E+04 | 3.30E+03 | 8.93E+06 |
| DTXSID4022529 | 99-76-3    | Methyl paraben                  | Personal Care/Consumer Product   | 66 years and older | 2.54E+03 | 2.28E+03 | 2.63E+03 |
| DTXSID5021411 | 115-96-8   | Tris(2-chloroethyl) phosphite   | Flame Retardant                  | 66 years and older | 4.34E+05 | 2.92E+05 | 3.21E+05 |
| DTXSID3021986 | 126-73-8   | Tri-n-butyl phosphate (TBP)     | Flame Retardant                  | 66 years and older | 2.09E+03 | 1.89E+03 | 2.04E+03 |
| DTXSID2021995 | 134-62-3   | N,N-Diethyl-3-methylbenzylamine | Insect Repellent                 | 66 years and older | 1.65E+06 | 9.34E+05 | 8.33E+06 |
| DTXSID7022174 | 2104-64-5  | EPN                             | Organophosphorus Insecticides    | 66 years and older | 9.72E+04 | 2.92E+03 | 2.25E+08 |
| DTXSID4020458 | 2921-88-2  | Chlorpyrifos                    | Organophosphorus Insecticides    | 66 years and older | 4.76E+03 | 5.77E+02 | 2.36E+07 |
| DTXSID1020855 | 298-00-0   | Methyl parathion                | Organophosphorus Insecticides    | 66 years and older | 1.19E+06 | 4.13E+04 | 2.84E+09 |
| DTXSID9020407 | 333-41-5   | Diazinon                        | Organophosphorus Insecticides    | 66 years and older | 4.27E+05 | 1.03E+06 | 1.42E+06 |
| DTXSID8022292 | 52645-53-1 | Permethrin                      | Pyrethroids                      | 66 years and older | 1.60E+05 | 1.61E+05 | 8.59E+08 |
| DTXSID5035957 | 68359-37-5 | Cyfluthrin                      | Pyrethroids                      | 66 years and older | 2.32E+05 | 1.45E+05 | 1.49E+06 |
| DTXSID3020964 | 98-95-3    | Nitrobenzene                    | Organophosphorus Insecticides    | 66 years and older | 3.00E+06 | 9.94E+04 | 6.01E+09 |
| DTXSID4020791 | 121-75-5   | Malathion                       | Organophosphorus Insecticides    | 66 years and older | 7.25E+05 | 2.80E+04 | 3.34E+08 |
| DTXSID2022254 | 13071-79-9 | Terbufos                        | Organophosphorus Insecticides    | 66 years and older | 2.47E+06 | 6.19E+04 | 5.57E+08 |
| DTXSID3022455 | 131-11-3   | Dimethyl phthalate              | Phthalates                       | 66 years and older | 6.84E+04 | 3.48E+04 | 4.04E+04 |

| DTXSID        | CAS         | Chemical                          | ChemicalClass                     | Population         | BER      | lowCI    | upCI     |
|---------------|-------------|-----------------------------------|-----------------------------------|--------------------|----------|----------|----------|
| DTXSID9023914 | 141-66-2    | Dicrotophos                       | Organophosphorus<br>Insecticides  | 66 years and older | 4.78E+05 | 1.79E+04 | 2.40E+08 |
| DTXSID0024266 | 29232-93-7  | Pirimiphos-methyl                 | Organophosphorus<br>Insecticides  | 66 years and older | 2.32E+05 | 1.17E+04 | 1.75E+08 |
| DTXSID4032459 | 298-02-2    | Phorate                           | Organophosphorus<br>Insecticides  | 66 years and older | 6.77E+04 | 1.90E+03 | 1.65E+07 |
| DTXSID7024328 | 3689-24-5   | Sulfotepp                         | Organophosphorus<br>Insecticides  | 66 years and older | 2.79E+05 | 1.51E+04 | 2.13E+08 |
| DTXSID0021389 | 52-68-6     | Trichlorfon                       | Organophosphorus<br>Insecticides  | 66 years and older | 5.10E+05 | 1.78E+04 | 3.55E+08 |
| DTXSID2032344 | 54593-83-8  | Chlorethoxyphos                   | Organophosphorus<br>Insecticides  | 66 years and older | 2.85E+05 | 1.61E+04 | 2.05E+08 |
| DTXSID2020347 | 56-72-4     | Coumaphos                         | Organophosphorus<br>Insecticides  | 66 years and older | 3.61E+04 | 2.09E+03 | 2.32E+07 |
| DTXSID2024086 | 563-12-2    | Ethion                            | Organophosphorus<br>Insecticides  | 66 years and older | 2.56E+05 | 5.85E+03 | 5.28E+07 |
| DTXSID7020479 | 60-51-5     | Dimethoate                        | Organophosphorus<br>Insecticides  | 66 years and older | 6.73E+05 | 2.28E+04 | 3.01E+08 |
| DTXSID5020449 | 62-73-7     | Dichlorvos                        | Organophosphorus<br>Insecticides  | 66 years and older | 2.31E+05 | 8.51E+03 | 1.48E+08 |
| DTXSID5024261 | 732-11-6    | Phosmet                           | Organophosphorus<br>Insecticides  | 66 years and older | 4.91E+05 | 2.02E+04 | 2.62E+08 |
| DTXSID3020122 | 86-50-0     | Azinphos methyl                   | Organophosphorus<br>Insecticides  | 66 years and older | 4.74E+05 | 1.94E+04 | 2.27E+08 |
| DTXSID5020819 | 950-37-8    | Methidathion                      | Organophosphorus<br>Insecticides  | 66 years and older | 5.42E+05 | 2.16E+04 | 2.30E+08 |
| DTXSID9022360 | 140-66-9    | 4-tert-Octylphenol                | Personal Care/Consumer<br>Product | 66 years and older | 4.71E+04 | 2.31E+04 | 2.87E+05 |
| DTXSID5022308 | 446-72-0    | Genistein                         | Phytoestrogens                    | 66 years and older | 1.87E+03 | 1.33E+03 | 1.52E+03 |
| DTXSID9022310 | 486-66-8    | Daidzein                          | Phytoestrogens                    | 66 years and older | 1.20E+03 | 8.23E+02 | 9.20E+02 |
| DTXSID2020686 | 58-89-9     | Lindane                           | Fungicides                        | 66 years and older | 1.23E+05 | 6.21E+03 | 5.73E+07 |
| DTXSID7020687 | 608-73-1    | Hexachlorocyclohexane             | Fungicides                        | 66 years and older | 1.50E+05 | 6.48E+03 | 5.89E+07 |
| DTXSID7021106 | 87-86-5     | Pentachlorophenol                 | Fungicides                        | 66 years and older | 2.60E+05 | 1.22E+04 | 1.84E+08 |
| DTXSID2021151 | 90-43-7     | ortho-Phenylphenol                | Fungicides                        | 66 years and older | 2.54E+04 | 2.72E+04 | 3.44E+04 |
| DTXSID5021388 | 93-76-5     | 2,4,5-Trichlorophenoxyacetic acid | Herbicides                        | 66 years and older | 2.65E+06 | 1.63E+05 | 3.54E+07 |
| DTXSID1032642 | 122931-48-0 | Rimsulfuron                       | Sulfonyl Urea Herbicides          | 66 years and older | 2.84E+08 | 1.83E+07 | 2.47E+11 |
| DTXSID4034364 | 144651-06-9 | Oxasulfuron                       | Sulfonyl Urea Herbicides          | 66 years and older | 3.31E+08 | 2.43E+07 | 3.59E+11 |
| DTXSID7034753 | 173159-57-4 | Foramsulfuron                     | Sulfonyl Urea Herbicides          | 66 years and older | 1.62E+08 | 1.13E+07 | 1.07E+11 |
| DTXSID9020112 | 1912-24-9   | Atrazine                          | Herbicides                        | 66 years and older | 1.34E+07 | 1.83E+05 | 6.71E+07 |
| DTXSID8023846 | 30560-19-1  | Acephate                          | Organophosphorus<br>Insecticides  | 66 years and older | 9.01E+05 | 3.87E+05 | 1.68E+07 |
| DTXSID6023864 | 74223-64-6  | Metsulfuron-methyl                | Sulfonyl Urea Herbicides          | 66 years and older | 3.03E+08 | 1.01E+07 | 4.56E+09 |
| DTXSID7024164 | 83055-99-6  | Bensulfuron-methyl                | Sulfonyl Urea Herbicides          | 66 years and older | 1.87E+08 | 1.44E+07 | 1.63E+11 |
| DTXSID9034573 | 97780-06-8  | Ethametsulfuron-methyl            | Sulfonyl Urea Herbicides          | 66 years and older | 4.83E+07 | 3.36E+06 | 3.54E+10 |
| DTXSID7021948 | 114-26-1    | Propoxur                          | Carbamate Pesticides              | 66 years and older | 7.36E+07 | 2.53E+06 | 3.16E+11 |
| DTXSID9020249 | 1563-66-2   | Carbofuran                        | Carbamate Pesticides              | 66 years and older | 1.14E+07 | 3.36E+05 | 3.56E+10 |
| DTXSID8023848 | 34256-82-1  | Acetochlor                        | Unknown                           | 66 years and older | 7.94E+06 | 2.07E+06 | 1.41E+08 |
| DTXSID4022448 | 51218-45-2  | Metolachlor                       | Herbicides                        | 66 years and older | 3.24E+06 | 9.40E+05 | 4.94E+07 |
| DTXSID1022265 | 15972-60-8  | Alachlor                          | Herbicides                        | 66 years and older |          | 1.43E+06 | 3.80E+06 |
| DTXSID2021284 | 100-42-5    | Styrene                           | Volatile Organic<br>Compounds     | ReproAgeFemale     | 7.42E+02 | 1.56E+02 | 2.11E+06 |
| DTXSID1020431 | 106-46-7    | para-Dichlorobenzene              | Personal Care/Consumer<br>Product | ReproAgeFemale     | 1.21E+04 | 1.17E+04 | 1.37E+04 |
| DTXSID3020203 | 106-99-0    | 1,3-Butadiene                     | Volatile Organic<br>Compounds     | ReproAgeFemale     | 7.99E+02 | 6.95E+02 | 7.18E+02 |
| DTXSID5020029 | 107-13-1    | Acrylonitrile                     | Volatile Organic<br>Compounds     | ReproAgeFemale     | 7.10E+04 | 6.72E+04 | 7.96E+04 |

| DTXSID        | CAS        | Chemical                        | ChemicalClass                    | Population     | BER      | lowCI    | upCI     |
|---------------|------------|---------------------------------|----------------------------------|----------------|----------|----------|----------|
| DTXSID7021360 | 108-88-3   | Toulene                         | Volatile Organic Compounds       | ReproAgeFemale | 1.56E+04 | 1.45E+04 | 1.54E+04 |
| DTXSID9022528 | 120-47-8   | Ethyl paraben                   | Personal Care/Consumer Product   | ReproAgeFemale | 2.65E+04 | 5.87E+04 | 7.74E+04 |
| DTXSID2021319 | 127-18-4   | Tetrachloroethene               | Volatile Organic Compounds       | ReproAgeFemale | 8.94E+04 | 1.04E+04 | 2.27E+07 |
| DTXSID3024289 | 129-00-0   | Pyrene                          | Polycyclic Aromatic Hydrocarbons | ReproAgeFemale | 1.19E+04 | 1.32E+04 | 1.43E+04 |
| DTXSID3022405 | 131-57-7   | Benzophenone-3                  | Personal Care/Consumer Product   | ReproAgeFemale | 1.99E+03 | 2.87E+03 | 3.39E+03 |
| DTXSID5032498 | 3380-34-5  | Triclosan                       | Personal Care/Consumer Product   | ReproAgeFemale | 7.49E+03 | 7.08E+03 | 8.61E+03 |
| DTXSID9020247 | 63-25-2    | Carbaryl                        | Polycyclic Aromatic Hydrocarbons | ReproAgeFemale | 2.43E+04 | 1.44E+04 | 2.30E+07 |
| DTXSID3039242 | 71-43-2    | Benzene                         | Volatile Organic Compounds       | ReproAgeFemale | 2.22E+05 | 2.14E+05 | 2.34E+05 |
| DTXSID0021383 | 79-01-6    | Trichloroethene                 | Volatile Organic Compounds       | ReproAgeFemale | 8.39E+05 | 6.61E+04 | 4.23E+08 |
| DTXSID7020182 | 80-05-7    | Bisphenol A                     | Personal Care/Consumer Product   | ReproAgeFemale | 2.47E+04 | 2.25E+04 | 2.41E+04 |
| DTXSID3022409 | 80-09-1    | Bisphenol S                     | Personal Care/Consumer Product   | ReproAgeFemale | 1.10E+05 | 1.07E+05 | 1.18E+05 |
| DTXSID7021780 | 84-66-2    | Diethyl phthalate               | Phthalates                       | ReproAgeFemale | 1.57E+03 | 1.63E+03 | 1.79E+03 |
| DTXSID9022522 | 84-69-5    | Di-isobutyl phthalate           | Phthalates                       | ReproAgeFemale | 8.68E+03 | 8.40E+03 | 8.92E+03 |
| DTXSID2021781 | 84-74-2    | Dibutyl phthalate               | Phthalates                       | ReproAgeFemale | 8.65E+03 | 1.76E+03 | 1.30E+07 |
| DTXSID8024105 | 86-73-7    | Fluorene                        | Polycyclic Aromatic Hydrocarbons | ReproAgeFemale | 4.31E+04 | 4.36E+04 | 4.60E+04 |
| DTXSID8020913 | 91-20-3    | Naphthalene                     | Polycyclic Aromatic Hydrocarbons | ReproAgeFemale | 3.46E+04 | 2.45E+03 | 6.53E+07 |
| DTXSID4022527 | 94-13-3    | n-propyl paraben                | Personal Care/Consumer Product   | ReproAgeFemale | 5.25E+03 | 1.09E+04 | 1.27E+04 |
| DTXSID3020209 | 94-26-8    | Butyl paraben                   | Personal Care/Consumer Product   | ReproAgeFemale | 4.05E+05 | 4.42E+05 | 1.70E+06 |
| DTXSID0020442 | 94-75-7    | 2,4-Dichlorophenoxyacetic acid  | Personal Care/Consumer Product   | ReproAgeFemale | 3.60E+04 | 3.30E+03 | 8.93E+06 |
| DTXSID4022529 | 99-76-3    | Methyl paraben                  | Personal Care/Consumer Product   | ReproAgeFemale | 1.42E+03 | 2.28E+03 | 2.63E+03 |
| DTXSID5021411 | 115-96-8   | Tris(2-chloroethyl) phosphite   | Flame Retardant                  | ReproAgeFemale | 3.24E+05 | 2.92E+05 | 3.21E+05 |
| DTXSID3021986 | 126-73-8   | Tri-n-butyl phosphate (TBP)     | Flame Retardant                  | ReproAgeFemale | 2.09E+03 | 1.89E+03 | 2.04E+03 |
| DTXSID2021995 | 134-62-3   | N,N-Diethyl-3-methylbenzylamine | Insect Repellent                 | ReproAgeFemale | 1.78E+06 | 9.34E+05 | 8.33E+06 |
| DTXSID7022174 | 2104-64-5  | EPN                             | Organophosphorus Insecticides    | ReproAgeFemale | 8.06E+04 | 2.92E+03 | 2.25E+08 |
| DTXSID4020458 | 2921-88-2  | Chlorpyrifos                    | Organophosphorus Insecticides    | ReproAgeFemale | 4.66E+03 | 5.77E+02 | 2.36E+07 |
| DTXSID1020855 | 298-00-0   | Methyl parathion                | Organophosphorus Insecticides    | ReproAgeFemale | 1.29E+06 | 4.13E+04 | 2.84E+09 |
| DTXSID9020407 | 333-41-5   | Diazinon                        | Organophosphorus Insecticides    | ReproAgeFemale | 1.13E+06 | 1.03E+06 | 1.42E+06 |
| DTXSID8022292 | 52645-53-1 | Permethrin                      | Pyrethroids                      | ReproAgeFemale | 3.29E+05 | 1.61E+05 | 8.59E+08 |
| DTXSID5035957 | 68359-37-5 | Cyfluthrin                      | Pyrethroids                      | ReproAgeFemale | 2.96E+05 | 1.45E+05 | 1.49E+06 |
| DTXSID3020964 | 98-95-3    | Nitrobenzene                    | Organophosphorus Insecticides    | ReproAgeFemale | 2.51E+06 | 9.94E+04 | 6.01E+09 |
| DTXSID4020791 | 121-75-5   | Malathion                       | Organophosphorus Insecticides    | ReproAgeFemale | 8.34E+05 | 2.80E+04 | 3.34E+08 |
| DTXSID2022254 | 13071-79-9 | Terbufos                        | Organophosphorus Insecticides    | ReproAgeFemale | 2.02E+06 | 6.19E+04 | 5.57E+08 |
| DTXSID3022455 | 131-11-3   | Dimethyl phthalate              | Phthalates                       | ReproAgeFemale | 3.85E+04 | 3.48E+04 | 4.04E+04 |

| DTXSID        | CAS         | Chemical                 | ChemicalClass                     | Population     | BER      | lowCI    | upCI     |
|---------------|-------------|--------------------------|-----------------------------------|----------------|----------|----------|----------|
| DTXSID9023914 | 141-66-2    | Dicrotophos              | Organophosphorus<br>Insecticides  | ReproAgeFemale | 4.38E+05 | 1.79E+04 | 2.40E+08 |
| DTXSID0024266 | 29232-93-7  | Pirimiphos-methyl        | Organophosphorus<br>Insecticides  | ReproAgeFemale | 3.00E+05 | 1.17E+04 | 1.75E+08 |
| DTXSID4032459 | 298-02-2    | Phorate                  | Organophosphorus<br>Insecticides  | ReproAgeFemale | 5.81E+04 | 1.90E+03 | 1.65E+07 |
| DTXSID7024328 | 3689-24-5   | Sulfotepp                | Organophosphorus<br>Insecticides  | ReproAgeFemale | 2.58E+05 | 1.51E+04 | 2.13E+08 |
| DTXSID0021389 | 52-68-6     | Trichlorfon              | Organophosphorus<br>Insecticides  | ReproAgeFemale | 4.98E+05 | 1.78E+04 | 3.55E+08 |
| DTXSID2032344 | 54593-83-8  | Chlorethoxyphos          | Organophosphorus<br>Insecticides  | ReproAgeFemale | 2.51E+05 | 1.61E+04 | 2.05E+08 |
| DTXSID2020347 | 56-72-4     | Coumaphos                | Organophosphorus<br>Insecticides  | ReproAgeFemale | 3.24E+04 | 2.09E+03 | 2.32E+07 |
| DTXSID2024086 | 563-12-2    | Ethion                   | Organophosphorus<br>Insecticides  | ReproAgeFemale | 2.45E+05 | 5.85E+03 | 5.28E+07 |
| DTXSID7020479 | 60-51-5     | Dimethoate               | Organophosphorus<br>Insecticides  | ReproAgeFemale | 6.34E+05 | 2.28E+04 | 3.01E+08 |
| DTXSID5020449 | 62-73-7     | Dichlorvos               | Organophosphorus<br>Insecticides  | ReproAgeFemale | 2.33E+05 | 8.51E+03 | 1.48E+08 |
| DTXSID5024261 | 732-11-6    | Phosmet                  | Organophosphorus<br>Insecticides  | ReproAgeFemale | 5.75E+05 | 2.02E+04 | 2.62E+08 |
| DTXSID3020122 | 86-50-0     | Azinphos methyl          | Organophosphorus<br>Insecticides  | ReproAgeFemale | 4.94E+05 | 1.94E+04 | 2.27E+08 |
| DTXSID5020819 | 950-37-8    | Methidathion             | Organophosphorus<br>Insecticides  | ReproAgeFemale | 6.07E+05 | 2.16E+04 | 2.30E+08 |
| DTXSID9022360 | 140-66-9    | 4-tert-Octylphenol       | Personal Care/Consumer<br>Product | ReproAgeFemale | 4.64E+04 | 2.31E+04 | 2.87E+05 |
| DTXSID5022308 | 446-72-0    | Genistein                | Phytoestrogens                    | ReproAgeFemale | 1.59E+03 | 1.33E+03 | 1.52E+03 |
| DTXSID9022310 | 486-66-8    | Daidzein                 | Phytoestrogens                    | ReproAgeFemale | 9.36E+02 | 8.23E+02 | 9.20E+02 |
| DTXSID2020686 | 58-89-9     | Lindane                  | Fungicides                        | ReproAgeFemale | 1.83E+05 | 6.21E+03 | 5.73E+07 |
| DTXSID2020687 | 608-73-1    | Hexachlorocyclohexane    | Fungicides                        | ReproAgeFemale | 2.25E+05 | 6.48E+03 | 5.89E+07 |
| DTXSID7021106 | 87-86-5     | Pentachlorophenol        | Fungicides                        | ReproAgeFemale | 3.84E+05 | 1.22E+04 | 1.84E+08 |
| DTXSID2021151 | 90-43-7     | ortho-Phenylphenol       | Fungicides                        | ReproAgeFemale | 3.01E+04 | 2.72E+04 | 3.44E+04 |
| DTXSID5021388 | 93-76-5     | 2,4,5-Trichlorophenoxyac | Herbicides                        | ReproAgeFemale | 4.81E+05 | 1.63E+05 | 3.54E+07 |
| DTXSID1032642 | 122931-48-0 | Rimsulfuron              | Sulfonyl Urea Herbicides          | ReproAgeFemale | 2.78E+08 | 1.83E+07 | 2.47E+11 |
| DTXSID4034364 | 144651-06-9 | Oxasulfuron              | Sulfonyl Urea Herbicides          | ReproAgeFemale | 3.49E+08 | 2.43E+07 | 3.59E+11 |
| DTXSID7034753 | 173159-57-4 | Foramsulfuron            | Sulfonyl Urea Herbicides          | ReproAgeFemale | 1.71E+08 | 1.13E+07 | 1.07E+11 |
| DTXSID9020112 | 1912-24-9   | Atrazine                 | Herbicides                        | ReproAgeFemale | 1.28E+06 | 1.83E+05 | 6.71E+07 |
| DTXSID8023846 | 30560-19-1  | Acephate                 | Organophosphorus<br>Insecticides  | ReproAgeFemale | 1.34E+06 | 3.87E+05 | 1.68E+07 |
| DTXSID6023864 | 74223-64-6  | Metsulfuron-methyl       | Sulfonyl Urea Herbicides          | ReproAgeFemale | 2.78E+08 | 1.01E+07 | 4.56E+09 |
| DTXSID7024164 | 83055-99-6  | Bensulfuron-methyl       | Sulfonyl Urea Herbicides          | ReproAgeFemale | 2.09E+08 | 1.44E+07 | 1.63E+11 |
| DTXSID9034573 | 97780-06-8  | Ethametsulfuron-methyl   | Sulfonyl Urea Herbicides          | ReproAgeFemale | 4.87E+07 | 3.36E+06 | 3.54E+10 |
| DTXSID7021948 | 114-26-1    | Propoxur                 | Carbamate Pesticides              | ReproAgeFemale | 1.41E+08 | 2.53E+06 | 3.16E+11 |
| DTXSID9020249 | 1563-66-2   | Carbofuran               | Carbamate Pesticides              | ReproAgeFemale | 1.62E+07 | 3.36E+05 | 3.56E+10 |
| DTXSID8023848 | 34256-82-1  | Acetochlor               | Unknown                           | ReproAgeFemale | 7.10E+06 | 2.07E+06 | 1.41E+08 |
| DTXSID4022448 | 51218-45-2  | Metolachlor              | Herbicides                        | ReproAgeFemale | 3.94E+06 | 9.40E+05 | 4.94E+07 |
| DTXSID1022265 | 15972-60-8  | Alachlor                 | Herbicides                        | ReproAgeFemale | 2.29E+06 | 1.43E+06 | 3.80E+06 |
| DTXSID2021284 | 100-42-5    | Styrene                  | Volatile Organic<br>Compounds     | BMI <= 30      | 7.46E+02 | 1.56E+02 | 2.11E+06 |
| DTXSID1020431 | 106-46-7    | para-Dichlorobenzene     | Personal Care/Consumer<br>Product | BMI <= 30      | 1.23E+04 | 1.17E+04 | 1.37E+04 |
| DTXSID3020203 | 106-99-0    | 1,3-Butadiene            | Volatile Organic<br>Compounds     | BMI <= 30      | 6.44E+02 | 6.95E+02 | 7.18E+02 |
| DTXSID5020029 | 107-13-1    | Acrylonitrile            | Volatile Organic<br>Compounds     | BMI <= 30      | 7.32E+04 | 6.72E+04 | 7.96E+04 |

| DTXSID        | CAS        | Chemical                        | ChemicalClass                    | Population | BER      | lowCI    | upCI     |
|---------------|------------|---------------------------------|----------------------------------|------------|----------|----------|----------|
| DTXSID7021360 | 108-88-3   | Toulene                         | Volatile Organic Compounds       | BMI <= 30  | 1.35E+04 | 1.45E+04 | 1.54E+04 |
| DTXSID9022528 | 120-47-8   | Ethyl paraben                   | Personal Care/Consumer Product   | BMI <= 30  | 4.98E+04 | 5.87E+04 | 7.74E+04 |
| DTXSID2021319 | 127-18-4   | Tetrachloroethene               | Volatile Organic Compounds       | BMI <= 30  | 1.22E+05 | 1.04E+04 | 2.27E+07 |
| DTXSID3024289 | 129-00-0   | Pyrene                          | Polycyclic Aromatic Hydrocarbons | BMI <= 30  | 1.24E+04 | 1.32E+04 | 1.43E+04 |
| DTXSID3022405 | 131-57-7   | Benzophenone-3                  | Personal Care/Consumer Product   | BMI <= 30  | 2.71E+03 | 2.87E+03 | 3.39E+03 |
| DTXSID5032498 | 3380-34-5  | Triclosan                       | Personal Care/Consumer Product   | BMI <= 30  | 7.04E+03 | 7.08E+03 | 8.61E+03 |
| DTXSID9020247 | 63-25-2    | Carbaryl                        | Polycyclic Aromatic Hydrocarbons | BMI <= 30  | 2.15E+04 | 1.44E+04 | 2.30E+07 |
| DTXSID3039242 | 71-43-2    | Benzene                         | Volatile Organic Compounds       | BMI <= 30  | 1.95E+05 | 2.14E+05 | 2.34E+05 |
| DTXSID0021383 | 79-01-6    | Trichloroethene                 | Volatile Organic Compounds       | BMI <= 30  | 1.10E+06 | 6.61E+04 | 4.23E+08 |
| DTXSID7020182 | 80-05-7    | Bisphenol A                     | Personal Care/Consumer Product   | BMI <= 30  | 2.20E+04 | 2.25E+04 | 2.41E+04 |
| DTXSID3022409 | 80-09-1    | Bisphenol S                     | Personal Care/Consumer Product   | BMI <= 30  | 1.11E+05 | 1.07E+05 | 1.18E+05 |
| DTXSID7021780 | 84-66-2    | Diethyl phthalate               | Phthalates                       | BMI <= 30  | 1.63E+03 | 1.63E+03 | 1.79E+03 |
| DTXSID9022522 | 84-69-5    | Di-isobutyl phthalate           | Phthalates                       | BMI <= 30  | 7.90E+03 | 8.40E+03 | 8.92E+03 |
| DTXSID2021781 | 84-74-2    | Dibutyl phthalate               | Phthalates                       | BMI <= 30  | 8.04E+03 | 1.76E+03 | 1.30E+07 |
| DTXSID8024105 | 86-73-7    | Fluorene                        | Polycyclic Aromatic Hydrocarbons | BMI <= 30  | 4.17E+04 | 4.36E+04 | 4.60E+04 |
| DTXSID8020913 | 91-20-3    | Naphthalene                     | Polycyclic Aromatic Hydrocarbons | BMI <= 30  | 2.81E+04 | 2.45E+03 | 6.53E+07 |
| DTXSID4022527 | 94-13-3    | n-propyl paraben                | Personal Care/Consumer Product   | BMI <= 30  | 1.08E+04 | 1.09E+04 | 1.27E+04 |
| DTXSID3020209 | 94-26-8    | Butyl paraben                   | Personal Care/Consumer Product   | BMI <= 30  | 6.17E+05 | 4.42E+05 | 1.70E+06 |
| DTXSID0020442 | 94-75-7    | 2,4-Dichlorophenoxyacetic acid  | Personal Care/Consumer Product   | BMI <= 30  | 3.62E+04 | 3.30E+03 | 8.93E+06 |
| DTXSID4022529 | 99-76-3    | Methyl paraben                  | Personal Care/Consumer Product   | BMI <= 30  | 2.23E+03 | 2.28E+03 | 2.63E+03 |
| DTXSID5021411 | 115-96-8   | Tris(2-chloroethyl) phosphite   | Flame Retardant                  | BMI <= 30  | 2.78E+05 | 2.92E+05 | 3.21E+05 |
| DTXSID3021986 | 126-73-8   | Tri-n-butyl phosphate (TBP)     | Flame Retardant                  | BMI <= 30  | 1.72E+03 | 1.89E+03 | 2.04E+03 |
| DTXSID2021995 | 134-62-3   | N,N-Diethyl-3-methylbenzylamine | Insect Repellent                 | BMI <= 30  | 1.60E+06 | 9.34E+05 | 8.33E+06 |
| DTXSID7022174 | 2104-64-5  | EPN                             | Organophosphorus Insecticides    | BMI <= 30  | 8.30E+04 | 2.92E+03 | 2.25E+08 |
| DTXSID4020458 | 2921-88-2  | Chlorpyrifos                    | Organophosphorus Insecticides    | BMI <= 30  | 3.27E+03 | 5.77E+02 | 2.36E+07 |
| DTXSID1020855 | 298-00-0   | Methyl parathion                | Organophosphorus Insecticides    | BMI <= 30  | 1.02E+06 | 4.13E+04 | 2.84E+09 |
| DTXSID9020407 | 333-41-5   | Diazinon                        | Organophosphorus Insecticides    | BMI <= 30  | 1.04E+06 | 1.03E+06 | 1.42E+06 |
| DTXSID8022292 | 52645-53-1 | Permethrin                      | Pyrethroids                      | BMI <= 30  | 3.30E+05 | 1.61E+05 | 8.59E+08 |
| DTXSID5035957 | 68359-37-5 | Cyfluthrin                      | Pyrethroids                      | BMI <= 30  | 2.71E+05 | 1.45E+05 | 1.49E+06 |
| DTXSID3020964 | 98-95-3    | Nitrobenzene                    | Organophosphorus Insecticides    | BMI <= 30  | 2.80E+06 | 9.94E+04 | 6.01E+09 |
| DTXSID4020791 | 121-75-5   | Malathion                       | Organophosphorus Insecticides    | BMI <= 30  | 6.04E+05 | 2.80E+04 | 3.34E+08 |
| DTXSID2022254 | 13071-79-9 | Terbufos                        | Organophosphorus Insecticides    | BMI <= 30  | 2.20E+06 | 6.19E+04 | 5.57E+08 |
| DTXSID3022455 | 131-11-3   | Dimethyl phthalate              | Phthalates                       | BMI <= 30  | 3.34E+04 | 3.48E+04 | 4.04E+04 |



| DTXSID        | CAS         | Chemical                          | ChemicalClass                     | Population | BER      | lowCI    | upCI     |
|---------------|-------------|-----------------------------------|-----------------------------------|------------|----------|----------|----------|
| DTXSID9023914 | 141-66-2    | Dicrotophos                       | Organophosphorus<br>Insecticides  | BMI <= 30  | 3.51E+05 | 1.79E+04 | 2.40E+08 |
| DTXSID0024266 | 29232-93-7  | Pirimiphos-methyl                 | Organophosphorus<br>Insecticides  | BMI <= 30  | 2.05E+05 | 1.17E+04 | 1.75E+08 |
| DTXSID4032459 | 298-02-2    | Phorate                           | Organophosphorus<br>Insecticides  | BMI <= 30  | 5.88E+04 | 1.90E+03 | 1.65E+07 |
| DTXSID7024328 | 3689-24-5   | Sulfotepp                         | Organophosphorus<br>Insecticides  | BMI <= 30  | 1.94E+05 | 1.51E+04 | 2.13E+08 |
| DTXSID0021389 | 52-68-6     | Trichlorfon                       | Organophosphorus<br>Insecticides  | BMI <= 30  | 3.65E+05 | 1.78E+04 | 3.55E+08 |
| DTXSID2032344 | 54593-83-8  | Chlorethoxyphos                   | Organophosphorus<br>Insecticides  | BMI <= 30  | 1.97E+05 | 1.61E+04 | 2.05E+08 |
| DTXSID2020347 | 56-72-4     | Coumaphos                         | Organophosphorus<br>Insecticides  | BMI <= 30  | 2.75E+04 | 2.09E+03 | 2.32E+07 |
| DTXSID2024086 | 563-12-2    | Ethion                            | Organophosphorus<br>Insecticides  | BMI <= 30  | 2.14E+05 | 5.85E+03 | 5.28E+07 |
| DTXSID7020479 | 60-51-5     | Dimethoate                        | Organophosphorus<br>Insecticides  | BMI <= 30  | 5.09E+05 | 2.28E+04 | 3.01E+08 |
| DTXSID5020449 | 62-73-7     | Dichlorvos                        | Organophosphorus<br>Insecticides  | BMI <= 30  | 1.84E+05 | 8.51E+03 | 1.48E+08 |
| DTXSID5024261 | 732-11-6    | Phosmet                           | Organophosphorus<br>Insecticides  | BMI <= 30  | 4.52E+05 | 2.02E+04 | 2.62E+08 |
| DTXSID3020122 | 86-50-0     | Azinphos methyl                   | Organophosphorus<br>Insecticides  | BMI <= 30  | 3.91E+05 | 1.94E+04 | 2.27E+08 |
| DTXSID5020819 | 950-37-8    | Methidathion                      | Organophosphorus<br>Insecticides  | BMI <= 30  | 4.59E+05 | 2.16E+04 | 2.30E+08 |
| DTXSID9022360 | 140-66-9    | 4-tert-Octylphenol                | Personal Care/Consumer<br>Product | BMI <= 30  | 4.57E+04 | 2.31E+04 | 2.87E+05 |
| DTXSID5022308 | 446-72-0    | Genistein                         | Phytoestrogens                    | BMI <= 30  | 1.22E+03 | 1.33E+03 | 1.52E+03 |
| DTXSID9022310 | 486-66-8    | Daidzein                          | Phytoestrogens                    | BMI <= 30  | 7.57E+02 | 8.23E+02 | 9.20E+02 |
| DTXSID2020686 | 58-89-9     | Lindane                           | Fungicides                        | BMI <= 30  | 1.30E+05 | 6.21E+03 | 5.73E+07 |
| DTXSID7020687 | 608-73-1    | Hexachlorocyclohexane             | Fungicides                        | BMI <= 30  | 1.84E+05 | 6.48E+03 | 5.89E+07 |
| DTXSID7021106 | 87-86-5     | Pentachlorophenol                 | Fungicides                        | BMI <= 30  | 3.43E+05 | 1.22E+04 | 1.84E+08 |
| DTXSID2021151 | 90-43-7     | ortho-Phenylphenol                | Fungicides                        | BMI <= 30  | 2.82E+04 | 2.72E+04 | 3.44E+04 |
| DTXSID5021388 | 93-76-5     | 2,4,5-Trichlorophenoxyacetic acid | Herbicides                        | BMI <= 30  | 5.32E+05 | 1.63E+05 | 3.54E+07 |
| DTXSID1032642 | 122931-48-0 | Rimsulfuron                       | Sulfonyl Urea Herbicides          | BMI <= 30  | 3.19E+08 | 1.83E+07 | 2.47E+11 |
| DTXSID4034364 | 144651-06-9 | Oxasulfuron                       | Sulfonyl Urea Herbicides          | BMI <= 30  | 4.51E+08 | 2.43E+07 | 3.59E+11 |
| DTXSID7034753 | 173159-57-4 | Foramsulfuron                     | Sulfonyl Urea Herbicides          | BMI <= 30  | 2.18E+08 | 1.13E+07 | 1.07E+11 |
| DTXSID9020112 | 1912-24-9   | Atrazine                          | Herbicides                        | BMI <= 30  | 1.79E+06 | 1.83E+05 | 6.71E+07 |
| DTXSID8023846 | 30560-19-1  | Acephate                          | Organophosphorus<br>Insecticides  | BMI <= 30  | 1.26E+06 | 3.87E+05 | 1.68E+07 |
| DTXSID6023864 | 74223-64-6  | Metsulfuron-methyl                | Sulfonyl Urea Herbicides          | BMI <= 30  | 5.39E+07 | 1.01E+07 | 4.56E+09 |
| DTXSID7024164 | 83055-99-6  | Bensulfuron-methyl                | Sulfonyl Urea Herbicides          | BMI <= 30  | 2.76E+08 | 1.44E+07 | 1.63E+11 |
| DTXSID9034573 | 97780-06-8  | Ethametsulfuron-methyl            | Sulfonyl Urea Herbicides          | BMI <= 30  | 6.41E+07 | 3.36E+06 | 3.54E+10 |
| DTXSID7021948 | 114-26-1    | Propoxur                          | Carbamate Pesticides              | BMI <= 30  | 1.41E+08 | 2.53E+06 | 3.16E+11 |
| DTXSID9020249 | 1563-66-2   | Carbofuran                        | Carbamate Pesticides              | BMI <= 30  | 1.26E+07 | 3.36E+05 | 3.56E+10 |
| DTXSID8023848 | 34256-82-1  | Acetochlor                        | Unknown                           | BMI <= 30  | 6.80E+06 | 2.07E+06 | 1.41E+08 |
| DTXSID4022448 | 51218-45-2  | Metolachlor                       | Herbicides                        | BMI <= 30  | 3.43E+06 | 9.40E+05 | 4.94E+07 |
| DTXSID1022265 | 15972-60-8  | Alachlor                          | Herbicides                        | BMI <= 30  | 2.12E+06 | 1.43E+06 | 3.80E+06 |
| DTXSID2021284 | 100-42-5    | Styrene                           | Volatile Organic<br>Compounds     | BMI > 30   | 5.11E+02 | 1.56E+02 | 2.11E+06 |
| DTXSID1020431 | 106-46-7    | para-Dichlorobenzene              | Personal Care/Consumer<br>Product | BMI > 30   | 1.35E+04 | 1.17E+04 | 1.37E+04 |
| DTXSID3020203 | 106-99-0    | 1,3-Butadiene                     | Volatile Organic<br>Compounds     | BMI > 30   | 8.53E+02 | 6.95E+02 | 7.18E+02 |
| DTXSID5020029 | 107-13-1    | Acrylonitrile                     | Volatile Organic<br>Compounds     | BMI > 30   | 7.31E+04 | 6.72E+04 | 7.96E+04 |

| DTXSID        | CAS        | Chemical                        | ChemicalClass                    | Population | BER      | lowCI    | upCI     |
|---------------|------------|---------------------------------|----------------------------------|------------|----------|----------|----------|
| DTXSID7021360 | 108-88-3   | Toulene                         | Volatile Organic Compounds       | BMI > 30   | 1.84E+04 | 1.45E+04 | 1.54E+04 |
| DTXSID9022528 | 120-47-8   | Ethyl paraben                   | Personal Care/Consumer Product   | BMI > 30   | 1.22E+05 | 5.87E+04 | 7.74E+04 |
| DTXSID2021319 | 127-18-4   | Tetrachloroethene               | Volatile Organic Compounds       | BMI > 30   | 1.01E+05 | 1.04E+04 | 2.27E+07 |
| DTXSID3024289 | 129-00-0   | Pyrene                          | Polycyclic Aromatic Hydrocarbons | BMI > 30   | 1.66E+04 | 1.32E+04 | 1.43E+04 |
| DTXSID3022405 | 131-57-7   | Benzophenone-3                  | Personal Care/Consumer Product   | BMI > 30   | 4.13E+03 | 2.87E+03 | 3.39E+03 |
| DTXSID5032498 | 3380-34-5  | Triclosan                       | Personal Care/Consumer Product   | BMI > 30   | 9.55E+03 | 7.08E+03 | 8.61E+03 |
| DTXSID9020247 | 63-25-2    | Carbaryl                        | Polycyclic Aromatic Hydrocarbons | BMI > 30   | 2.43E+04 | 1.44E+04 | 2.30E+07 |
| DTXSID3039242 | 71-43-2    | Benzene                         | Volatile Organic Compounds       | BMI > 30   | 2.78E+05 | 2.14E+05 | 2.34E+05 |
| DTXSID0021383 | 79-01-6    | Trichloroethene                 | Volatile Organic Compounds       | BMI > 30   | 9.02E+05 | 6.61E+04 | 4.23E+08 |
| DTXSID7020182 | 80-05-7    | Bisphenol A                     | Personal Care/Consumer Product   | BMI > 30   | 2.58E+04 | 2.25E+04 | 2.41E+04 |
| DTXSID3022409 | 80-09-1    | Bisphenol S                     | Personal Care/Consumer Product   | BMI > 30   | 1.16E+05 | 1.07E+05 | 1.18E+05 |
| DTXSID7021780 | 84-66-2    | Diethyl phthalate               | Phthalates                       | BMI > 30   | 1.85E+03 | 1.63E+03 | 1.79E+03 |
| DTXSID9022522 | 84-69-5    | Di-isobutyl phthalate           | Phthalates                       | BMI > 30   | 1.05E+04 | 8.40E+03 | 8.92E+03 |
| DTXSID2021781 | 84-74-2    | Dibutyl phthalate               | Phthalates                       | BMI > 30   | 1.05E+04 | 1.76E+03 | 1.30E+07 |
| DTXSID8024105 | 86-73-7    | Fluorene                        | Polycyclic Aromatic Hydrocarbons | BMI > 30   | 5.16E+04 | 4.36E+04 | 4.60E+04 |
| DTXSID8020913 | 91-20-3    | Naphthalene                     | Polycyclic Aromatic Hydrocarbons | BMI > 30   | 3.07E+04 | 2.45E+03 | 6.53E+07 |
| DTXSID4022527 | 94-13-3    | n-propyl paraben                | Personal Care/Consumer Product   | BMI > 30   | 1.40E+04 | 1.09E+04 | 1.27E+04 |
| DTXSID3020209 | 94-26-8    | Butyl paraben                   | Personal Care/Consumer Product   | BMI > 30   | 5.99E+05 | 4.42E+05 | 1.70E+06 |
| DTXSID0020442 | 94-75-7    | 2,4-Dichlorophenoxyacetic acid  | Personal Care/Consumer Product   | BMI > 30   | 4.13E+04 | 3.30E+03 | 8.93E+06 |
| DTXSID4022529 | 99-76-3    | Methyl paraben                  | Personal Care/Consumer Product   | BMI > 30   | 2.95E+03 | 2.28E+03 | 2.63E+03 |
| DTXSID5021411 | 115-96-8   | Tris(2-chloroethyl) phosphite   | Flame Retardant                  | BMI > 30   | 3.75E+05 | 2.92E+05 | 3.21E+05 |
| DTXSID3021986 | 126-73-8   | Tri-n-butyl phosphate (TBP)     | Flame Retardant                  | BMI > 30   | 2.58E+03 | 1.89E+03 | 2.04E+03 |
| DTXSID2021995 | 134-62-3   | N,N-Diethyl-3-methylbenzylamine | Insect Repellent                 | BMI > 30   | 1.67E+06 | 9.34E+05 | 8.33E+06 |
| DTXSID7022174 | 2104-64-5  | EPN                             | Organophosphorus Insecticides    | BMI > 30   | 1.01E+05 | 2.92E+03 | 2.25E+08 |
| DTXSID4020458 | 2921-88-2  | Chlorpyrifos                    | Organophosphorus Insecticides    | BMI > 30   | 5.92E+03 | 5.77E+02 | 2.36E+07 |
| DTXSID1020855 | 298-00-0   | Methyl parathion                | Organophosphorus Insecticides    | BMI > 30   | 1.21E+06 | 4.13E+04 | 2.84E+09 |
| DTXSID9020407 | 333-41-5   | Diazinon                        | Organophosphorus Insecticides    | BMI > 30   | 1.53E+06 | 1.03E+06 | 1.42E+06 |
| DTXSID8022292 | 52645-53-1 | Permethrin                      | Pyrethroids                      | BMI > 30   | 1.56E+05 | 1.61E+05 | 8.59E+08 |
| DTXSID5035957 | 68359-37-5 | Cyfluthrin                      | Pyrethroids                      | BMI > 30   | 2.66E+05 | 1.45E+05 | 1.49E+06 |
| DTXSID3020964 | 98-95-3    | Nitrobenzene                    | Organophosphorus Insecticides    | BMI > 30   | 3.43E+06 | 9.94E+04 | 6.01E+09 |
| DTXSID4020791 | 121-75-5   | Malathion                       | Organophosphorus Insecticides    | BMI > 30   | 1.07E+06 | 2.80E+04 | 3.34E+08 |
| DTXSID2022254 | 13071-79-9 | Terbufos                        | Organophosphorus Insecticides    | BMI > 30   | 2.33E+06 | 6.19E+04 | 5.57E+08 |
| DTXSID3022455 | 131-11-3   | Dimethyl phthalate              | Phthalates                       | BMI > 30   | 4.87E+04 | 3.48E+04 | 4.04E+04 |

| DTXSID        | CAS         | Chemical                 | ChemicalClass                     | Population | BER      | lowCI    | upCI     |
|---------------|-------------|--------------------------|-----------------------------------|------------|----------|----------|----------|
| DTXSID9023914 | 141-66-2    | Dicrotophos              | Organophosphorus<br>Insecticides  | BMI > 30   | 5.41E+05 | 1.79E+04 | 2.40E+08 |
| DTXSID0024266 | 29232-93-7  | Pirimiphos-methyl        | Organophosphorus<br>Insecticides  | BMI > 30   | 4.00E+05 | 1.17E+04 | 1.75E+08 |
| DTXSID4032459 | 298-02-2    | Phorate                  | Organophosphorus<br>Insecticides  | BMI > 30   | 6.48E+04 | 1.90E+03 | 1.65E+07 |
| DTXSID7024328 | 3689-24-5   | Sulfotepp                | Organophosphorus<br>Insecticides  | BMI > 30   | 3.38E+05 | 1.51E+04 | 2.13E+08 |
| DTXSID0021389 | 52-68-6     | Trichlorfon              | Organophosphorus<br>Insecticides  | BMI > 30   | 6.02E+05 | 1.78E+04 | 3.55E+08 |
| DTXSID2032344 | 54593-83-8  | Chlorethoxyphos          | Organophosphorus<br>Insecticides  | BMI > 30   | 3.25E+05 | 1.61E+04 | 2.05E+08 |
| DTXSID2020347 | 56-72-4     | Coumaphos                | Organophosphorus<br>Insecticides  | BMI > 30   | 4.74E+04 | 2.09E+03 | 2.32E+07 |
| DTXSID2024086 | 563-12-2    | Ethion                   | Organophosphorus<br>Insecticides  | BMI > 30   | 2.54E+05 | 5.85E+03 | 5.28E+07 |
| DTXSID7020479 | 60-51-5     | Dimethoate               | Organophosphorus<br>Insecticides  | BMI > 30   | 8.05E+05 | 2.28E+04 | 3.01E+08 |
| DTXSID5020449 | 62-73-7     | Dichlorvos               | Organophosphorus<br>Insecticides  | BMI > 30   | 3.16E+05 | 8.51E+03 | 1.48E+08 |
| DTXSID5024261 | 732-11-6    | Phosmet                  | Organophosphorus<br>Insecticides  | BMI > 30   | 6.55E+05 | 2.02E+04 | 2.62E+08 |
| DTXSID3020122 | 86-50-0     | Azinphos methyl          | Organophosphorus<br>Insecticides  | BMI > 30   | 6.61E+05 | 1.94E+04 | 2.27E+08 |
| DTXSID5020819 | 950-37-8    | Methidathion             | Organophosphorus<br>Insecticides  | BMI > 30   | 7.52E+05 | 2.16E+04 | 2.30E+08 |
| DTXSID9022360 | 140-66-9    | 4-tert-Octylphenol       | Personal Care/Consumer<br>Product | BMI > 30   | 4.41E+04 | 2.31E+04 | 2.87E+05 |
| DTXSID5022308 | 446-72-0    | Genistein                | Phytoestrogens                    | BMI > 30   | 2.02E+03 | 1.33E+03 | 1.52E+03 |
| DTXSID9022310 | 486-66-8    | Daidzein                 | Phytoestrogens                    | BMI > 30   | 1.21E+03 | 8.23E+02 | 9.20E+02 |
| DTXSID2020686 | 58-89-9     | Lindane                  | Fungicides                        | BMI > 30   | 1.73E+05 | 6.21E+03 | 5.73E+07 |
| DTXSID7020687 | 608-73-1    | Hexachlorocyclohexane    | Fungicides                        | BMI > 30   | 2.09E+05 | 6.48E+03 | 5.89E+07 |
| DTXSID7021106 | 87-86-5     | Pentachlorophenol        | Fungicides                        | BMI > 30   | 4.35E+05 | 1.22E+04 | 1.84E+08 |
| DTXSID2021151 | 90-43-7     | ortho-Phenylphenol       | Fungicides                        | BMI > 30   | 3.27E+04 | 2.72E+04 | 3.44E+04 |
| DTXSID5021388 | 93-76-5     | 2,4,5-Trichlorophenoxyac | Herbicides                        | BMI > 30   | 3.36E+06 | 1.63E+05 | 3.54E+07 |
| DTXSID1032642 | 122931-48-0 | Rimsulfuron              | Sulfonyl Urea Herbicides          | BMI > 30   | 2.92E+08 | 1.83E+07 | 2.47E+11 |
| DTXSID4034364 | 144651-06-9 | Oxasulfuron              | Sulfonyl Urea Herbicides          | BMI > 30   | 3.68E+08 | 2.43E+07 | 3.59E+11 |
| DTXSID7034753 | 173159-57-4 | Foramsulfuron            | Sulfonyl Urea Herbicides          | BMI > 30   | 1.93E+08 | 1.13E+07 | 1.07E+11 |
| DTXSID9020112 | 1912-24-9   | Atrazine                 | Herbicides                        | BMI > 30   | 1.45E+06 | 1.83E+05 | 6.71E+07 |
| DTXSID8023846 | 30560-19-1  | Acephate                 | Organophosphorus<br>Insecticides  | BMI > 30   | 1.28E+06 | 3.87E+05 | 1.68E+07 |
| DTXSID6023864 | 74223-64-6  | Metsulfuron-methyl       | Sulfonyl Urea Herbicides          | BMI > 30   | 3.00E+08 | 1.01E+07 | 4.56E+09 |
| DTXSID7024164 | 83055-99-6  | Bensulfuron-methyl       | Sulfonyl Urea Herbicides          | BMI > 30   | 2.20E+08 | 1.44E+07 | 1.63E+11 |
| DTXSID9034573 | 97780-06-8  | Ethametsulfuron-methyl   | Sulfonyl Urea Herbicides          | BMI > 30   | 5.30E+07 | 3.36E+06 | 3.54E+10 |
| DTXSID7021948 | 114-26-1    | Propoxur                 | Carbamate Pesticides              | BMI > 30   | 1.37E+08 | 2.53E+06 | 3.16E+11 |
| DTXSID9020249 | 1563-66-2   | Carbofuran               | Carbamate Pesticides              | BMI > 30   | 1.75E+07 | 3.36E+05 | 3.56E+10 |
| DTXSID8023848 | 34256-82-1  | Acetochlor               | Unknown                           | BMI > 30   | 1.61E+07 | 2.07E+06 | 1.41E+08 |
| DTXSID4022448 | 51218-45-2  | Metolachlor              | Herbicides                        | BMI > 30   | 3.08E+06 | 9.40E+05 | 4.94E+07 |
| DTXSID1022265 | 15972-60-8  | Alachlor                 | Herbicides                        | BMI > 30   | 2.35E+06 | 1.43E+06 | 3.80E+06 |

Table S8. Fold change in exposure between all NHANES participants and children population groups (age 3 to 5 and age 6 to 11)

| DTXSID         | CAS        | Name                      | ChemicalClass                    | Comparison | FC    | lowCI | upCI  |
|----------------|------------|---------------------------|----------------------------------|------------|-------|-------|-------|
| DTXSID3020596  | 100-41-4   | Ethylbenzene              | Volatile Organic Compounds       | 3-5:Total  | 3.064 | 2.864 | 3.283 |
| DTXSID2021284  | 100-42-5   | Styrene                   | Volatile Organic Compounds       | 3-5:Total  | 1.384 | 1.314 | 1.457 |
| DTXSID4026214  | 101-20-2   | Triclocarban              | Personal Care/Consumer Product   | 3-5:Total  | 0.974 | 0.961 | 0.989 |
| DTXSID1020431  | 106-46-7   | para-Dichlorobenzene      | Personal Care/Consumer Product   | 3-5:Total  | 2.837 | 2.806 | 2.868 |
| DTXSID6021874  | 106-94-5   | 1-Bromopropane            | Volatile Organic Compounds       | 3-5:Total  | 1.277 | 1.271 | 1.282 |
| DTXSID3020203  | 106-99-0   | 1,3-Butadiene             | Volatile Organic Compounds       | 3-5:Total  | 2.427 | 2.423 | 2.430 |
| DTXSID5020023  | 107-02-8   | Acrolein                  | Volatile Organic Compounds       | 3-5:Total  | 2.013 | 2.010 | 2.016 |
| DTXSID5020029  | 107-13-1   | Acrylonitrile             | Volatile Organic Compounds       | 3-5:Total  | 1.325 | 1.322 | 1.329 |
| DTXSID7021360  | 108-88-3   | Toulene                   | Volatile Organic Compounds       | 3-5:Total  | 2.913 | 2.908 | 2.919 |
| DTXSID5020607  | 117-81-7   | Di-2-ethylhexyl phthalate | Phthalates                       | 3-5:Total  | 5.221 | 5.216 | 5.226 |
| DTXSID1021956  | 117-84-0   | Di-n-octyl phthalate      | Phthalates                       | 3-5:Total  | 5.413 | 5.396 | 5.429 |
| DTXSID9022528  | 120-47-8   | Ethyl paraben             | Personal Care/Consumer Product   | 3-5:Total  | 1.872 | 1.840 | 1.903 |
| DTXSID2021319  | 127-18-4   | Tetrachloroethene         | Volatile Organic Compounds       | 3-5:Total  | 2.093 | 1.917 | 2.288 |
| DTXSID3024289  | 129-00-0   | Pyrene                    | Polycyclic Aromatic Hydrocarbons | 3-5:Total  | 3.038 | 3.031 | 3.045 |
| DTXSID3022405  | 131-57-7   | Benzophenone-3            | Personal Care/Consumer Product   | 3-5:Total  | 2.975 | 2.937 | 3.013 |
| DTXSID2021446  | 1330-20-7  | Xylene                    | Volatile Organic Compounds       | 3-5:Total  | 1.797 | 1.793 | 1.801 |
| DTXSID7074828  | 13464-58-9 | Arsenous acid             | Metals and Metalloids            | 3-5:Total  | 2.593 | 2.576 | 2.611 |
| DTXSID5024217  | 14797-55-8 | Nitrate                   | Perchlorate and Other Anions     | 3-5:Total  | 3.155 | 3.151 | 3.160 |
| DTXSID6024252  | 14797-73-0 | Perclorate                | Perchlorate and Other Anions     | 3-5:Total  | 4.213 | 4.201 | 4.224 |
| DTXSID7020970  | 1836-75-5  | Nitrofen                  | NA                               | 3-5:Total  | 2.845 | 2.615 | 3.094 |
| DTXSID4025082  | 26761-40-0 | Di-isodecyl phthalate     | Phthalates                       | 3-5:Total  | 3.872 | 3.864 | 3.879 |
| DTXSID4022521  | 28553-12-0 | Di-isononyl phthalate     | Phthalates                       | 3-5:Total  | 3.543 | 3.530 | 3.556 |
| DTXSID8047763  | 302-04-5   | Thiocyanate               | Perchlorate and Other Anions     | 3-5:Total  | 0.407 | 0.370 | 0.444 |
| DTXSID6058055  | 32861-85-1 | Chlomethoxyfen            | Personal Care/Consumer Product   | 3-5:Total  | 2.936 | 2.697 | 3.195 |
| DTXSID5032498  | 3380-34-5  | Triclosan                 | Personal Care/Consumer Product   | 3-5:Total  | 1.866 | 1.852 | 1.880 |
| DTXSID8042349  | 34643-46-4 | Prothiofos                | Personal Care/Consumer Product   | 3-5:Total  | 2.854 | 2.629 | 3.097 |
| DTXSID0058069  | 36519-00-3 | Phosdiphen                | Personal Care/Consumer Product   | 3-5:Total  | 2.965 | 2.731 | 3.218 |
| DTXSID80873153 | 39895-81-3 | Arsenocholine             | Metals and Metalloids            | 3-5:Total  | 1.071 | 1.044 | 1.098 |
| DTXSID1040320  | 42576-02-3 | Bifenox                   | Personal Care/Consumer Product   | 3-5:Total  | 2.808 | 2.588 | 3.047 |
| DTXSID8058118  | 52570-16-8 | Naproanilide              | Polycyclic Aromatic Hydrocarbons | 3-5:Total  | 2.059 | 2.050 | 2.068 |

| DTXSID        | CAS        | Name                           | ChemicalClass                    | Comparison | FC    | lowCI | upCI  |
|---------------|------------|--------------------------------|----------------------------------|------------|-------|-------|-------|
| DTXSID6022056 | 541-73-1   | 1,3-dichlorobenzene            | Personal Care/Consumer Product   | 3-5:Total  | 2.977 | 2.740 | 3.235 |
| DTXSID6023991 | 57-12-5    | Cyanide                        | NA                               | 3-5:Total  | 5.611 | 5.322 | 5.931 |
| DTXSID9022445 | 620-92-8   | Bisphenol F                    | Personal Care/Consumer Product   | 3-5:Total  | 1.041 | 1.032 | 1.051 |
| DTXSID9020247 | 63-25-2    | Carbaryl                       | Polycyclic Aromatic Hydrocarbons | 3-5:Total  | 1.516 | 1.449 | 1.585 |
| DTXSID0052833 | 64436-13-1 | Arsenobetaine                  | Metals and Metalloids            | 3-5:Total  | 1.028 | 1.014 | 1.043 |
| DTXSID6020515 | 68-12-2    | N,N-Dimethylformamide          | Volatile Organic Compounds       | 3-5:Total  | 0.995 | 0.994 | 0.996 |
| DTXSID3039242 | 71-43-2    | Benzene                        | Volatile Organic Compounds       | 3-5:Total  | 2.867 | 2.858 | 2.876 |
| DTXSID2024161 | 7439-92-1  | Lead                           | Metals and Metalloids            | 3-5:Total  | 2.640 | 2.634 | 2.646 |
| DTXSID2024169 | 7439-96-5  | Manganese                      | Metals and Metalloids            | 3-5:Total  | 3.731 | 3.715 | 3.747 |
| DTXSID1024172 | 7439-97-6  | Mercury                        | Metals and Metalloids            | 3-5:Total  | 0.703 | 0.692 | 0.714 |
| DTXSID1024207 | 7439-98-7  | Molybdenum                     | Metals and Metalloids            | 3-5:Total  | 3.886 | 3.879 | 3.893 |
| DTXSID3024312 | 7440-24-6  | Strontium                      | Metals and Metalloids            | 3-5:Total  | 1.833 | 1.828 | 1.837 |
| DTXSID2036035 | 7440-28-0  | Thallium                       | Metals and Metalloids            | 3-5:Total  | 2.852 | 2.848 | 2.855 |
| DTXSID1049801 | 7440-31-5  | Tin                            | Metals and Metalloids            | 3-5:Total  | 6.844 | 6.825 | 6.863 |
| DTXSID8052481 | 7440-33-7  | Tungsten                       | Metals and Metalloids            | 3-5:Total  | 4.963 | 4.946 | 4.981 |
| DTXSID5023879 | 7440-36-0  | Antimony                       | Metals and Metalloids            | 3-5:Total  | 3.175 | 3.167 | 3.183 |
| DTXSID8023894 | 7440-39-3  | Barium                         | Metals and Metalloids            | 3-5:Total  | 2.419 | 2.413 | 2.424 |
| DTXSID1023940 | 7440-43-9  | Cadmium                        | Metals and Metalloids            | 3-5:Total  | 0.355 | 0.354 | 0.356 |
| DTXSID5036767 | 7440-46-2  | Cesium                         | Metals and Metalloids            | 3-5:Total  | 2.698 | 2.694 | 2.702 |
| DTXSID1042522 | 7440-61-1  | Uranium                        | Metals and Metalloids            | 3-5:Total  | 2.276 | 2.264 | 2.288 |
| DTXSID5021207 | 75-56-9    | Propylene oxide                | Volatile Organic Compounds       | 3-5:Total  | 1.854 | 1.849 | 1.859 |
| DTXSID7020508 | 75-60-5    | Dimethylarsinic acid           | Metals and Metalloids            | 3-5:Total  | 2.563 | 2.557 | 2.570 |
| DTXSID1034341 | 7778-39-4  | Arsenic acid                   | Metals and Metalloids            | 3-5:Total  | 1.639 | 1.579 | 1.703 |
| DTXSID0021383 | 79-01-6    | Trichloroethene                | Volatile Organic Compounds       | 3-5:Total  | 2.108 | 1.907 | 2.332 |
| DTXSID5020027 | 79-06-1    | Acrylamide                     | Volatile Organic Compounds       | 3-5:Total  | 2.334 | 2.330 | 2.338 |
| DTXSID7020182 | 80-05-7    | Bisphenol A                    | Personal Care/Consumer Product   | 3-5:Total  | 3.723 | 3.704 | 3.742 |
| DTXSID3022409 | 80-09-1    | Bisphenol S                    | Personal Care/Consumer Product   | 3-5:Total  | 2.903 | 2.889 | 2.916 |
| DTXSID7021780 | 84-66-2    | Diethyl phthalate              | Phthalates                       | 3-5:Total  | 1.877 | 1.872 | 1.882 |
| DTXSID9022522 | 84-69-5    | Di-isobutyl phthalate          | Phthalates                       | 3-5:Total  | 3.620 | 3.611 | 3.628 |
| DTXSID2021781 | 84-74-2    | Dibutyl phthalate              | Phthalates                       | 3-5:Total  | 2.930 | 2.724 | 3.149 |
| DTXSID6024254 | 85-01-8    | Phenanthrene                   | Polycyclic Aromatic Hydrocarbons | 3-5:Total  | 1.886 | 1.883 | 1.889 |
| DTXSID3020205 | 85-68-7    | Benzylbutyl phthalate          | Phthalates                       | 3-5:Total  | 4.685 | 4.603 | 4.769 |
| DTXSID8024105 | 86-73-7    | Fluorene                       | Polycyclic Aromatic Hydrocarbons | 3-5:Total  | 1.651 | 1.649 | 1.652 |
| DTXSID4022527 | 94-13-3    | n-propyl paraben               | Personal Care/Consumer Product   | 3-5:Total  | 2.564 | 2.547 | 2.580 |
| DTXSID3020209 | 94-26-8    | Butyl paraben                  | Personal Care/Consumer Product   | 3-5:Total  | 1.042 | 1.021 | 1.063 |
| DTXSID0020442 | 94-75-7    | 2,4-Dichlorophenoxyacetic acid | NA                               | 3-5:Total  | 2.715 | 2.498 | 2.950 |
| DTXSID8040274 | 97-17-6    | Dichlofenthion                 | Personal Care/Consumer Product   | 3-5:Total  | 2.798 | 2.579 | 3.034 |
| DTXSID4022529 | 99-76-3    | Methyl paraben                 | Personal Care/Consumer Product   | 3-5:Total  | 2.356 | 2.342 | 2.370 |

| DTXSID         | CAS        | Name                      | ChemicalClass                    | Comparison | FC    | lowCI | upCI  |
|----------------|------------|---------------------------|----------------------------------|------------|-------|-------|-------|
| DTXSID3020596  | 100-41-4   | Ethylbenzene              | Volatile Organic Compounds       | 6-11:Total | 2.122 | 1.984 | 2.273 |
| DTXSID2021284  | 100-42-5   | Styrene                   | Volatile Organic Compounds       | 6-11:Total | 0.957 | 0.910 | 1.007 |
| DTXSID4026214  | 101-20-2   | Triclocarban              | Personal Care/Consumer Product   | 6-11:Total | 1.062 | 1.048 | 1.076 |
| DTXSID1020431  | 106-46-7   | para-Dichlorobenzene      | Personal Care/Consumer Product   | 6-11:Total | 1.991 | 1.971 | 2.012 |
| DTXSID6021874  | 106-94-5   | 1-Bromopropane            | Volatile Organic Compounds       | 6-11:Total | 0.946 | 0.942 | 0.951 |
| DTXSID3020203  | 106-99-0   | 1,3-Butadiene             | Volatile Organic Compounds       | 6-11:Total | 1.469 | 1.468 | 1.471 |
| DTXSID5020023  | 107-02-8   | Acrolein                  | Volatile Organic Compounds       | 6-11:Total | 1.286 | 1.284 | 1.289 |
| DTXSID5020029  | 107-13-1   | Acrylonitrile             | Volatile Organic Compounds       | 6-11:Total | 0.797 | 0.794 | 0.800 |
| DTXSID7021360  | 108-88-3   | Toulene                   | Volatile Organic Compounds       | 6-11:Total | 1.402 | 1.399 | 1.405 |
| DTXSID5020607  | 117-81-7   | Di-2-ethylhexyl phthalate | Phthalates                       | 6-11:Total | 2.383 | 2.381 | 2.386 |
| DTXSID1021956  | 117-84-0   | Di-n-octyl phthalate      | Phthalates                       | 6-11:Total | 2.522 | 2.515 | 2.528 |
| DTXSID9022528  | 120-47-8   | Ethyl paraben             | Personal Care/Consumer Product   | 6-11:Total | 0.708 | 0.696 | 0.719 |
| DTXSID2021319  | 127-18-4   | Tetrachloroethene         | Volatile Organic Compounds       | 6-11:Total | 2.213 | 2.025 | 2.419 |
| DTXSID3024289  | 129-00-0   | Pyrene                    | Polycyclic Aromatic Hydrocarbons | 6-11:Total | 1.793 | 1.789 | 1.798 |
| DTXSID3022405  | 131-57-7   | Benzophenone-3            | Personal Care/Consumer Product   | 6-11:Total | 1.618 | 1.605 | 1.631 |
| DTXSID2021446  | 1330-20-7  | Xylene                    | Volatile Organic Compounds       | 6-11:Total | 1.002 | 0.999 | 1.005 |
| DTXSID7074828  | 13464-58-9 | Arsenous acid             | Metals and Metalloids            | 6-11:Total | 1.819 | 1.807 | 1.831 |
| DTXSID5024217  | 14797-55-8 | Nitrate                   | Perchlorate and Other Anions     | 6-11:Total | 1.744 | 1.741 | 1.746 |
| DTXSID6024252  | 14797-73-0 | Perchlorate               | Perchlorate and Other Anions     | 6-11:Total | 2.062 | 2.056 | 2.068 |
| DTXSID7020970  | 1836-75-5  | Nitrofen                  | NA                               | 6-11:Total | 1.841 | 1.695 | 1.999 |
| DTXSID4025082  | 26761-40-0 | Di-isodecyl phthalate     | Phthalates                       | 6-11:Total | 1.929 | 1.925 | 1.933 |
| DTXSID4022521  | 28553-12-0 | Di-isononyl phthalate     | Phthalates                       | 6-11:Total | 1.988 | 1.981 | 1.995 |
| DTXSID8047763  | 302-04-5   | Thiocyanate               | Perchlorate and Other Anions     | 6-11:Total | 0.394 | 0.365 | 0.424 |
| DTXSID6058055  | 32861-85-1 | Chlomoxyfen               | Personal Care/Consumer Product   | 6-11:Total | 1.808 | 1.666 | 1.962 |
| DTXSID5032498  | 3380-34-5  | Triclosan                 | Personal Care/Consumer Product   | 6-11:Total | 1.346 | 1.335 | 1.357 |
| DTXSID8042349  | 34643-46-4 | Prothiofos                | Personal Care/Consumer Product   | 6-11:Total | 1.851 | 1.707 | 2.007 |
| DTXSID0058069  | 36519-00-3 | Phosdiphen                | Personal Care/Consumer Product   | 6-11:Total | 1.843 | 1.695 | 2.003 |
| DTXSID80873153 | 39895-81-3 | Arsenocholine             | Metals and Metalloids            | 6-11:Total | 1.084 | 1.056 | 1.113 |
| DTXSID1040320  | 42576-02-3 | Bifenox                   | Personal Care/Consumer Product   | 6-11:Total | 1.765 | 1.626 | 1.917 |
| DTXSID8058118  | 52570-16-8 | Naproanilide              | Polycyclic Aromatic Hydrocarbons | 6-11:Total | 1.195 | 1.191 | 1.200 |
| DTXSID6022056  | 541-73-1   | 1,3-dichlorobenzene       | Personal Care/Consumer Product   | 6-11:Total | 1.827 | 1.681 | 1.984 |

| DTXSID        | CAS        | Name                           | ChemicalClass                    | Comparison | FC    | lowCI | upCI  |
|---------------|------------|--------------------------------|----------------------------------|------------|-------|-------|-------|
| DTXSID6023991 | 57-12-5    | Cyanide                        | NA                               | 6-11:Total | 3.380 | 3.200 | 3.580 |
| DTXSID9022445 | 620-92-8   | Bisphenol F                    | Personal Care/Consumer Product   | 6-11:Total | 1.097 | 1.084 | 1.111 |
| DTXSID9020247 | 63-25-2    | Carbaryl                       | Polycyclic Aromatic Hydrocarbons | 6-11:Total | 0.870 | 0.832 | 0.910 |
| DTXSID0052833 | 64436-13-1 | Arsenobetaine                  | Metals and Metalloids            | 6-11:Total | 1.193 | 1.178 | 1.209 |
| DTXSID6020515 | 68-12-2    | N,N-Dimethylformamide          | Volatile Organic Compounds       | 6-11:Total | 0.653 | 0.652 | 0.654 |
| DTXSID3039242 | 71-43-2    | Benzene                        | Volatile Organic Compounds       | 6-11:Total | 1.770 | 1.765 | 1.775 |
| DTXSID2024161 | 7439-92-1  | Lead                           | Metals and Metalloids            | 6-11:Total | 1.374 | 1.371 | 1.377 |
| DTXSID2024169 | 7439-96-5  | Manganese                      | Metals and Metalloids            | 6-11:Total | 2.026 | 2.015 | 2.037 |
| DTXSID1024172 | 7439-97-6  | Mercury                        | Metals and Metalloids            | 6-11:Total | 0.493 | 0.488 | 0.497 |
| DTXSID1024207 | 7439-98-7  | Molybdenum                     | Metals and Metalloids            | 6-11:Total | 2.395 | 2.392 | 2.399 |
| DTXSID3024312 | 7440-24-6  | Strontium                      | Metals and Metalloids            | 6-11:Total | 1.322 | 1.319 | 1.325 |
| DTXSID2036035 | 7440-28-0  | Thallium                       | Metals and Metalloids            | 6-11:Total | 1.660 | 1.657 | 1.663 |
| DTXSID1049801 | 7440-31-5  | Tin                            | Metals and Metalloids            | 6-11:Total | 2.712 | 2.704 | 2.720 |
| DTXSID8052481 | 7440-33-7  | Tungsten                       | Metals and Metalloids            | 6-11:Total | 2.952 | 2.945 | 2.958 |
| DTXSID5023879 | 7440-36-0  | Antimony                       | Metals and Metalloids            | 6-11:Total | 2.074 | 2.068 | 2.079 |
| DTXSID8023894 | 7440-39-3  | Barium                         | Metals and Metalloids            | 6-11:Total | 1.720 | 1.715 | 1.725 |
| DTXSID1023940 | 7440-43-9  | Cadmium                        | Metals and Metalloids            | 6-11:Total | 0.369 | 0.368 | 0.371 |
| DTXSID5036767 | 7440-46-2  | Cesium                         | Metals and Metalloids            | 6-11:Total | 1.530 | 1.528 | 1.532 |
| DTXSID1042522 | 7440-61-1  | Uranium                        | Metals and Metalloids            | 6-11:Total | 1.368 | 1.362 | 1.374 |
| DTXSID5021207 | 75-56-9    | Propylene oxide                | Volatile Organic Compounds       | 6-11:Total | 1.193 | 1.191 | 1.195 |
| DTXSID7020508 | 75-60-5    | Dimethylarsinic acid           | Metals and Metalloids            | 6-11:Total | 1.591 | 1.588 | 1.594 |
| DTXSID1034341 | 7778-39-4  | Arsenic acid                   | Metals and Metalloids            | 6-11:Total | 1.481 | 1.424 | 1.541 |
| DTXSID0021383 | 79-01-6    | Trichloroethene                | Volatile Organic Compounds       | 6-11:Total | 2.195 | 1.986 | 2.428 |
| DTXSID5020027 | 79-06-1    | Acrylamide                     | Volatile Organic Compounds       | 6-11:Total | 1.474 | 1.472 | 1.476 |
| DTXSID7020182 | 80-05-7    | Bisphenol A                    | Personal Care/Consumer Product   | 6-11:Total | 1.603 | 1.598 | 1.608 |
| DTXSID3022409 | 80-09-1    | Bisphenol S                    | Personal Care/Consumer Product   | 6-11:Total | 1.190 | 1.187 | 1.193 |
| DTXSID7021780 | 84-66-2    | Diethyl phthalate              | Phthalates                       | 6-11:Total | 1.080 | 1.076 | 1.085 |
| DTXSID9022522 | 84-69-5    | Di-isobutyl phthalate          | Phthalates                       | 6-11:Total | 1.977 | 1.971 | 1.983 |
| DTXSID2021781 | 84-74-2    | Dibutyl phthalate              | Phthalates                       | 6-11:Total | 1.882 | 1.750 | 2.023 |
| DTXSID6024254 | 85-01-8    | Phenanthrene                   | Polycyclic Aromatic Hydrocarbons | 6-11:Total | 1.222 | 1.220 | 1.225 |
| DTXSID3020205 | 85-68-7    | Benzylbutyl phthalate          | Phthalates                       | 6-11:Total | 2.804 | 2.755 | 2.854 |
| DTXSID8024105 | 86-73-7    | Fluorene                       | Polycyclic Aromatic Hydrocarbons | 6-11:Total | 1.063 | 1.060 | 1.065 |
| DTXSID4022527 | 94-13-3    | n-propyl paraben               | Personal Care/Consumer Product   | 6-11:Total | 0.758 | 0.755 | 0.762 |
| DTXSID3020209 | 94-26-8    | Butyl paraben                  | Personal Care/Consumer Product   | 6-11:Total | 1.011 | 0.990 | 1.033 |
| DTXSID0020442 | 94-75-7    | 2,4-Dichlorophenoxyacetic acid | NA                               | 6-11:Total | 1.761 | 1.624 | 1.909 |
| DTXSID8040274 | 97-17-6    | Dichlofenthion                 | Personal Care/Consumer Product   | 6-11:Total | 1.822 | 1.678 | 1.979 |
| DTXSID4022529 | 99-76-3    | Methyl paraben                 | Personal Care/Consumer Product   | 6-11:Total | 0.816 | 0.813 | 0.820 |

Table S9. Comparison of bayesmarker median exposure inferences for all individuals to SEEM predictions for chemicals not in the SEEM training set for the four most recent NHANES cohorts. Exposure estimates are in mg/kg/day.

| Cohort | DTXSID         | CAS         | Name                              | ChemicalClass                  | Bayesmarker_<br>median |
|--------|----------------|-------------|-----------------------------------|--------------------------------|------------------------|
| 09-10  | DTXSID0047876  | 80226-00-2  | Enterodiol                        | Phytoestrogens                 | 6.81E-04               |
| 09-10  | DTXSID6023991  | 57-12-5     | Cyanide                           | Perchlorate and Other Anions   | 3.10E-05               |
| 09-10  | DTXSID6037512  | 5598-52-7   | Fospirate                         | Organophosphorus Insecticides  | 1.20E-06               |
| 09-10  | DTXSID9022310  | 486-66-8    | Daidzein                          | Phytoestrogens                 | 1.41E-03               |
| 09-10  | DTXSID5022308  | 446-72-0    | Genistein                         | Phytoestrogens                 | 5.60E-04               |
| 09-10  | DTXSID8047763  | 302-04-5    | Thiocyanate                       | Perchlorate and Other Anions   | 2.90E-04               |
| 11-12  | DTXSID5020027  | 79-06-1     | Acrylamide                        | Volatile Organic Compounds     | 4.05E-05               |
| 11-12  | DTXSID0021383  | 79-01-6     | Trichloroethene                   | Volatile Organic Compounds     | 1.53E-06               |
| 11-12  | DTXSID5021207  | 75-56-9     | Propylene oxide                   | Volatile Organic Compounds     | 1.50E-04               |
| 11-12  | DTXSID6023947  | 75-15-0     | Carbon disulfide                  | NA                             | 4.04E-05               |
| 11-12  | DTXSID3039242  | 71-43-2     | Benzene                           | Volatile Organic Compounds     | 2.83E-06               |
| 11-12  | DTXSID6020515  | 68-12-2     | N,N-Dimethylformamide             | Volatile Organic Compounds     | 8.36E-04               |
| 11-12  | DTXSID6023991  | 57-12-5     | Cyanide                           | Perchlorate and Other Anions   | 2.03E-03               |
| 11-12  | DTXSID8047763  | 302-04-5    | Thiocyanate                       | Perchlorate and Other Anions   | 5.01E-04               |
| 11-12  | DTXSID9052686  | 183658-27-7 | 2-Ethylhexyl-2,3,4,5-tetrabromo   | Flame Retardant                | 1.57E-07               |
| 11-12  | DTXSID3061897  | 1707-92-2   | Tribenzyl phosphate (TBzP)        | Flame Retardant                | 5.40E-08               |
| 11-12  | DTXSID5026259  | 13674-84-5  | Tris(1-chloro-2-propyl) phosphat  | Flame Retardant                | 2.30E-06               |
| 11-12  | DTXSID2021319  | 127-18-4    | Tetrachloroethene                 | Volatile Organic Compounds     | 7.37E-07               |
| 11-12  | DTXSID3021986  | 126-73-8    | Tri-n-butyl phosphate (TBuP)      | Flame Retardant                | 1.17E-06               |
| 11-12  | DTXSID5021411  | 115-96-8    | Tris(2-chloroethyl) phosphate (T  | Flame Retardant                | 9.36E-06               |
| 11-12  | DTXSID7021360  | 108-88-3    | Toulene                           | Volatile Organic Compounds     | 4.29E-05               |
| 11-12  | DTXSID5020029  | 107-13-1    | Acrylonitrile                     | Volatile Organic Compounds     | 1.36E-05               |
| 11-12  | DTXSID5020023  | 107-02-8    | Acrolein                          | Volatile Organic Compounds     | 1.41E-03               |
| 11-12  | DTXSID3020203  | 106-99-0    | 1,3-Butadiene                     | Volatile Organic Compounds     | 1.03E-03               |
| 11-12  | DTXSID6021874  | 106-94-5    | 1-Bromopropane                    | Volatile Organic Compounds     | 3.72E-05               |
| 11-12  | DTXSID2021284  | 100-42-5    | Styrene                           | Volatile Organic Compounds     | 2.14E-04               |
| 11-12  | DTXSID3020596  | 100-41-4    | Ethylbenzene                      | Volatile Organic Compounds     | 5.60E-05               |
| 13-14  | DTXSID3022409  | 80-09-1     | Bisphenol S                       | Personal Care/Consumer Product | 6.39E-06               |
| 13-14  | DTXSID5020027  | 79-06-1     | Acrylamide                        | Volatile Organic Compounds     | 3.61E-05               |
| 13-14  | DTXSID0021383  | 79-01-6     | Trichloroethene                   | Volatile Organic Compounds     | 3.77E-08               |
| 13-14  | DTXSID5052676  | 78-32-0     | Tri-p-cresylphosphate (TpCP)      | NA                             | 2.84E-07               |
| 13-14  | DTXSID4020745  | 76180-96-6  | 2-Amino-3-methyl-3H-imidazo[4     | Heterocyclic Amines            | 6.29E-10               |
| 13-14  | DTXSID5021207  | 75-56-9     | Propylene oxide                   | Volatile Organic Compounds     | 1.24E-04               |
| 13-14  | DTXSID6023947  | 75-15-0     | Carbon disulfide                  | NA                             | 4.55E-05               |
| 13-14  | DTXSID3039242  | 71-43-2     | Benzene                           | Volatile Organic Compounds     | 2.11E-06               |
| 13-14  | DTXSID5043766  | 68006-83-7  | 2-Amino-3-methyl-9H-pyrido[2      | Heterocyclic Amines            | 1.59E-09               |
| 13-14  | DTXSID6020515  | 68-12-2     | N,N-Dimethylformamide             | Volatile Organic Compounds     | 7.51E-04               |
| 13-14  | DTXSID5020657  | 67730-11-4  | 2-Amino-6-methyldipyrido[1,2-a    | Heterocyclic Amines            | 5.53E-10               |
| 13-14  | DTXSID0020658  | 67730-10-3  | 2-Aminodipyrido[1,2-a:3',2'-d] ir | Heterocyclic Amines            | 7.39E-10               |
| 13-14  | DTXSID5043768  | 62450-07-1  | 1-Methyl-3-amino-5H-pyrido[4,;    | Heterocyclic Amines            | 1.10E-09               |
| 13-14  | DTXSID0043767  | 62450-06-0  | 3-Amino-1,4-dimethyl-5H-pyrid     | Heterocyclic Amines            | 1.14E-09               |
| 13-14  | DTXSID9022445  | 620-92-8    | Bisphenol F                       | Personal Care/Consumer Product | 6.03E-06               |
| 13-14  | DTXSID6023991  | 57-12-5     | Cyanide                           | Perchlorate and Other Anions   | 9.57E-04               |
| 13-14  | DTXSID6037512  | 5598-52-7   | Fospirate                         | Organophosphorus Insecticides  | 1.31E-06               |
| 13-14  | DTXSID80197568 | 486-84-0    | 1-Methyl-9H-pyrido[3,4-b]indole   | Heterocyclic Amines            | 2.61E-06               |
| 13-14  | DTXSID8047763  | 302-04-5    | Thiocyanate                       | Perchlorate and Other Anions   | 4.00E-03               |
| 13-14  | DTXSID7020001  | 26148-68-5  | 2-Amino-9H-pyrido[2,3-b]indole    | Heterocyclic Amines            | 1.03E-08               |
| 13-14  | DTXSID2021070  | 244-63-3    | 9H-Pyrido[3,4-b]indole (Norharr   | Heterocyclic Amines            | 6.27E-06               |
| 13-14  | DTXSID9052686  | 183658-27-7 | 2-Ethylhexyl-2,3,4,5-tetrabromo   | Flame Retardant                | 1.41E-07               |
| 13-14  | DTXSID3061897  | 1707-92-2   | Tribenzyl phosphate (TBzP)        | Flame Retardant                | 4.38E-09               |
| 13-14  | DTXSID5026259  | 13674-84-5  | Tris(1-chloro-2-propyl) phosphat  | Flame Retardant                | 3.13E-06               |
| 13-14  | DTXSID2021319  | 127-18-4    | Tetrachloroethene                 | Volatile Organic Compounds     | 3.31E-08               |



| Cohort | DTXSID        | CAS         | Name                             | ChemicalClass                  | Bayesmarker_<br>median |
|--------|---------------|-------------|----------------------------------|--------------------------------|------------------------|
| 13-14  | DTXSID3021986 | 126-73-8    | Tri-n-butyl phosphate (TBuP)     | Flame Retardant                | 3.80E-06               |
| 13-14  | DTXSID5021411 | 115-96-8    | Tris(2-chloroethyl) phosphate (T | Flame Retardant                | 8.60E-06               |
| 13-14  | DTXSID7021360 | 108-88-3    | Toulene                          | Volatile Organic Compounds     | 4.11E-05               |
| 13-14  | DTXSID5020029 | 107-13-1    | Acrylonitrile                    | Volatile Organic Compounds     | 1.29E-05               |
| 13-14  | DTXSID5020023 | 107-02-8    | Acrolein                         | Volatile Organic Compounds     | 1.33E-03               |
| 13-14  | DTXSID3020203 | 106-99-0    | 1,3-Butadiene                    | Volatile Organic Compounds     | 9.75E-04               |
| 13-14  | DTXSID6021874 | 106-94-5    | 1-Bromopropane                   | Volatile Organic Compounds     | 2.80E-05               |
| 13-14  | DTXSID3037628 | 105650-23-5 | 2-Amino-1-methyl-6-phenylimid    | Heterocyclic Amines            | 8.53E-09               |
| 13-14  | DTXSID4026214 | 101-20-2    | Triclocarban                     | Personal Care/Consumer Product | 1.21E-06               |
| 13-14  | DTXSID2021284 | 100-42-5    | Styrene                          | Volatile Organic Compounds     | 1.70E-04               |
| 13-14  | DTXSID3020596 | 100-41-4    | Ethylbenzene                     | Volatile Organic Compounds     | 5.73E-05               |
| 15-16  | DTXSID3022409 | 80-09-1     | Bisphenol S                      | Personal Care/Consumer Product | 7.08E-06               |
| 15-16  | DTXSID5020027 | 79-06-1     | Acrylamide                       | Volatile Organic Compounds     | 3.62E-05               |
| 15-16  | DTXSID0021383 | 79-01-6     | Trichloroethene                  | Volatile Organic Compounds     | 3.76E-07               |
| 15-16  | DTXSID5021207 | 75-56-9     | Propylene oxide                  | Volatile Organic Compounds     | 1.41E-04               |
| 15-16  | DTXSID3039242 | 71-43-2     | Benzene                          | Volatile Organic Compounds     | 2.91E-06               |
| 15-16  | DTXSID6020515 | 68-12-2     | N,N-Dimethylformamide            | Volatile Organic Compounds     | 6.84E-04               |
| 15-16  | DTXSID9022445 | 620-92-8    | Bisphenol F                      | Personal Care/Consumer Product | 2.45E-06               |
| 15-16  | DTXSID6023991 | 57-12-5     | Cyanide                          | Perchlorate and Other Anions   | 1.35E-03               |
| 15-16  | DTXSID8047763 | 302-04-5    | Thiocyanate                      | Perchlorate and Other Anions   | 2.02E-03               |
| 15-16  | DTXSID2021319 | 127-18-4    | Tetrachloroethene                | Volatile Organic Compounds     | 1.50E-07               |
| 15-16  | DTXSID7021360 | 108-88-3    | Toulene                          | Volatile Organic Compounds     | 4.00E-05               |
| 15-16  | DTXSID5020029 | 107-13-1    | Acrylonitrile                    | Volatile Organic Compounds     | 8.41E-06               |
| 15-16  | DTXSID5020023 | 107-02-8    | Acrolein                         | Volatile Organic Compounds     | 1.52E-03               |
| 15-16  | DTXSID3020203 | 106-99-0    | 1,3-Butadiene                    | Volatile Organic Compounds     | 1.20E-03               |
| 15-16  | DTXSID6021874 | 106-94-5    | 1-Bromopropane                   | Volatile Organic Compounds     | 3.40E-05               |
| 15-16  | DTXSID4026214 | 101-20-2    | Triclocarban                     | Personal Care/Consumer Product | 1.04E-06               |
| 15-16  | DTXSID2021284 | 100-42-5    | Styrene                          | Volatile Organic Compounds     | 7.02E-04               |
| 15-16  | DTXSID3020596 | 100-41-4    | Ethylbenzene                     | Volatile Organic Compounds     | 8.30E-05               |

| Bayesmarker_l<br>ow95CI | Bayesmarker_u<br>p95CI | SEEM_median | SEEM_low95CI | SEEM_up95CI |
|-------------------------|------------------------|-------------|--------------|-------------|
| 6.39E-04                | 7.27E-04               | 6.09E-07    | 9.15E-09     | 1.34E-03    |
| 4.23E-10                | 9.17E-03               | 1.45E-06    | 9.64E-11     | 1.73E-03    |
| 1.79E-09                | 1.92E-05               | 1.83E-07    | 1.16E-08     | 1.04E-04    |
| 1.33E-03                | 1.49E-03               | 7.21E-07    | 7.95E-09     | 7.59E-04    |
| 5.25E-04                | 5.96E-04               | 7.54E-07    | 7.94E-09     | 4.91E-04    |
| 2.74E-09                | 2.05E-02               | 5.07E-07    | 7.62E-09     | 2.72E-04    |
| 3.90E-05                | 4.21E-05               | 7.69E-06    | 3.47E-09     | 6.26E-01    |
| 6.20E-08                | 7.38E-06               | 3.40E-07    | 7.82E-12     | 3.40E-03    |
| 1.45E-04                | 1.56E-04               | 1.31E-06    | 1.90E-10     | 1.06E-01    |
| 3.62E-05                | 4.52E-05               | 2.25E-06    | 5.66E-10     | 7.22E-03    |
| 2.70E-06                | 2.98E-06               | 1.09E-06    | 2.16E-11     | 5.73E-02    |
| 8.07E-04                | 8.66E-04               | 2.22E-06    | 3.45E-09     | 1.61E-03    |
| 3.74E-04                | 9.51E-03               | 1.45E-06    | 9.64E-11     | 1.73E-03    |
| 7.86E-09                | 2.02E-02               | 5.07E-07    | 7.62E-09     | 2.72E-04    |
| 2.34E-08                | 3.81E-07               | 8.14E-06    | 8.13E-10     | 1.09E-01    |
| 4.74E-09                | 2.20E-07               | 8.07E-07    | 6.23E-09     | 2.30E-04    |
| 2.16E-06                | 2.44E-06               | 5.29E-08    | 1.36E-11     | 7.34E-03    |
| 2.31E-08                | 4.29E-06               | 3.48E-05    | 4.41E-10     | 2.88E-01    |
| 1.08E-06                | 1.27E-06               | 1.78E-05    | 8.84E-09     | 2.38E-02    |
| 8.90E-06                | 9.87E-06               | 1.31E-06    | 7.27E-09     | 2.17E-04    |
| 4.14E-05                | 4.44E-05               | 3.98E-04    | 5.42E-08     | 4.84E+01    |
| 1.25E-05                | 1.47E-05               | 1.89E-05    | 1.51E-09     | 5.36E+00    |
| 1.37E-03                | 1.45E-03               | 3.53E-06    | 1.45E-09     | 3.05E-02    |
| 1.01E-03                | 1.05E-03               | 9.36E-07    | 4.27E-10     | 3.63E-02    |
| 3.49E-05                | 3.97E-05               | 5.06E-06    | 5.22E-09     | 9.51E-03    |
| 9.28E-09                | 3.83E-03               | 4.02E-06    | 4.17E-11     | 3.71E-01    |
| 1.76E-08                | 3.90E-03               | 1.35E-05    | 1.08E-11     | 7.22E-01    |
| 6.13E-06                | 6.70E-06               | 1.40E-06    | 3.17E-10     | 2.20E-03    |
| 3.46E-05                | 3.78E-05               | 7.69E-06    | 3.47E-09     | 6.26E-01    |
| 5.83E-11                | 2.41E-06               | 3.40E-07    | 7.82E-12     | 3.40E-03    |
| 7.57E-08                | 6.07E-07               | 3.27E-07    | 5.80E-09     | 8.94E-05    |
| 5.96E-11                | 1.84E-09               | 6.34E-07    | 6.81E-09     | 4.10E-04    |
| 1.19E-04                | 1.29E-04               | 1.31E-06    | 1.90E-10     | 1.06E-01    |
| 4.12E-05                | 5.01E-05               | 2.25E-06    | 5.66E-10     | 7.22E-03    |
| 1.99E-06                | 2.24E-06               | 1.09E-06    | 2.16E-11     | 5.73E-02    |
| 4.81E-10                | 3.06E-09               | 1.64E-07    | 4.95E-09     | 1.07E-04    |
| 7.24E-04                | 7.79E-04               | 2.22E-06    | 3.45E-09     | 1.61E-03    |
| 5.34E-11                | 1.61E-09               | 1.54E-07    | 4.31E-09     | 9.93E-05    |
| 3.81E-11                | 2.89E-09               | 1.75E-07    | 4.71E-09     | 9.46E-05    |
| 1.12E-10                | 3.21E-09               | 1.59E-07    | 4.08E-09     | 5.36E-05    |
| 1.07E-10                | 3.64E-09               | 1.55E-07    | 3.68E-09     | 9.01E-05    |
| 5.62E-06                | 6.50E-06               | 2.76E-06    | 9.42E-09     | 1.59E-03    |
| 3.40E-04                | 9.07E-03               | 1.45E-06    | 9.64E-11     | 1.73E-03    |
| 7.05E-10                | 2.58E-05               | 1.83E-07    | 1.16E-08     | 1.04E-04    |
| 2.52E-06                | 2.71E-06               | 1.78E-07    | 5.81E-09     | 9.13E-05    |
| 9.37E-08                | 1.96E-02               | 5.07E-07    | 7.62E-09     | 2.72E-04    |
| 9.20E-09                | 1.16E-08               | 1.62E-07    | 4.82E-09     | 6.27E-05    |
| 6.08E-06                | 6.47E-06               | 9.92E-07    | 6.12E-09     | 8.92E-04    |
| 2.09E-08                | 4.07E-07               | 8.14E-06    | 8.13E-10     | 1.09E-01    |
| 2.64E-11                | 8.40E-08               | 8.07E-07    | 6.23E-09     | 2.30E-04    |
| 2.97E-06                | 3.31E-06               | 5.29E-08    | 1.36E-11     | 7.34E-03    |
| 5.97E-11                | 1.54E-06               | 3.48E-05    | 4.41E-10     | 2.88E-01    |

| Bayesmarker_l<br>ow95CI | Bayesmarker_u<br>p95CI | SEEM_median | SEEM_low95CI | SEEM_up95CI |
|-------------------------|------------------------|-------------|--------------|-------------|
| 3.66E-06                | 3.95E-06               | 1.78E-05    | 8.84E-09     | 2.38E-02    |
| 8.22E-06                | 9.01E-06               | 1.31E-06    | 7.27E-09     | 2.17E-04    |
| 3.96E-05                | 4.26E-05               | 3.98E-04    | 5.42E-08     | 4.84E+01    |
| 1.19E-05                | 1.40E-05               | 1.89E-05    | 1.51E-09     | 5.36E+00    |
| 1.29E-03                | 1.37E-03               | 3.53E-06    | 1.45E-09     | 3.05E-02    |
| 9.55E-04                | 9.98E-04               | 9.36E-07    | 4.27E-10     | 3.63E-02    |
| 2.62E-05                | 2.99E-05               | 5.06E-06    | 5.22E-09     | 9.51E-03    |
| 7.83E-09                | 9.32E-09               | 1.33E-07    | 3.76E-09     | 6.94E-05    |
| 8.68E-07                | 1.49E-06               | 1.15E-07    | 3.65E-09     | 5.54E-05    |
| 2.29E-09                | 3.60E-03               | 4.02E-06    | 4.17E-11     | 3.71E-01    |
| 1.78E-09                | 3.66E-03               | 1.35E-05    | 1.08E-11     | 7.22E-01    |
| 6.76E-06                | 7.42E-06               | 1.40E-06    | 3.17E-10     | 2.20E-03    |
| 3.49E-05                | 3.76E-05               | 7.69E-06    | 3.47E-09     | 6.26E-01    |
| 1.92E-09                | 9.85E-06               | 3.40E-07    | 7.82E-12     | 3.40E-03    |
| 1.36E-04                | 1.45E-04               | 1.31E-06    | 1.90E-10     | 1.06E-01    |
| 2.78E-06                | 3.04E-06               | 1.09E-06    | 2.16E-11     | 5.73E-02    |
| 6.65E-04                | 7.05E-04               | 2.22E-06    | 3.45E-09     | 1.61E-03    |
| 2.19E-06                | 2.75E-06               | 2.76E-06    | 9.42E-09     | 1.59E-03    |
| 3.99E-04                | 8.74E-03               | 1.45E-06    | 9.64E-11     | 1.73E-03    |
| 4.23E-08                | 1.86E-02               | 5.07E-07    | 7.62E-09     | 2.72E-04    |
| 1.48E-09                | 2.73E-06               | 3.48E-05    | 4.41E-10     | 2.88E-01    |
| 3.89E-05                | 4.12E-05               | 3.98E-04    | 5.42E-08     | 4.84E+01    |
| 7.74E-06                | 9.16E-06               | 1.89E-05    | 1.51E-09     | 5.36E+00    |
| 1.48E-03                | 1.56E-03               | 3.53E-06    | 1.45E-09     | 3.05E-02    |
| 1.18E-03                | 1.22E-03               | 9.36E-07    | 4.27E-10     | 3.63E-02    |
| 3.23E-05                | 3.60E-05               | 5.06E-06    | 5.22E-09     | 9.51E-03    |
| 6.24E-07                | 1.41E-06               | 1.15E-07    | 3.65E-09     | 5.54E-05    |
| 3.44E-07                | 3.96E-03               | 4.02E-06    | 4.17E-11     | 3.71E-01    |
| 2.17E-08                | 4.02E-03               | 1.35E-05    | 1.08E-11     | 7.22E-01    |

Table S10. R-squared values and 95% CIs for comparison of bayesmarker exposure inferences and SEEM predictions for chemicals not in the SEEM training set for the four most recent NHANES cohorts.

| Cohort | Population                     | Rsquared | low95CI | up95CI |
|--------|--------------------------------|----------|---------|--------|
| 09-10  | Total                          | 0.0291   | 0.0183  | 0.043  |
| 09-10  | Perchlorate and Other Anions   | 1        | 1       | 1      |
| 09-10  | Phytoestrogens                 | 0.0263   | 0.0159  | 0.0397 |
| 09-10  | Organophosphorus Insecticides  | NA       | NA      | NA     |
| 11-12  | Total                          | 0.0427   | 0.0343  | 0.0535 |
| 11-12  | Volatile Organic Compounds     | 0.214    | 0.1953  | 0.2334 |
| 11-12  | FlameRetardant                 | 0.0014   | 0       | 0.0073 |
| 11-12  | Perchlorate and Other Anions   | 1        | 1       | 1      |
| 11-12  | Unknown                        | NA       | NA      | NA     |
| 13-14  | Total                          | 0.0229   | 0.0177  | 0.0284 |
| 13-14  | Volatile Organic Compounds     | 0.2201   | 0.2021  | 0.238  |
| 13-14  | Personal Care/Consumer Product | 0.4908   | 0.4657  | 0.5187 |
| 13-14  | Heterocyclic Amines            | 0.3596   | 0.3407  | 0.3789 |
| 13-14  | Flame Retardant                | 0.0027   | 2e-04   | 0.0075 |
| 13-14  | Perchlorate and Other Anions   | 1        | 1       | 1      |
| 13-14  | Organophosphorus Insecticides  | NA       | NA      | NA     |
| 13-14  | Unknown                        | 1        | 1       | 1      |
| 15-16  | Total                          | 0.1666   | 0.1522  | 0.1823 |
| 15-16  | Volatile Organic Compounds     | 0.2494   | 0.23    | 0.2703 |
| 15-16  | Personal Care/Consumer Product | 0.0778   | 0.0575  | 0.1044 |
| 15-16  | Perchlorate and Other Anions   | 1        | 1       | 1      |
